# Supplementary material
Source: PubMed Central journal article supplement (PMC8192493)
Supplement: NIHMS1697056-supplement-ESI.pdf [file NIHMS1697056-supplement-ESI.pdf]

# Supporting Information

## A Modular Synthetic Route Involving *N*-Aryl-2-Nitrosoaniline Intermediates Leads to a New Series of 3-Substituted Halogenated Phenazine Antibacterial Agents

Hongfen Yang<sup>[a]</sup>, Shivani Kundra<sup>[b]</sup>, Michaelle Chojnacki<sup>[c]</sup>, Ke Liu<sup>[a]</sup>, Marisa A. Fuse<sup>[e]</sup>, Yasmeen Abouelhassan<sup>[a]</sup>, Dimitris Kallifidas<sup>[a]</sup>, Peilan Zhang<sup>[a]</sup>, Guangtao Huang<sup>[d]</sup>, Shouguang Jin<sup>[d]</sup>, Yousong Ding<sup>[a]</sup>, Hendrik Luesch<sup>[a]</sup>, Kyle H. Rohde<sup>[e]</sup>, Paul M. Dunman<sup>[c]</sup>, José A. Lemos<sup>[b]</sup>, Robert W. Huigens III<sup>[a]\*</sup>

<sup>[a]</sup>Department of Medicinal Chemistry, College of Pharmacy, Center for Natural Products, Drug Discovery and Development (CNP3), University of Florida, Gainesville, Florida 32610; <sup>[b]</sup>Department of Oral Biology, College of Dentistry, University of Florida; <sup>[c]</sup>Department of Microbiology and Immunology, University of Rochester, Rochester, NY 14642; <sup>[d]</sup>Department of Molecular Genetics & Microbiology, College of Medicine, University of Florida; <sup>[e]</sup>Burnett School of Biomedical Sciences, College of Medicine, University of Central Florida, Orlando, FL 32827.

\*Corresponding Author: [rhuijens@cop.ufl.edu](mailto:rhuijens@cop.ufl.edu)

## Table of Contents

|                                                                                     |     |
|-------------------------------------------------------------------------------------|-----|
| 1.) Figure S1. Compounds reported in the manuscript.                                | S3  |
| 2.) Figure S2. Compounds reported in the supporting information.                    | S4  |
| 3.) Figure S3. Activity profiles with pKa and CLogP values for select HP analogues. | S5  |
| 4.) Table S1. Select nitroso intermediates characterized.                           | S6  |
| 5.) Table S2. Summary of MIC assays against MRSA clinical isolates.                 | S7  |
| 6.) Synthetic Procedures.                                                           | S8  |
| 7.) UV-Vis Spectroscopy.                                                            | S9  |
| 8.) MIC Assays.                                                                     | S10 |
| 9.) Dose-Response Curves of HPs against <i>Mycobacterium tuberculosis</i> CDC1551.  | S15 |
| 10.) Biofilm Eradication Assays with Calgary Biofilm Devices.                       | S16 |
| 11.) Iron Starvation in MRSA Biofilms via RT-qPCR.                                  | S19 |
| 12.) HeLa Cytotoxicity: LDH Release Results.                                        | S22 |
| 13.) HEK-293 Cytotoxicity of HP 29.                                                 | S23 |
| 14.) pKa Value Determination for Select HPs.                                        | S24 |
| 15.) Compound Purity Analysis.                                                      | S27 |
| 16.) Literature References.                                                         | S50 |
| 17.) NMR Spectra.                                                                   | S51 |

1.) **Figure S1.** Compounds reported in the manuscript.

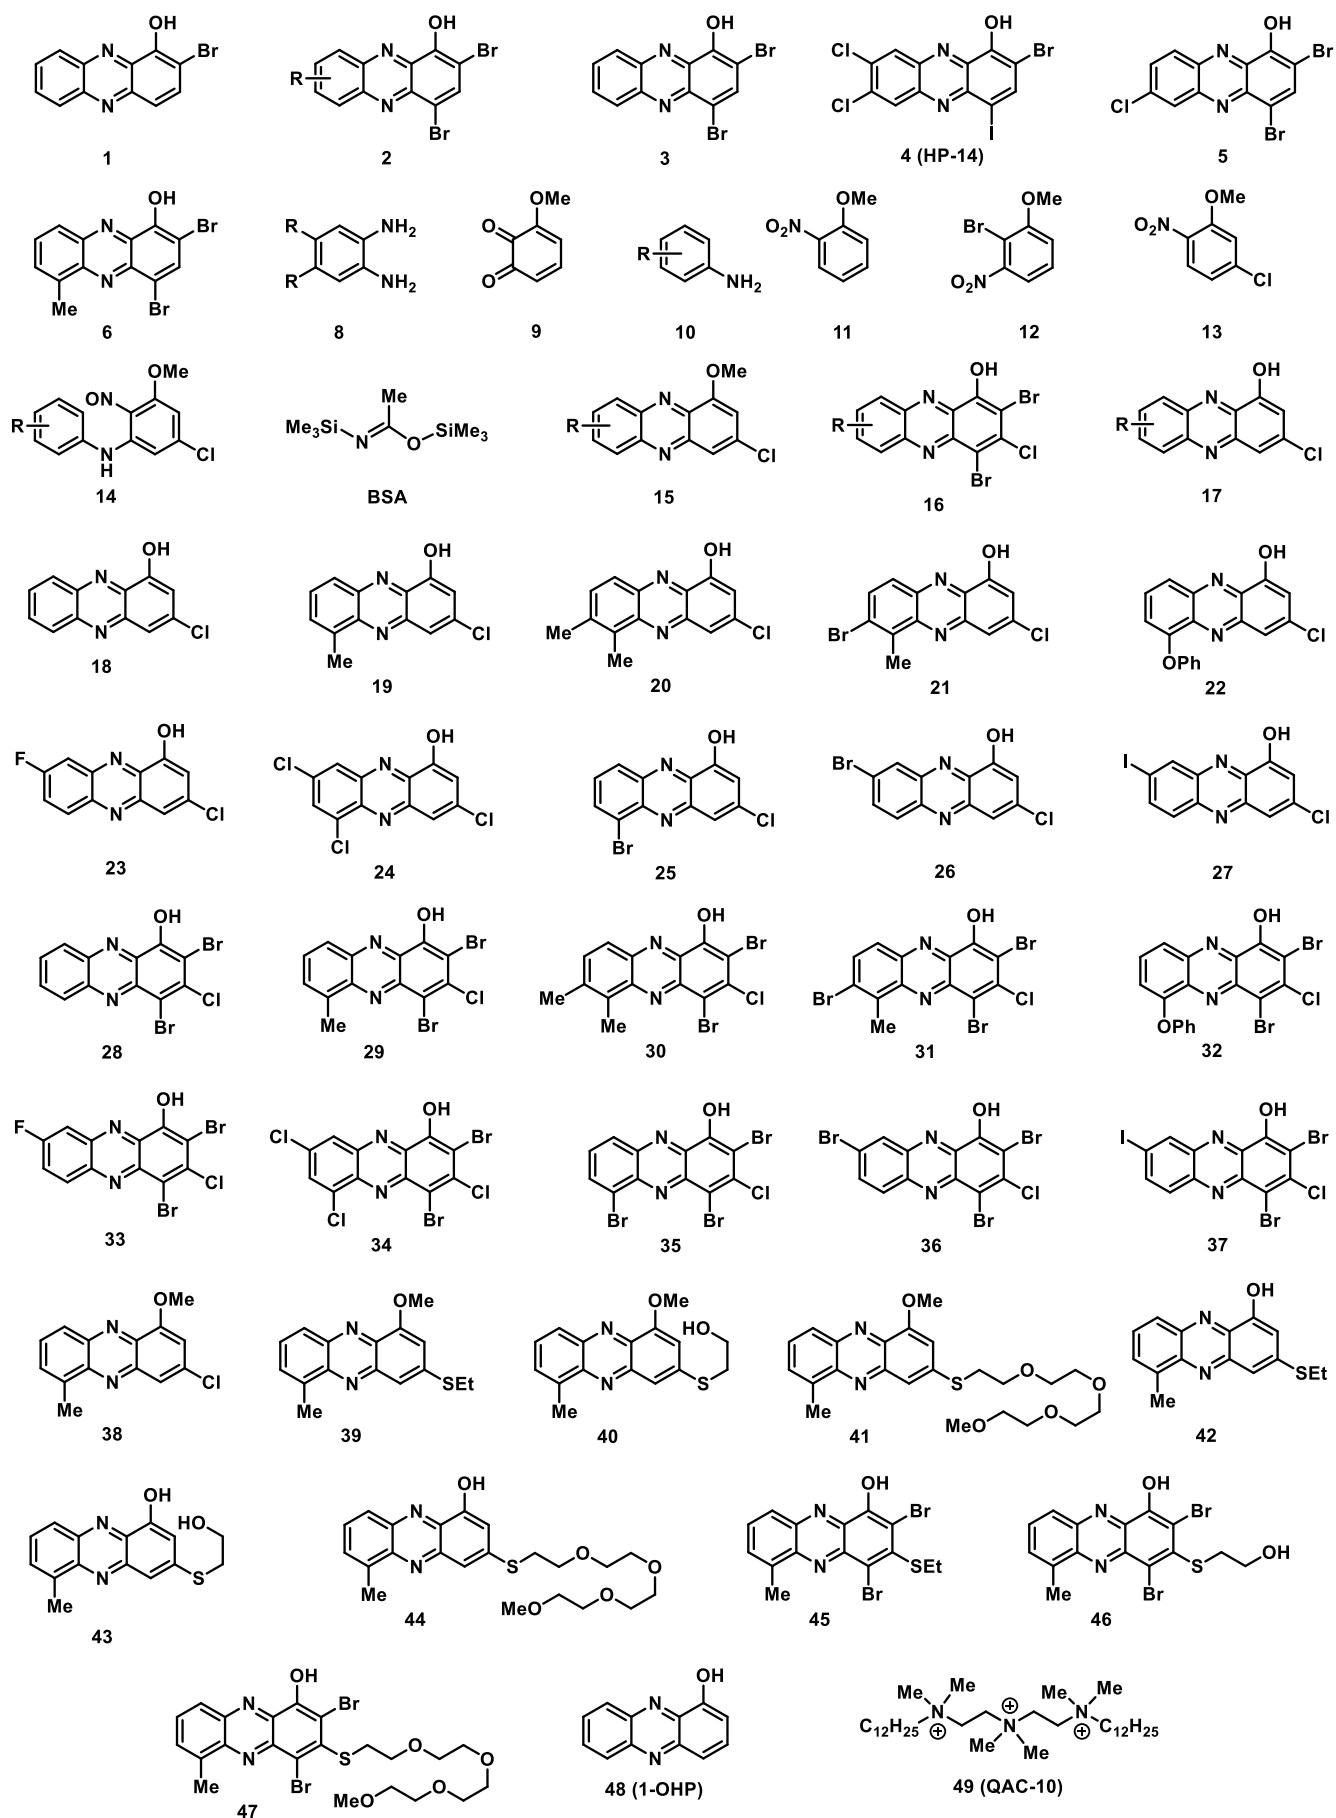

2.) **Figure S2.** Compounds reported in the supporting information.

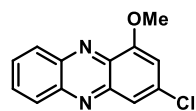

50

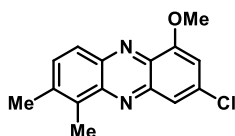

51

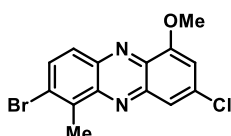

52

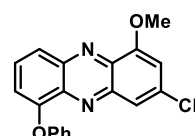

53

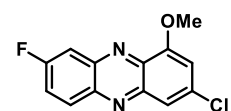

54

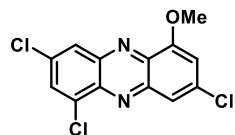

55

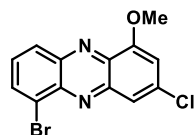

56

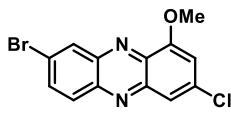

57

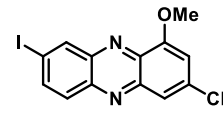

58

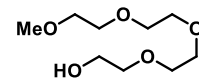

59

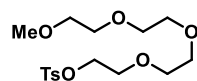

60

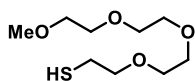

61

### 3.) Figure S3. Activity profiles with pKa and CLogP values for select HP analogues.

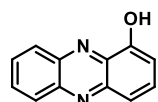

48 (1-OHP)

CLogP: 3.17  
pKa: 9.37

|       | MIC  | MBEC (μM) |
|-------|------|-----------|
| MRSA: | 50   | --        |
| MRSE: | 37.5 | --        |
| VRE:  | > 50 | --        |

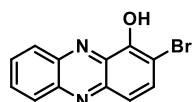

1

CLogP: 3.80  
pKa: 7.61

|       | MIC  | MBEC (μM) |
|-------|------|-----------|
| MRSA: | 3.13 | --        |
| MRSE: | 3.13 | --        |
| VRE:  | 6.25 | --        |

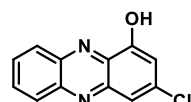

18

CLogP: 3.93  
pKa: 8.04

|       | MIC  | MBEC (μM) |
|-------|------|-----------|
| MRSA: | 25   | --        |
| MRSE: | 18.8 | --        |
| VRE:  | > 50 | --        |

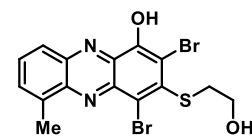

46

CLogP: 4.61  
pKa: 8.07

|       | MIC  | MBEC (μM) |
|-------|------|-----------|
| MRSA: | 6.25 | --        |
| MRSE: | 4.69 | --        |
| VRE:  | 12.5 | --        |

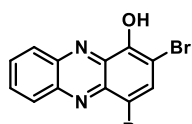

3

CLogP: 4.68  
pKa: 7.12

|       | MIC  | MBEC (μM) |
|-------|------|-----------|
| MRSA: | 1.56 | 100       |
| MRSE: | 2.35 | 50        |
| VRE:  | 4.69 | 12.5      |

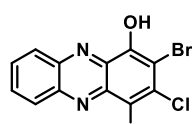

28

CLogP: 5.12  
pKa: 5.93

|       | MIC  | MBEC (μM) |
|-------|------|-----------|
| MRSA: | 0.15 | 50        |
| MRSE: | 0.59 | 25        |
| VRE:  | 1.17 | 2.35      |

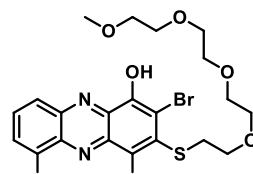

47

CLogP: 5.12  
pKa: 7.93

|       | MIC  | MBEC (μM) |
|-------|------|-----------|
| MRSA: | 2.35 | --        |
| MRSE: | 2.35 | --        |
| VRE:  | 3.13 | --        |

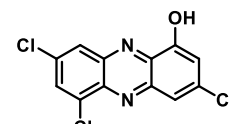

24

CLogP: 5.37  
pKa: 6.89

|       | MIC  | MBEC (μM) |
|-------|------|-----------|
| MRSA: | 0.30 | 75        |
| MRSE: | 1.17 | --        |
| VRE:  | 2.35 | --        |

#### KEY:

| Increased Potency ↑ | MIC (μM)    | MBEC (μM) |
|---------------------|-------------|-----------|
|                     | < 0.10      | < 1       |
|                     | 0.10 - 0.59 | 1 - 4.69  |
|                     | 1.17 - 3.13 | 6.25 - 25 |
|                     | 4.69 - 6.25 | 37.5 - 75 |
|                     | 12.5 - 50   | 100 - 200 |
| > 50                | > 200       |           |

Most Potent Antibacterial Activities  
CLogP > 5.6

pKa does not dramatically impact activities

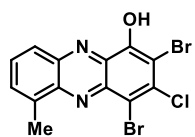

29

CLogP: 5.62  
pKa: 6.79

|       | MIC   | MBEC (μM) |
|-------|-------|-----------|
| MRSA: | 0.075 | 2.35      |
| MRSE: | 0.075 | 0.59      |
| VRE:  | 0.10  | 0.59      |

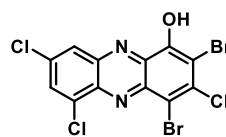

34

CLogP: 6.55  
pKa: 6.07

|       | MIC   | MBEC (μM) |
|-------|-------|-----------|
| MRSA: | 0.59  | 3.13      |
| MRSE: | 0.05  | 0.30      |
| VRE:  | 0.075 | 0.20      |

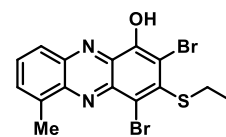

45

CLogP: 6.45  
pKa: 7.88

|       | MIC  | MBEC (μM) |
|-------|------|-----------|
| MRSA: | 0.30 | 200       |
| MRSE: | 0.30 | 4.69      |
| VRE:  | 0.39 | 3.13      |

#### 4.) Table S1. Select nitroso intermediates characterized.

Select nitroso intermediates en route to 1-methoxyphenazines were identified using low resolution MS. Comparative yields of 1-methoxyphenazine from cyclization with purified nitroso intermediates and cyclization with crude intermediates are included below.

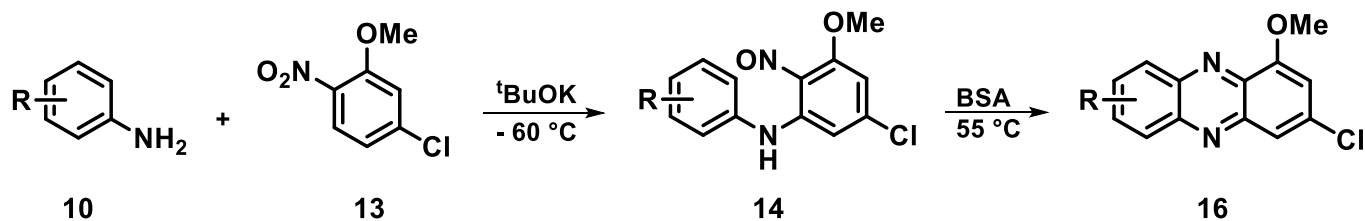

Nitroso Intermediate

Confirmed by Low Resolution MS

| Aniline                                                                             | Nitroso 14<br>%Yield | 1-OMe HPs (16) Yield Over 2 Steps |               |
|-------------------------------------------------------------------------------------|----------------------|-----------------------------------|---------------|
|                                                                                     |                      | Purified Nitroso                  | Crude Nitroso |
| 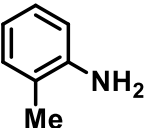   | 84%                  | 73%                               | 80%           |
|  | 77%                  | 70%                               | 82%           |

**Note:** Crude nitroso intermediates were synthesized and divided into two equal portions. One portion was purified by flash chromatography to get the pure nitroso intermediate (confirmed by low resolution MS) before cyclization to the corresponding 1-methoxyphenazine. The other nitroso portion was directly subjected to cyclization crude, similar to the synthetic approach detailed in the manuscript. Comparison of the final yield of 1-methoxyphenazines showed that cyclization of the crude nitroso gave slightly higher yields than with pure nitroso intermediates in our hands.

**5.) Table S2. Summary of MIC assays against MRSA clinical isolates.** All MIC values are reported in micromolar ( $\mu\text{M}$ ) concentrations.

| Compound             | MRSA-1707         | MRSA 1            | MRSA 2            | <i>S. aureus</i> 129 | <i>S. aureus</i> 147 | <i>S. aureus</i> 138 | <i>S. aureus</i> 156 |
|----------------------|-------------------|-------------------|-------------------|----------------------|----------------------|----------------------|----------------------|
| <b>3</b>             | 1.56 <sup>b</sup> | 1.25              | 1.88 <sup>a</sup> | 1.88 <sup>a</sup>    | 1.88 <sup>a</sup>    | 2.5                  | 1.25                 |
| <b>29</b>            | 0.08 <sup>a</sup> | 0.06 <sup>a</sup> | 0.12 <sup>a</sup> | 0.12 <sup>a</sup>    | 0.12 <sup>a</sup>    | 0.08                 | 0.08                 |
| <b>34</b>            | 0.59 <sup>a</sup> | 1.25              | 0.94              | 0.63                 | 0.47 <sup>a</sup>    | 0.94 <sup>a</sup>    | 0.47 <sup>a</sup>    |
| <b>45</b>            | 0.30 <sup>a</sup> | 0.31              | 0.63              | 0.47 <sup>a</sup>    | 0.47 <sup>a</sup>    | 0.47 <sup>a</sup>    | 0.47 <sup>a</sup>    |
| <b>Vancomycin</b>    | 0.39              | 0.39              | 0.39              | 0.39                 | 0.59 <sup>a</sup>    | 0.39                 | 0.39                 |
| <b>Methicillin</b>   | 18.8 <sup>a</sup> | 37.5 <sup>a</sup> | >100              | 37.5 <sup>a</sup>    | 6.25                 | 37.5 <sup>a</sup>    | 37.5 <sup>a</sup>    |
| <b>Ciprofloxacin</b> | 0.59 <sup>a</sup> | 0.78              | >100              | >100                 | 1.17 <sup>a</sup>    | >100                 | 0.78 <sup>b</sup>    |

Notes: All MIC values were recorded from a minimum of three independent biological assays. <sup>a</sup> = midpoint of a 2-fold range in observed MIC values. <sup>b</sup> = midpoint of a 4-fold range in observed MIC values. For these MIC assays, HPs were tested at a range of 0.01 - 10  $\mu\text{M}$ , while antibiotics were tested at a range of 0.1 - 100  $\mu\text{M}$ .

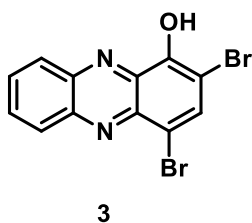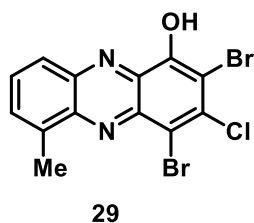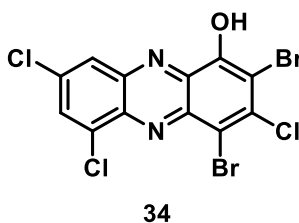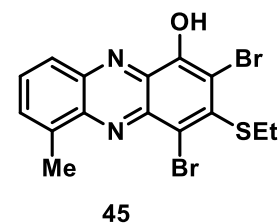

Clinical isolates MRSA 1, MRSA 2, *S. aureus* 129, *S. aureus* 147, *S. aureus* 138 and *S. aureus* 156 were obtained from the Emerging Pathogens Institute (EPI) at the University of Florida and isolated from patients treated at UF Health Shands Hospital (Gainesville, FL). Methicillin has an MIC = 0.78  $\mu\text{M}$  against *S. aureus* strain ATCC 29213, which is susceptible to this antibiotic. MRSA-1707 was obtained from ATCC (MRSA strain BAA-1707) and included in this table as a comparator.

## 6.) Synthetic Procedures.

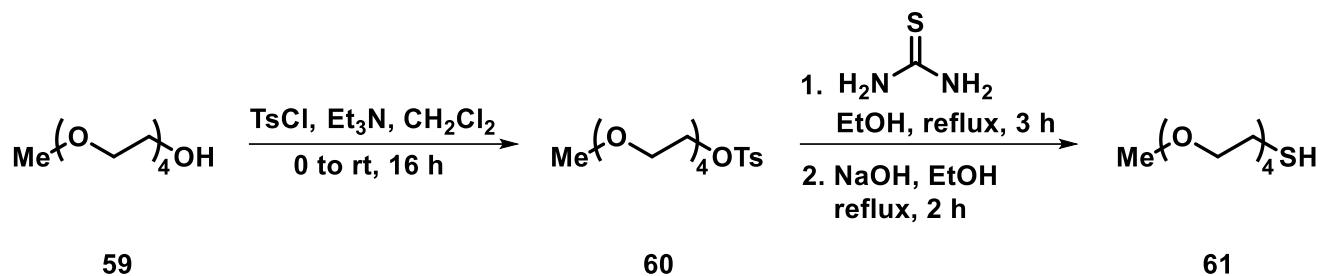

**Procedures.** The title compound was synthesized according to modified literature procedures.<sup>1,2</sup>

### First step:

Tetraethylene glycol monomethyl ether (2.18 g, 13.4 mmol) was dissolved in dichloromethane (12 mL) before triethylamine (2.25 mL, 16.02 mmol) was added. Then, a solution of 4-toluenesulfonyl chloride (2.55 g, 13.4 mmol) in dichloromethane (2 mL) was added at 0 °C and the resulting reaction mixture was allowed to stir at room temperature for 3 days before being quenched with brine. The mixture was then transferred to a separatory funnel and extracted with dichloromethane (3 x 30 mL). The organic layers were collected and dried with anhydrous sodium sulfate, filtered, and concentrated *in vacuo* to afford **60** as a colorless oil (100%, 5.5 g). Note: Our <sup>1</sup>H NMR align with the previously reported spectra for **60** (CAS: 62921-76-0).<sup>1</sup>

### Second step:

Intermediate **60** (2.90 g, 8.00 mmol) was dissolved in ethanol (5 mL). Then, thiourea (609 mg, 8.00 mmol) was added to the solution along with deionized water (3.5 mL). The resulting reaction mixture was then heated to reflux and allowed to stir for 3 hours. After that time, a solution of sodium hydroxide (384 mg, 9.60 mmol) in water (2.5 mL) was added to the mixture, which was heated to reflux and allowed to stir for an additional 2 hours. When the reaction was complete, the mixture was cooled to room temperature and concentrated to 6 mL *in vacuo*, neutralized with 1 M hydrochloric acid until pH 7, and extracted with dichloromethane. The organic layers were combined and dried with anhydrous sodium sulfate, filtered, and concentrated *in vacuo*. The resulting crude oil was purified using flash column chromatography with 4:1 to 1:1 hexanes:ethyl acetate to yield **61** as a colorless oil (82%, 1.38 g). Note: Our <sup>1</sup>H NMR align with the previously reported spectra for **61** (CAS: 52190-55-3).<sup>2</sup>



## 7.) UV-Vis Spectroscopy.

We use UV-Vis to show iron(II) binding, which form a 2:1 HP:iron(II) complex as shown below.<sup>3-5</sup>

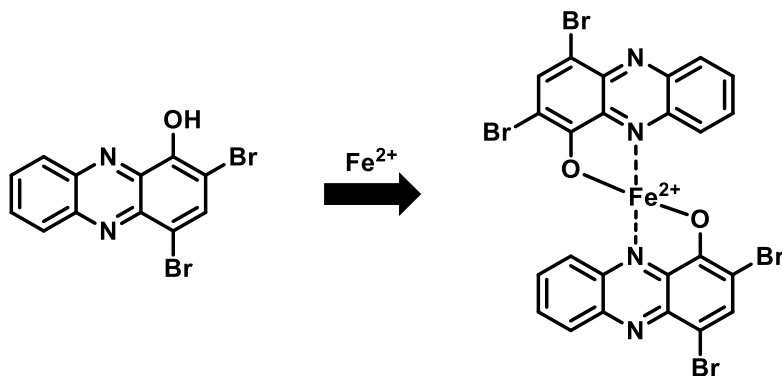

UV-Vis analysis of iron(II) binding with halogenated phenazine **34** (other HPs are presented in the manuscript).

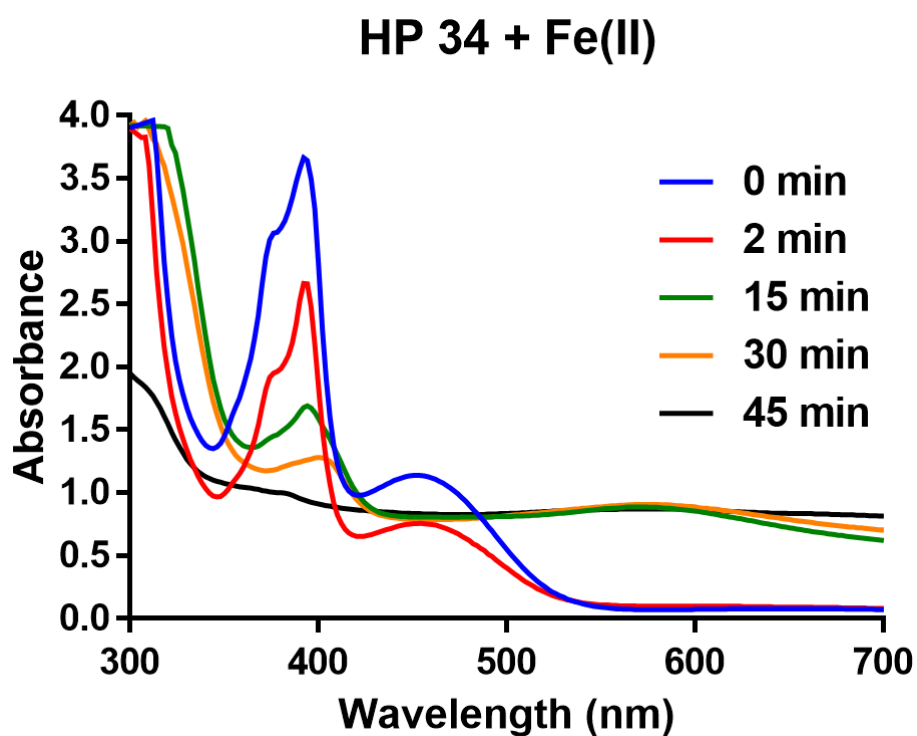

## 8.) MIC Assays.

Images of representative MIC assays performed during these studies (2-fold serial dilution concentrations).

### MRSA-44

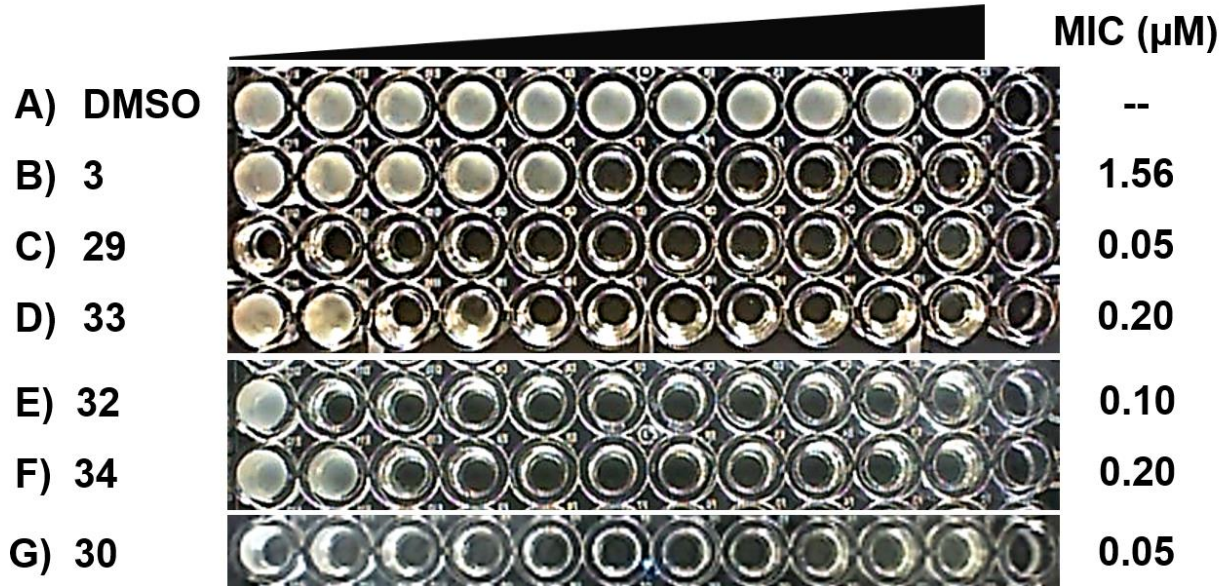

Test concentration: 0.05 - 50 µM

### MRSE 35984

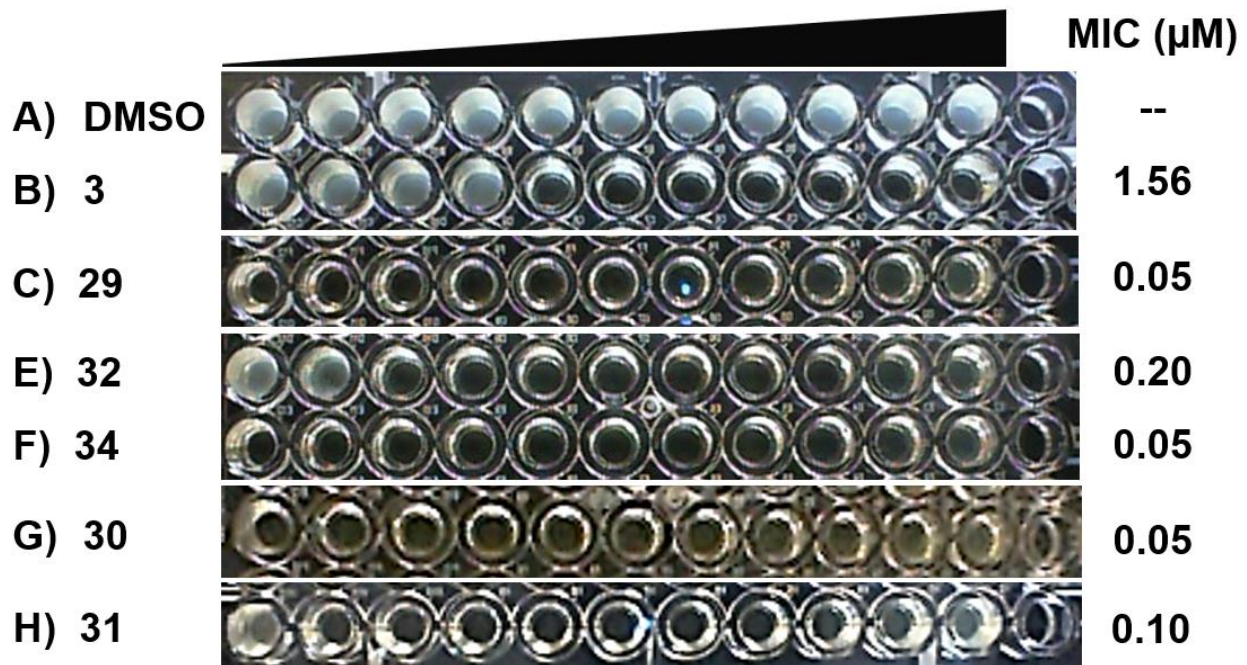

Test concentration: 0.05 - 50 µM

# VRE 700221

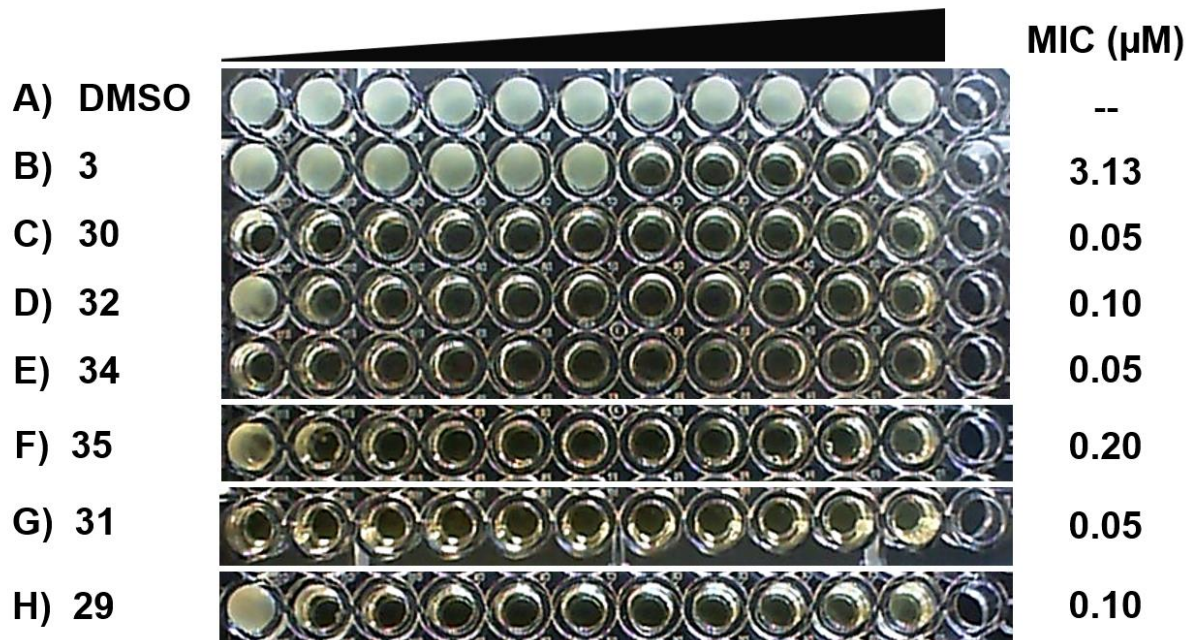

Test concentration: 0.05 - 50  $\mu\text{M}$

## HP 29 (FY-3-70) against *S. pneumoniae* 6303

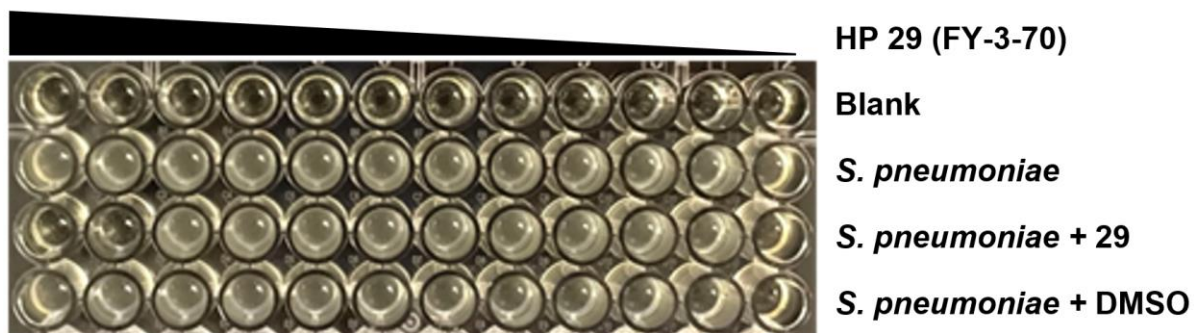

Test concentration: 0.5 - 1000 nM

Vanco. = vancomycin, Cipro. = ciprofloxacin

## MRSA 1

|                 | MIC ( $\mu\text{M}$ ) |
|-----------------|-----------------------|
| A) DMSO         | --                    |
| B) 3            | 1.25                  |
| C) 29           | 0.04                  |
| D) 34           | 1.25                  |
| E) 45           | 0.31                  |
| F) Vanco.*      | 0.39                  |
| G) Methicillin* | 25                    |
| H) Cipro.*      | 0.78                  |

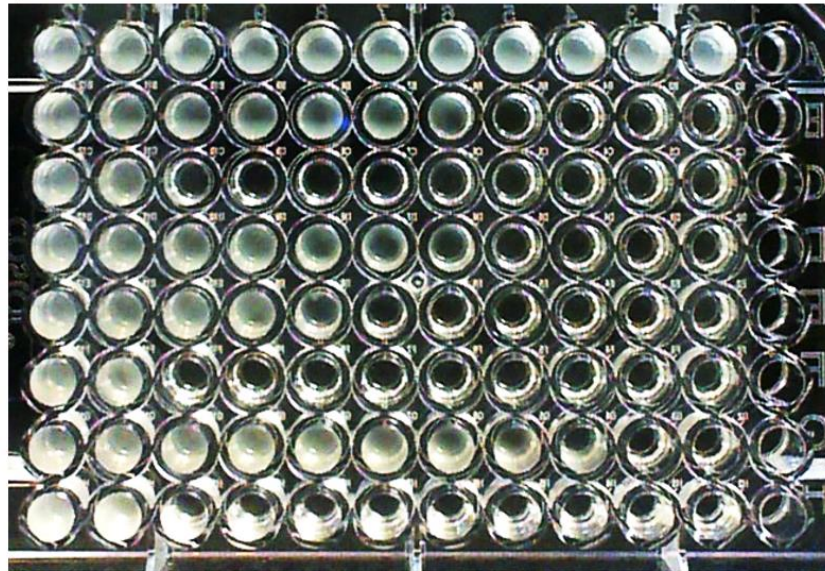

Test concentration: 0.01 - 10  $\mu\text{M}$ ; 0.1 - 100  $\mu\text{M}$ \*

## MRSA 2

|                 | MIC ( $\mu\text{M}$ ) |
|-----------------|-----------------------|
| A) DMSO         | --                    |
| B) 3            | 1.25                  |
| C) 29           | 0.08                  |
| D) 34           | 1.25                  |
| E) 45           | 0.63                  |
| F) Vanco.*      | 0.39                  |
| G) Methicillin* | > 100                 |
| H) Cipro.*      | > 100                 |

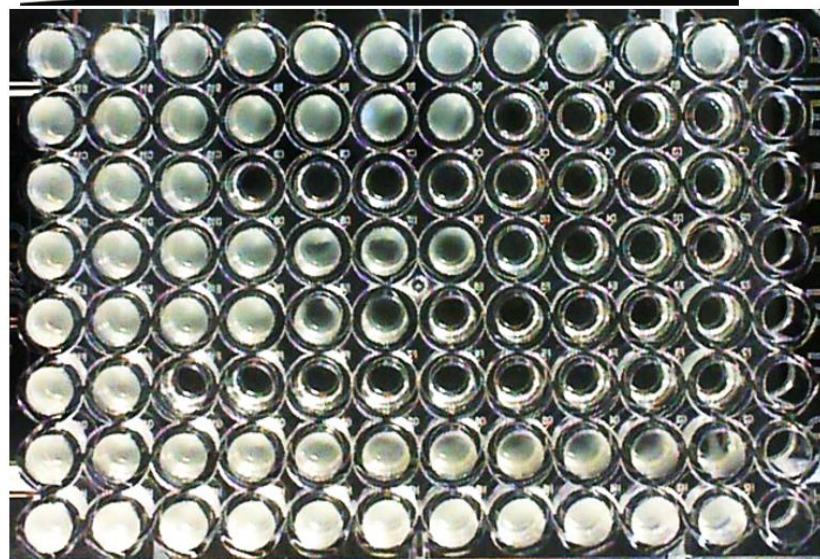

Test concentration: 0.01 - 10  $\mu\text{M}$ ; 0.1 - 100  $\mu\text{M}$ \*

# *S. aureus* 129

|                 |                                                                                    | MIC ( $\mu\text{M}$ ) |
|-----------------|------------------------------------------------------------------------------------|-----------------------|
| A) DMSO         |  | --                    |
| B) 3            |  | 2.5                   |
| C) 29           |  | 0.16                  |
| D) 34           |  | 0.63                  |
| E) 45           |  | 0.63                  |
| F) Vanco.*      |  | 0.39                  |
| G) Methicillin* |  | 50                    |
| H) Cipro.*      |  | > 100                 |

Test concentration: 0.01 - 10  $\mu\text{M}$ ; 0.1 - 100  $\mu\text{M}$ \*

# *S. aureus* 147

|                 |                                                                                      | MIC ( $\mu\text{M}$ ) |
|-----------------|--------------------------------------------------------------------------------------|-----------------------|
| A) DMSO         |  | --                    |
| B) 3            |  | 2.5                   |
| C) 29           |  | 0.08                  |
| D) 34           |  | 0.63                  |
| E) 45           |  | 0.63                  |
| F) Vanco.*      |  | 0.78                  |
| G) Methicillin* |  | 6.25                  |
| H) Cipro.*      |  | 0.78                  |

Test concentration: 0.01 - 10  $\mu\text{M}$ ; 0.1 - 100  $\mu\text{M}$ \*

# *S. aureus* 138

- A) DMSO
- B) 3
- C) 29
- D) 34
- E) 45
- F) Vanco.\*
- G) Methicillin\*
- H) Cipro.\*

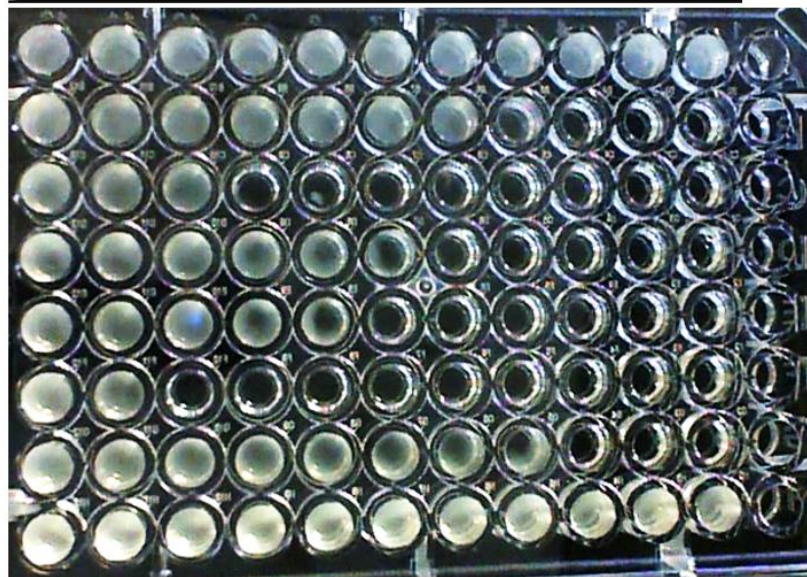

| MIC ( $\mu\text{M}$ ) |
|-----------------------|
| --                    |
| 2.5                   |
| 0.08                  |
| 0.63                  |
| 0.31                  |
| 0.39                  |
| 25                    |
| > 100                 |

Test concentration: 0.01 - 10  $\mu\text{M}$ ; 0.1 - 100  $\mu\text{M}$ \*

# *S. aureus* 156

- A) DMSO
- B) 3
- C) 29
- D) 34
- E) 45
- F) Vanco.\*
- G) Methicillin\*
- H) Cipro.\*

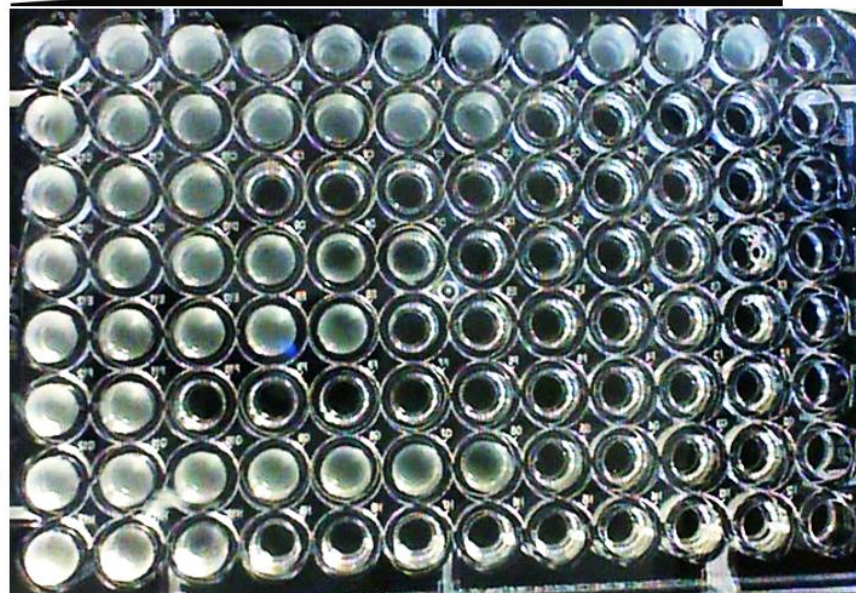

| MIC ( $\mu\text{M}$ ) |
|-----------------------|
| --                    |
| 1.25                  |
| 0.08                  |
| 0.63                  |
| 0.31                  |
| 0.39                  |
| 25                    |
| 0.78                  |

Test concentration: 0.01 - 10  $\mu\text{M}$ ; 0.1 - 100  $\mu\text{M}$ \*

## 9.) Dose-Response Curves of HPs against *Mycobacterium tuberculosis* CDC1551.

Dose-response curves determined from OD readings of MIC assays performed in 96-well plates.

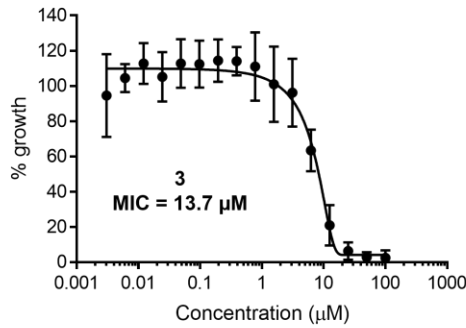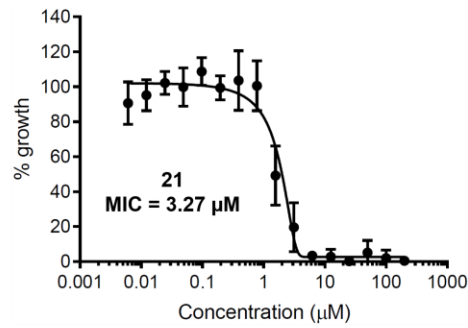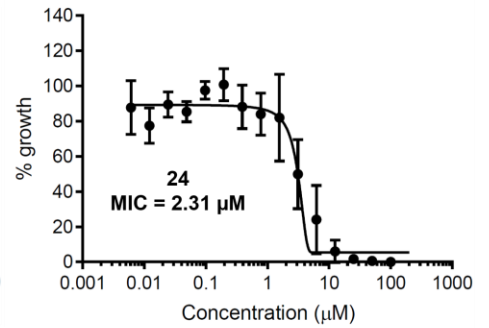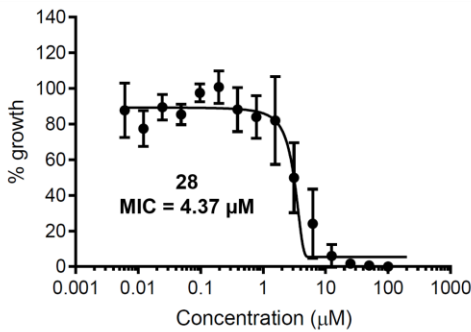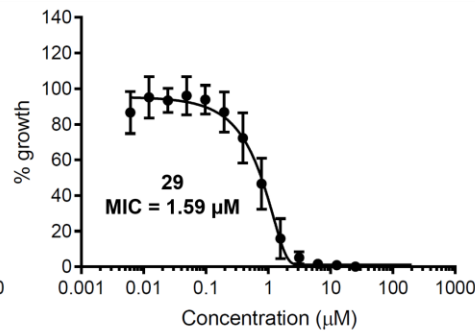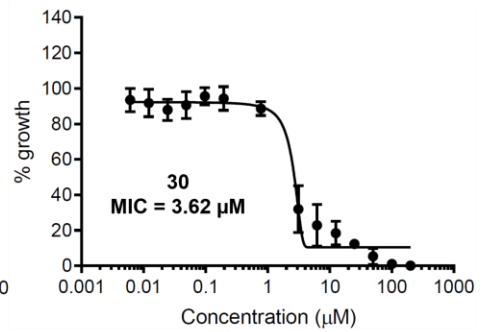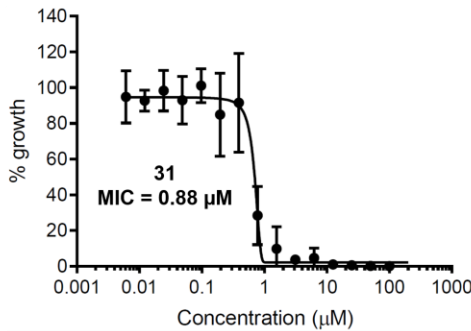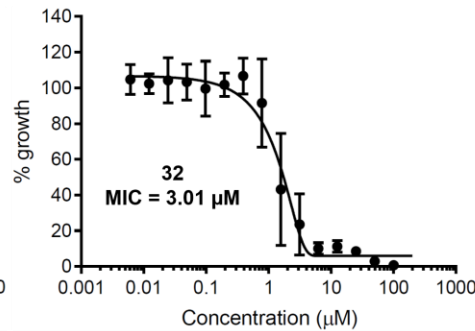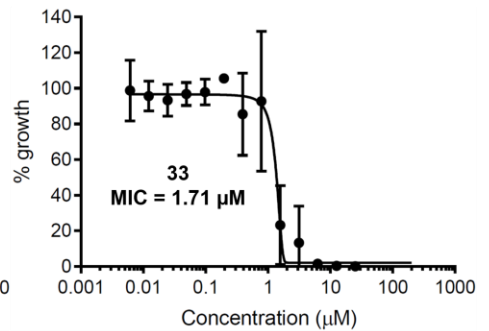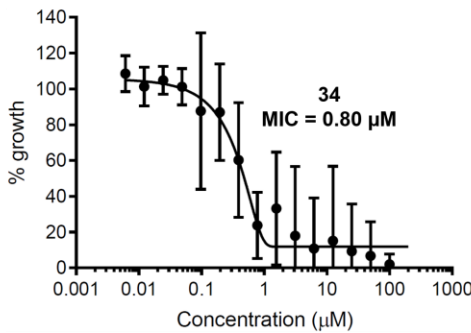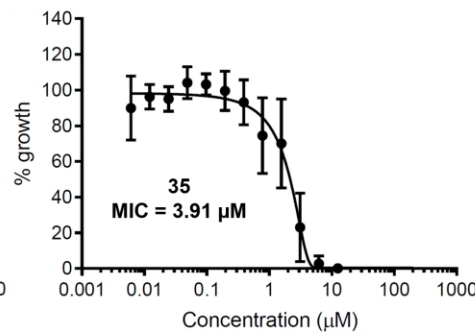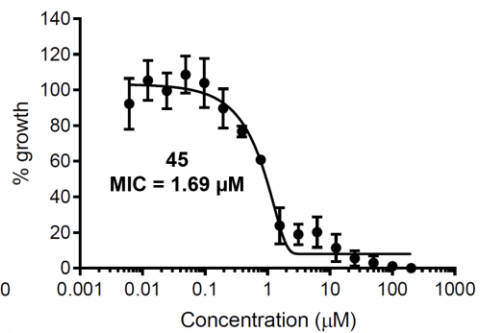

## 10.) Biofilm Eradication Assays with Calgary Biofilm Devices.

Assay workflow to determine planktonic and biofilm eradication activities.

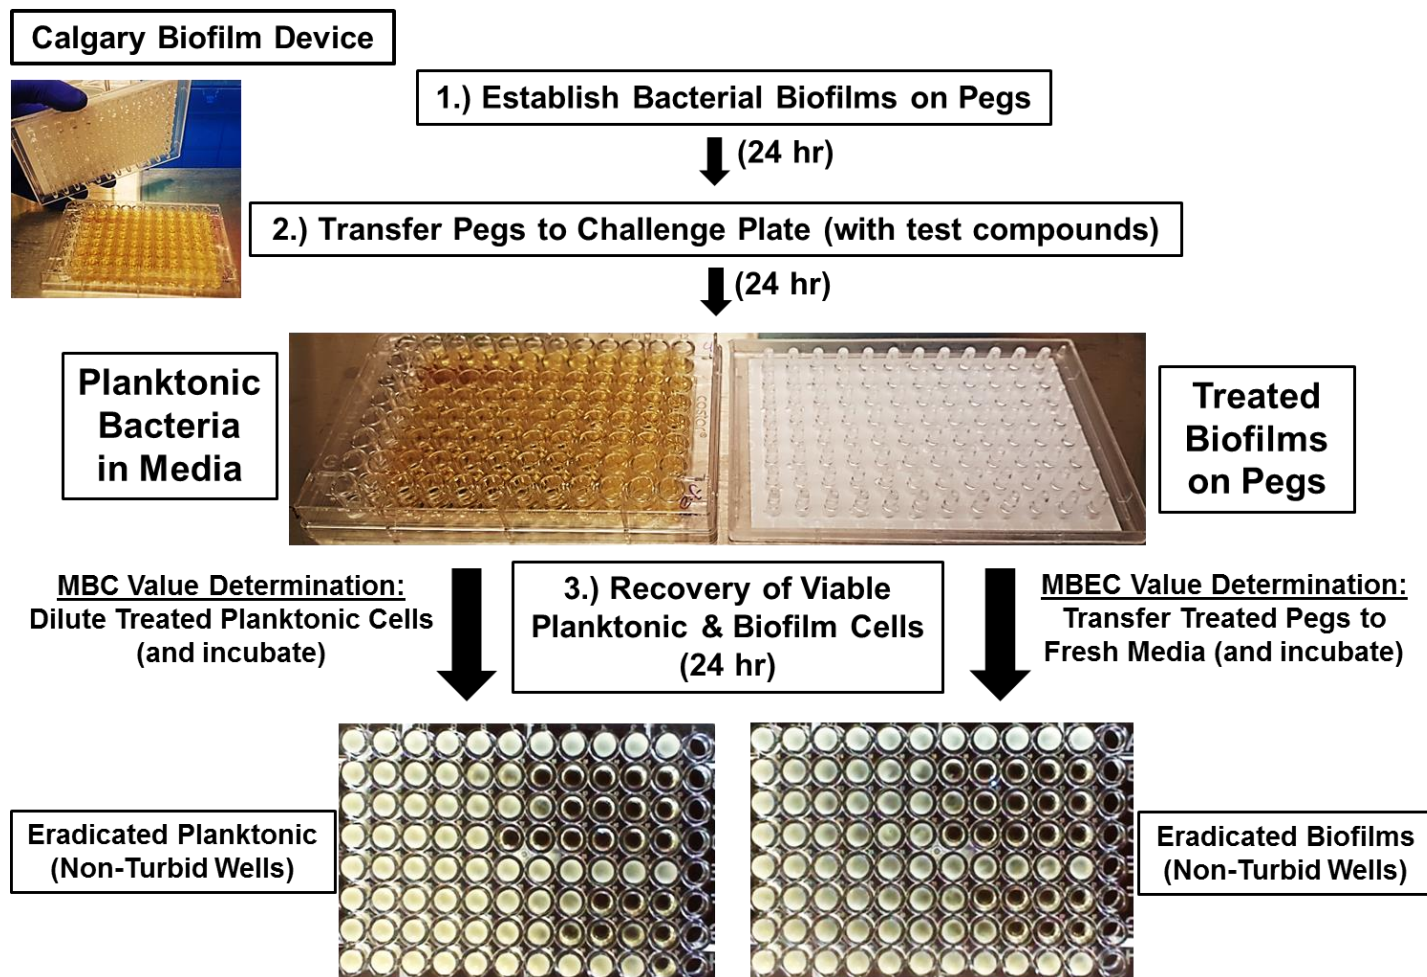



Images of representative CBD assays performed during these studies.

### MRSA-1707

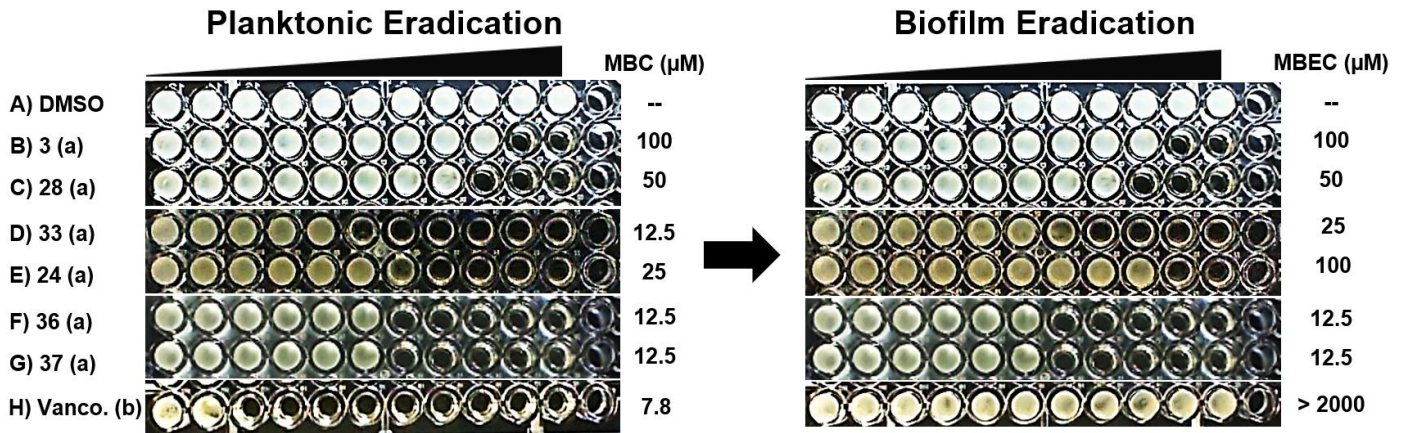

(a) Test concentration: 0.2 – 200  $\mu\text{M}$ ; (b) Test concentration: 2-2000  $\mu\text{M}$ ; Vanco. (Vancomycin).

### MRSA-44

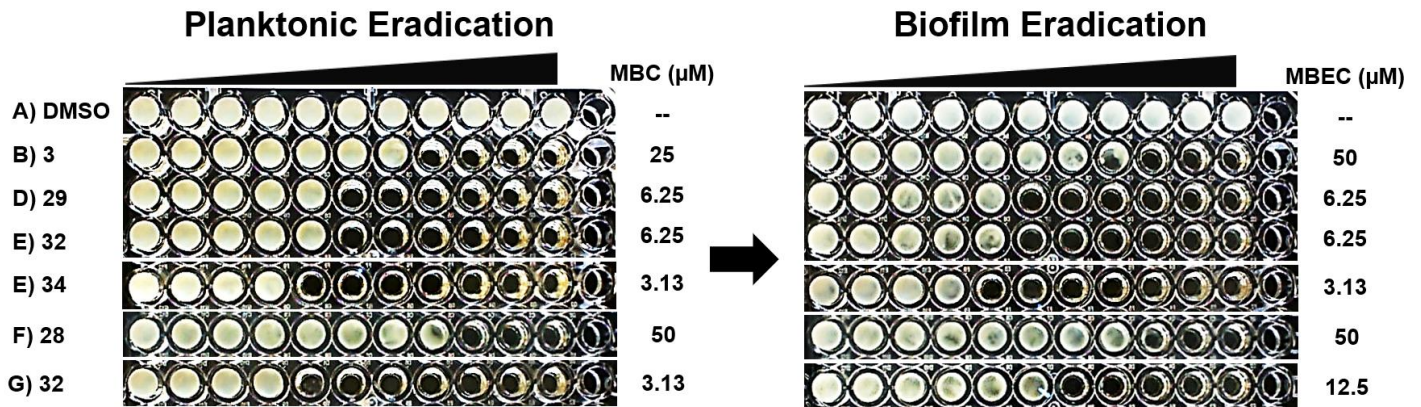

Test concentration: 0.2 – 200  $\mu\text{M}$

### MRSE 35984

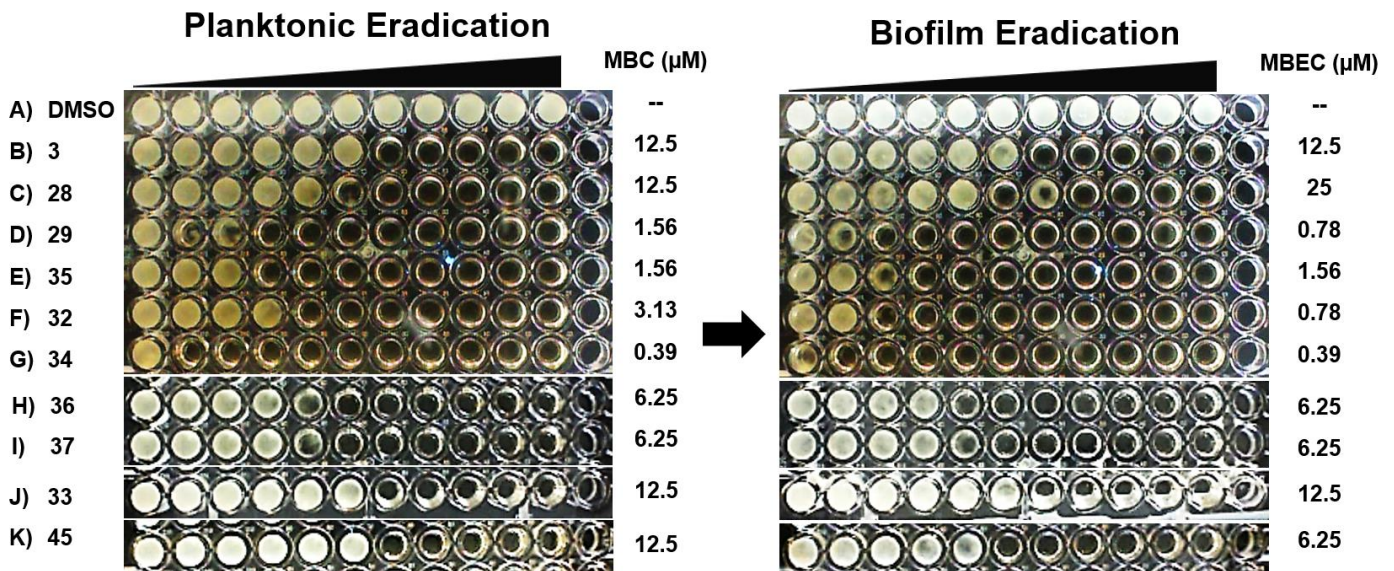

Test concentration: 0.2 – 200  $\mu\text{M}$

# VRE 700221

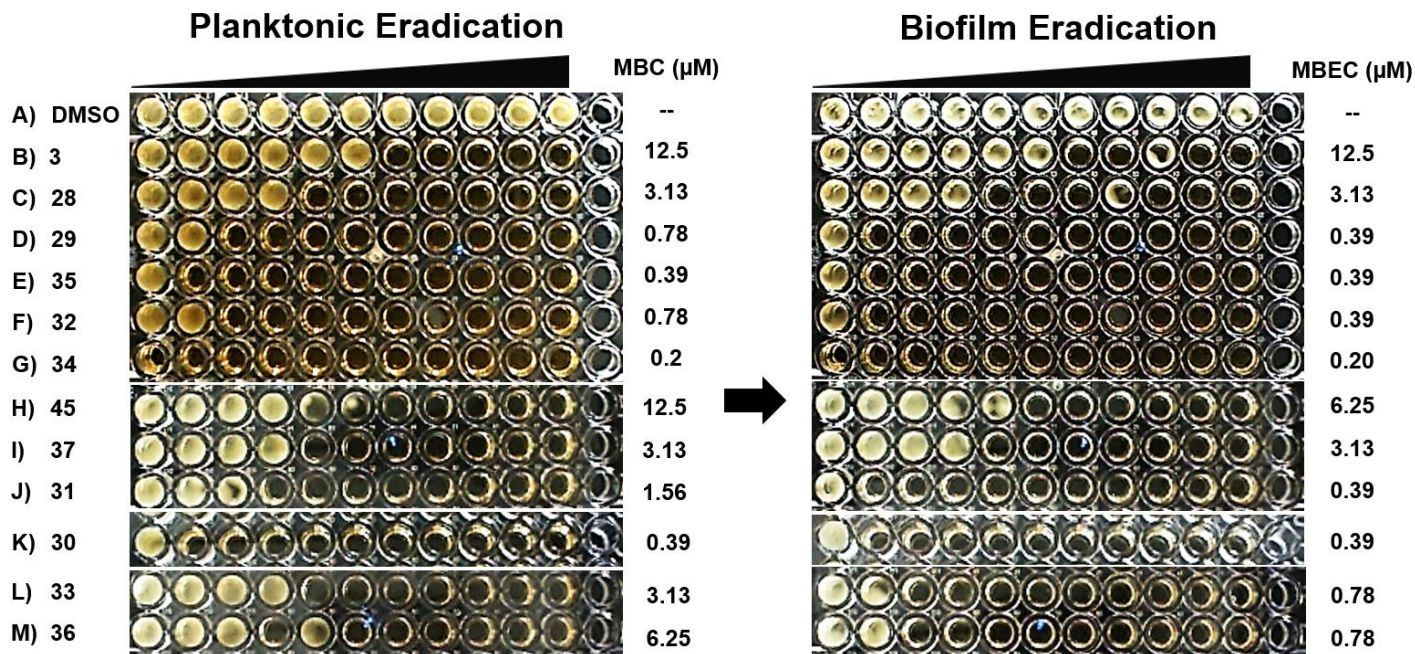

Test concentration: 0.2 – 200  $\mu\text{M}$

# *E. faecalis* OG1RF

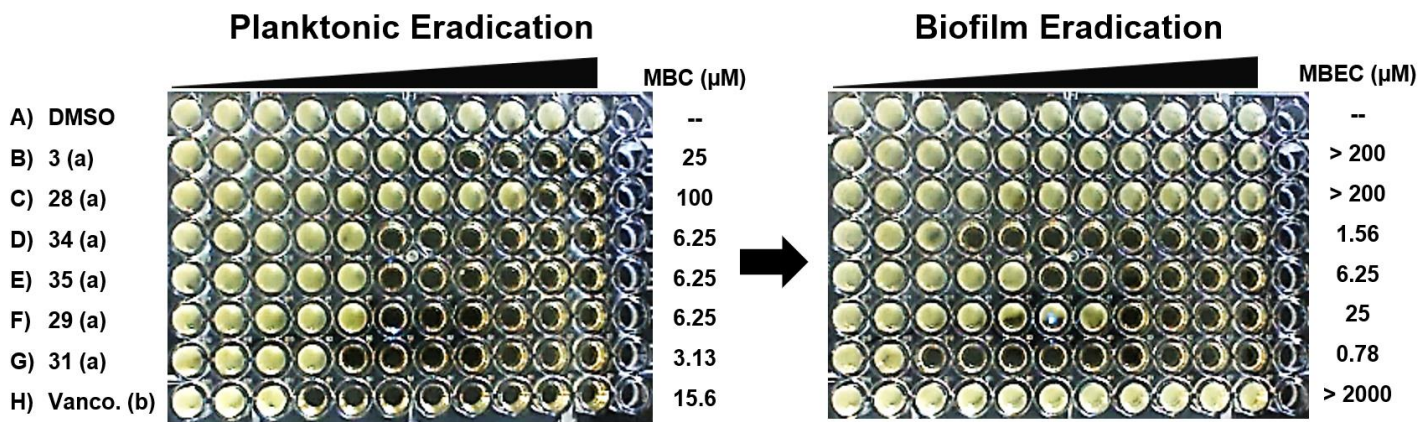

(a) Test concentration: 0.2 – 200  $\mu\text{M}$ ; (b) Test concentration: 2-2000  $\mu\text{M}$ ; Vanco. (Vancomycin).

## 11.) Iron Starvation in MRSA Biofilms via RT-qPCR.

Time course quality control data for biofilm experiments obtained from the Interdisciplinary Center for Biotechnology Research (ICBR) at the University of Florida.

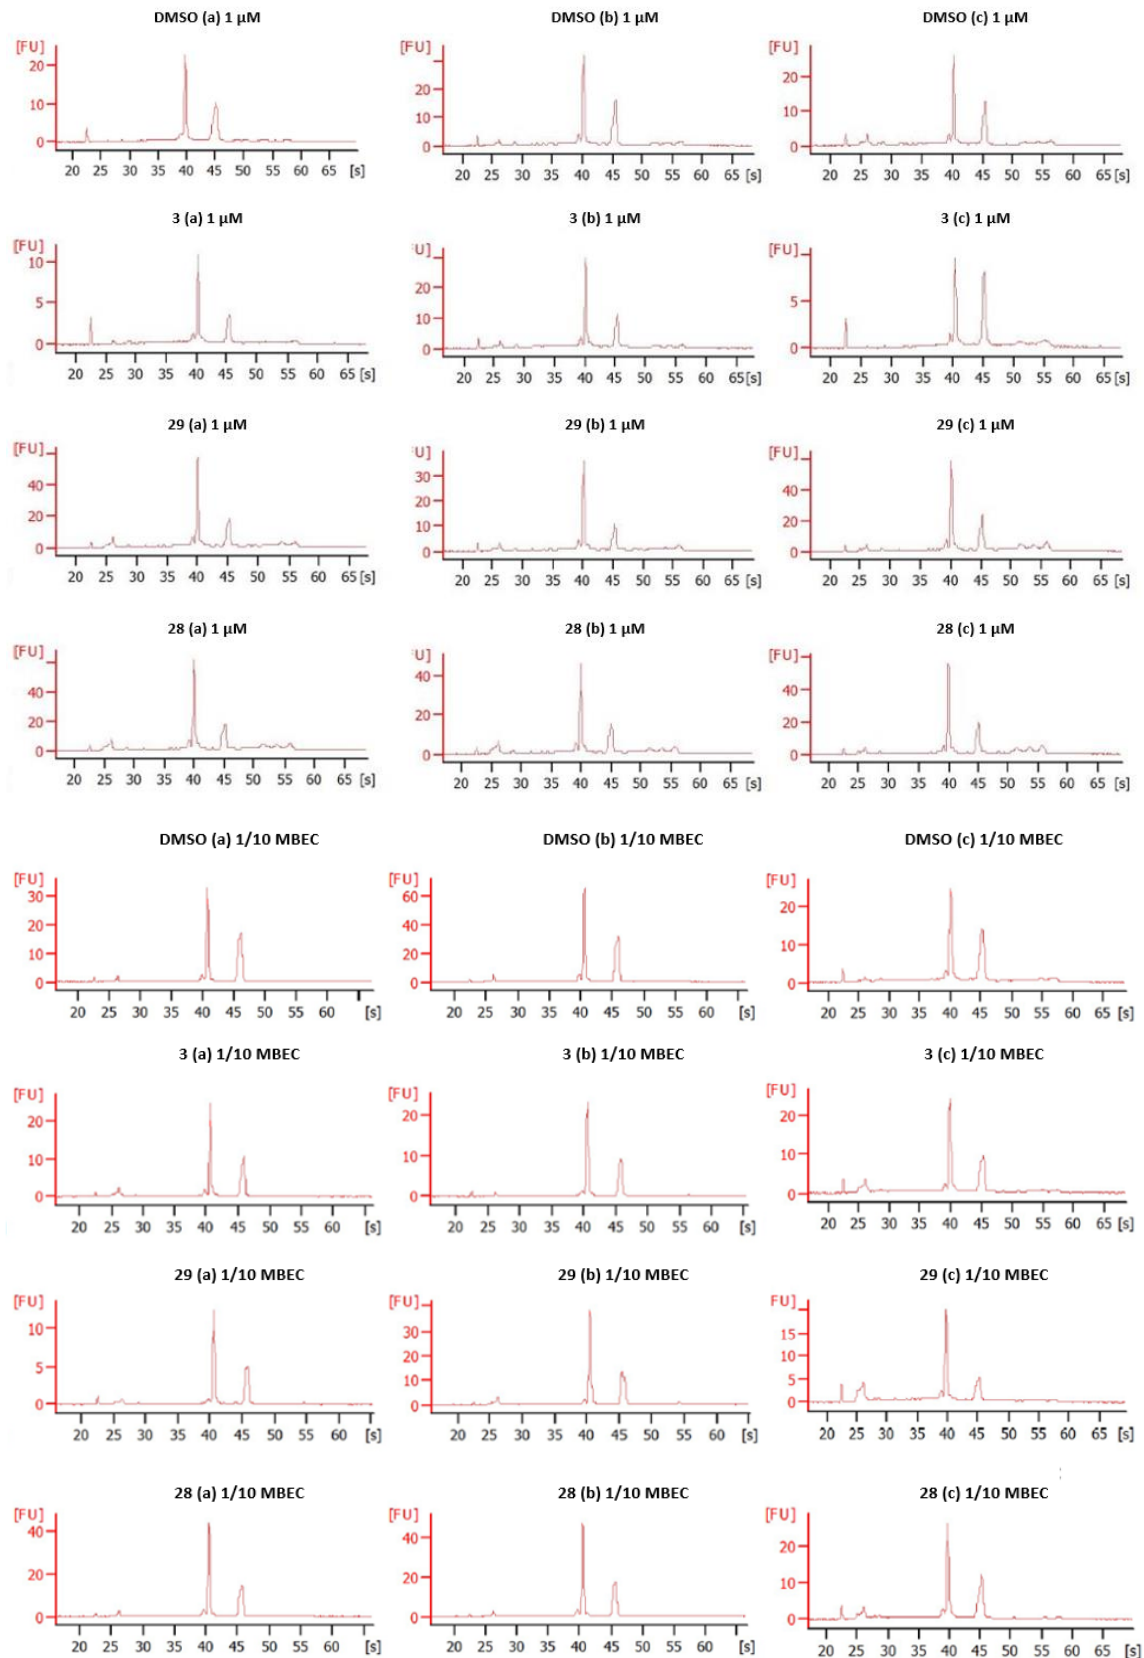

Time course RT-qPCR validation of MRSA-1707 biofilm upon treatment with **3**, **28**, and **29** at (A) 1  $\mu$ M, (B) 1/10 MBEC for 4 hours.

(A) MRSA-1707 biofilms treated with HPs at 1  $\mu$ M.

| Gene        | DMSO           | 3              | 28              | 29              | Gene Information / Function                                   |
|-------------|----------------|----------------|-----------------|-----------------|---------------------------------------------------------------|
|             | Mean $\pm$ SD  | Mean $\pm$ SD  | Mean $\pm$ SD   | Mean $\pm$ SD   |                                                               |
| <i>isdB</i> | 1.0 $\pm$ 0.02 | 5.3 $\pm$ 4.00 | 7.6 $\pm$ 2.13  | 7.0 $\pm$ 3.31  | hemoglobin receptor required for heme iron utilization        |
| <i>sbnC</i> | 1.0 $\pm$ 0.02 | 5.4 $\pm$ 1.85 | 10.8 $\pm$ 2.16 | 12.7 $\pm$ 2.98 | staphyloferrin B (siderophore) biosynthesis; iron acquisition |
| MW0695      | 1.0 $\pm$ 0.05 | 4.4 $\pm$ 3.10 | 6.1 $\pm$ 4.08  | 10.2 $\pm$ 4.99 | hypo. protein, similar to ferrichrome ABC transporters        |
| <i>sfaA</i> | 1.0 $\pm$ 0.02 | 3.4 $\pm$ 0.50 | 4.4 $\pm$ 0.48  | 3.9 $\pm$ 1.47  | staphyloferrin A (siderophore); iron acquisition              |

(B) MRSA-1707 biofilms treated with HPs at 1/10 MBEC.

| Gene        | DMSO           | 3               | 28              | 29              | Gene Information / Function                                   |
|-------------|----------------|-----------------|-----------------|-----------------|---------------------------------------------------------------|
|             | Mean $\pm$ SD  | Mean $\pm$ SD   | Mean $\pm$ SD   | Mean $\pm$ SD   |                                                               |
| <i>isdB</i> | 1.0 $\pm$ 0.01 | 7.3 $\pm$ 1.70  | 14.4 $\pm$ 5.73 | 8.6 $\pm$ 2.04  | hemoglobin receptor required for heme iron utilization        |
| <i>sbnC</i> | 1.1 $\pm$ 0.08 | 15.5 $\pm$ 4.35 | 14.1 $\pm$ 5.86 | 15.3 $\pm$ 4.82 | staphyloferrin B (siderophore) biosynthesis; iron acquisition |
| MW0695      | 1.0 $\pm$ 0.04 | 1.9 $\pm$ 0.66  | 2.4 $\pm$ 1.84  | 1.9 $\pm$ 0.87  | hypo. protein, similar to ferrichrome ABC transporters        |
| <i>sfaA</i> | 1.0 $\pm$ 0.02 | 3.2 $\pm$ 1.06  | 2.9 $\pm$ 1.45  | 3.5 $\pm$ 2.66  | staphyloferrin A (siderophore); iron acquisition              |

Primers used for qPCR validation experiments.

| Gene   | Symbol      | Forward primer       | Reverse primer         |
|--------|-------------|----------------------|------------------------|
| MW0091 | <i>sbnC</i> | TCCGGTACATCCTTGGCAAT | GACATGGTTATACGGTGCGC   |
| MW1011 | <i>isdB</i> | CCAGCAGCAAAGCCACTAA  | CGAGAGTTTGGTGCGCTATG   |
| MW0695 | n.a.        | CTGGAACGATGGAATGGGCT | CGTGCGCAATGAGATGAAGG   |
| MW2106 | <i>sfaA</i> | GACGATGTGTGCCATTGGTG | TTGTTCGTACGTGCCCATTTGA |
| MW1668 | <i>ptaA</i> | TCCTAGCGAGTTCAGTTGCA | CCAATGGAATGTAGCTGCGA   |

**Notes:** Primers were designed using OligoPerfect Primer Designer (Thermofisher). During these studies, *ptaA* was used as the housekeeping gene for MRSA-1707 (*S. aureus* MW2) biofilms.

Materials used added to a 1.5 mL Eppendorf tube on ice.

| Material              | Amount / Reaction (20 $\mu$ L) | Triplicate + Excess (88 $\mu$ L) |
|-----------------------|--------------------------------|----------------------------------|
| SYBR                  | 10 $\mu$ L                     | 44 $\mu$ L                       |
| Primer (5 nM)_forward | 1.5 $\mu$ L                    | 6.5 $\mu$ L                      |
| Primer (5 nM)_reverse | 1.5 $\mu$ L                    | 6.5 $\mu$ L                      |
| Rt enzyme             | 0.16 $\mu$ L                   | 0.704 $\mu$ L                    |
| RNA                   | 30 ng                          | 132 ng                           |
| Water                 | 20 $\mu$ L                     | 88 $\mu$ L                       |

Summary of the RNA concentrations and the RIN (RNA Integrity Number) numbers obtained from the RNA samples (independent experiments) isolated from MRSA-1707 biofilms.

| Sample        | 1 $\mu$ M      |     | 1/10 MBEC      |      |
|---------------|----------------|-----|----------------|------|
|               | [ng / $\mu$ L] | RIN | [ng / $\mu$ L] | RIN  |
| DMSO (a)      | 133.8          | 8.6 | 141.467        | 9.0  |
| DMSO (b)      | 135.64         | 8.3 | 193.387        | 10.0 |
| DMSO (c)      | 97.64          | 8.3 | 135            | 8.2  |
| <b>3</b> (a)  | 52.84          | 7.7 | 112.507        | 9.0  |
| <b>3</b> (b)  | 186.52         | 7.9 | 93.467         | 9.0  |
| <b>3</b> (c)  | 78.2           | 8.8 | 116.68         | 8.1  |
| <b>29</b> (a) | 231.24         | 8.3 | 40.587         | 9.0  |
| <b>29</b> (b) | 214.68         | 8.0 | 121.707        | 10.0 |
| <b>29</b> (c) | 319.08         | 8.5 | 102.76         | 7.4  |
| <b>28</b> (a) | 324.92         | 8.3 | 146.667        | 9.0  |
| <b>28</b> (b) | 260.52         | 8.2 | 149.467        | 9.0  |
| <b>28</b> (c) | 236.2          | 8.7 | 111.32         | 8.2  |

Data obtained from the Interdisciplinary Center for Biotechnology Research (ICBR) at the University of Florida.

## 12.) HeLa Cytotoxicity: LDH Release Results.

HP analogues demonstrate low levels of cytotoxicity against HeLa cells at 100  $\mu$ M.

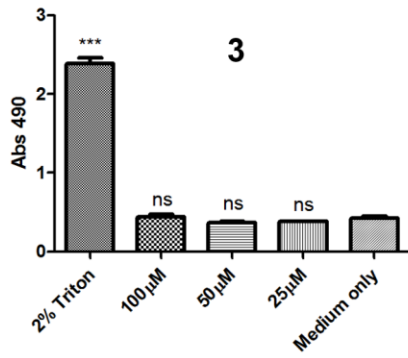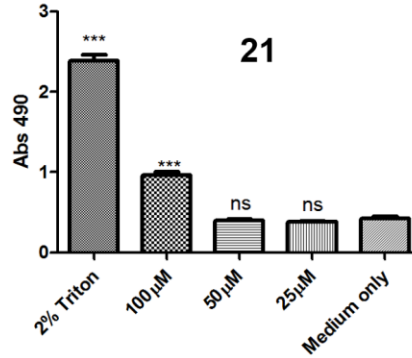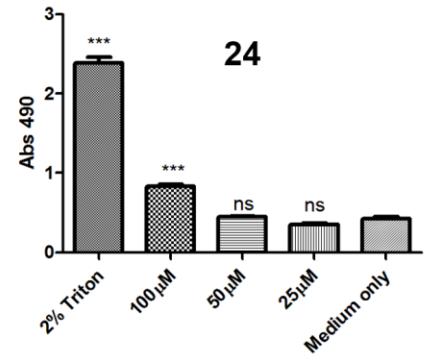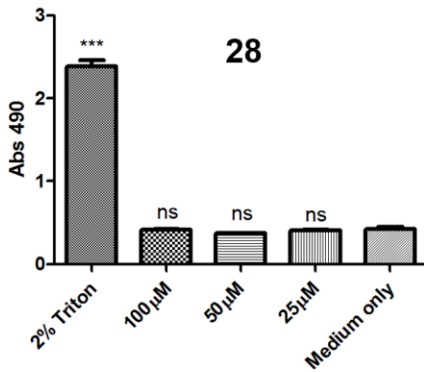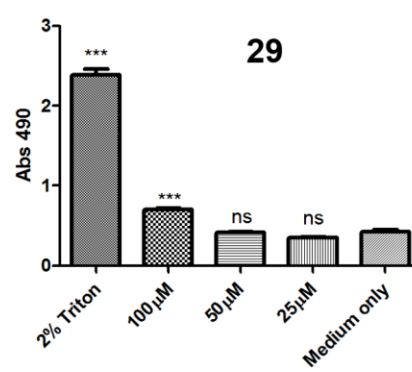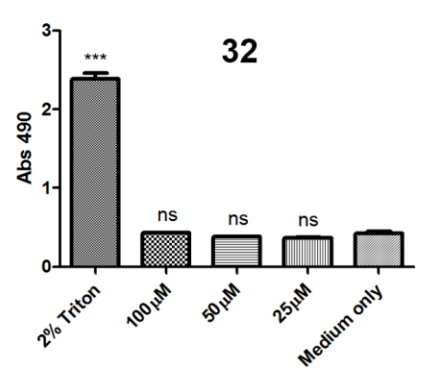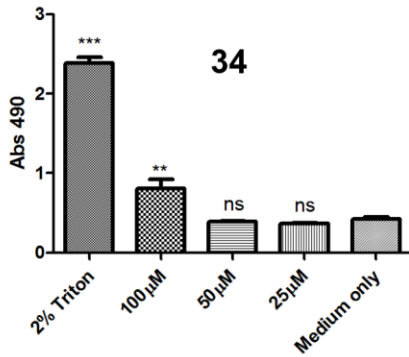

Key: Triton-X = 100% cell death; Medium Only = 0% cell death.

13.) HEK-293 Cytotoxicity of HP 29.

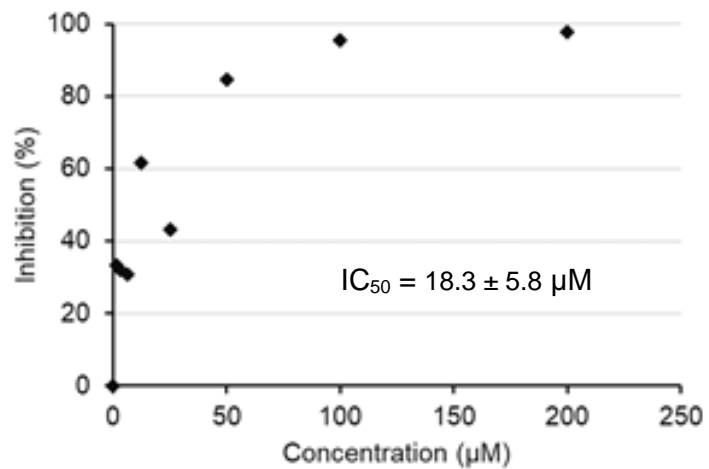

## 14.) pKa Value Determination for Select HPs.

pH-Dependent spectral scan of HPs in buffer; normalized plot of absorbance vs. pH for protonated (HA) and deprotonated (A<sup>-</sup>) HPs and plot of pH versus log[A<sup>-</sup>/HA] for HPs. A linear regression line is shown with a Y-intercept corresponding to a calculated pKa value.

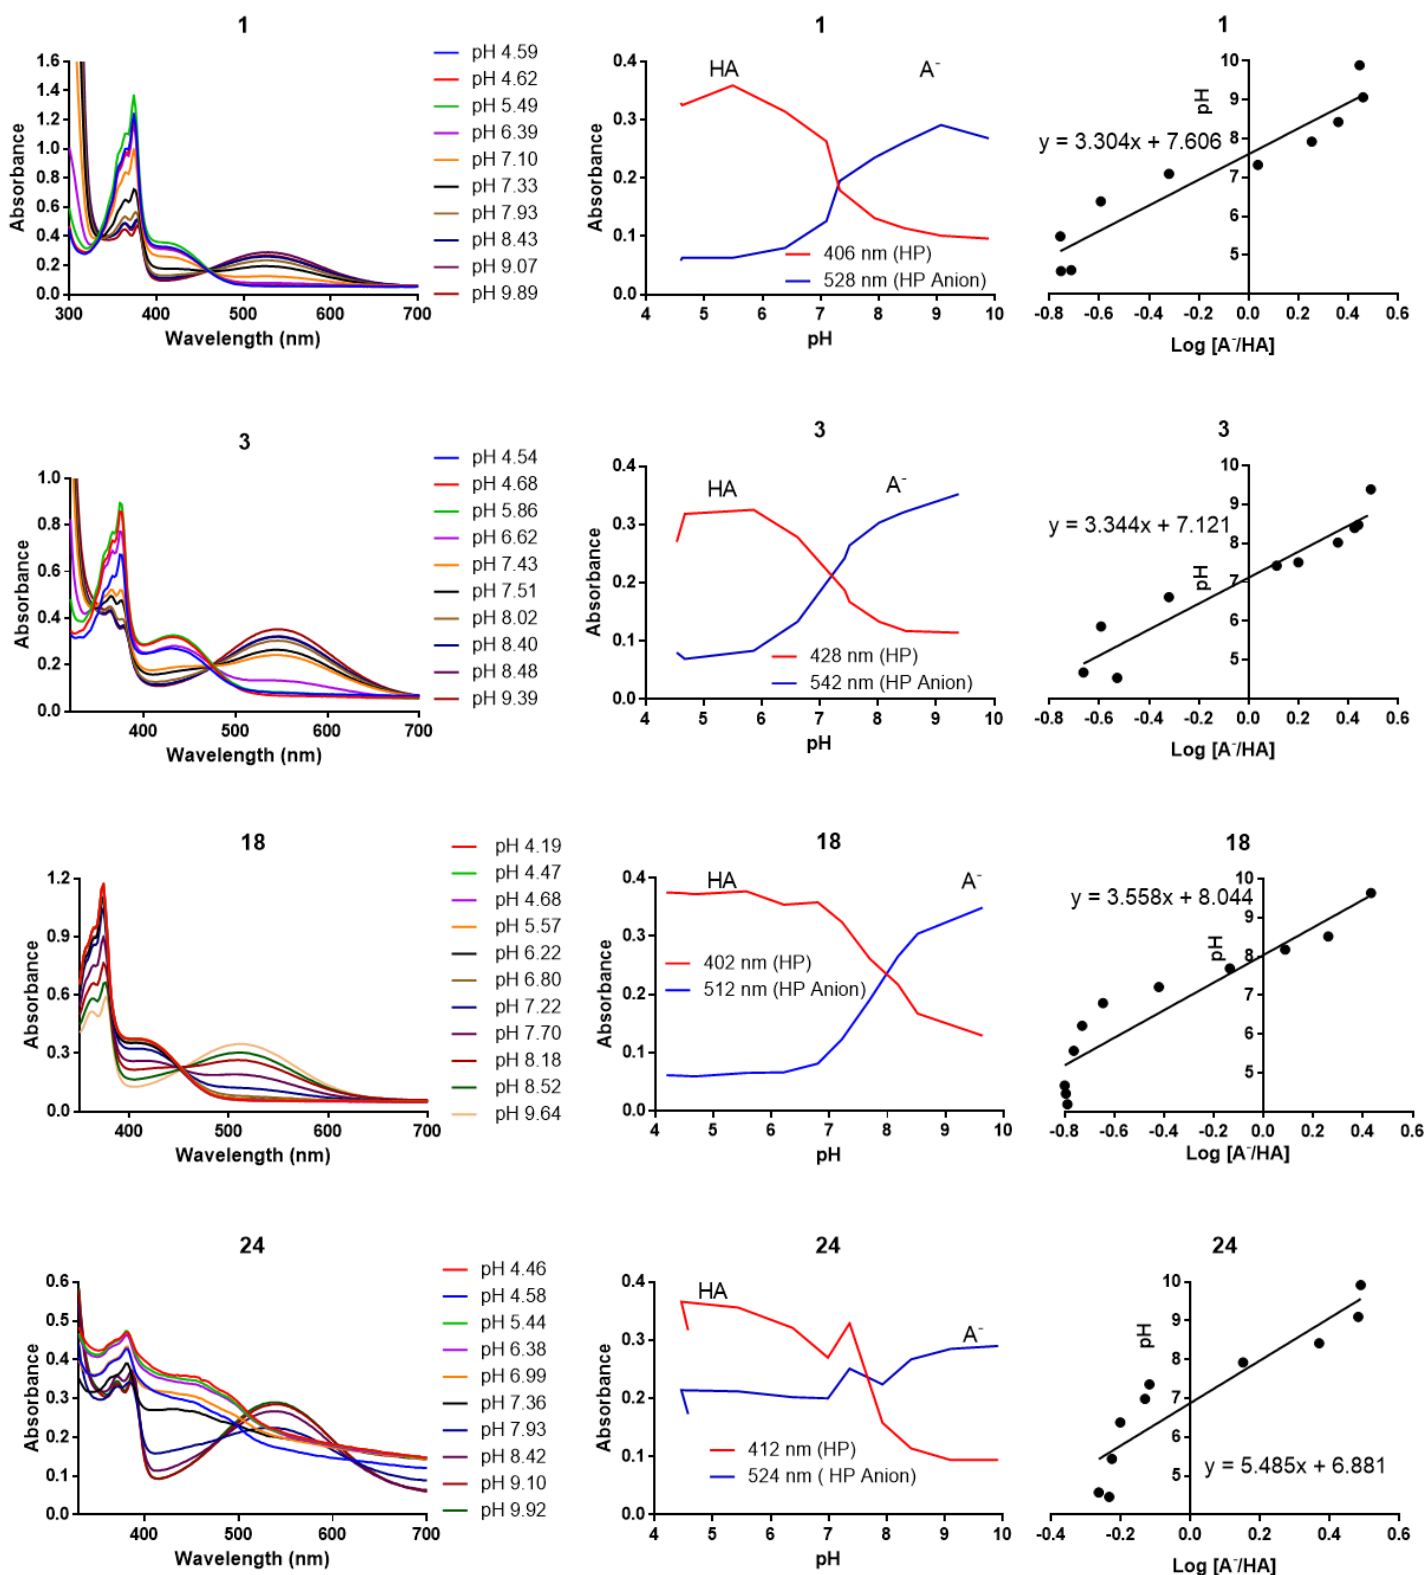



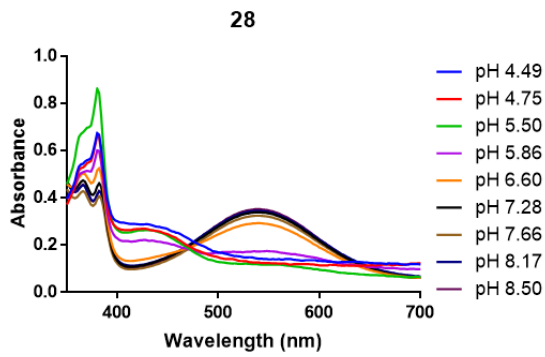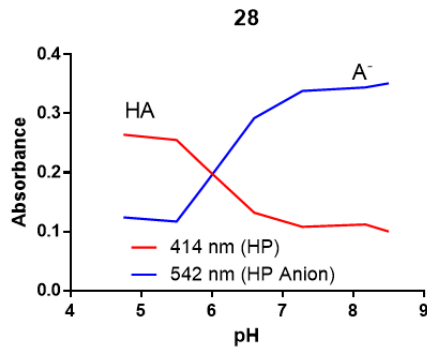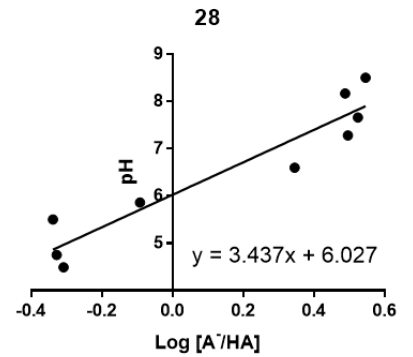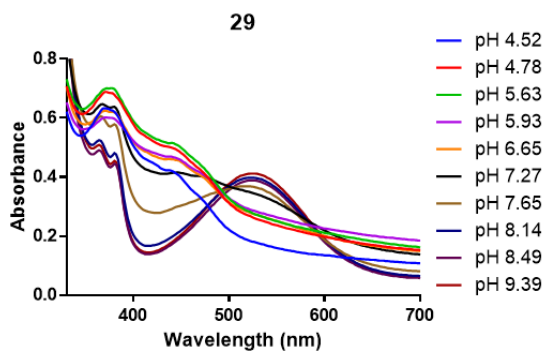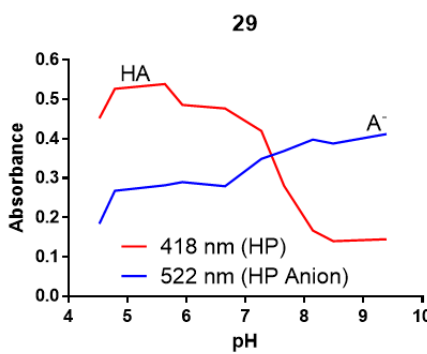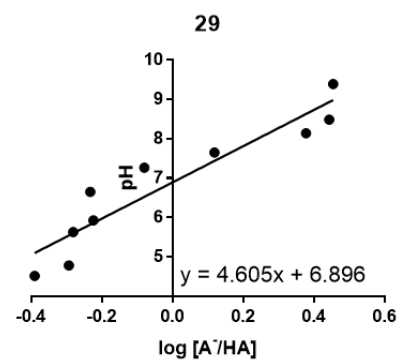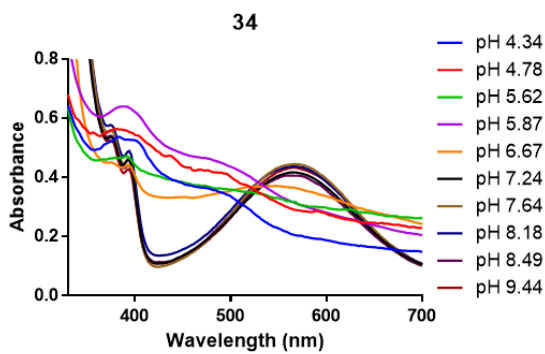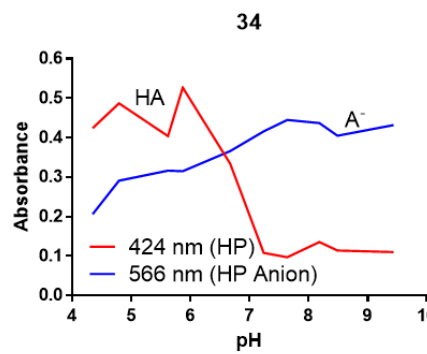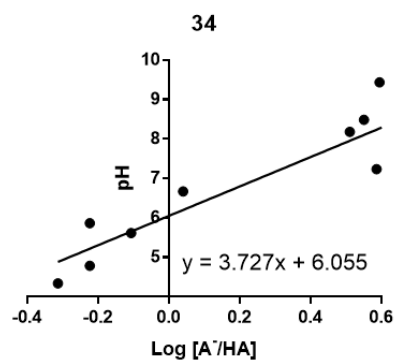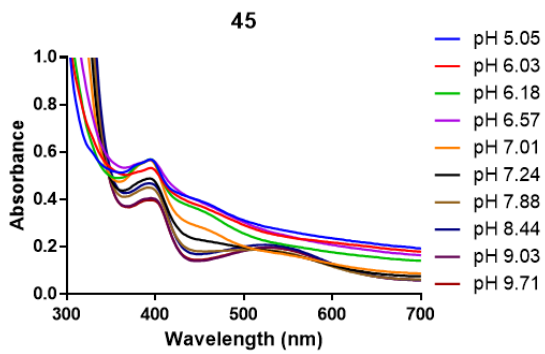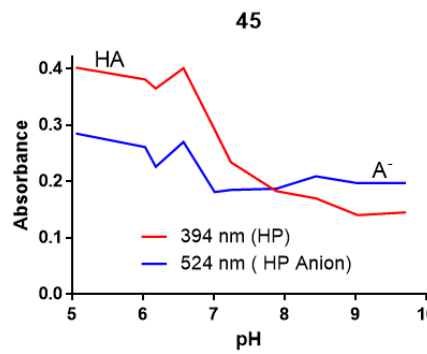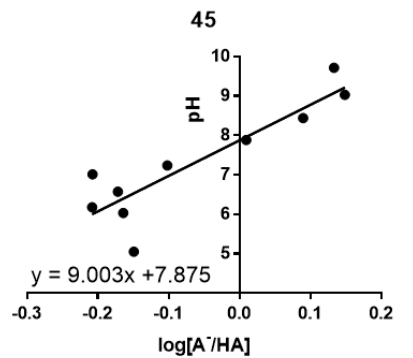

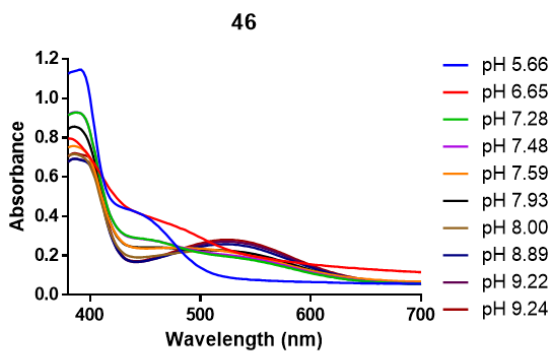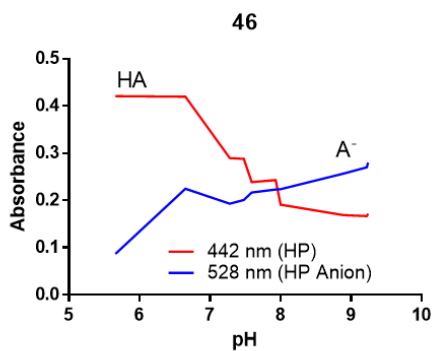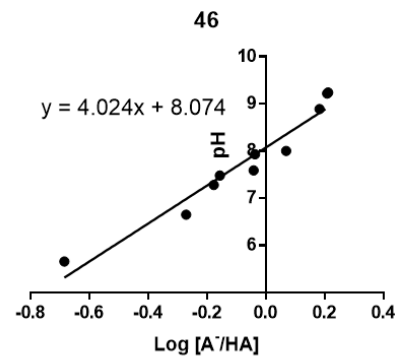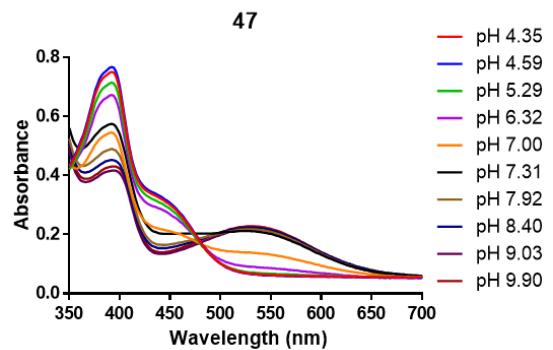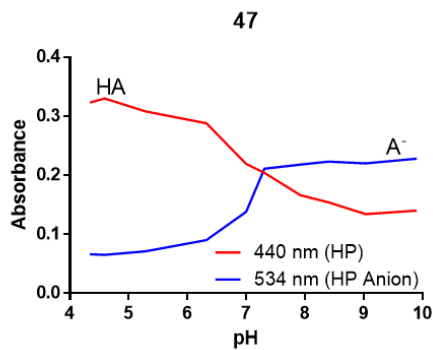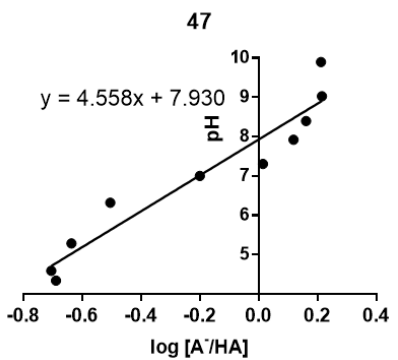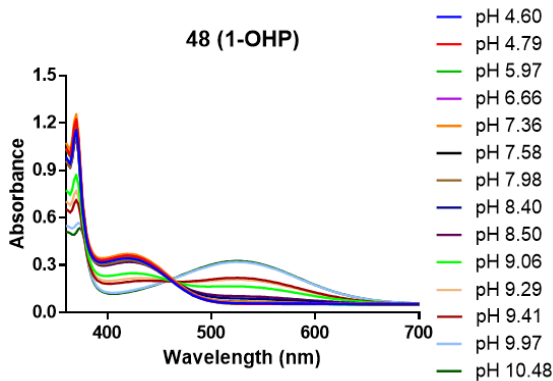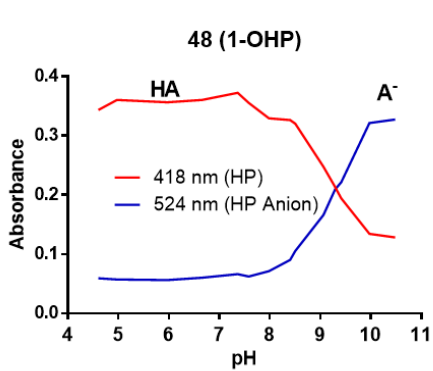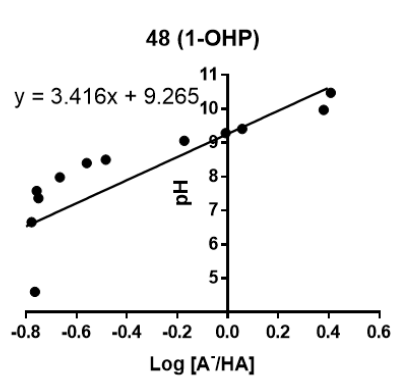

## 15.) Compound Purity Analysis.

Each HPLC experiment to determine the purity of halogenated phenazine analogues was carried out over 20 minutes. The purity of each compound was determined following the characterization via  $^1\text{H}/^{13}\text{C}$  NMR, HRMS and melting point analysis. A blank methanol run is shown below and used to remove background noise from the purity assessment of each compound. Overall, the purity range from these experiments was found to be 95.5 to >99.9% pure based on LC traces.

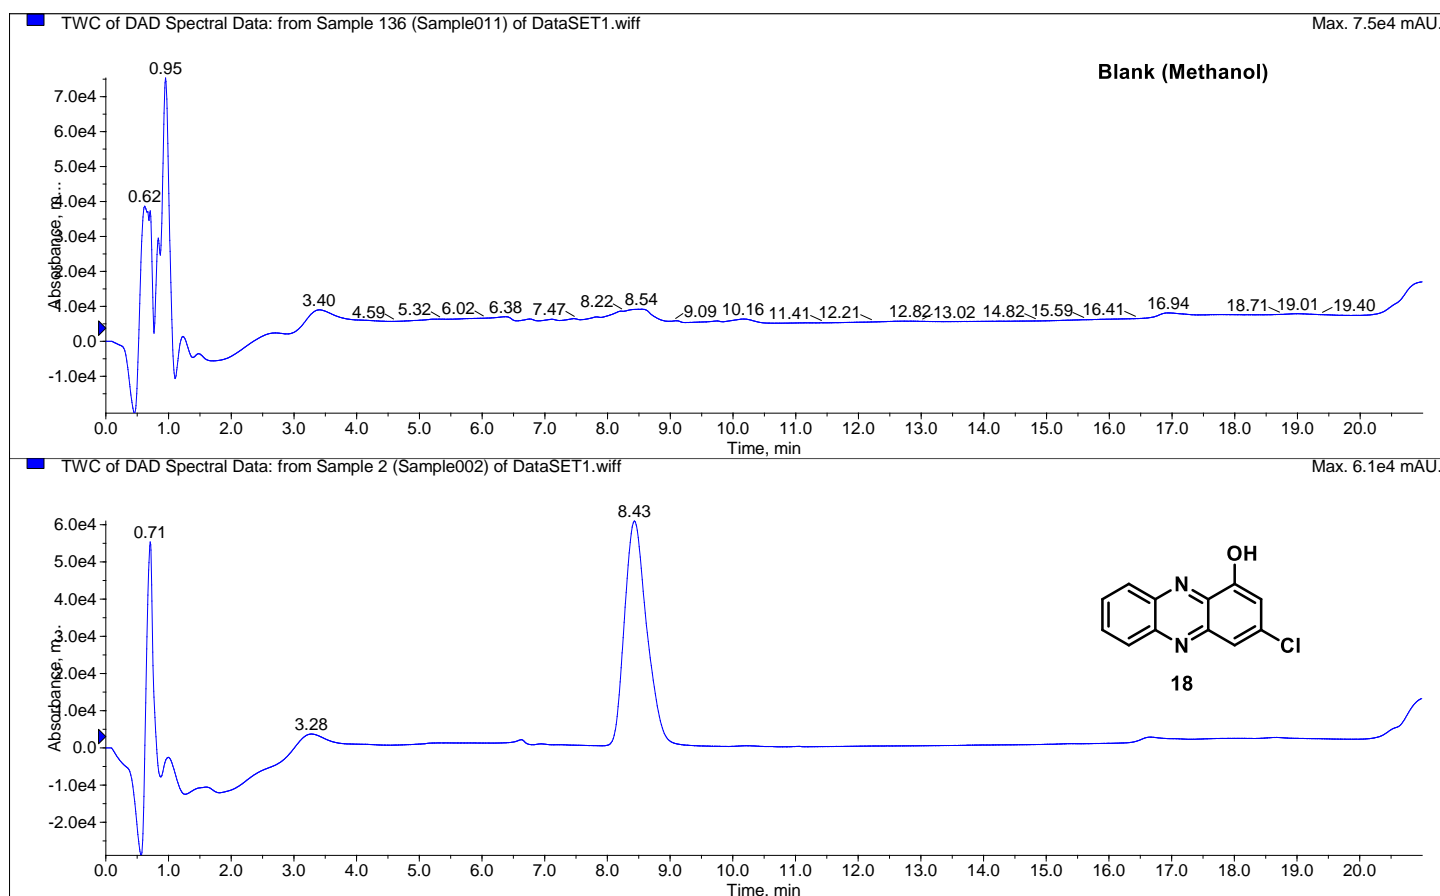

| Retention Time (Min) | Peak Area      |
|----------------------|----------------|
| 6.63                 | 17500          |
| 6.95                 | 2034           |
| 8.43 (18)            | 1480000        |
| <b>Sum of Area</b>   | <b>1499534</b> |
| <b>% Purity</b>      | <b>98.7%</b>   |

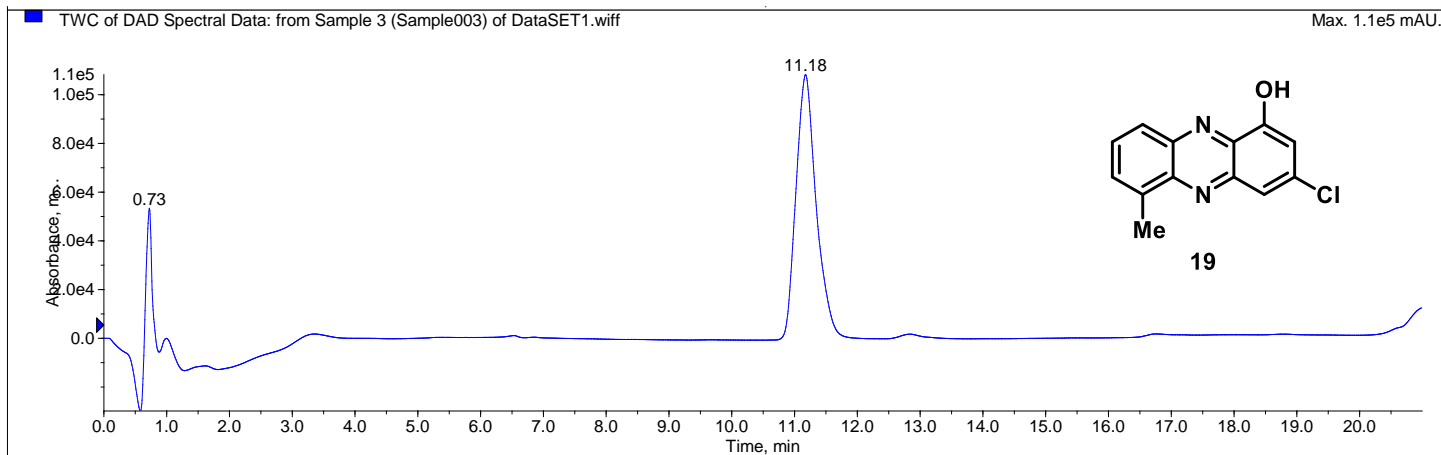

| Retention Time (Min) | Peak Area      |
|----------------------|----------------|
| 6.53                 | 11800          |
| 11.18 (19)           | 2440000        |
| 12.84                | 44300          |
| <b>Sum of Area</b>   | <b>2496100</b> |
| <b>% Purity</b>      | <b>97.8%</b>   |

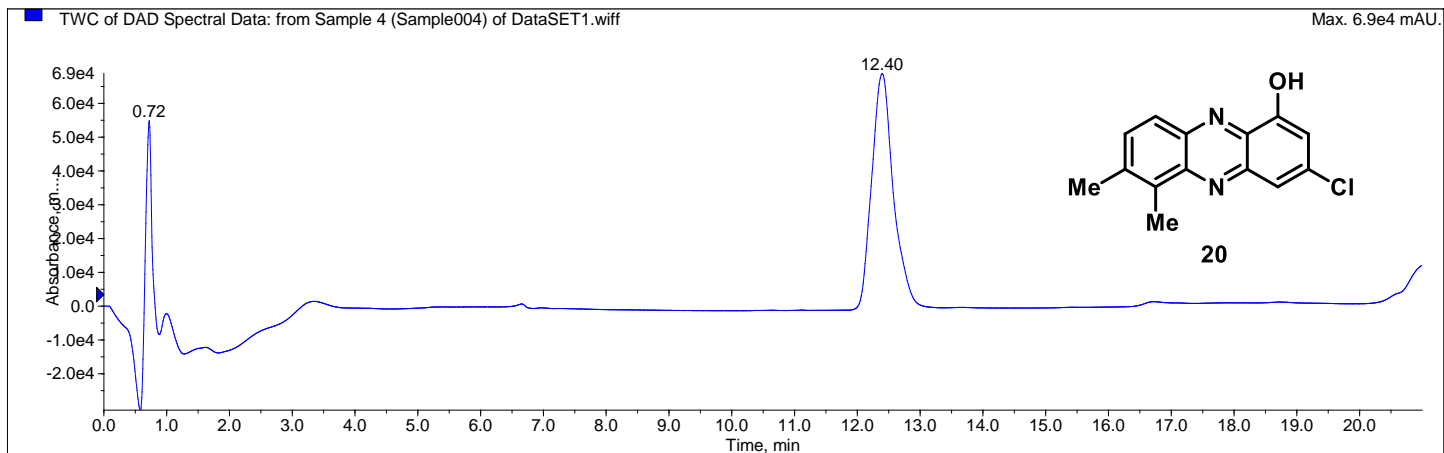

| Retention Time (Min) | Peak Area    |
|----------------------|--------------|
| 6.65                 | 15800        |
| 12.40 ( <b>20</b> )  | 1670000      |
| <b>Sum of Area</b>   | 1685800      |
| <b>% Purity</b>      | <b>99.1%</b> |

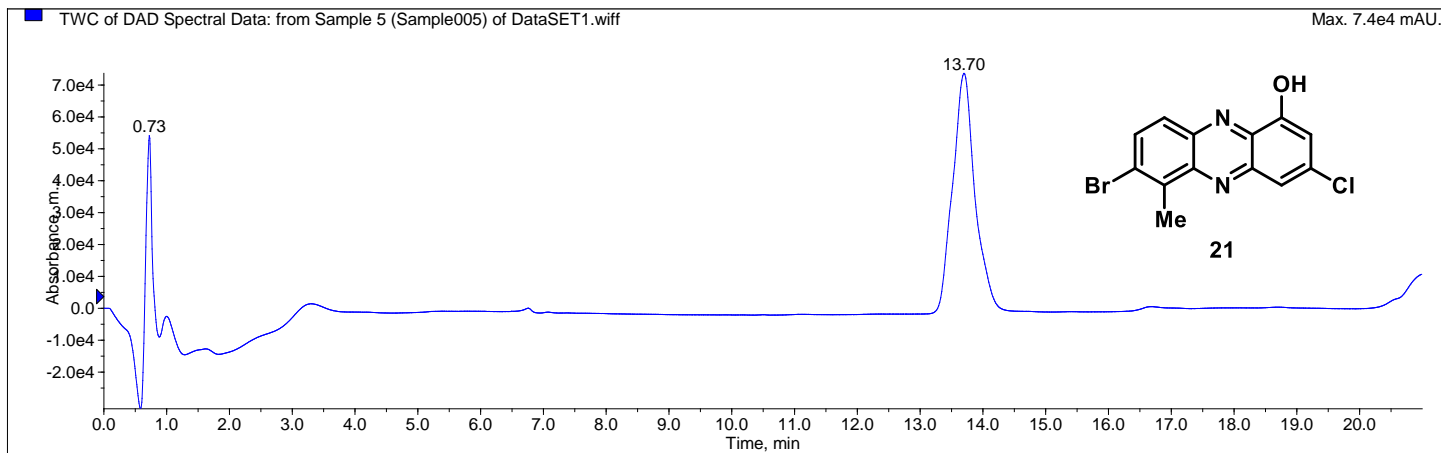

| Retention Time (Min) | Peak Area      |
|----------------------|----------------|
| 6.76                 | 13800          |
| 13.70 (21)           | 1850000        |
| <b>Sum of Area</b>   | <b>1863800</b> |
| <b>% Purity</b>      | <b>99.3%</b>   |

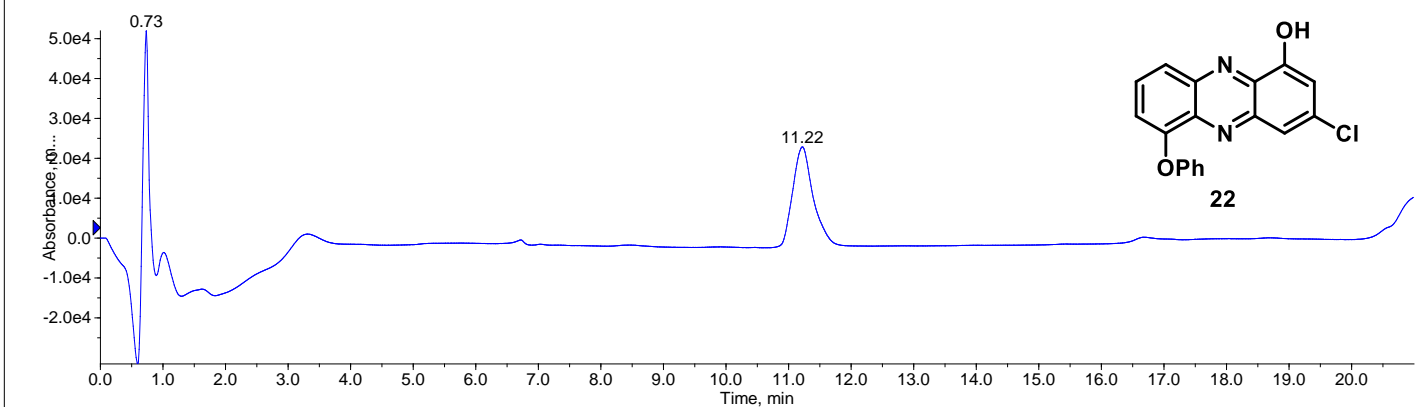

| Retention Time (Min) | Peak Area     |
|----------------------|---------------|
| 6.71                 | 13200         |
| 7.03                 | 1806          |
| 11.22 (22)           | 571000        |
| <b>Sum of Area</b>   | <b>586006</b> |
| <b>% Purity</b>      | <b>97.4%</b>  |

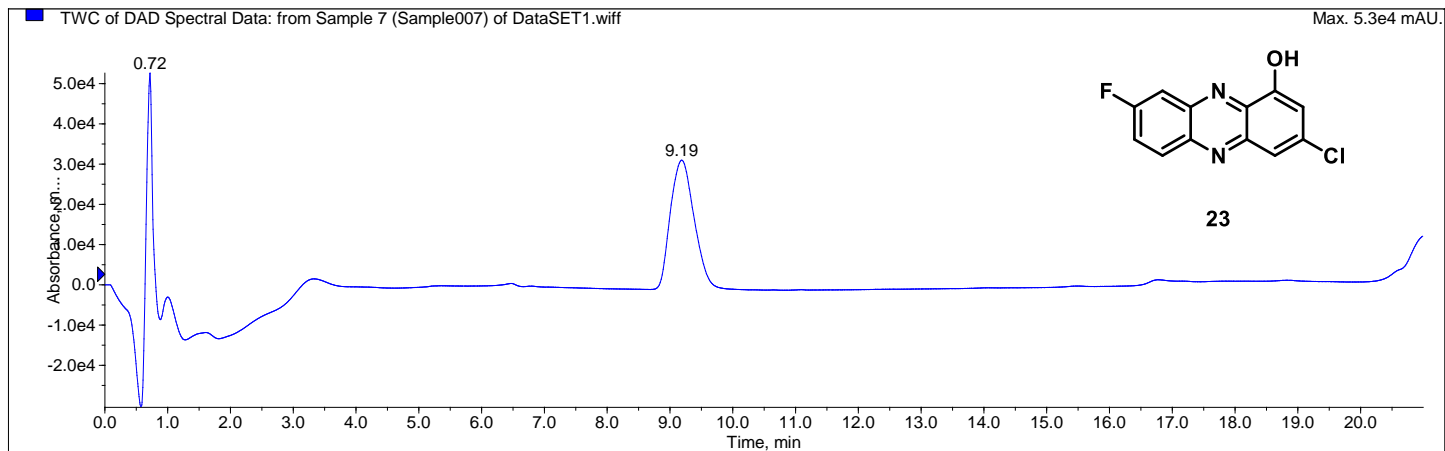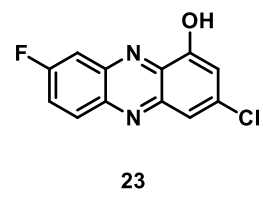

| Retention Time (Min) | Peak Area        |
|----------------------|------------------|
| 9.19 (23)            | 842000           |
| 10.31                | 147              |
| <b>Sum of Area</b>   | <b>842147</b>    |
| <b>% Purity</b>      | <b>&gt;99.9%</b> |



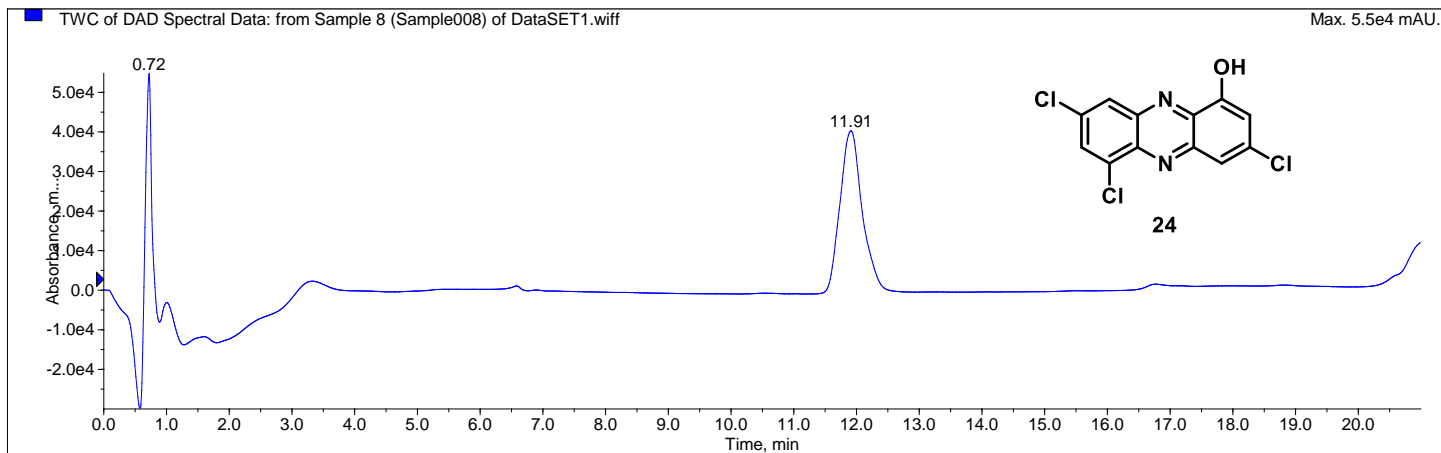

| Retention Time (Min) | Peak Area      |
|----------------------|----------------|
| 6.58                 | 17000          |
| 6.90                 | 1888           |
| 10.62                | 5083           |
| 11.91 (24)           | 1010000        |
| 15.52                | 367            |
| <b>Sum of Area</b>   | <b>1034338</b> |
| <b>% Purity</b>      | <b>97.6%</b>   |

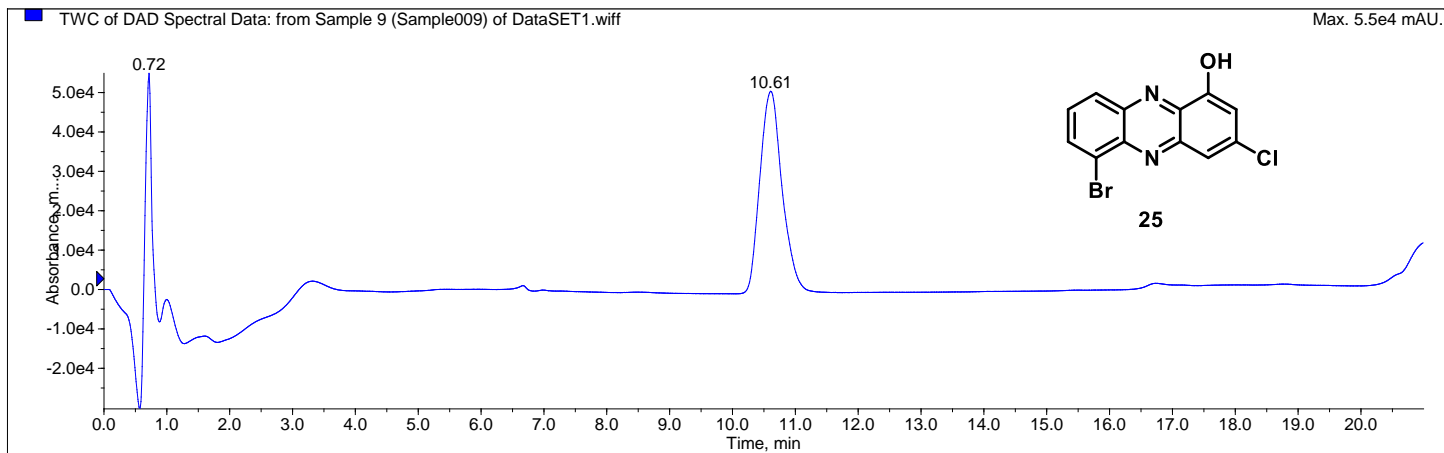

| Retention Time (Min) | Peak Area      |
|----------------------|----------------|
| 6.67                 | 20400          |
| 6.99                 | 2430           |
| 10.61 (25)           | 1250000        |
| 17.98                | 256            |
| <b>Sum of Area</b>   | <b>1273086</b> |
| <b>% Purity</b>      | <b>98.2%</b>   |

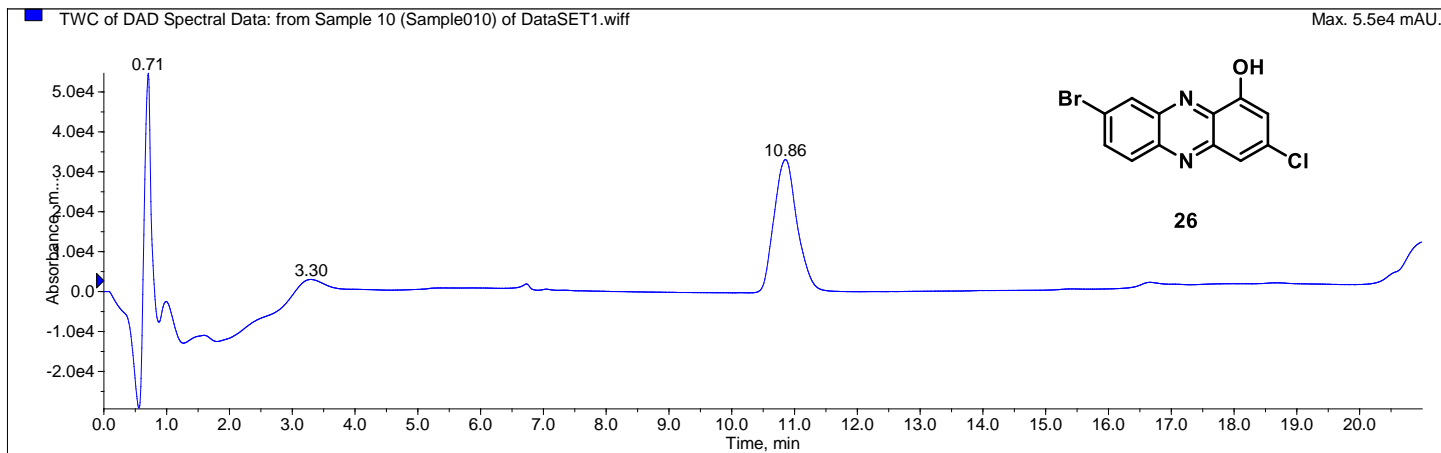

| Retention Time (Min) | Peak Area    |
|----------------------|--------------|
| 6.73                 | 14000        |
| 7.04                 | 2179         |
| 10.86 ( <b>26</b> )  | 847000       |
| <b>Sum of Area</b>   | 863179       |
| <b>% Purity</b>      | <b>98.1%</b> |

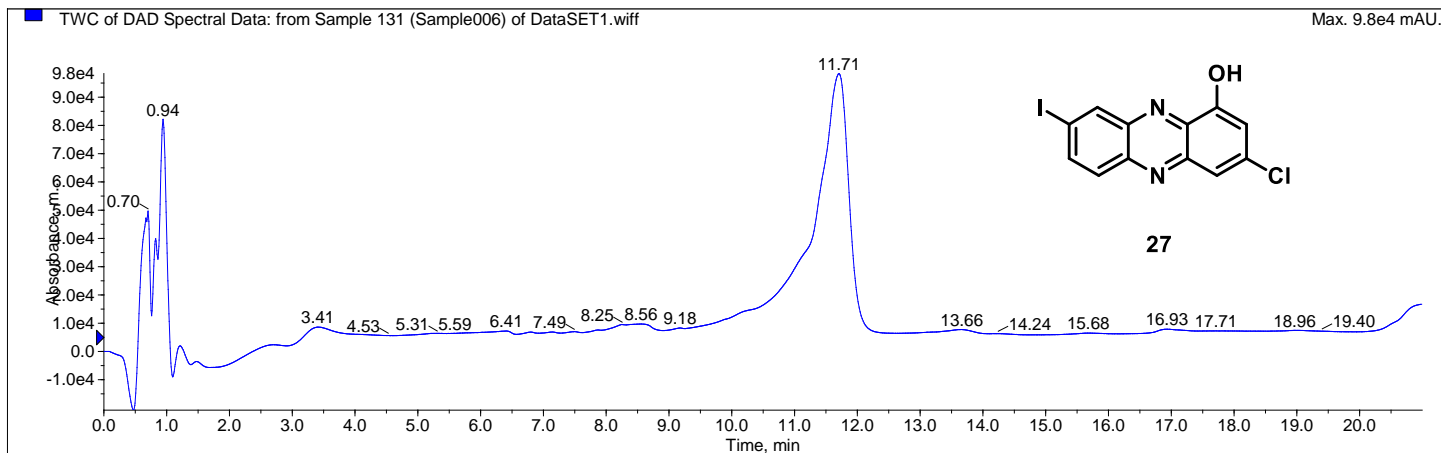

| Retention Time (Min) | Peak Area      |
|----------------------|----------------|
| 6.41                 | 32600          |
| 6.80                 | 4841           |
| 9.18                 | 3346           |
| 11.71 ( <b>27</b> )  | 3800000        |
| 13.67                | 40300          |
| <b>Sum of Area</b>   | <b>3881087</b> |
| <b>% Purity</b>      | <b>97.9%</b>   |

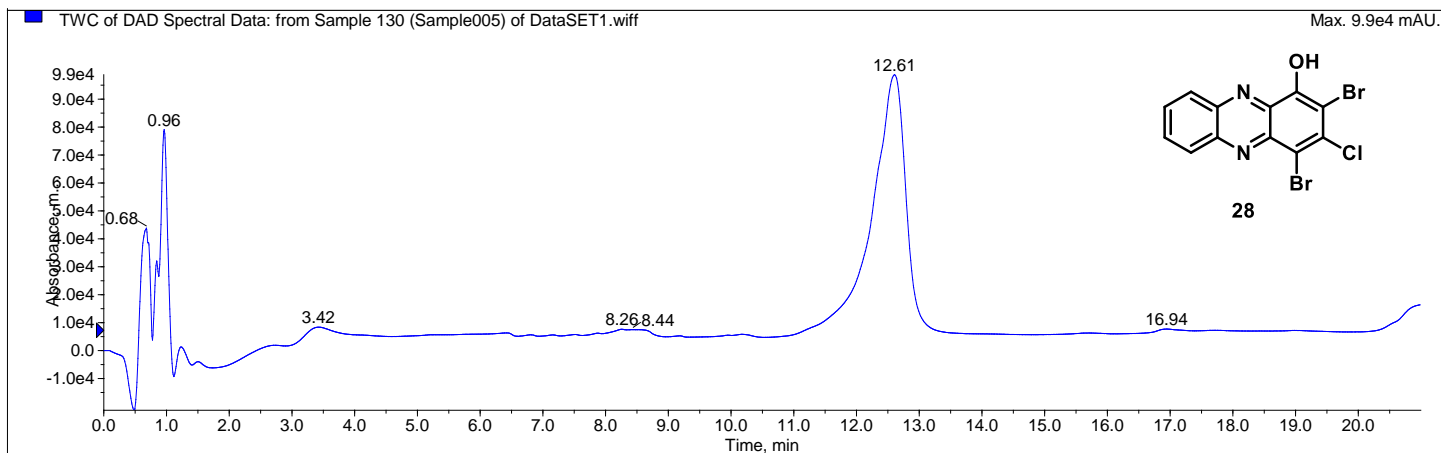

| Retention Time (Min) | Peak Area      |
|----------------------|----------------|
| 12.61( <b>28</b> )   | 3530000        |
| 15.67                | 6526           |
| 17.72                | 10003          |
| <b>Sum of Area</b>   | <b>3546529</b> |
| <b>% Purity</b>      | <b>99.5%</b>   |

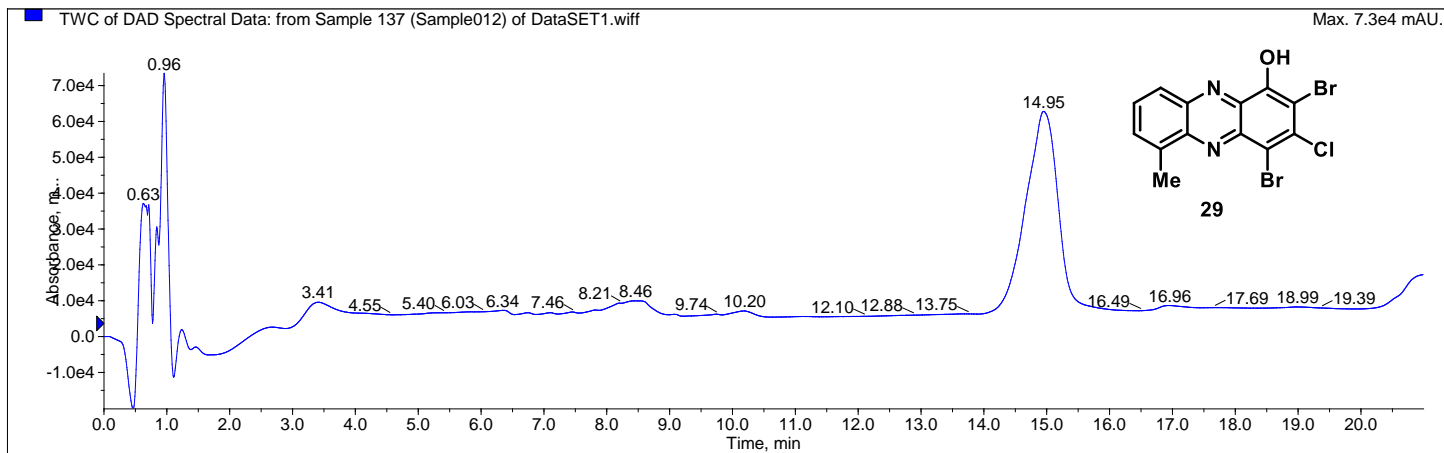

| Retention Time (Min) | Peak Area      |
|----------------------|----------------|
| 6.28                 | 24300          |
| 11.19                | 337            |
| 14.95 (29)           | 1960000        |
| <b>Sum of Area</b>   | <b>1984637</b> |
| <b>% Purity</b>      | <b>98.8%</b>   |

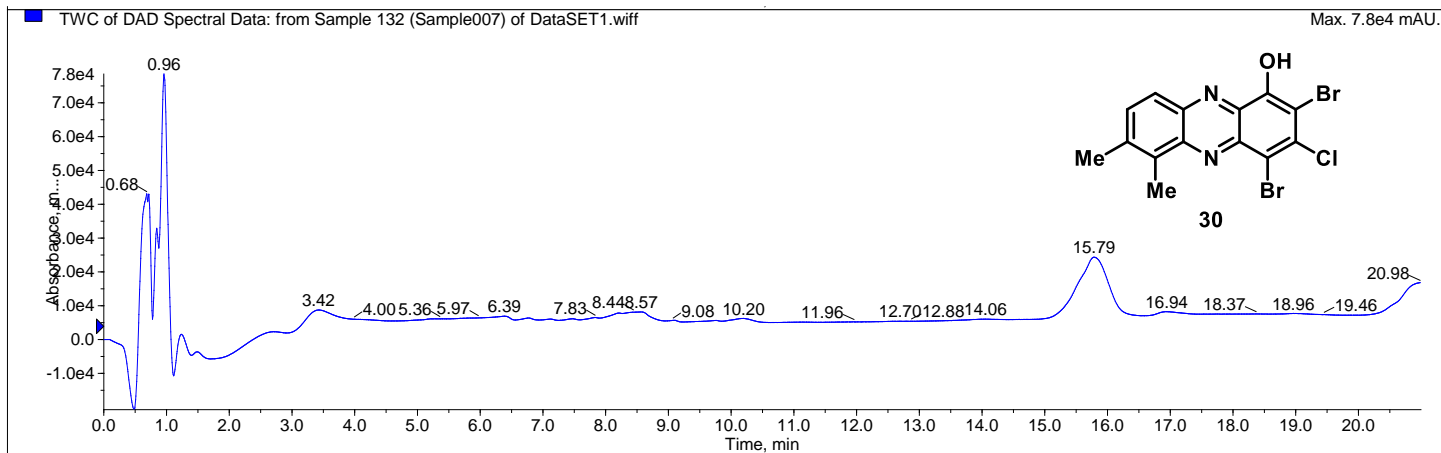

| Retention Time (Min) | Peak Area     |
|----------------------|---------------|
| 6.39                 | 22700         |
| 6.76                 | 5874          |
| 15.79 (30)           | 601000        |
| <b>Sum of Area</b>   | <b>629574</b> |
| <b>% Purity</b>      | <b>95.5%</b>  |

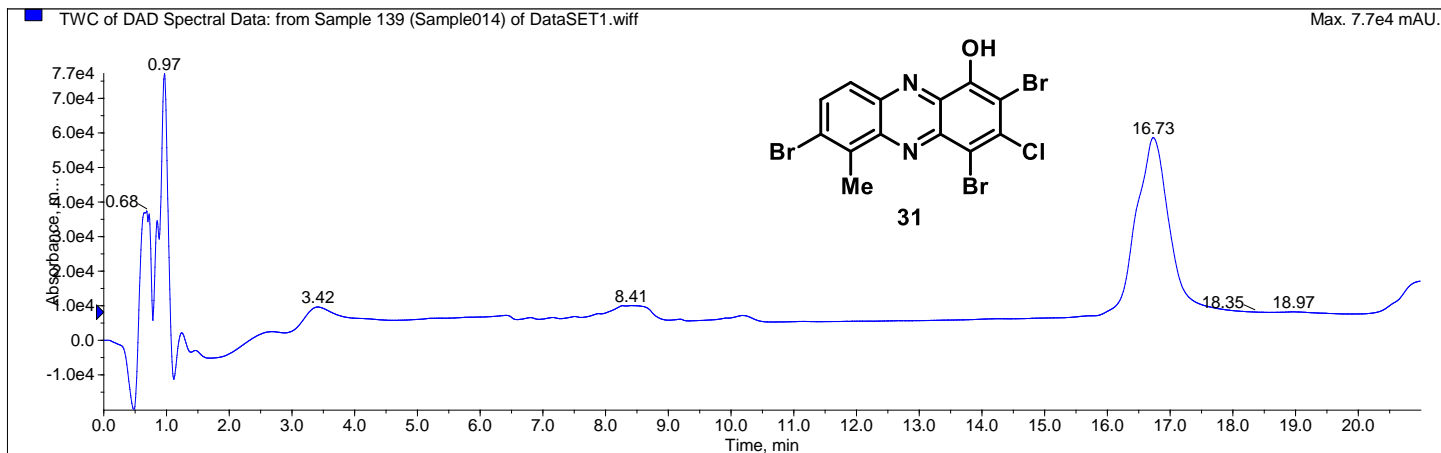

| Retention Time (Min) | Peak Area        |
|----------------------|------------------|
| 12.24                | 727              |
| 14.25                | 488              |
| 16.73 (31)           | 1810000          |
| 18.35                | 6                |
| <b>Sum of Area</b>   | <b>1811221</b>   |
| <b>% Purity</b>      | <b>&gt;99.9%</b> |



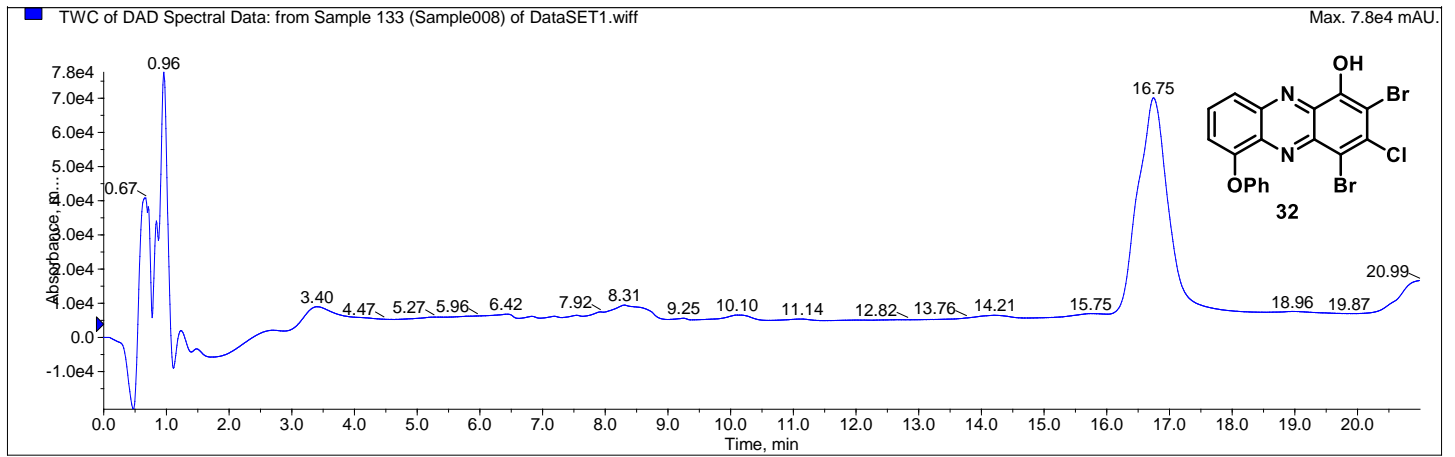

| Retention Time (Min) | Peak Area      |
|----------------------|----------------|
| 11.14                | 8699           |
| 13.76                | 499            |
| 14.21                | 27200          |
| 15.75                | 2104           |
| 16.75 (32)           | 2030000        |
| <b>Sum of Area</b>   | <b>2068502</b> |
| <b>% Purity</b>      | <b>98.1%</b>   |

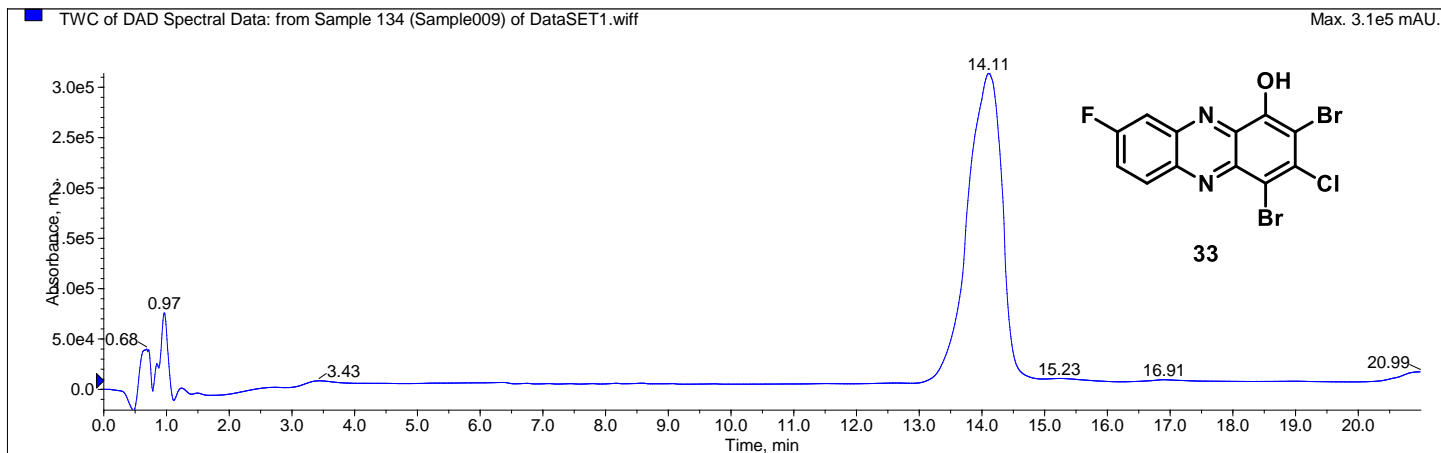

| Retention Time (Min) | Peak Area    |
|----------------------|--------------|
| 11.51                | 4725         |
| 12.64                | 4539         |
| 14.11 ( <b>33</b> )  | 11600000     |
| 15.23                | 32900        |
| <b>Sum of Area</b>   | 11642164     |
| <b>% Purity</b>      | <b>99.6%</b> |

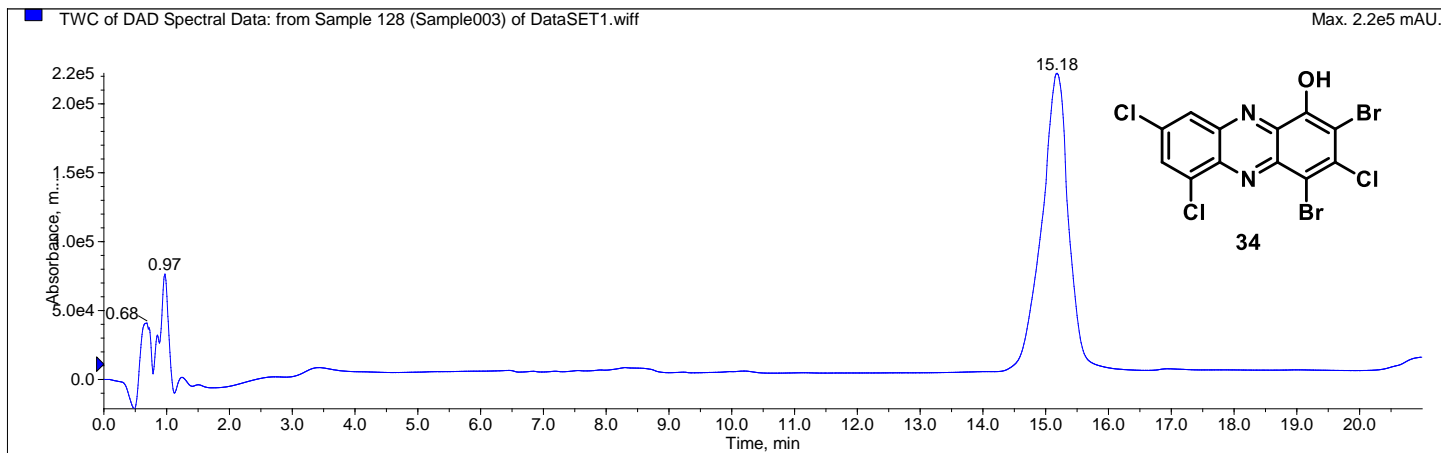

| Retention Time (Min) | Peak Area      |
|----------------------|----------------|
| 11.27                | 5207           |
| 15.18 (34)           | 6400000        |
| 17.73                | 2988           |
| <b>Sum of Area</b>   | <b>6408195</b> |
| <b>% Purity</b>      | <b>99.9%</b>   |

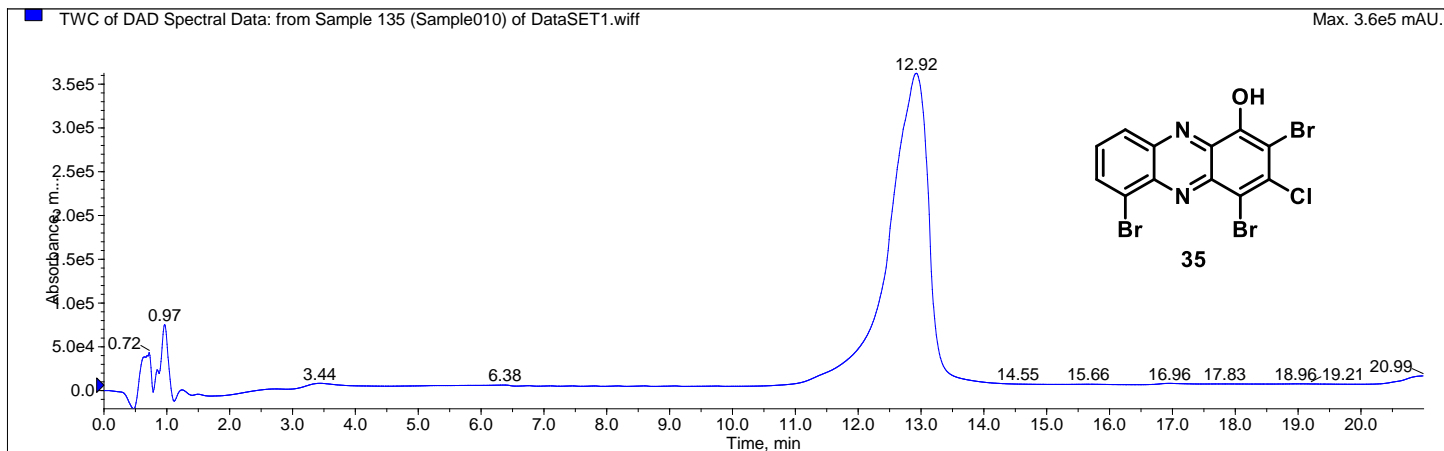

| Retention Time (Min) | Peak Area        |
|----------------------|------------------|
| 12.92 (35)           | 15700000         |
| 15.66                | 3507             |
| 17.66                | 5228             |
| <b>Sum of Area</b>   | <b>15708735</b>  |
| <b>% Purity</b>      | <b>&gt;99.9%</b> |

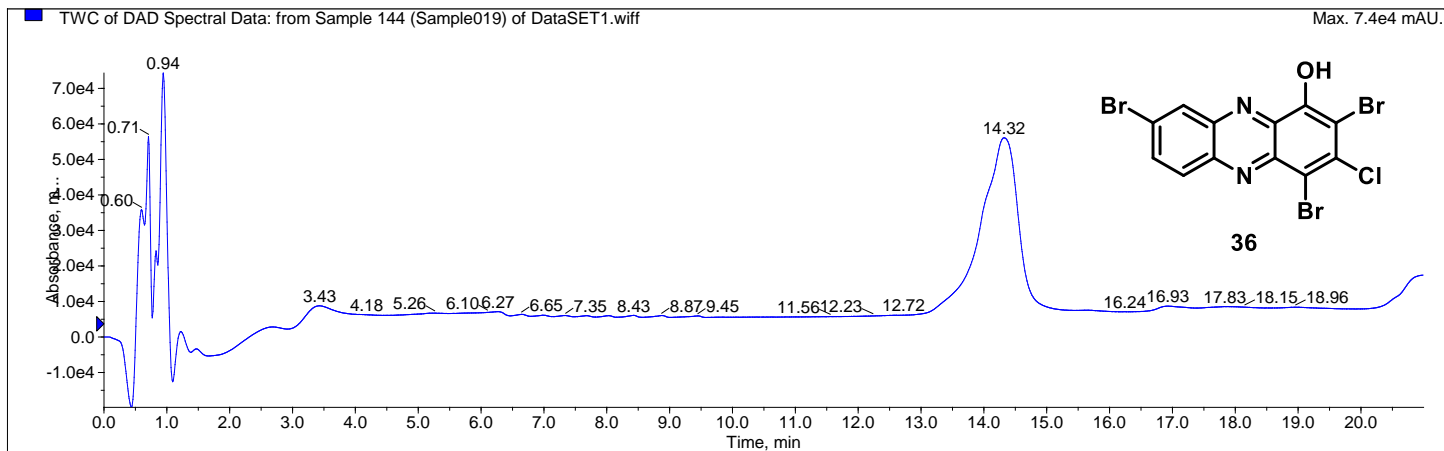

| Retention Time (Min) | Peak Area    |
|----------------------|--------------|
| 8.87                 | 5904         |
| 9.45                 | 5161         |
| 14.32 ( <b>36</b> )  | 1990000      |
| 17.87                | 11086        |
| <b>Sum of Area</b>   | 2012151      |
| <b>% Purity</b>      | <b>98.9%</b> |

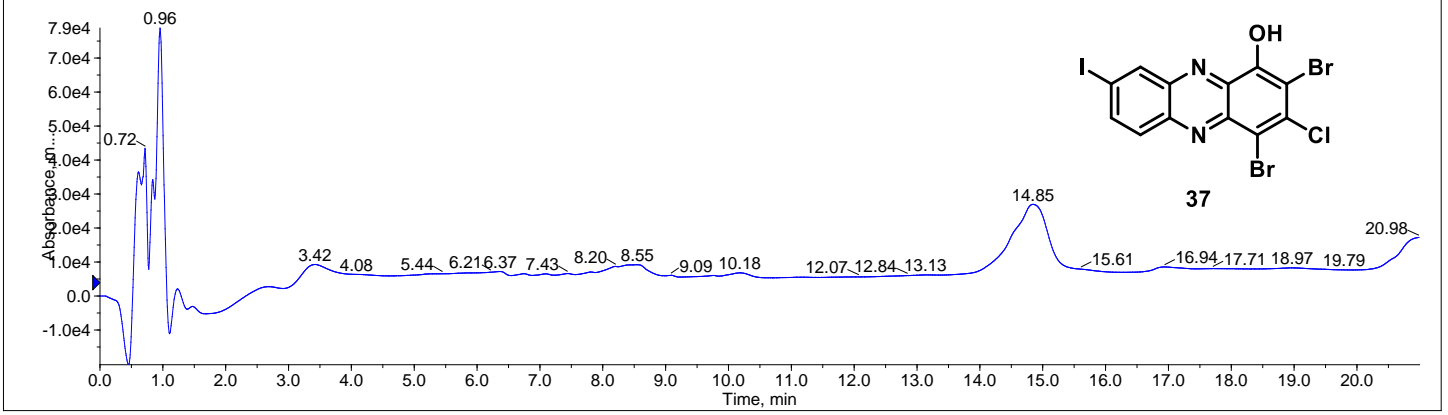

| Retention Time (Min) | Peak Area     |
|----------------------|---------------|
| 11.18                | 1420          |
| 13.13                | 825           |
| 14.85 (37)           | 760000        |
| <b>Sum of Area</b>   | <b>762245</b> |
| <b>% Purity</b>      | <b>99.7%</b>  |

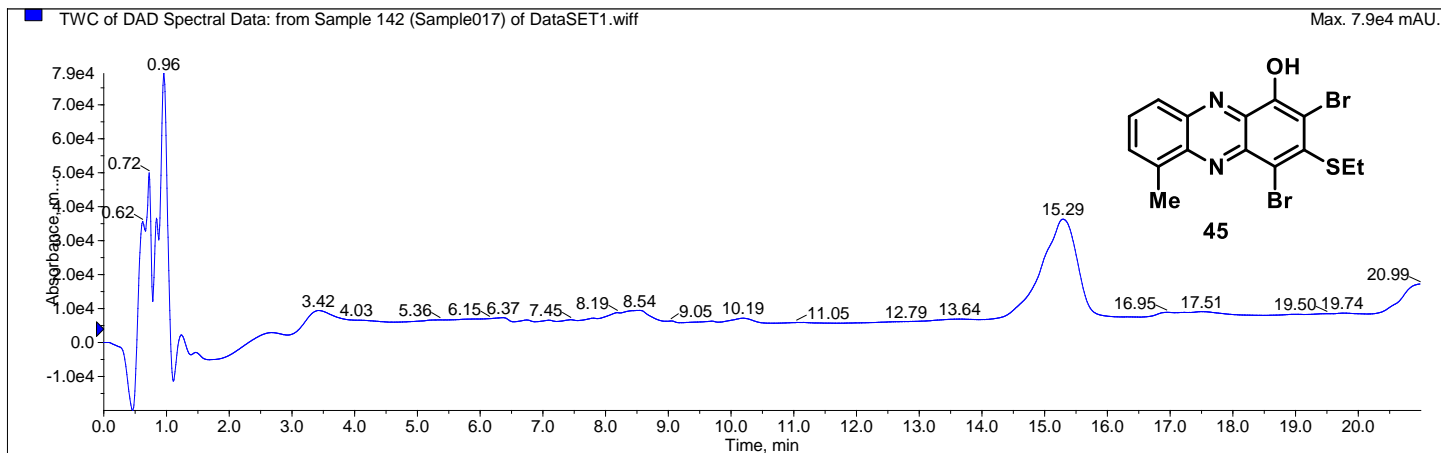

| Retention Time (Min) | Peak Area      |
|----------------------|----------------|
| 11.15                | 4579           |
| 13.64                | 3454           |
| 15.29 (45)           | 1140000        |
| 17.51                | 17500          |
| <b>Sum of Area</b>   | <b>1165533</b> |
| <b>% Purity</b>      | <b>97.8%</b>   |

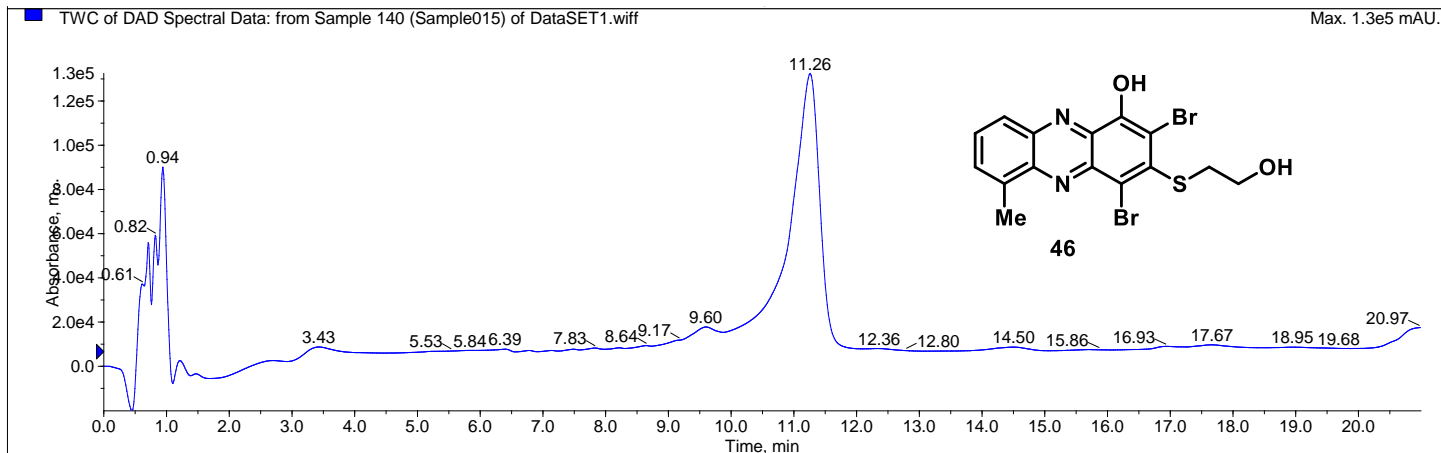

| Retention Time (Min) | Peak Area      |
|----------------------|----------------|
| 9.17                 | 1184           |
| 9.60                 | 76600          |
| 11.26 (46)           | 3860000        |
| 14.50                | 51900          |
| 17.67                | 45300          |
| <b>Sum of Area</b>   | <b>4034984</b> |
| <b>% Purity</b>      | <b>95.7%</b>   |



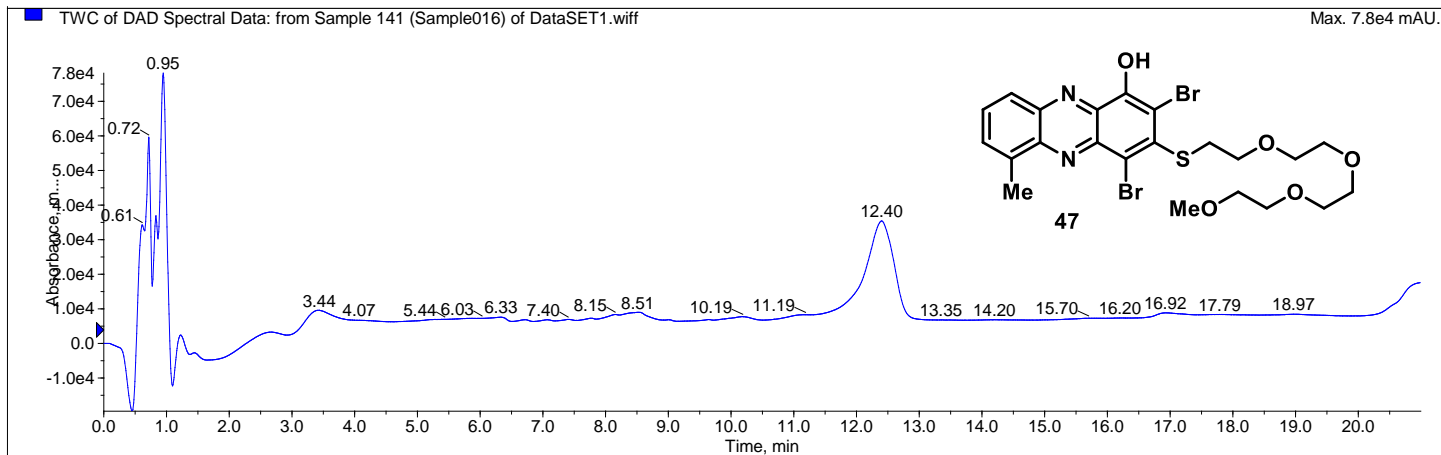

| Retention Time (Min) | Peak Area        |
|----------------------|------------------|
| 11.19                | 176              |
| 12.40 (47)           | 887000           |
| 13.35                | 67               |
| <b>Sum of Area</b>   | <b>887243</b>    |
| <b>% Purity</b>      | <b>&gt;99.9%</b> |

## 16.) Literature References.

1. Sachin, K.; Jadhav, V.H.; Kim, E.M.; Kim, H.L.; Lee, S.B.; Jeong, H.J.; Lim, S.T.; Sohn, M.H.; Kim, D.W. *Bioconjug. Chem.* **2012**, *23*, 1680-1686.
2. Snow, A.W.; Foos, E.E. *Synthesis* **2003**, *14*, 0509-0512.
3. Garrison, A.T.; Abouelhassan, Y.; Norwood IV, V.M.; Kallifidas, D.; Bai, F.; Nguyen, M.; Rolfe, M.; Burch, G.M.; Jin, S.; Luesch, H.; Huigens III, R.W. *J. Med. Chem.* **2016**, *59*, 3808-3825.
4. Yang, H.; Abouelhassan, Y.; Burch, G.M.; Kallifidas, D.; Huang, G.; Yousaf, H.; Jin, S.; Luesch, H.; Huigens III, R.W. *Sci. Rep.* **2017**, *7*, 2003.
5. Garrison, A.T.; Abouelhassan, Y.; Kallifidas, D.; Tan, H.; Kim, Y.S.; Jin, S.; Luesch, H.; Huigens III, R.W. *J. Med. Chem.* **2018**, *61*, 3962-3983.

## 17. NMR Spectra.

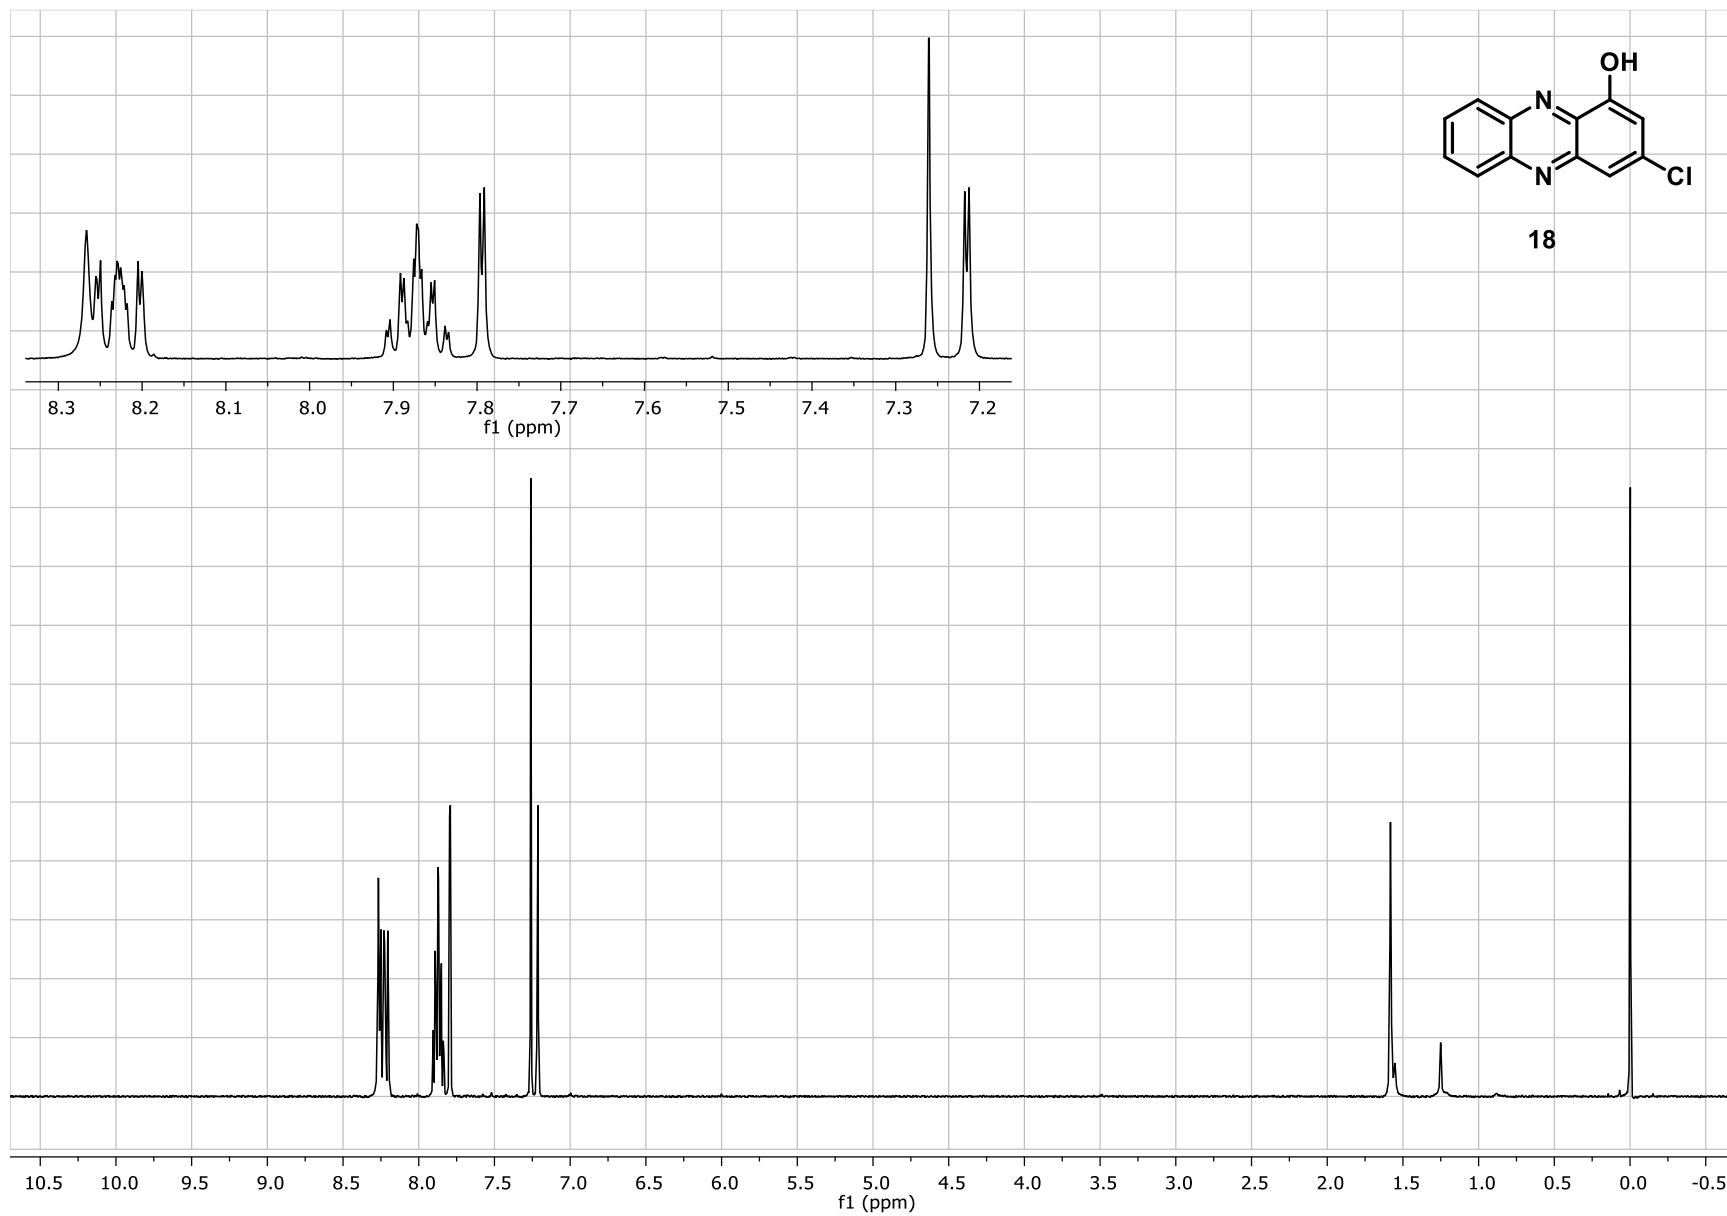

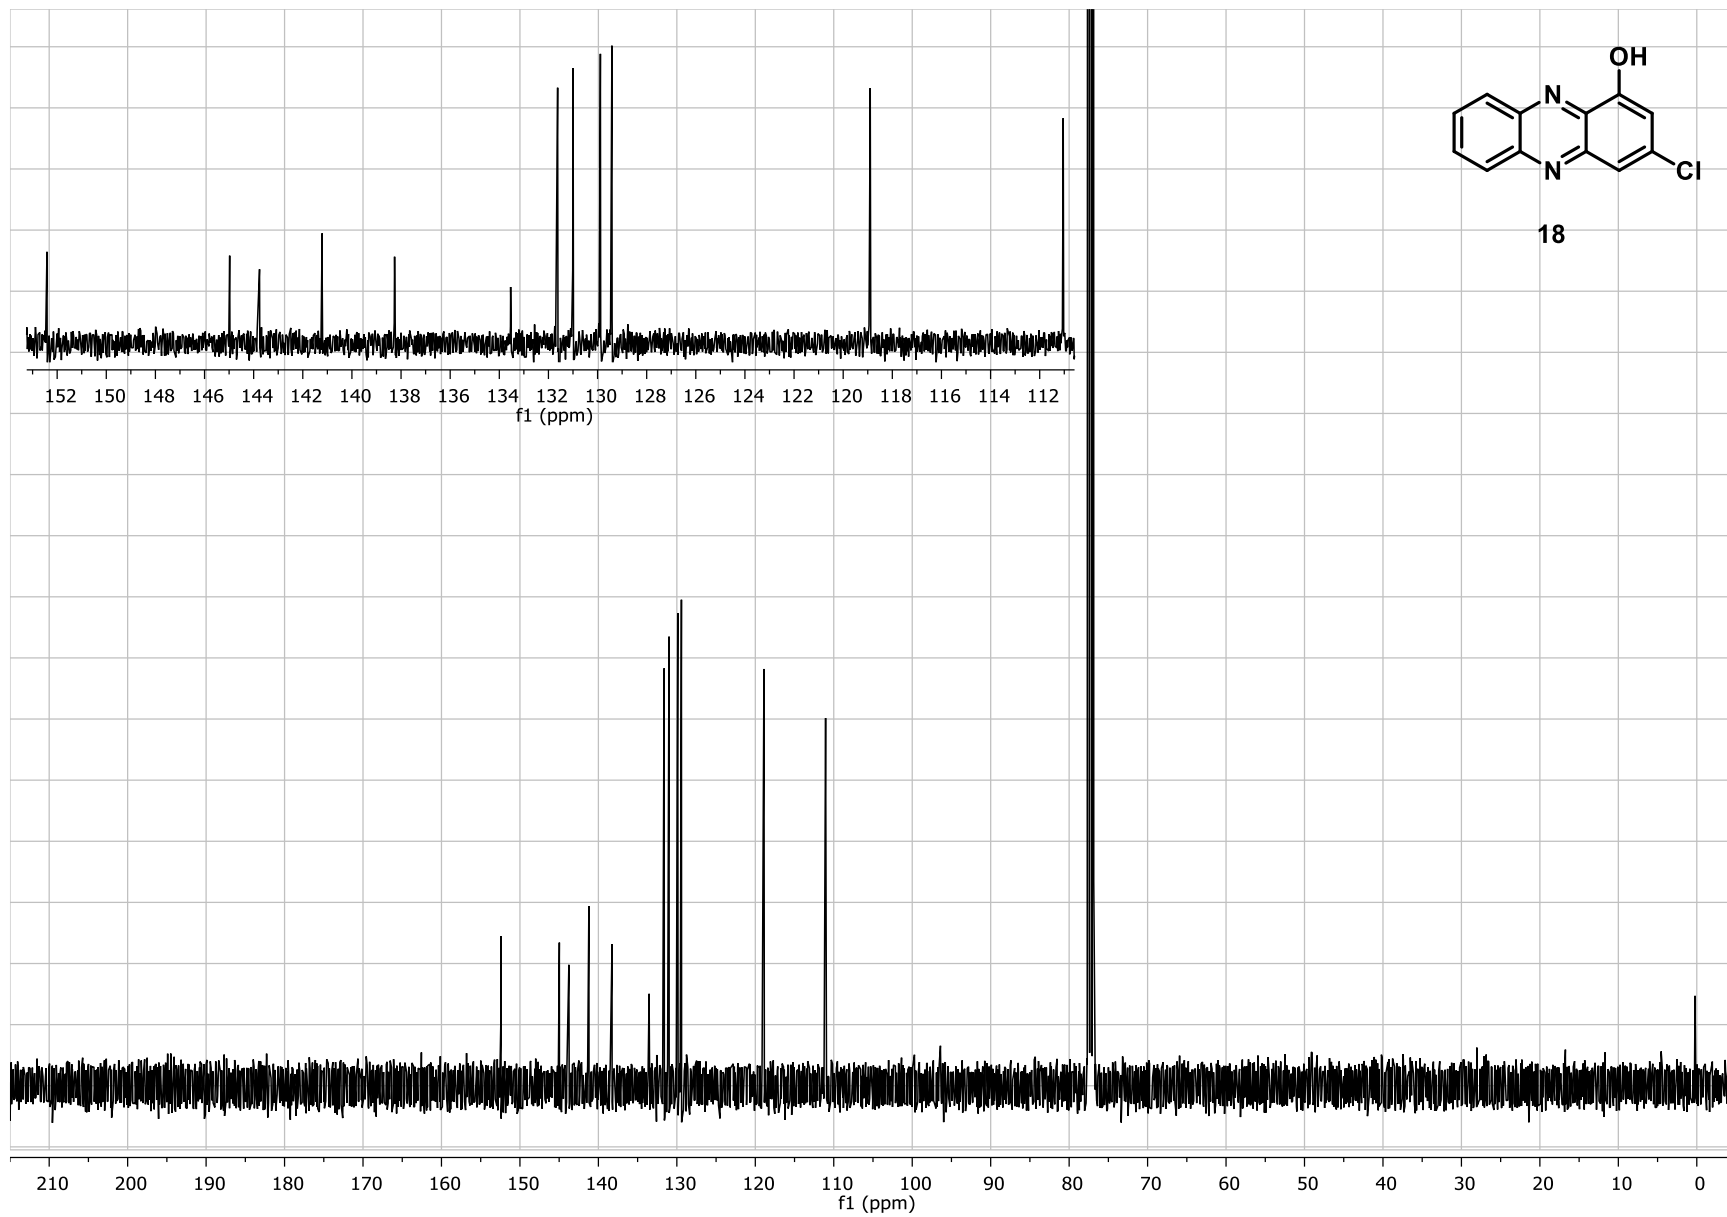

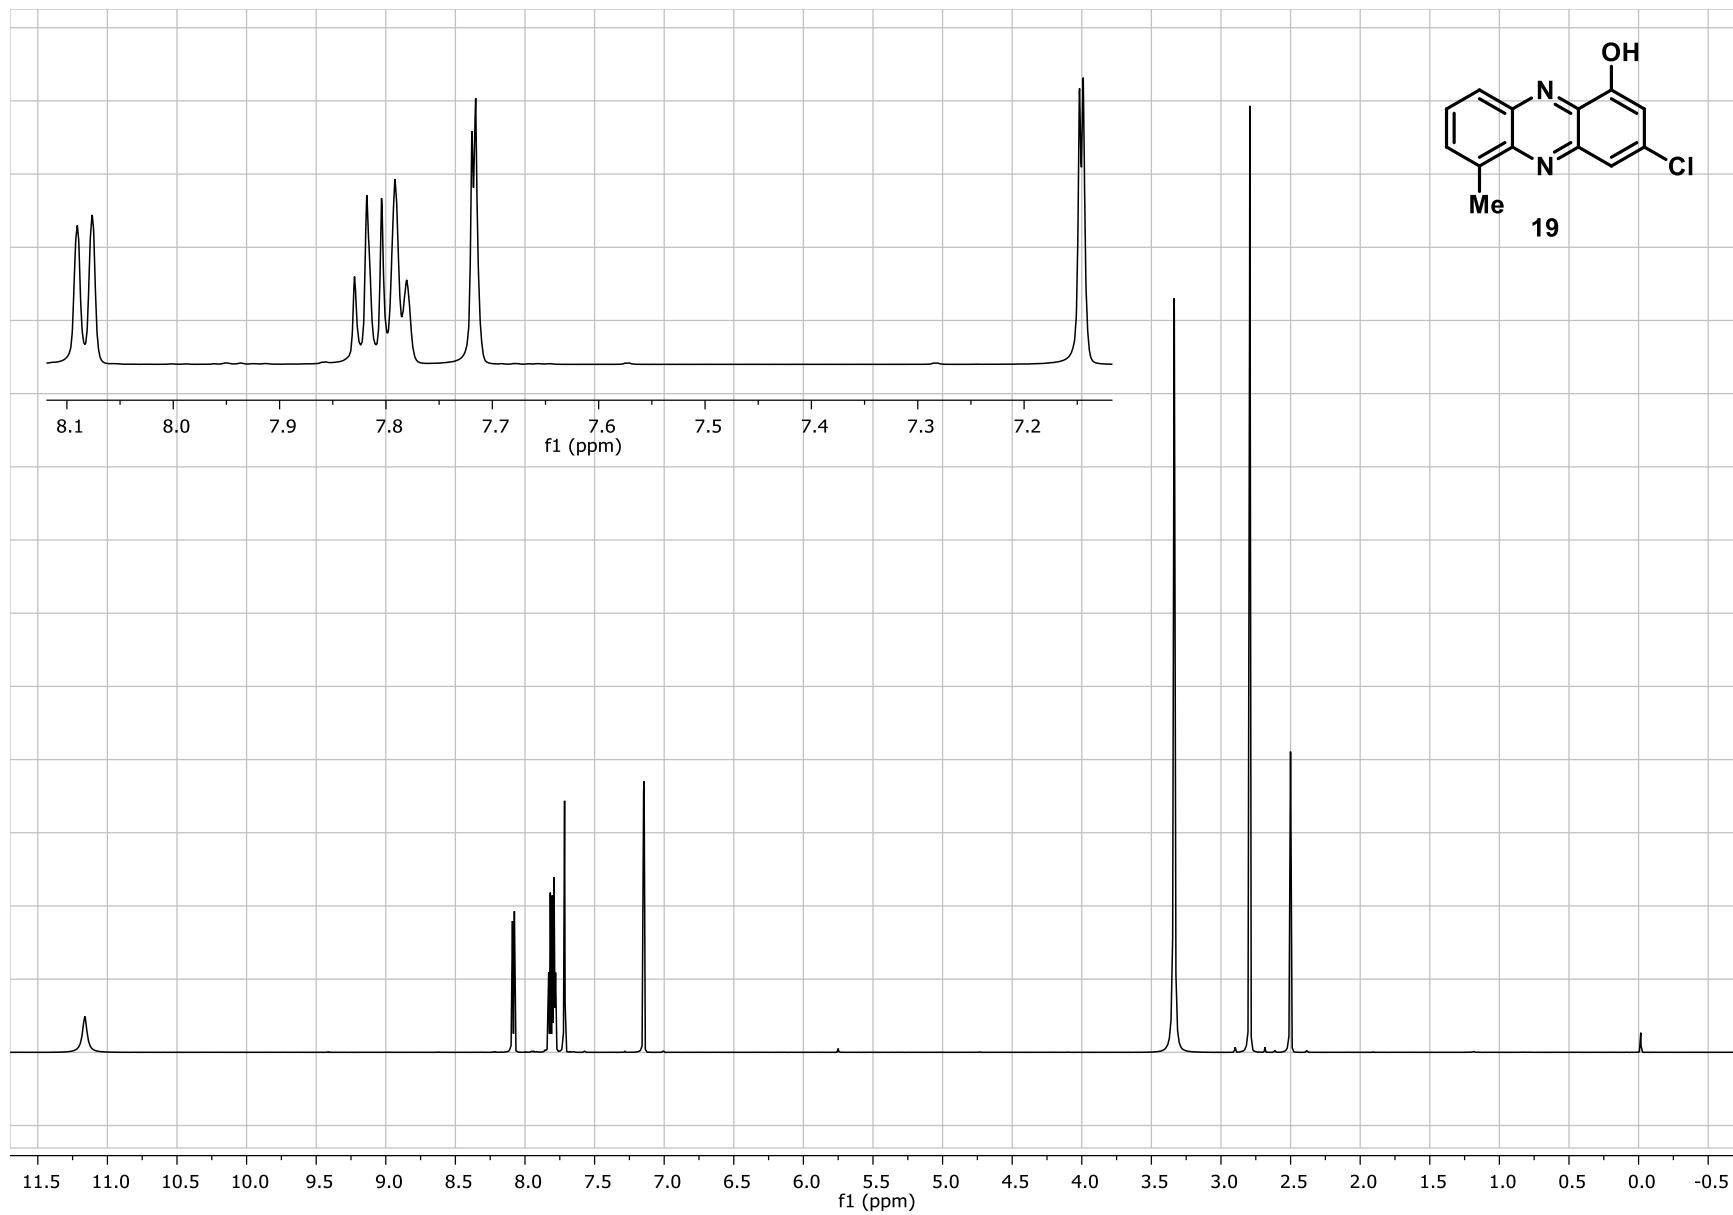

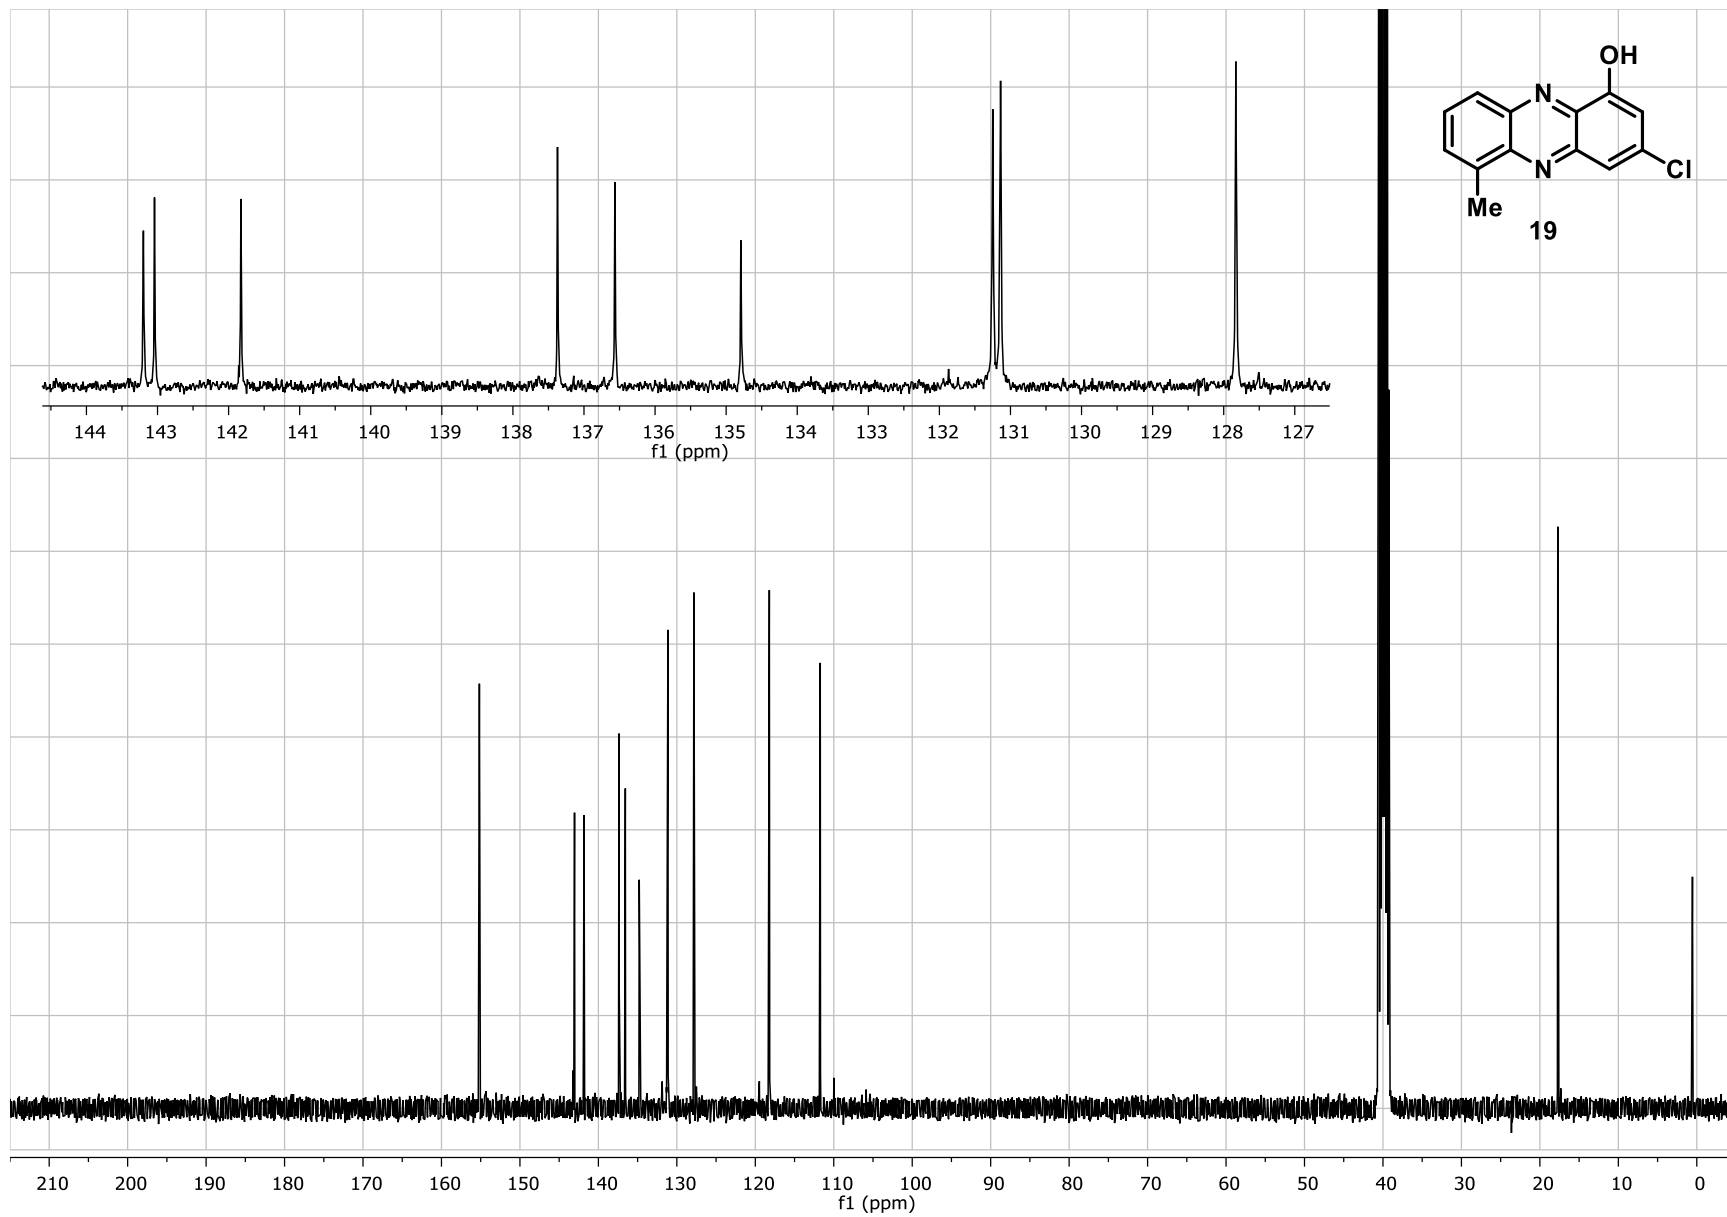

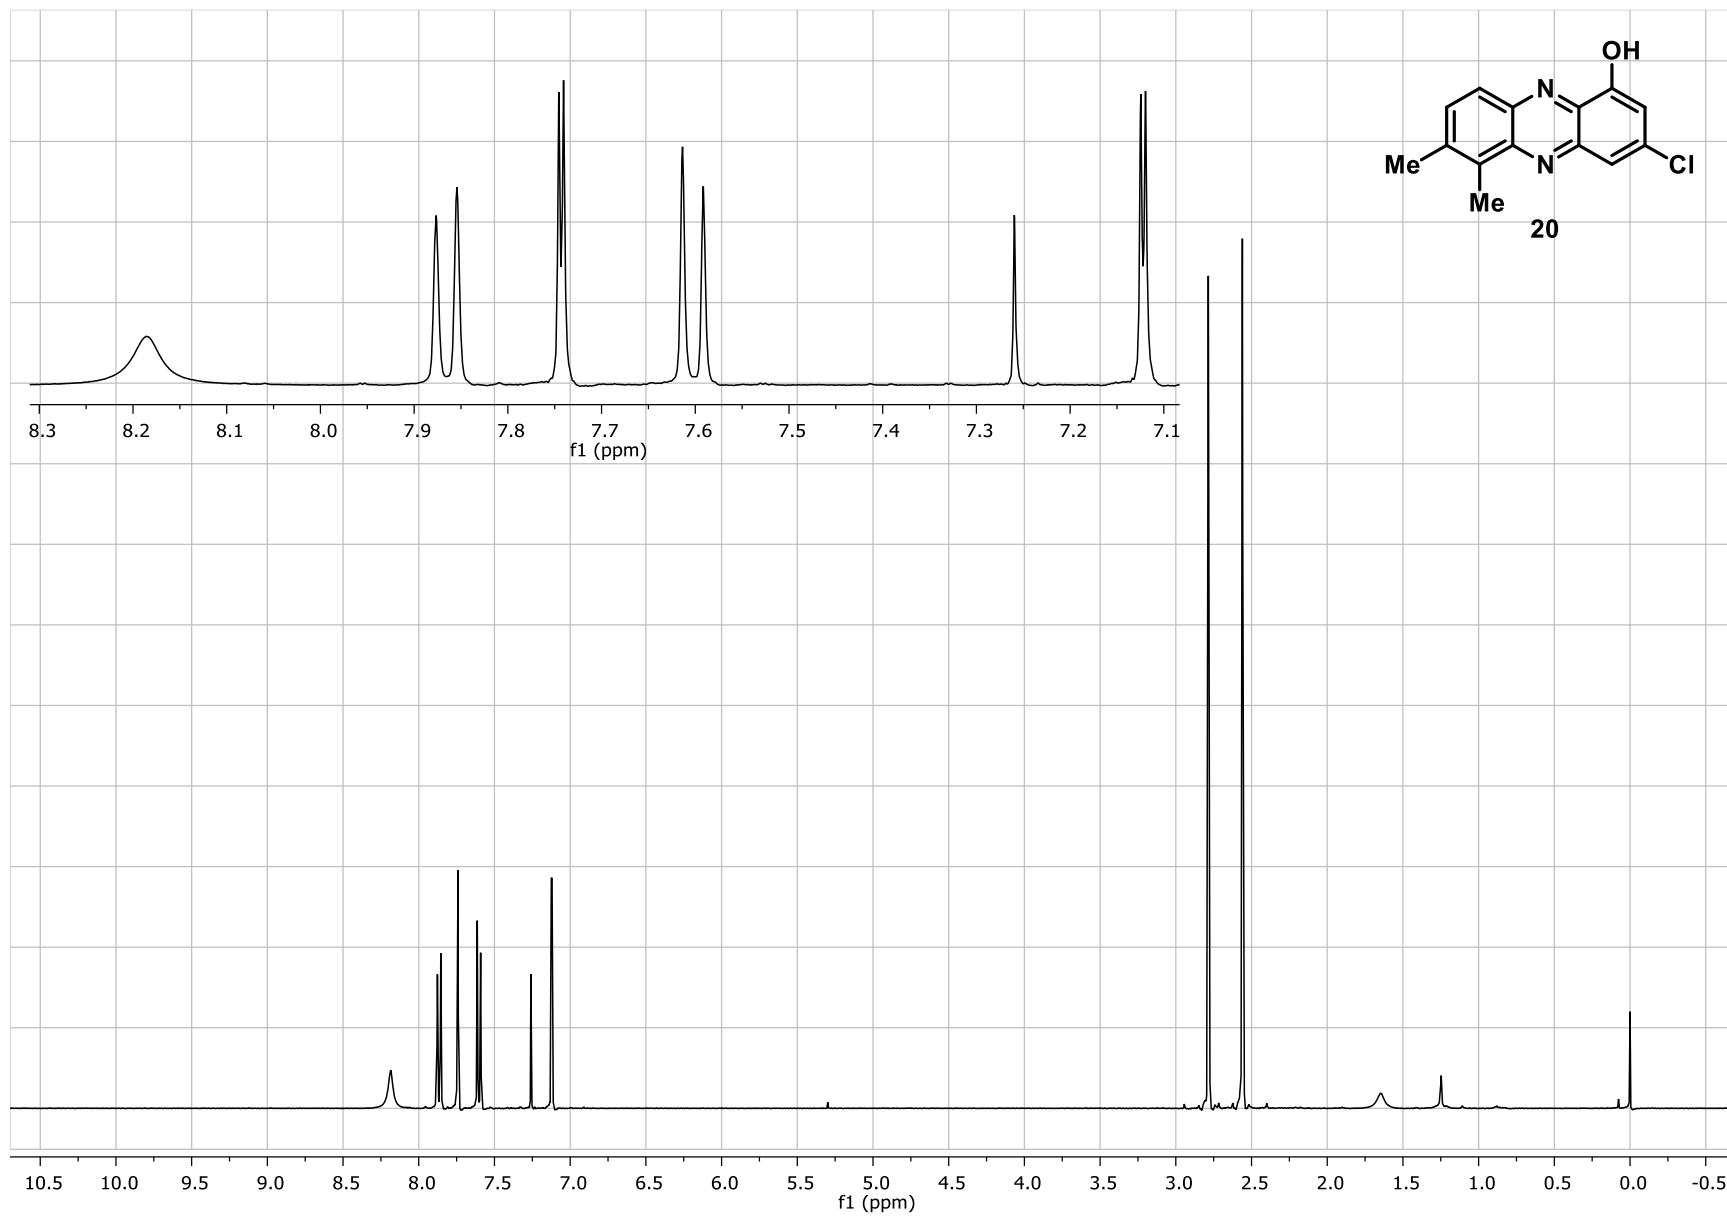



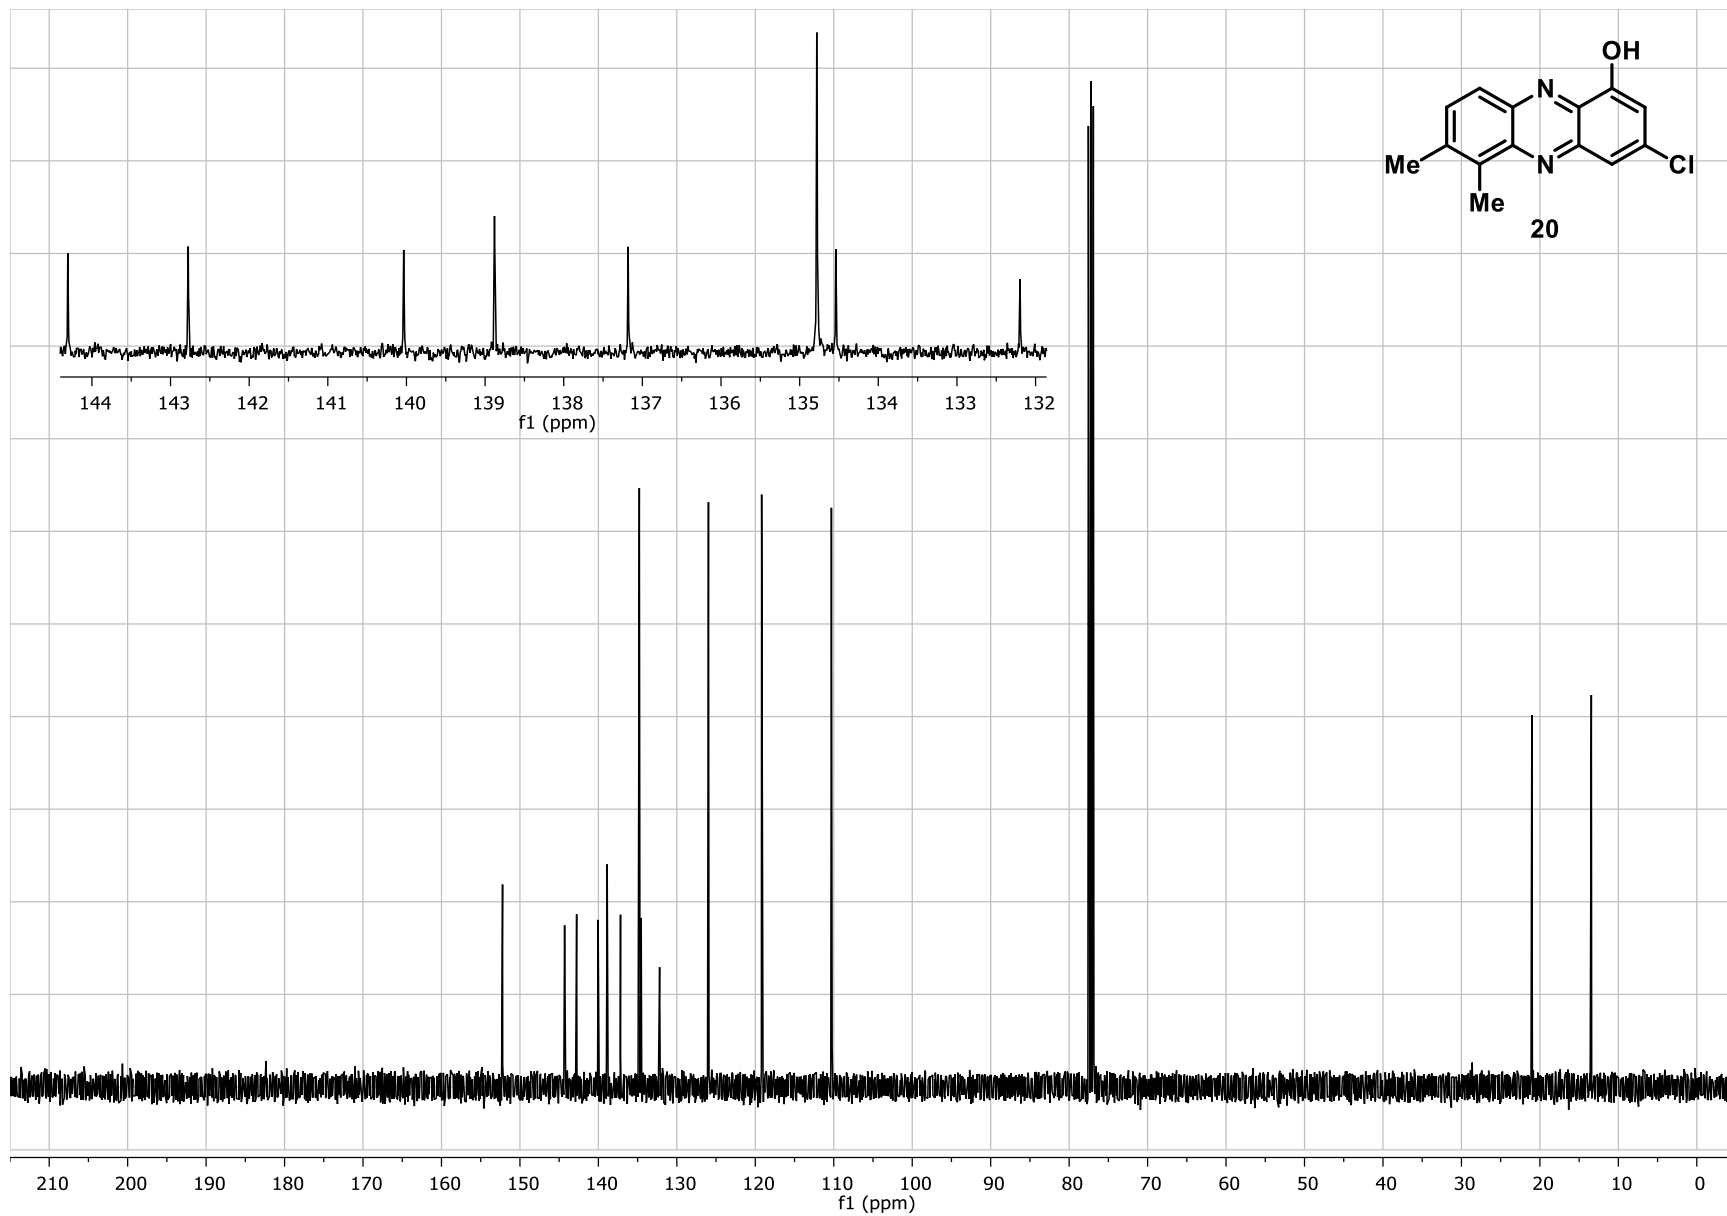

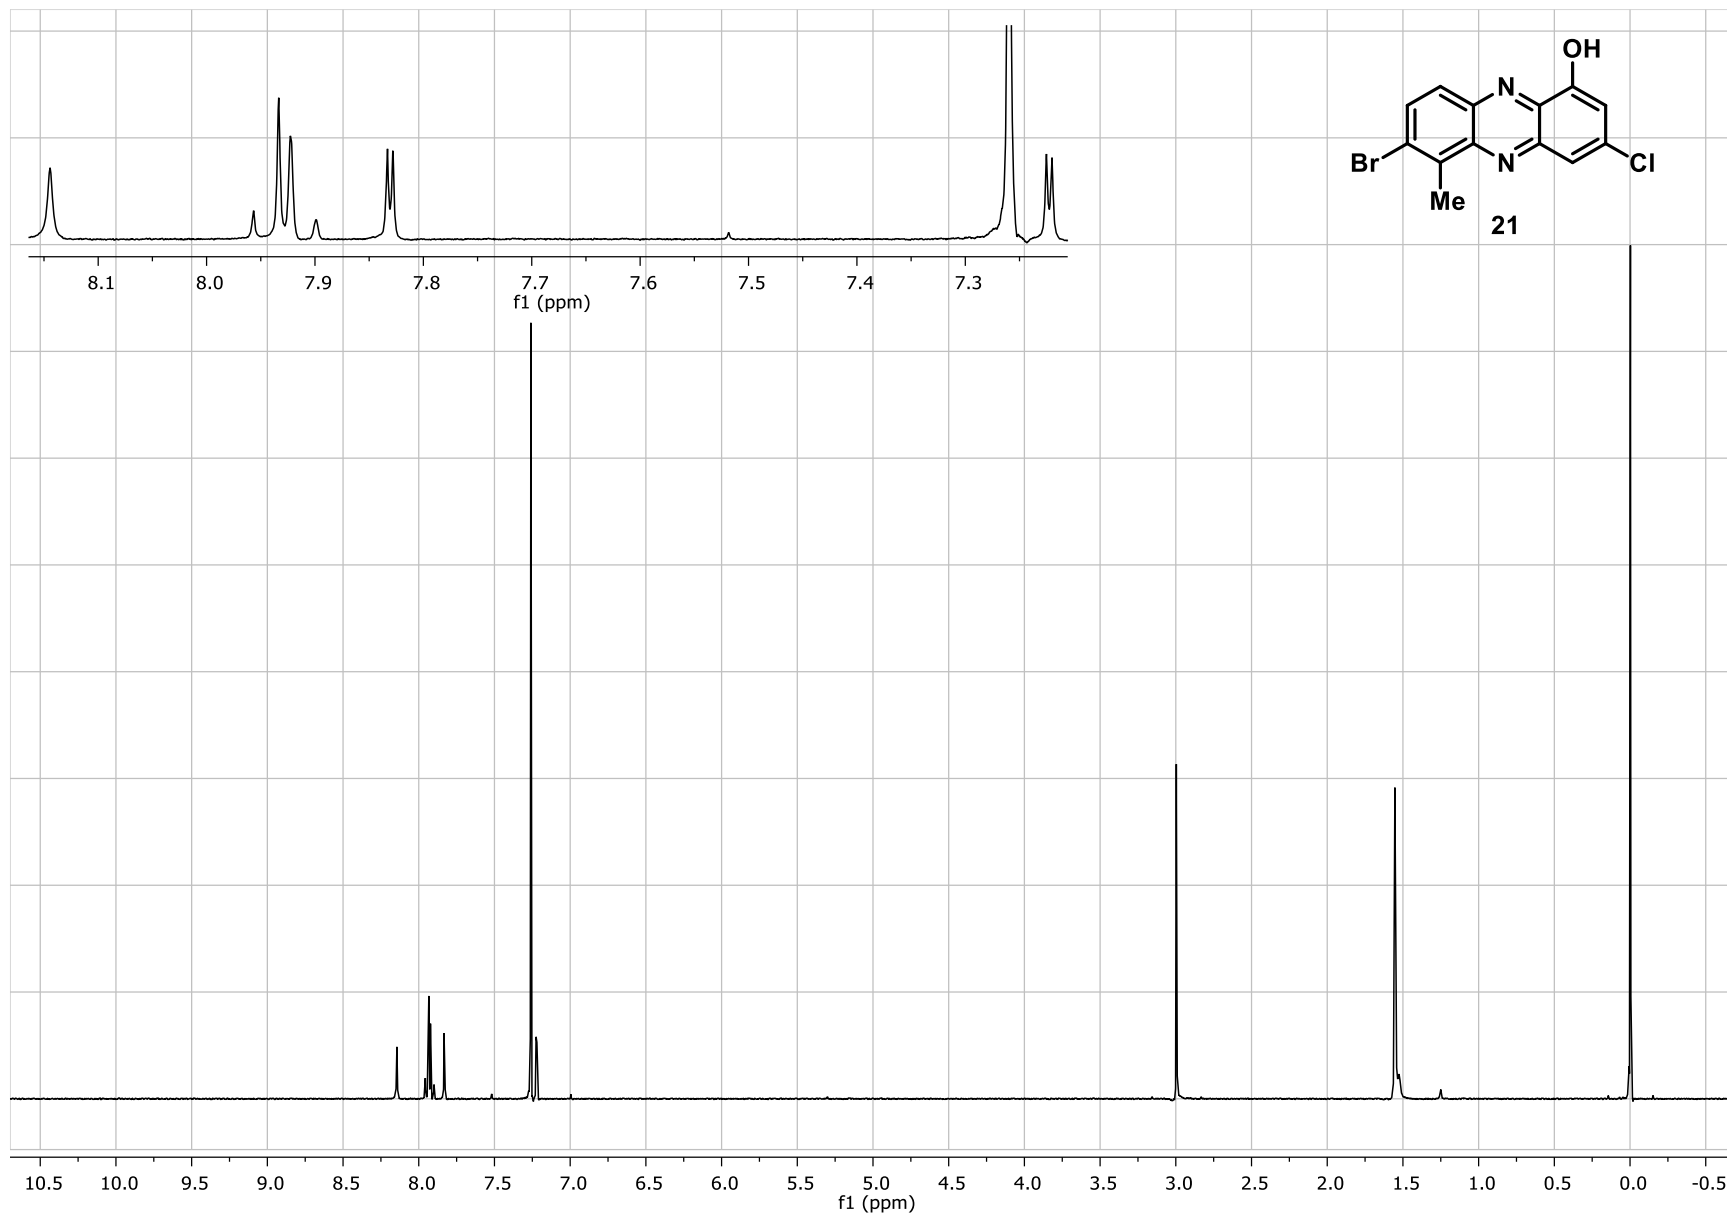

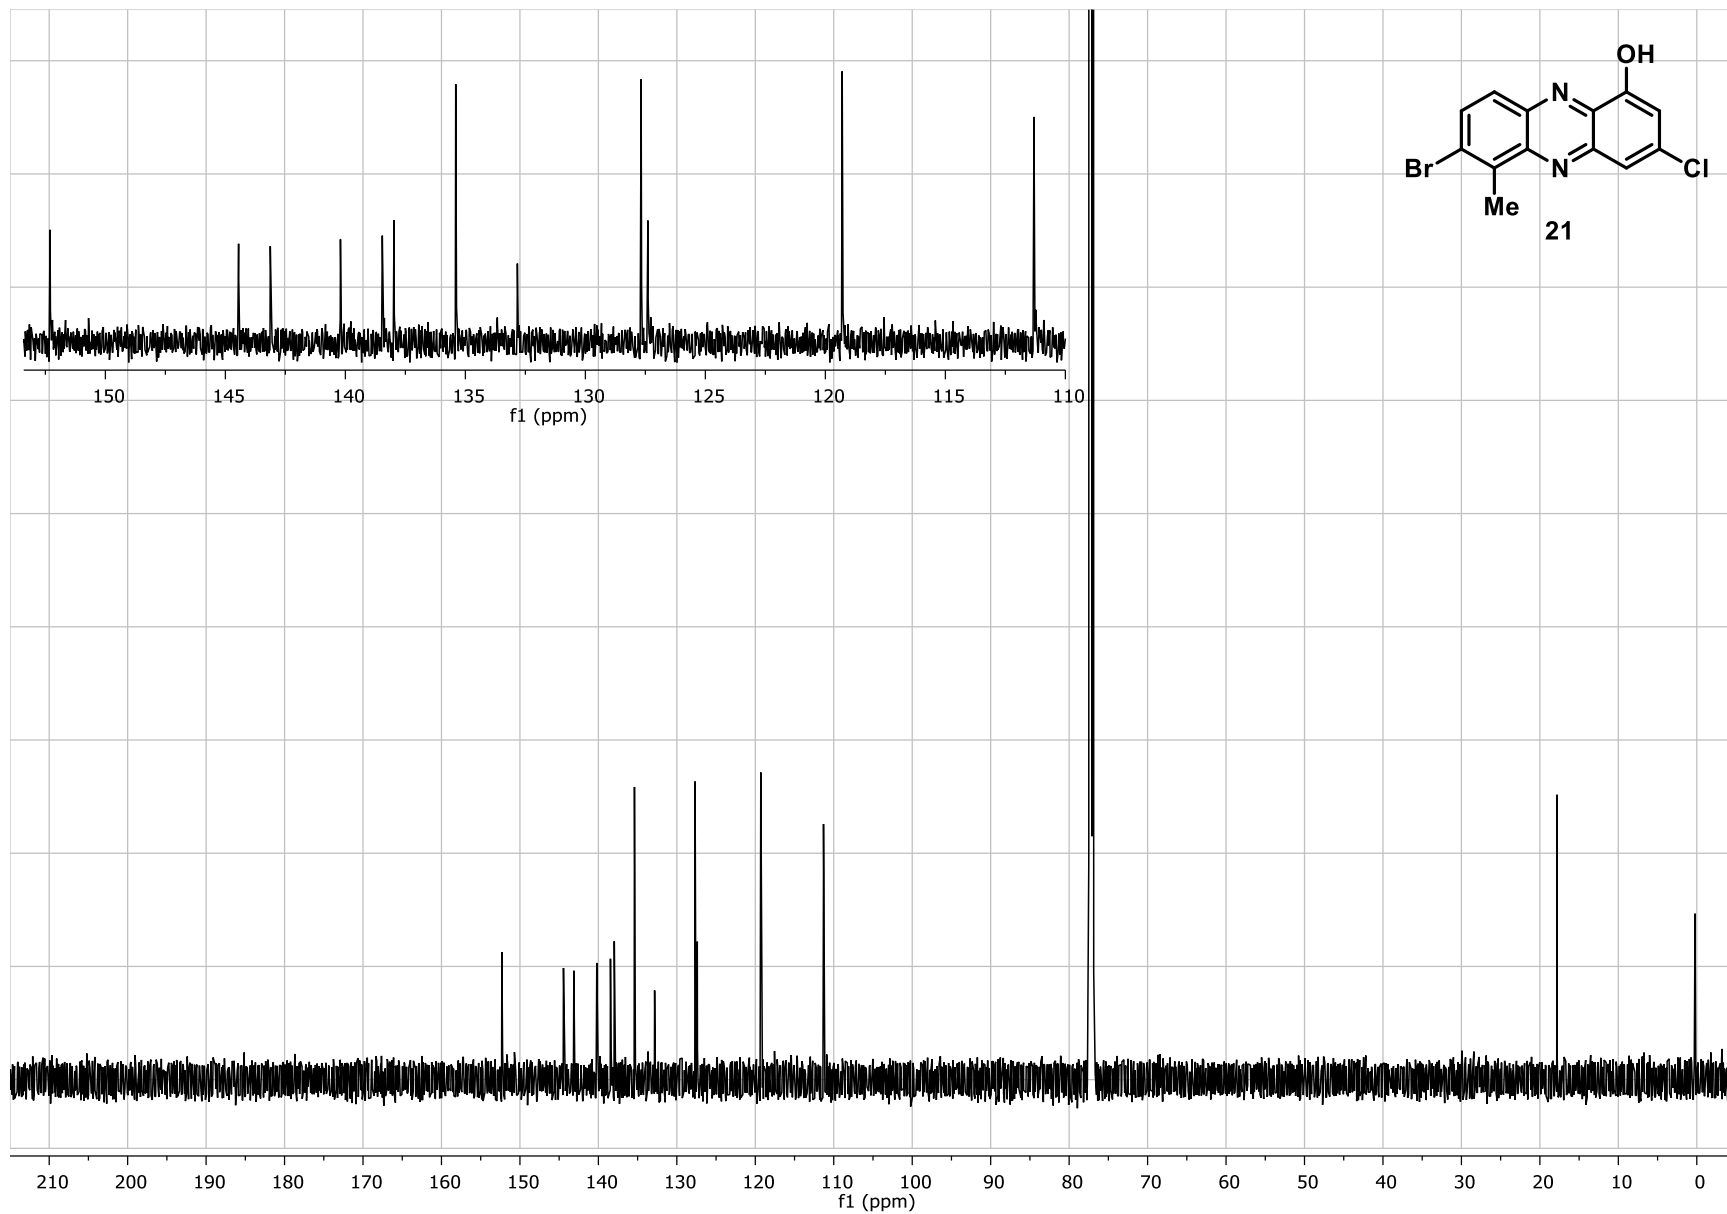

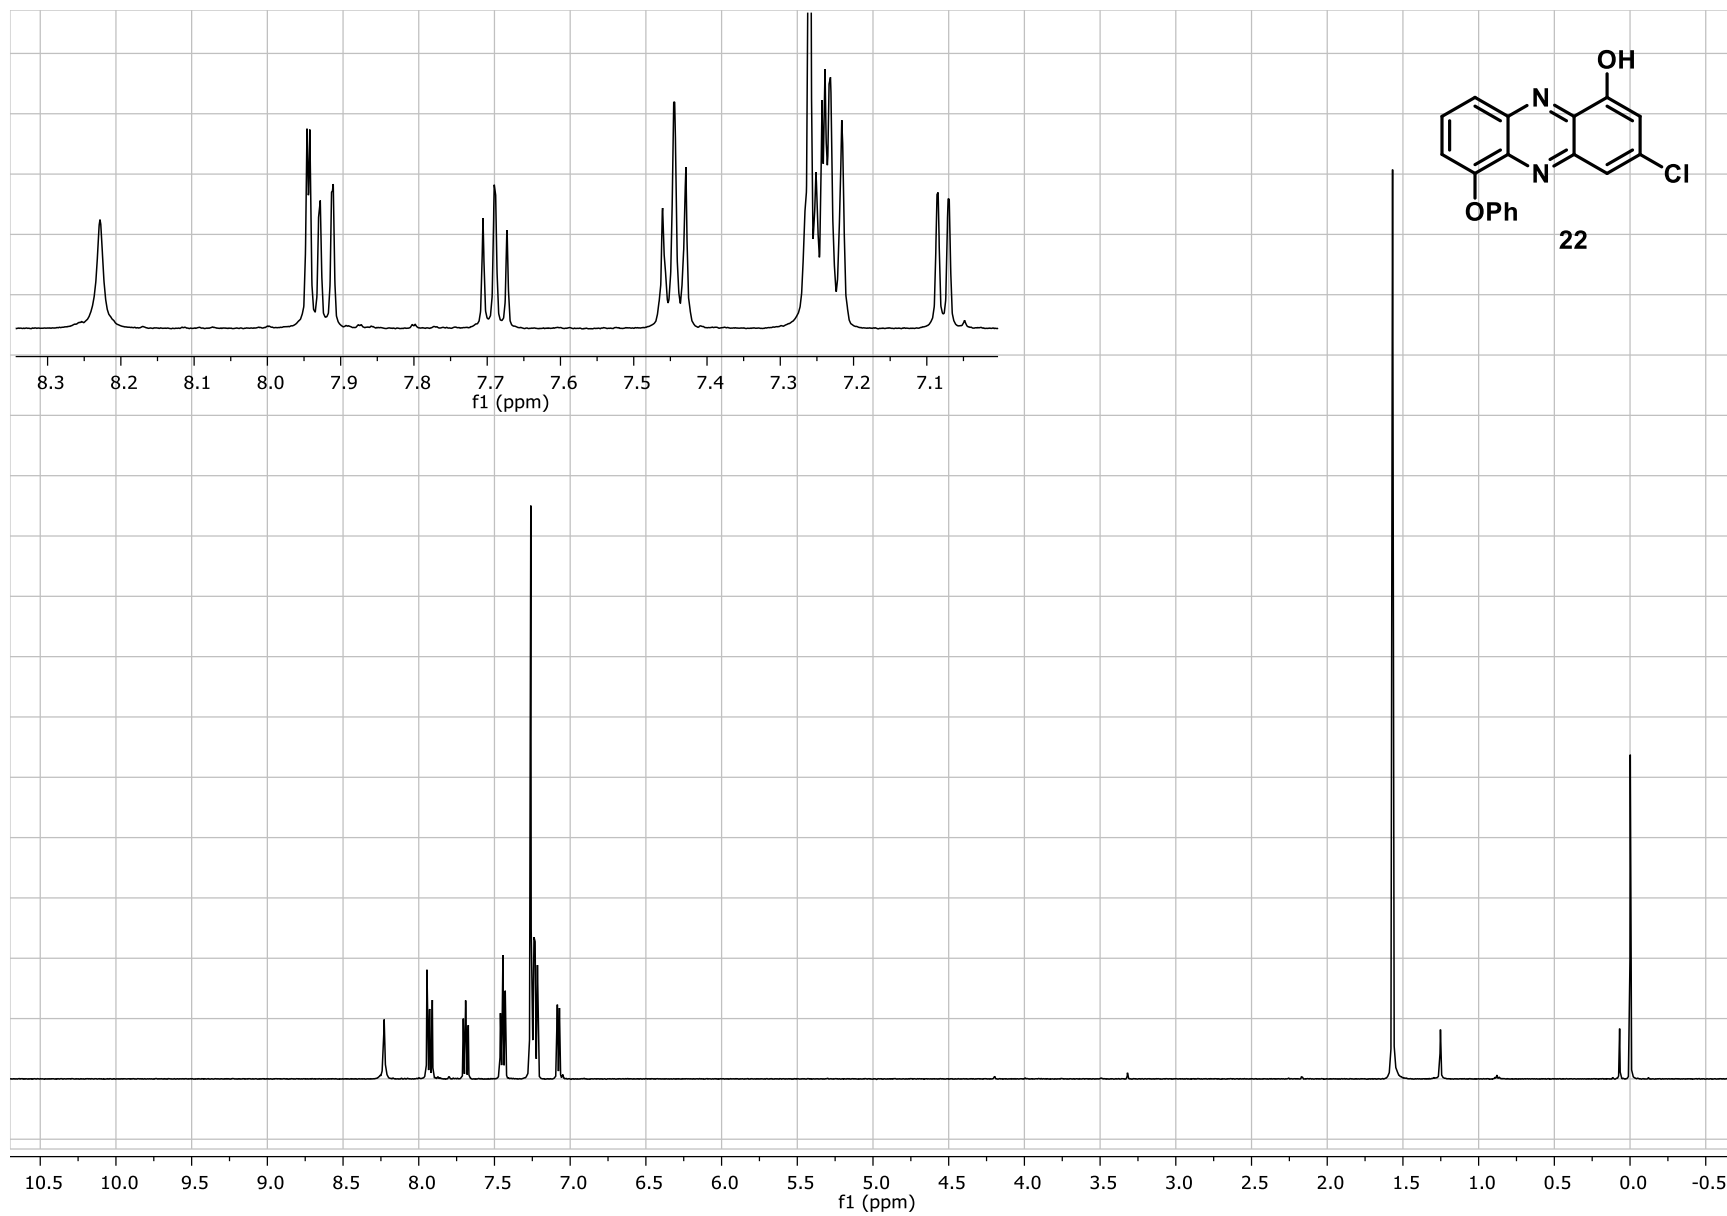

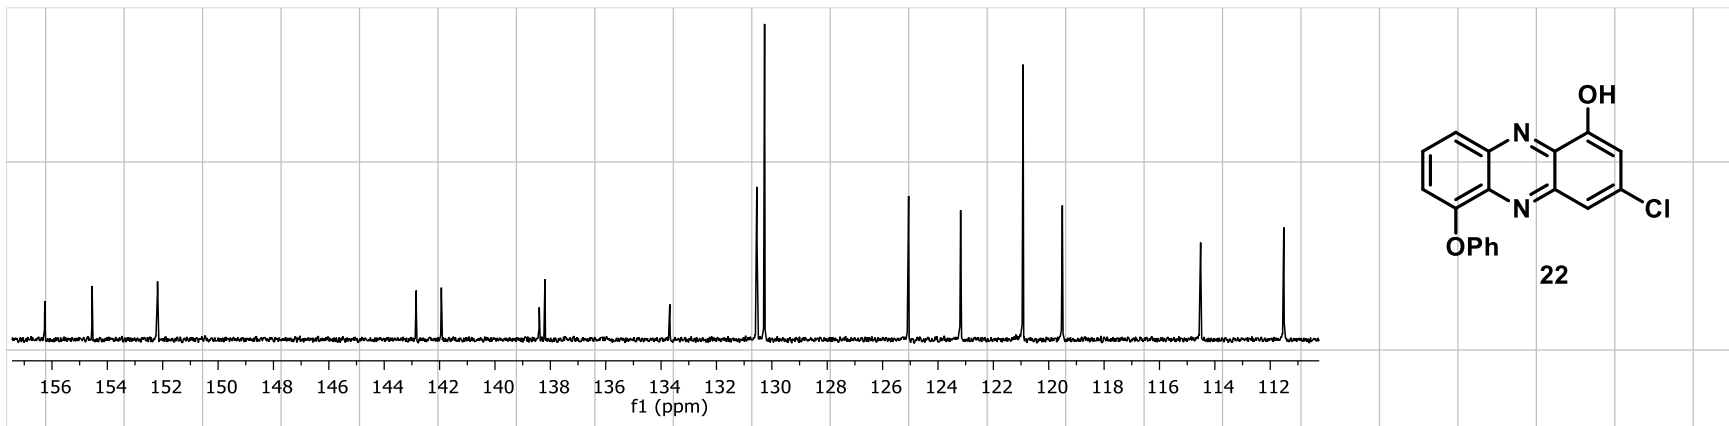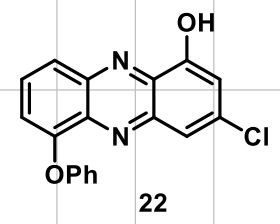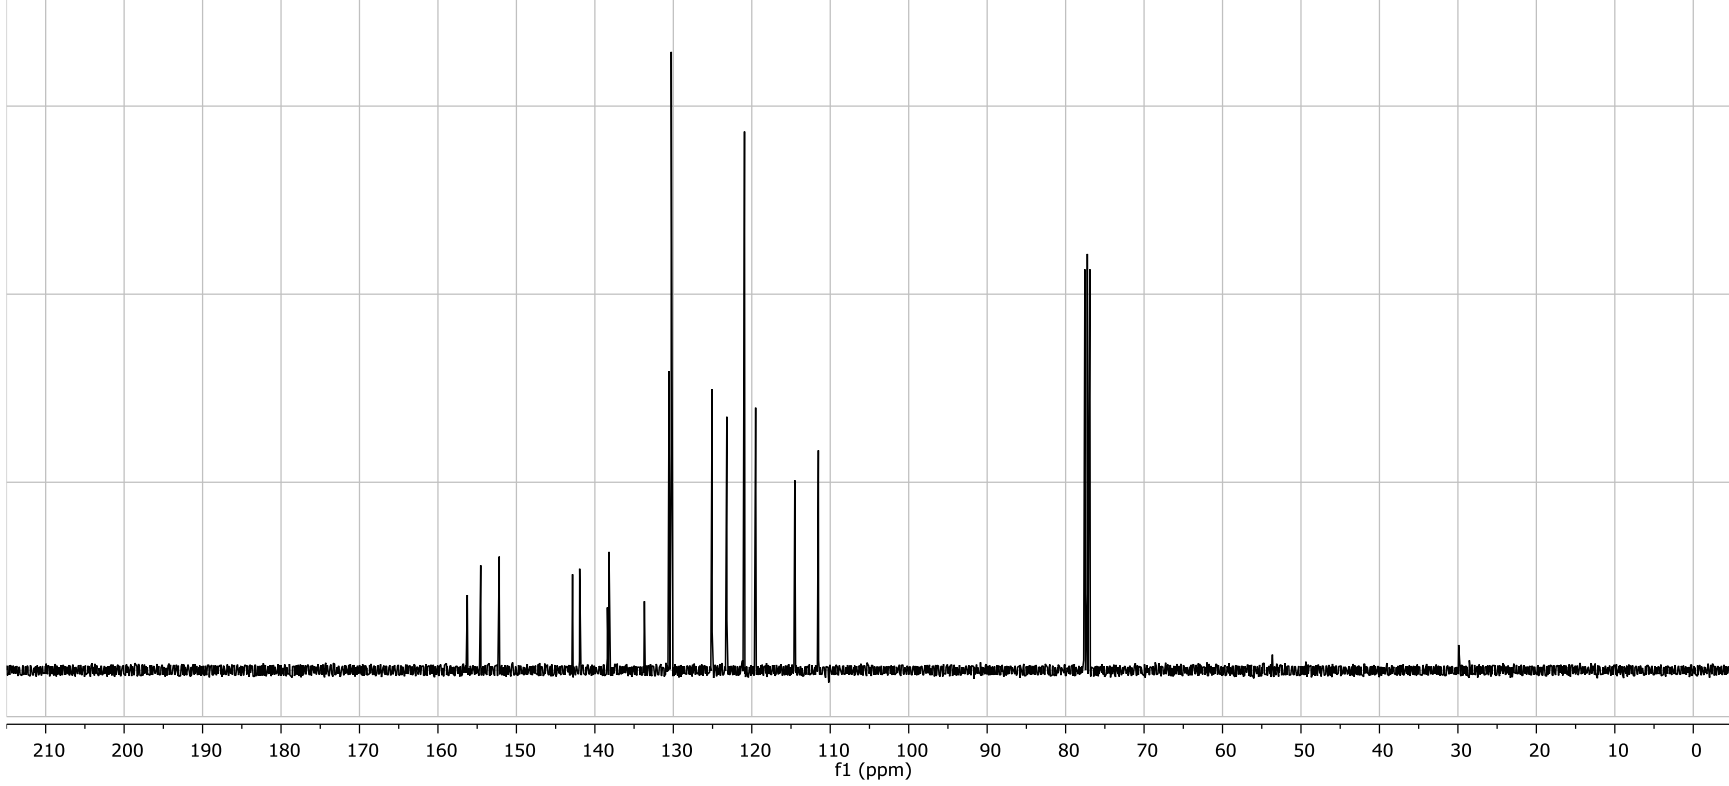

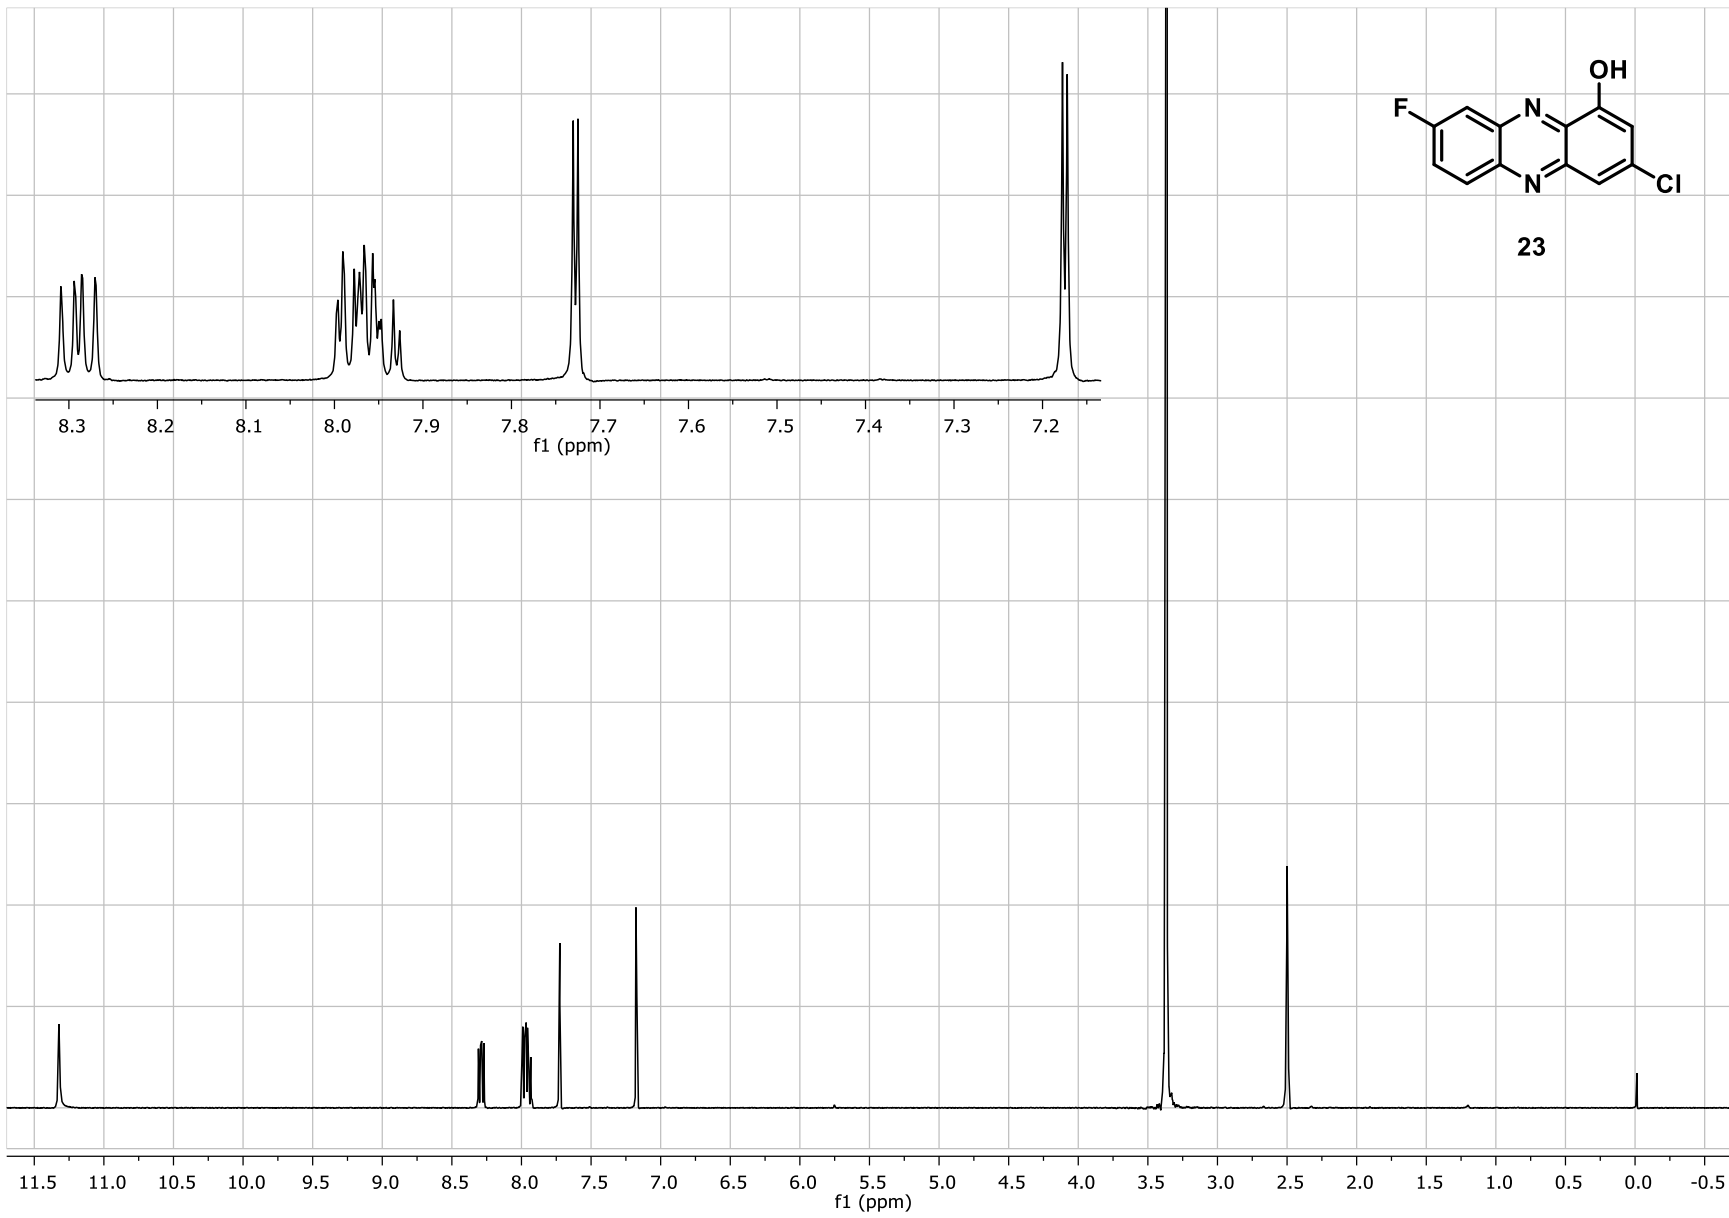

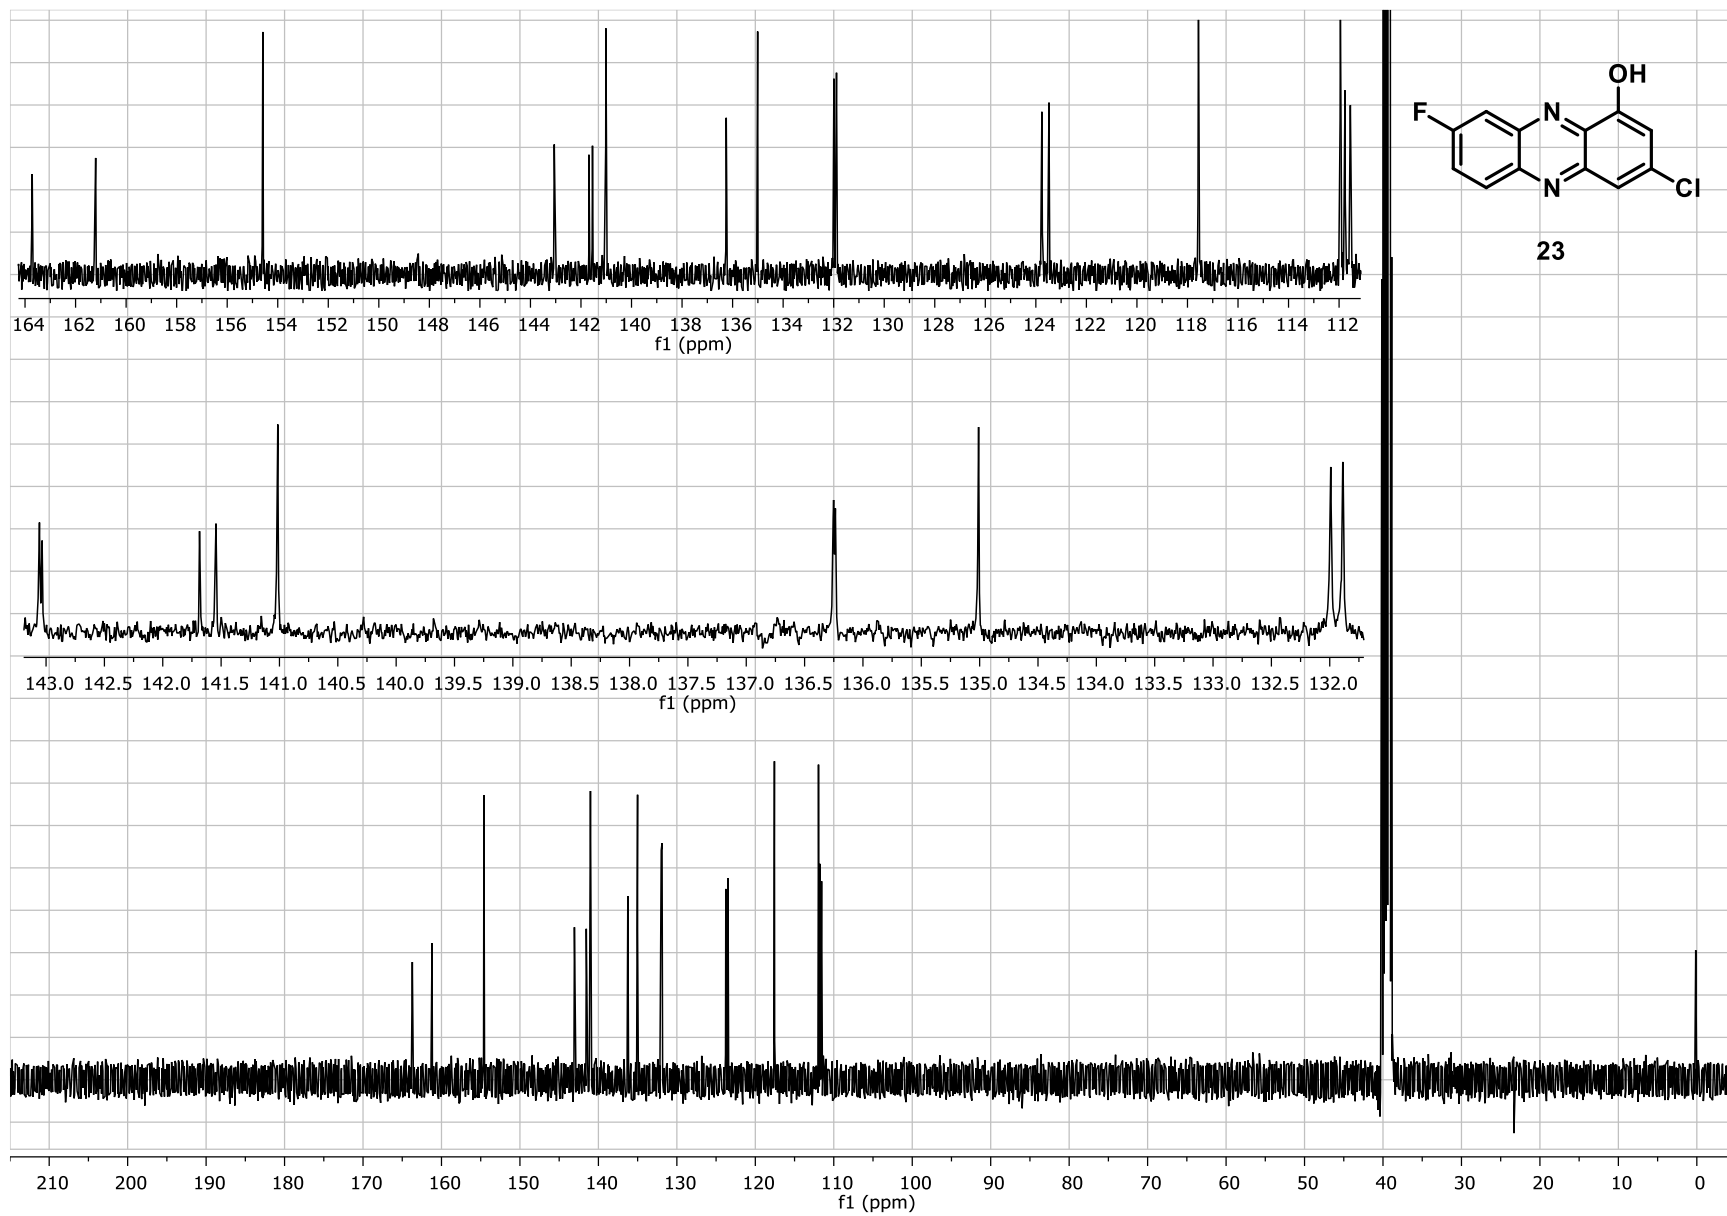

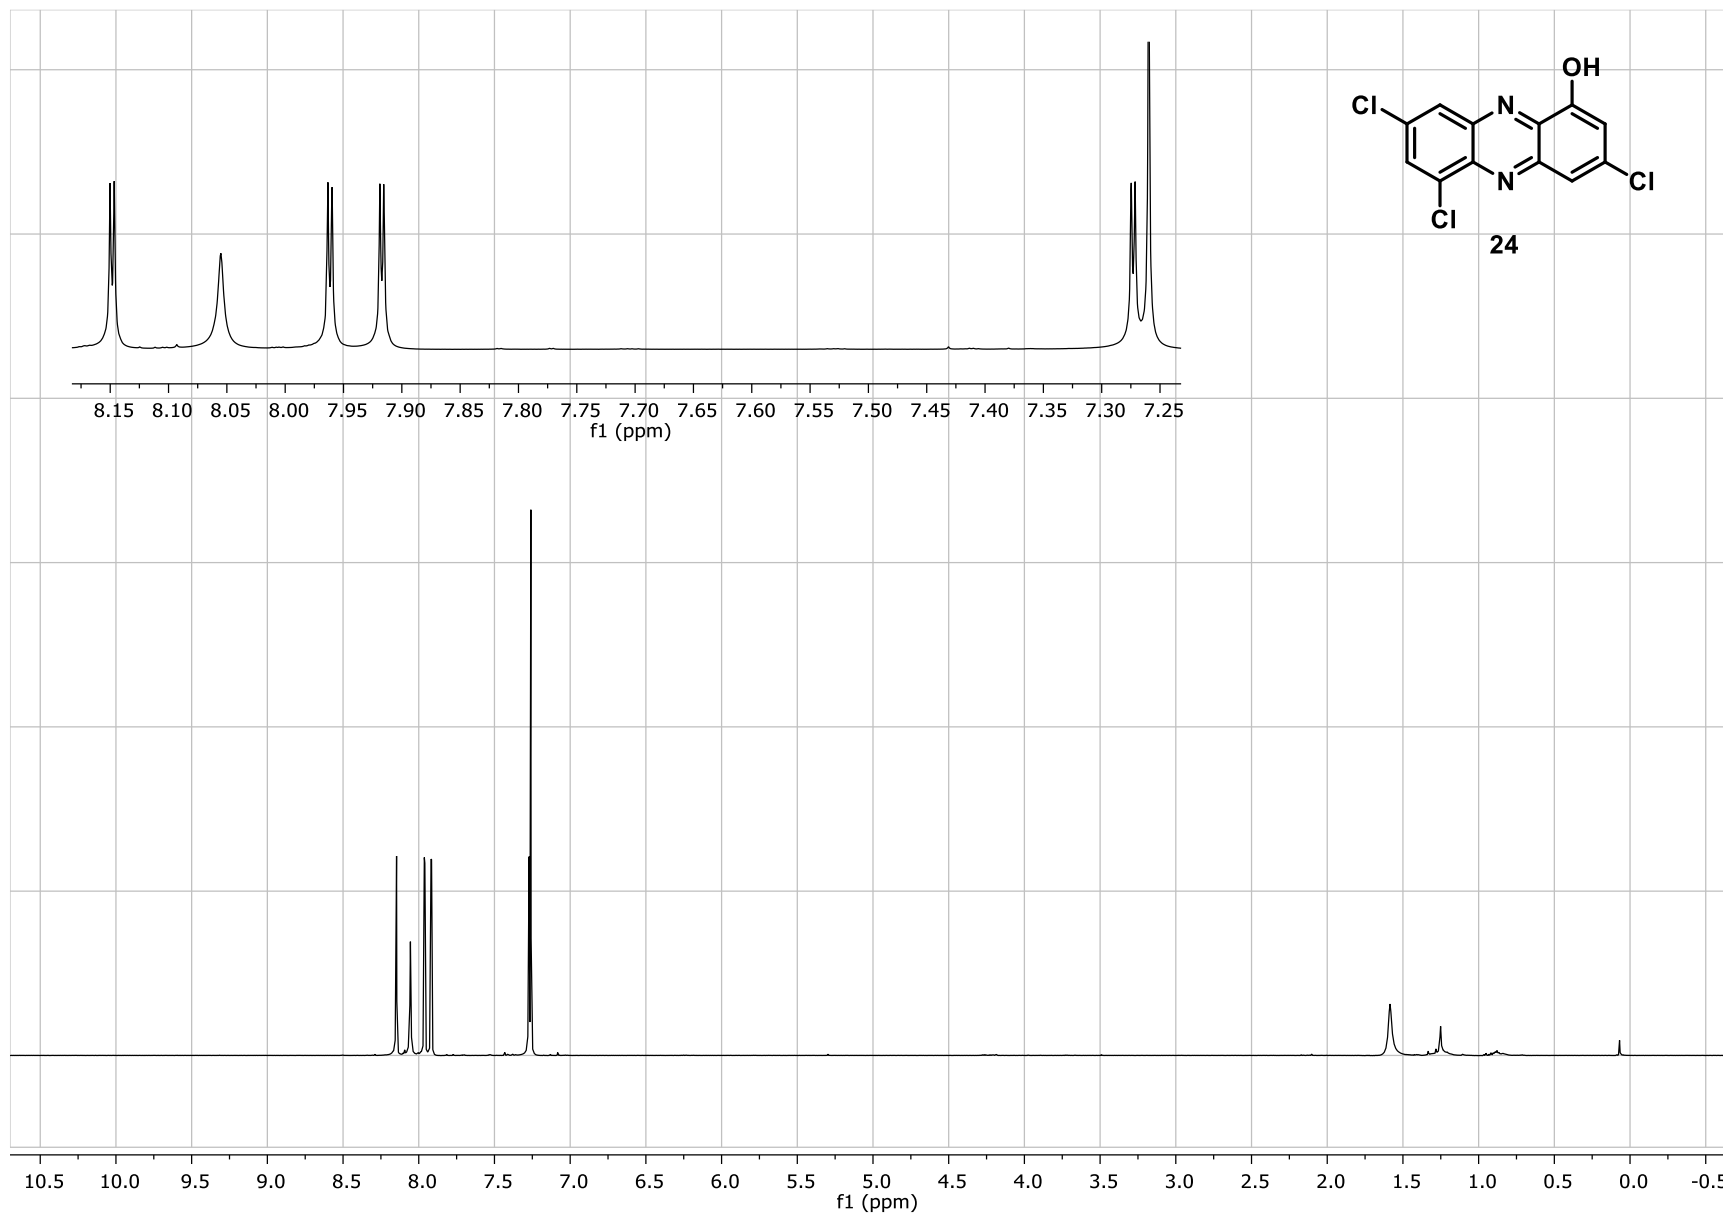



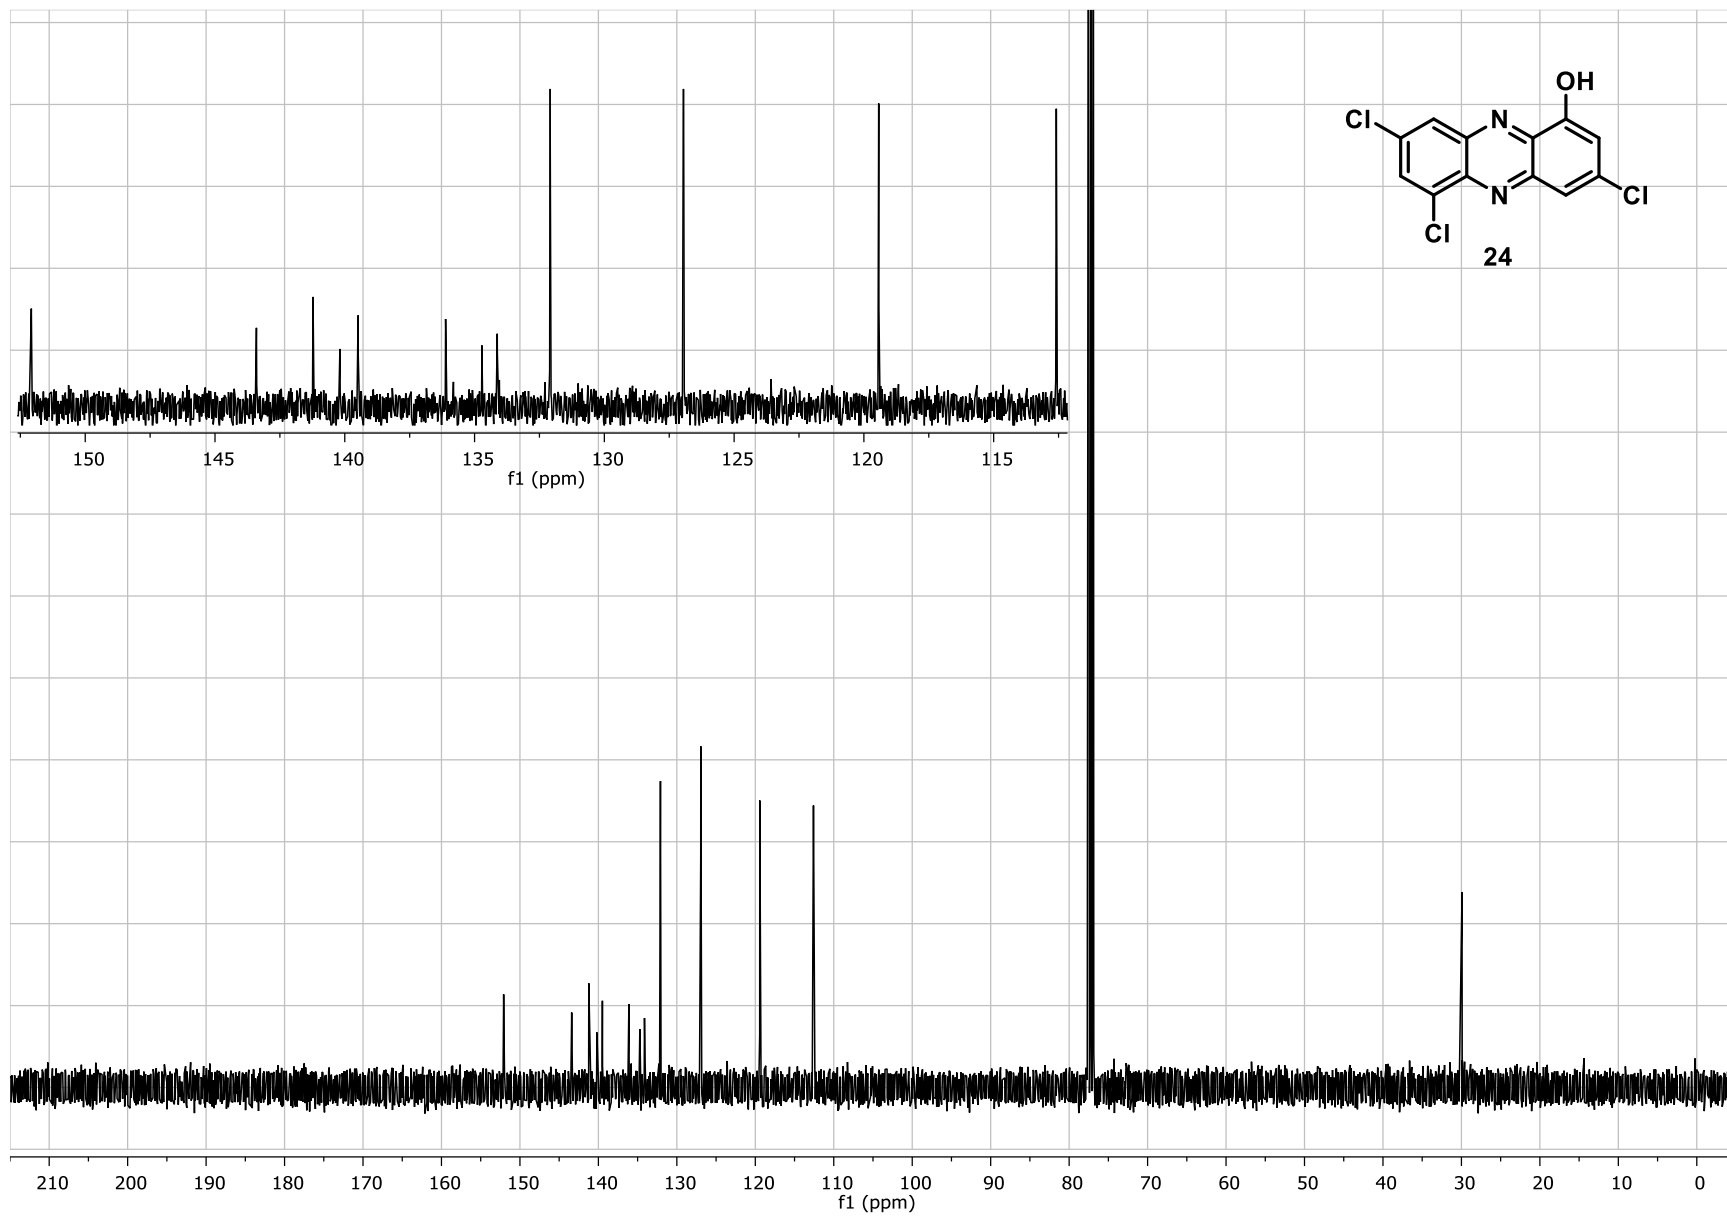

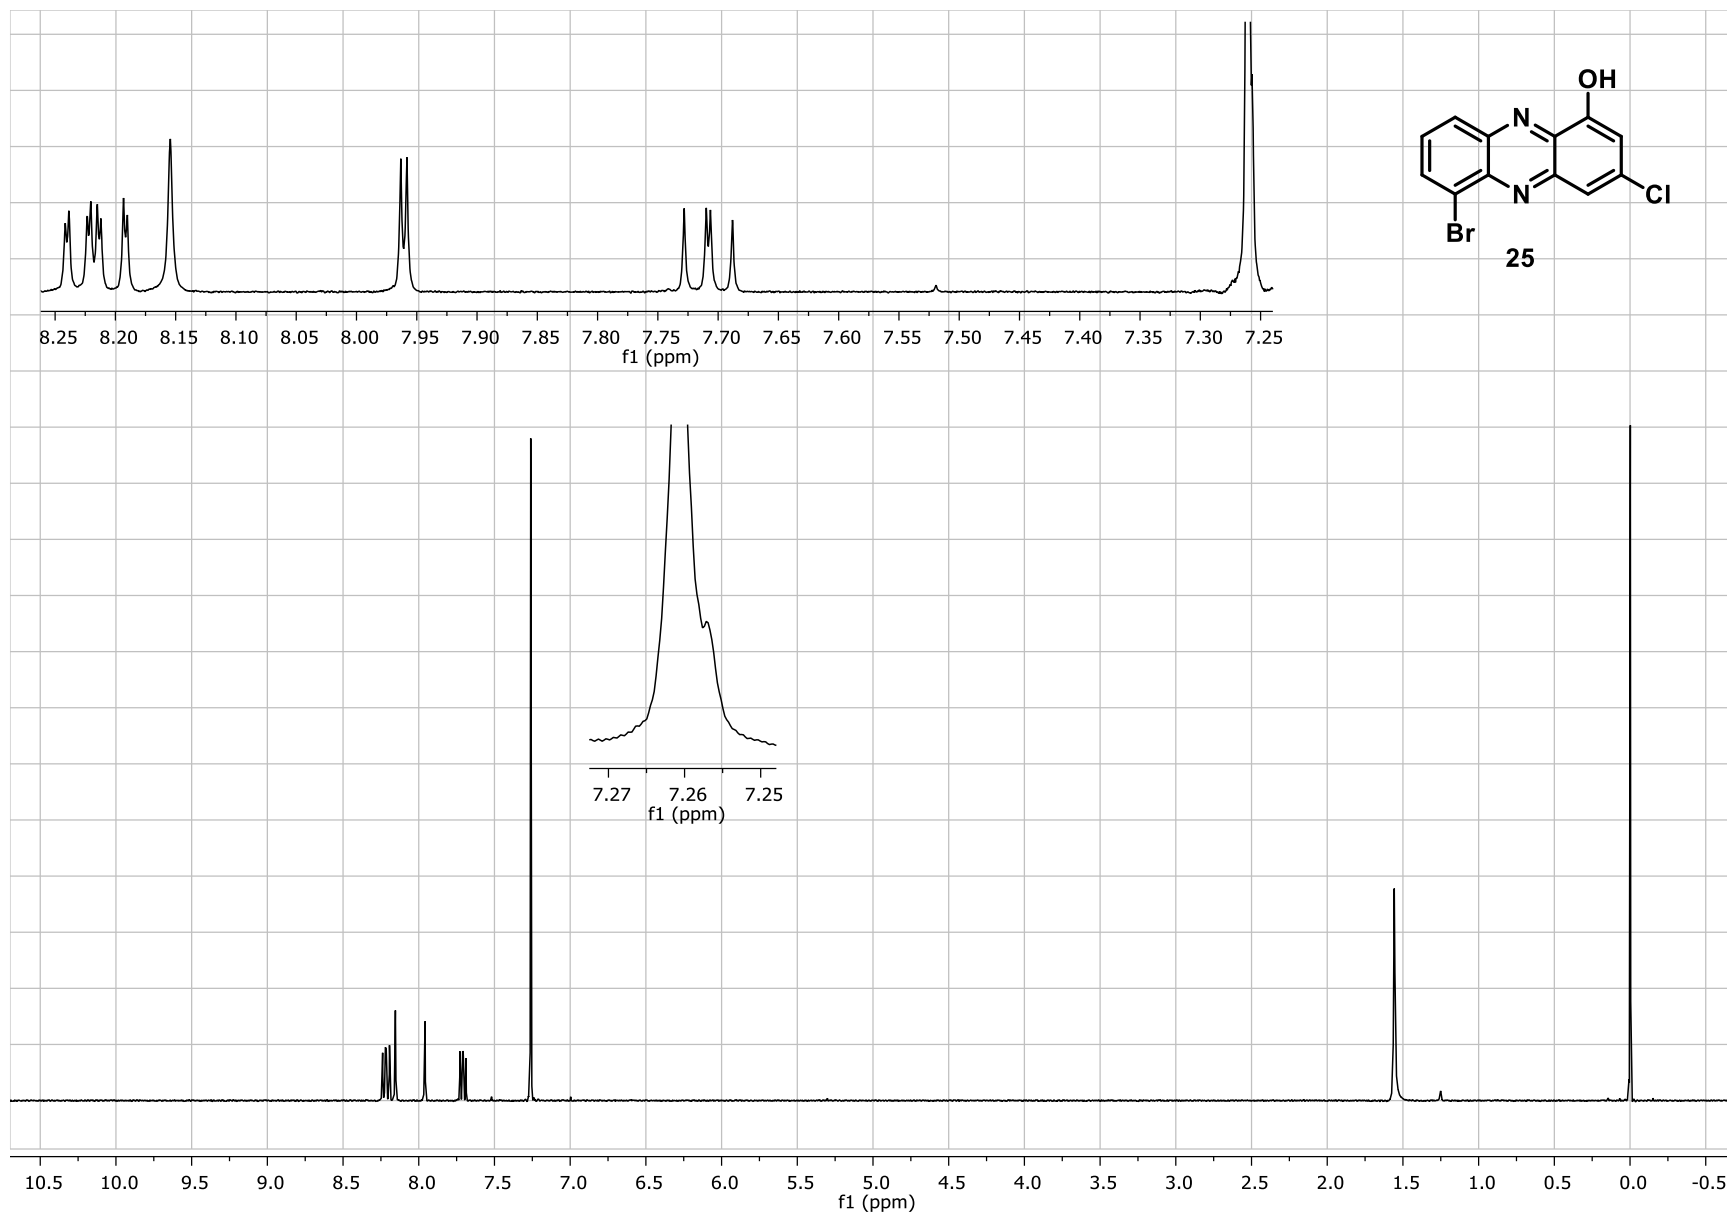

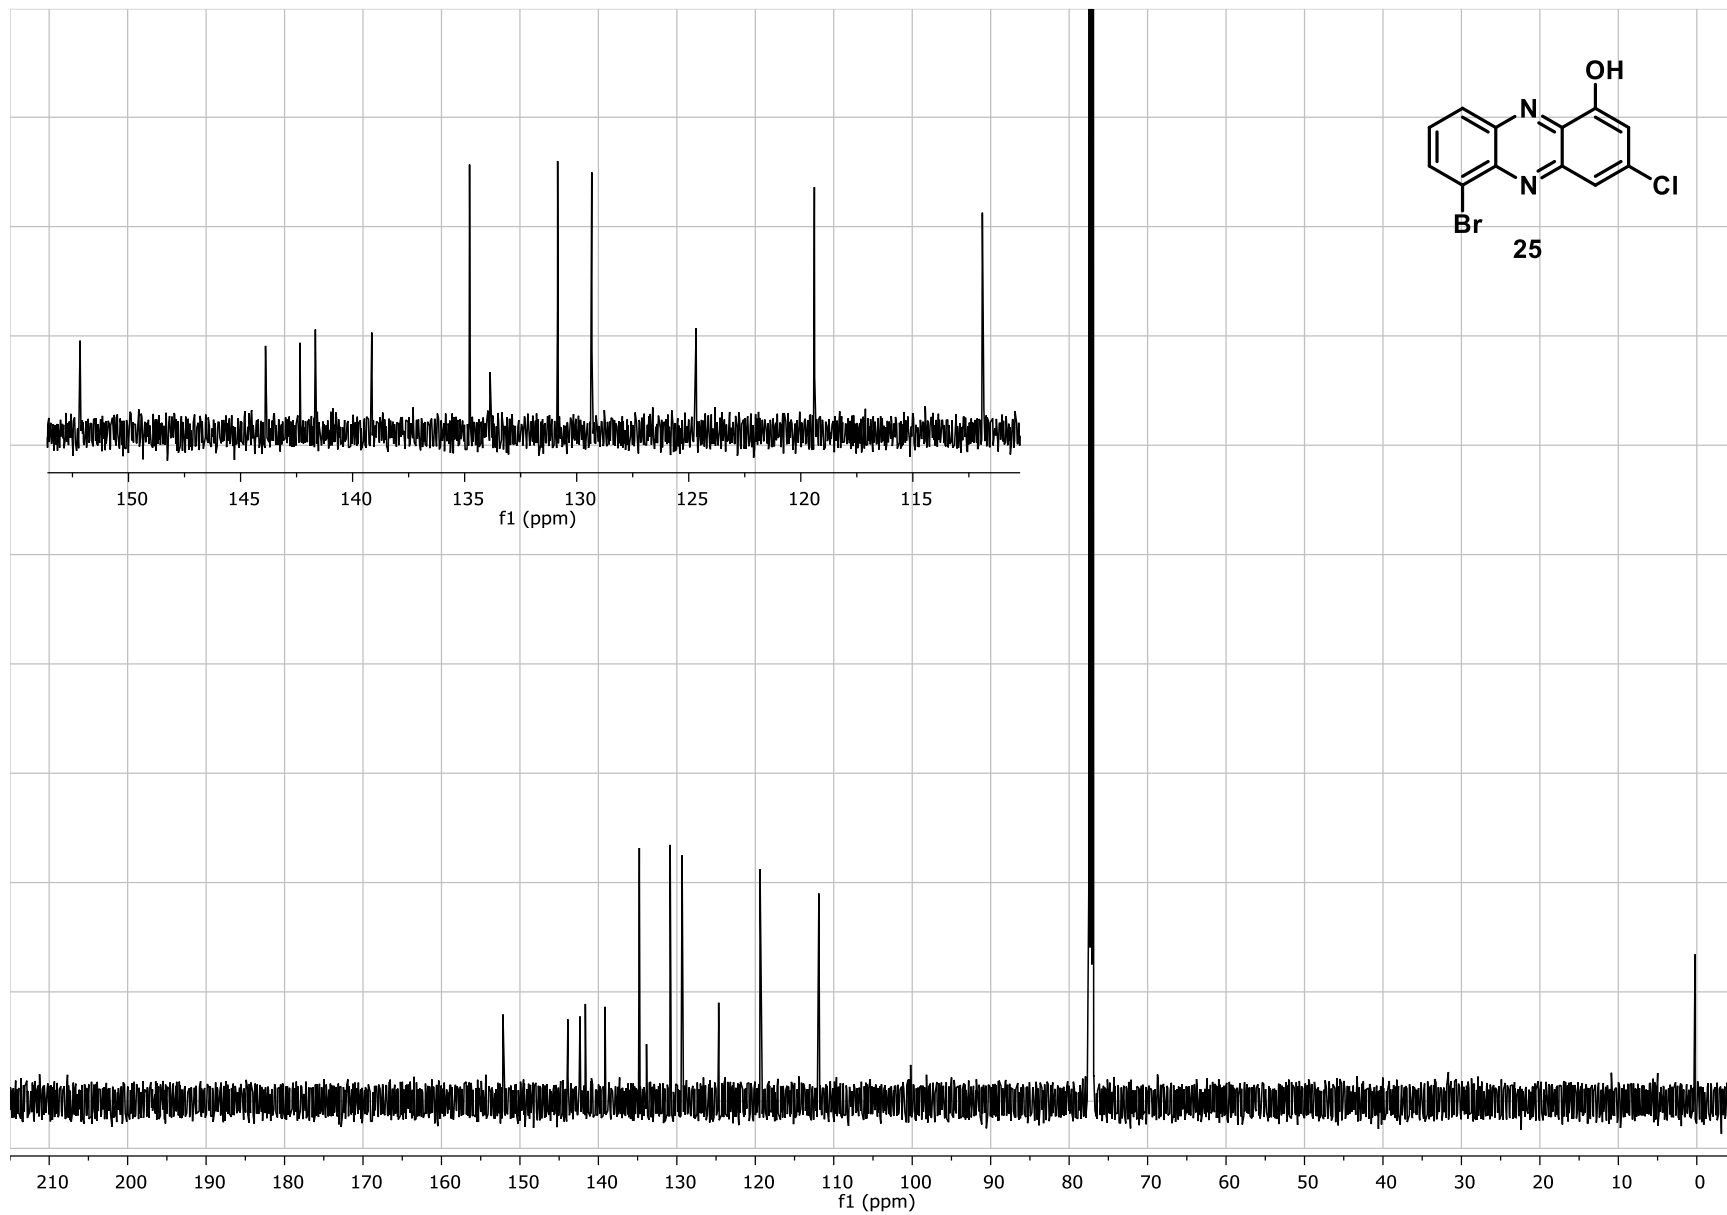

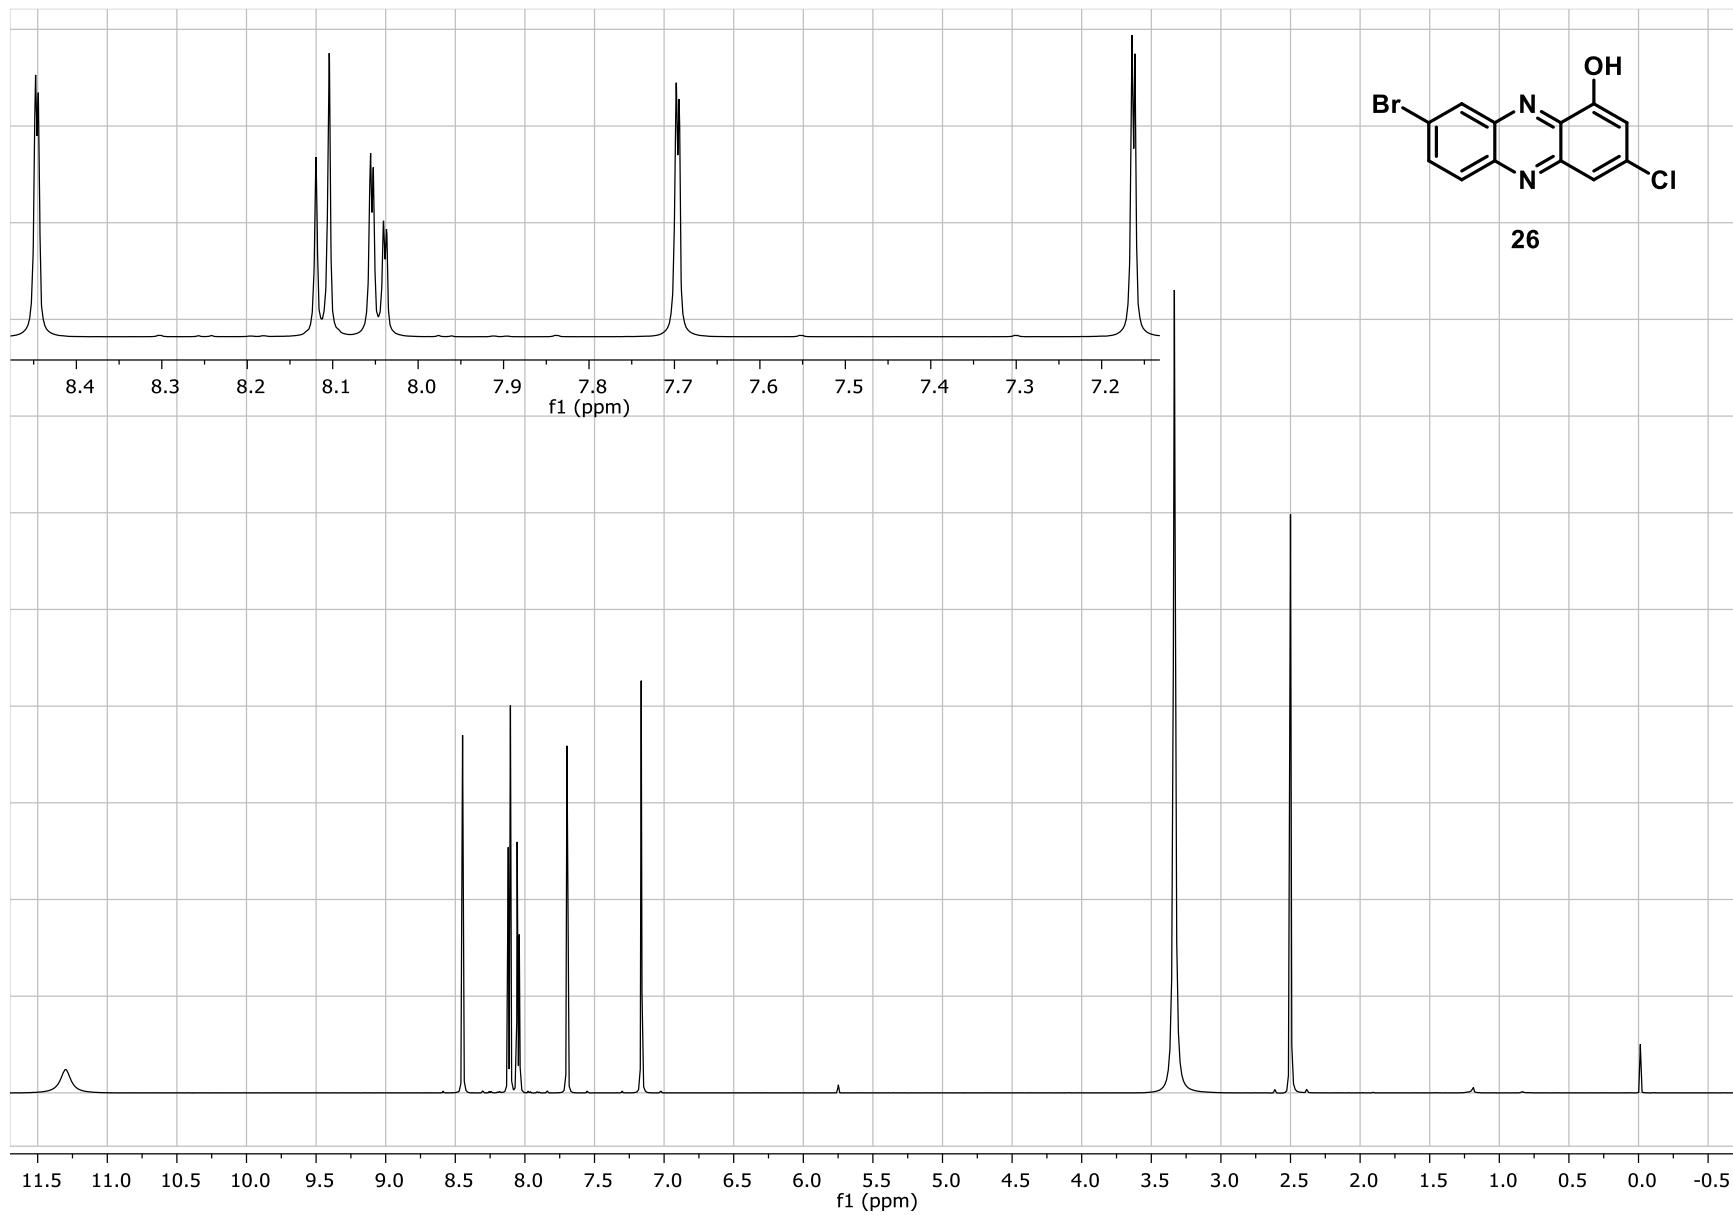

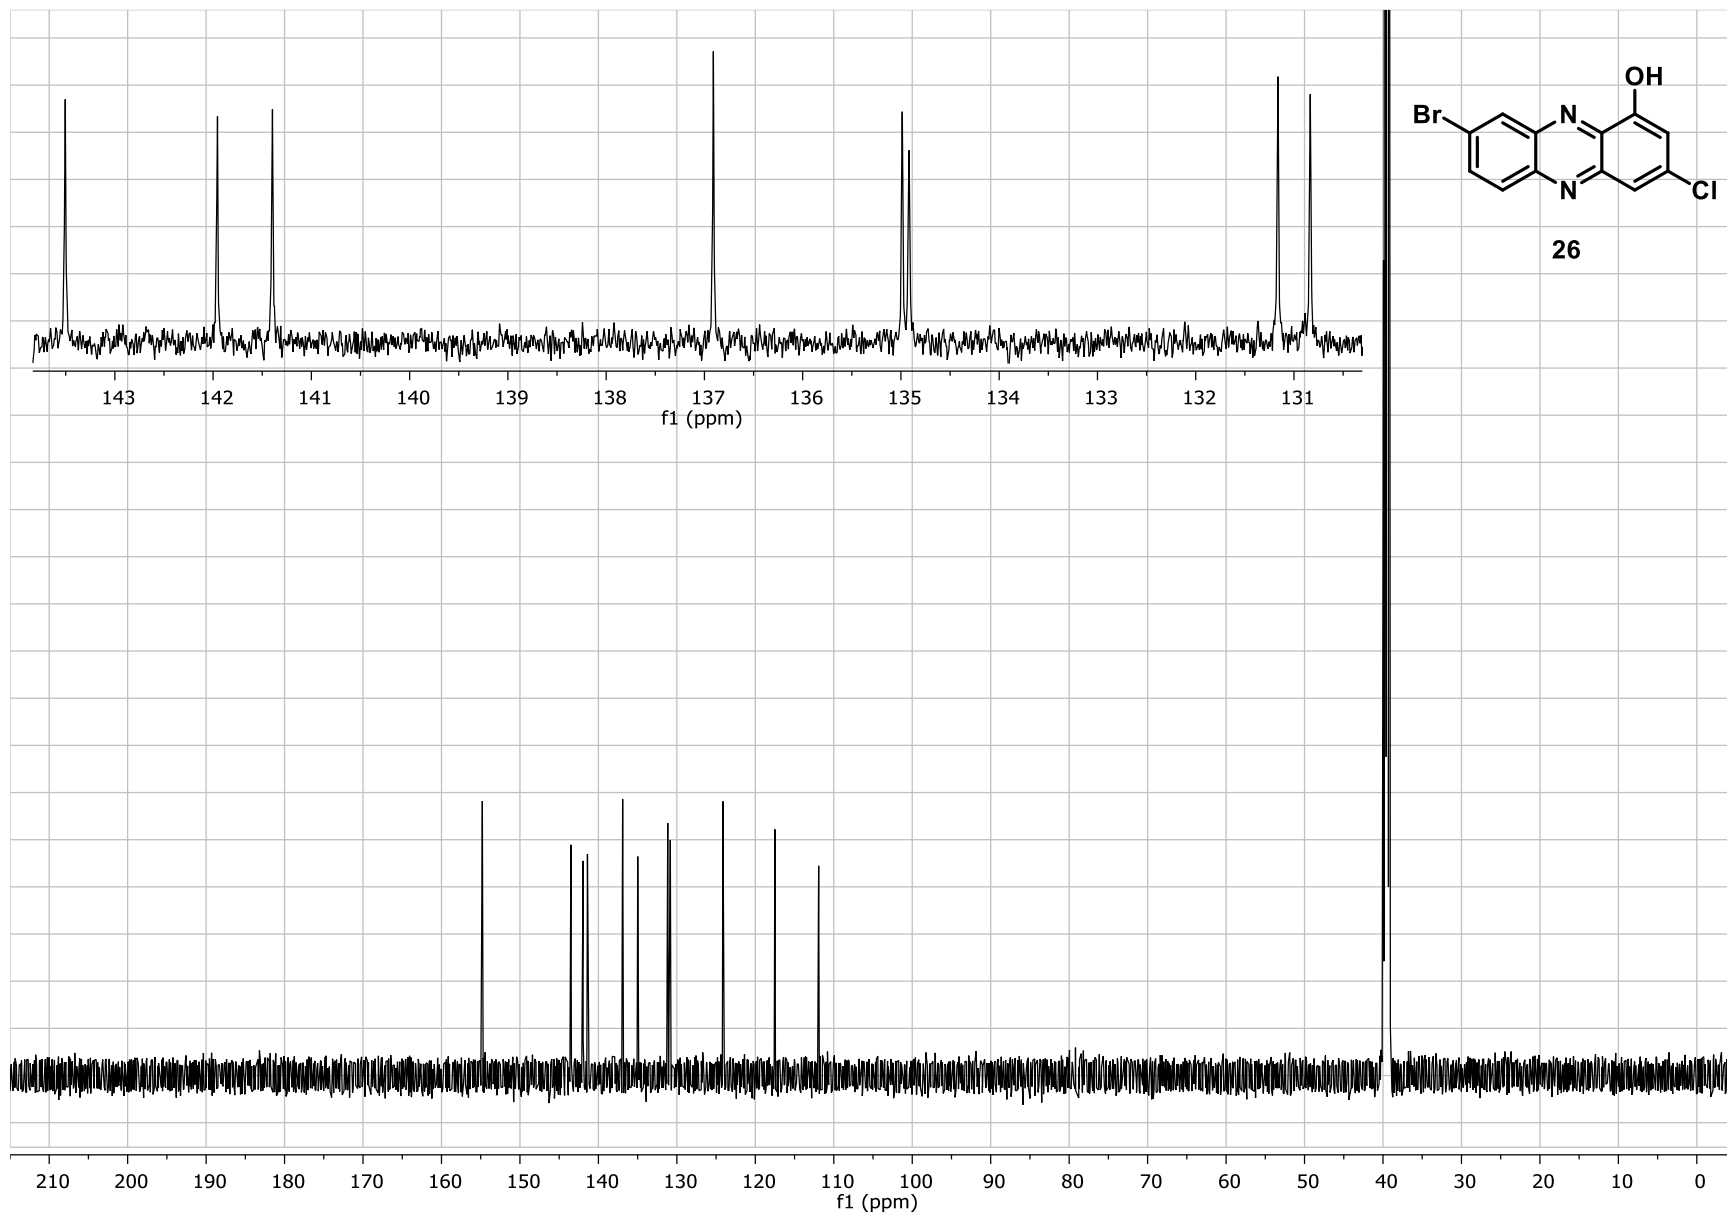

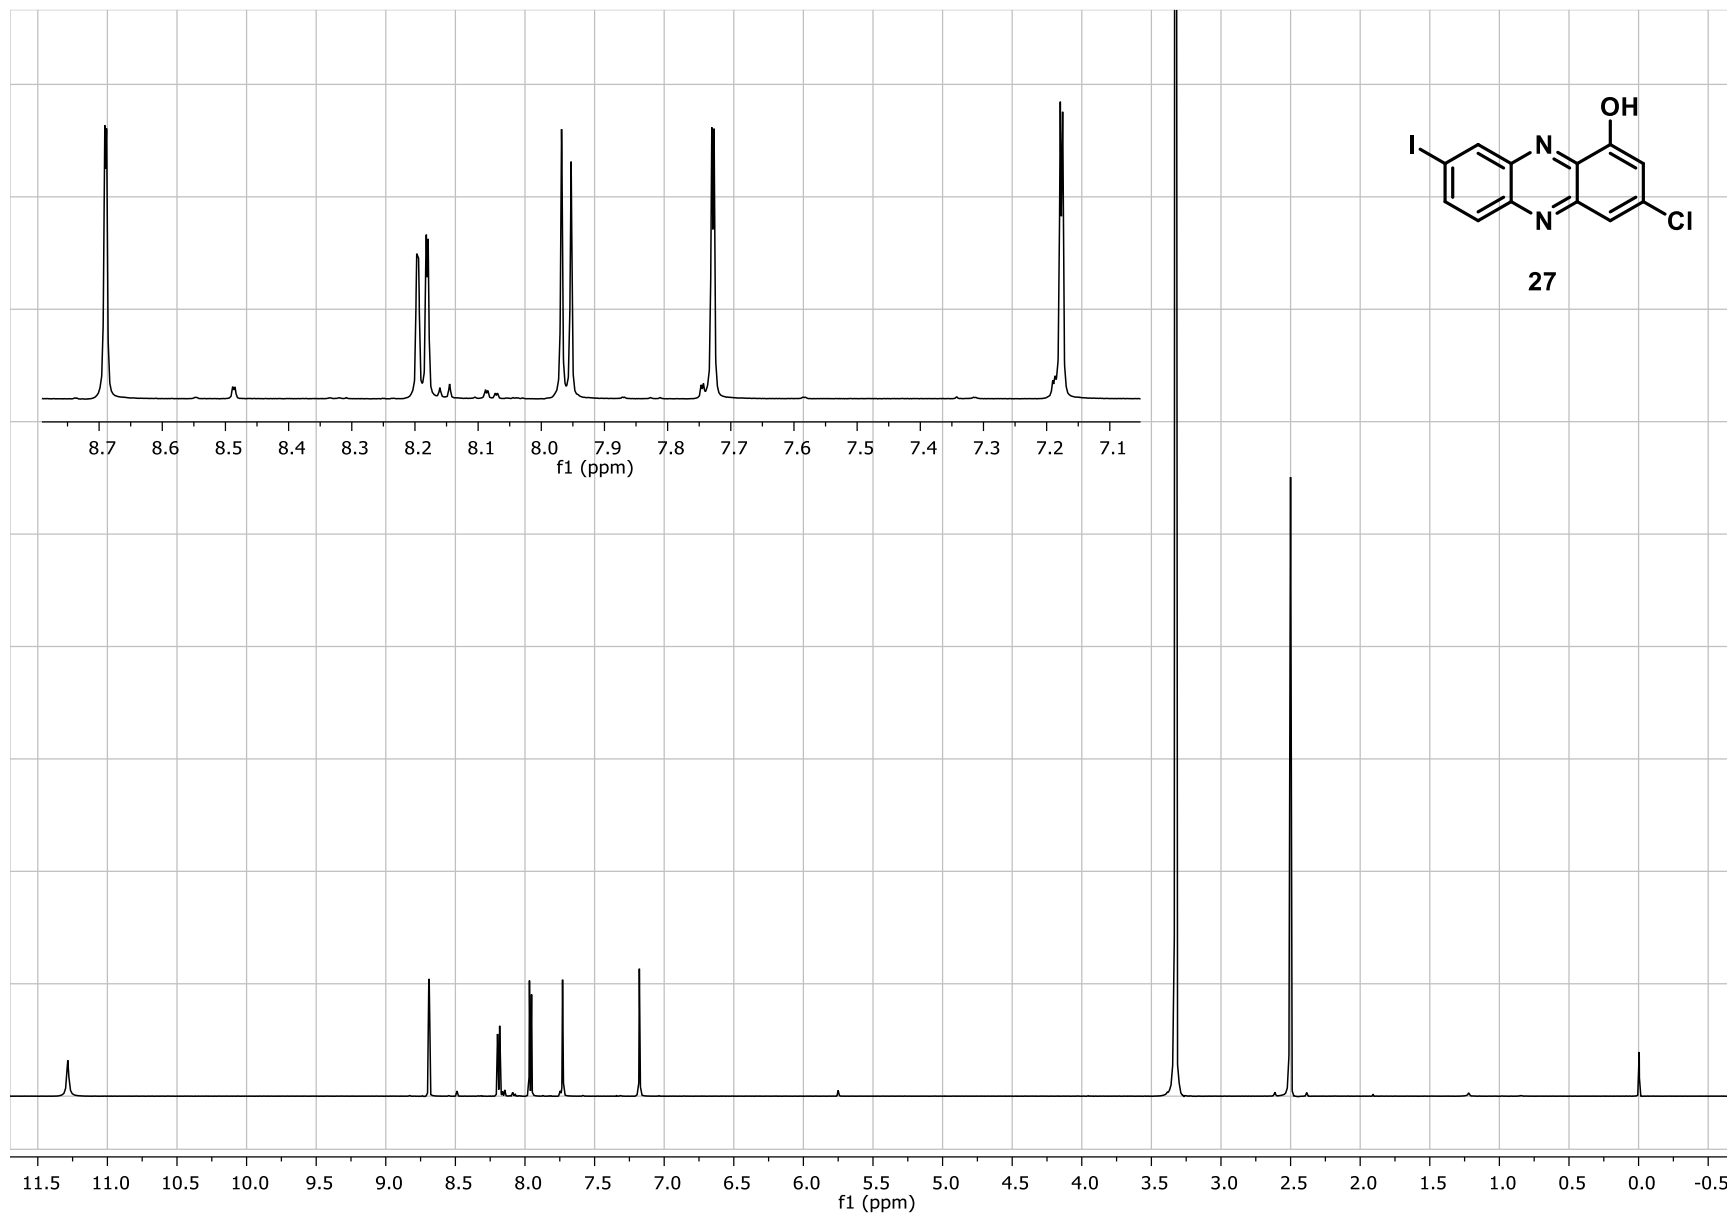

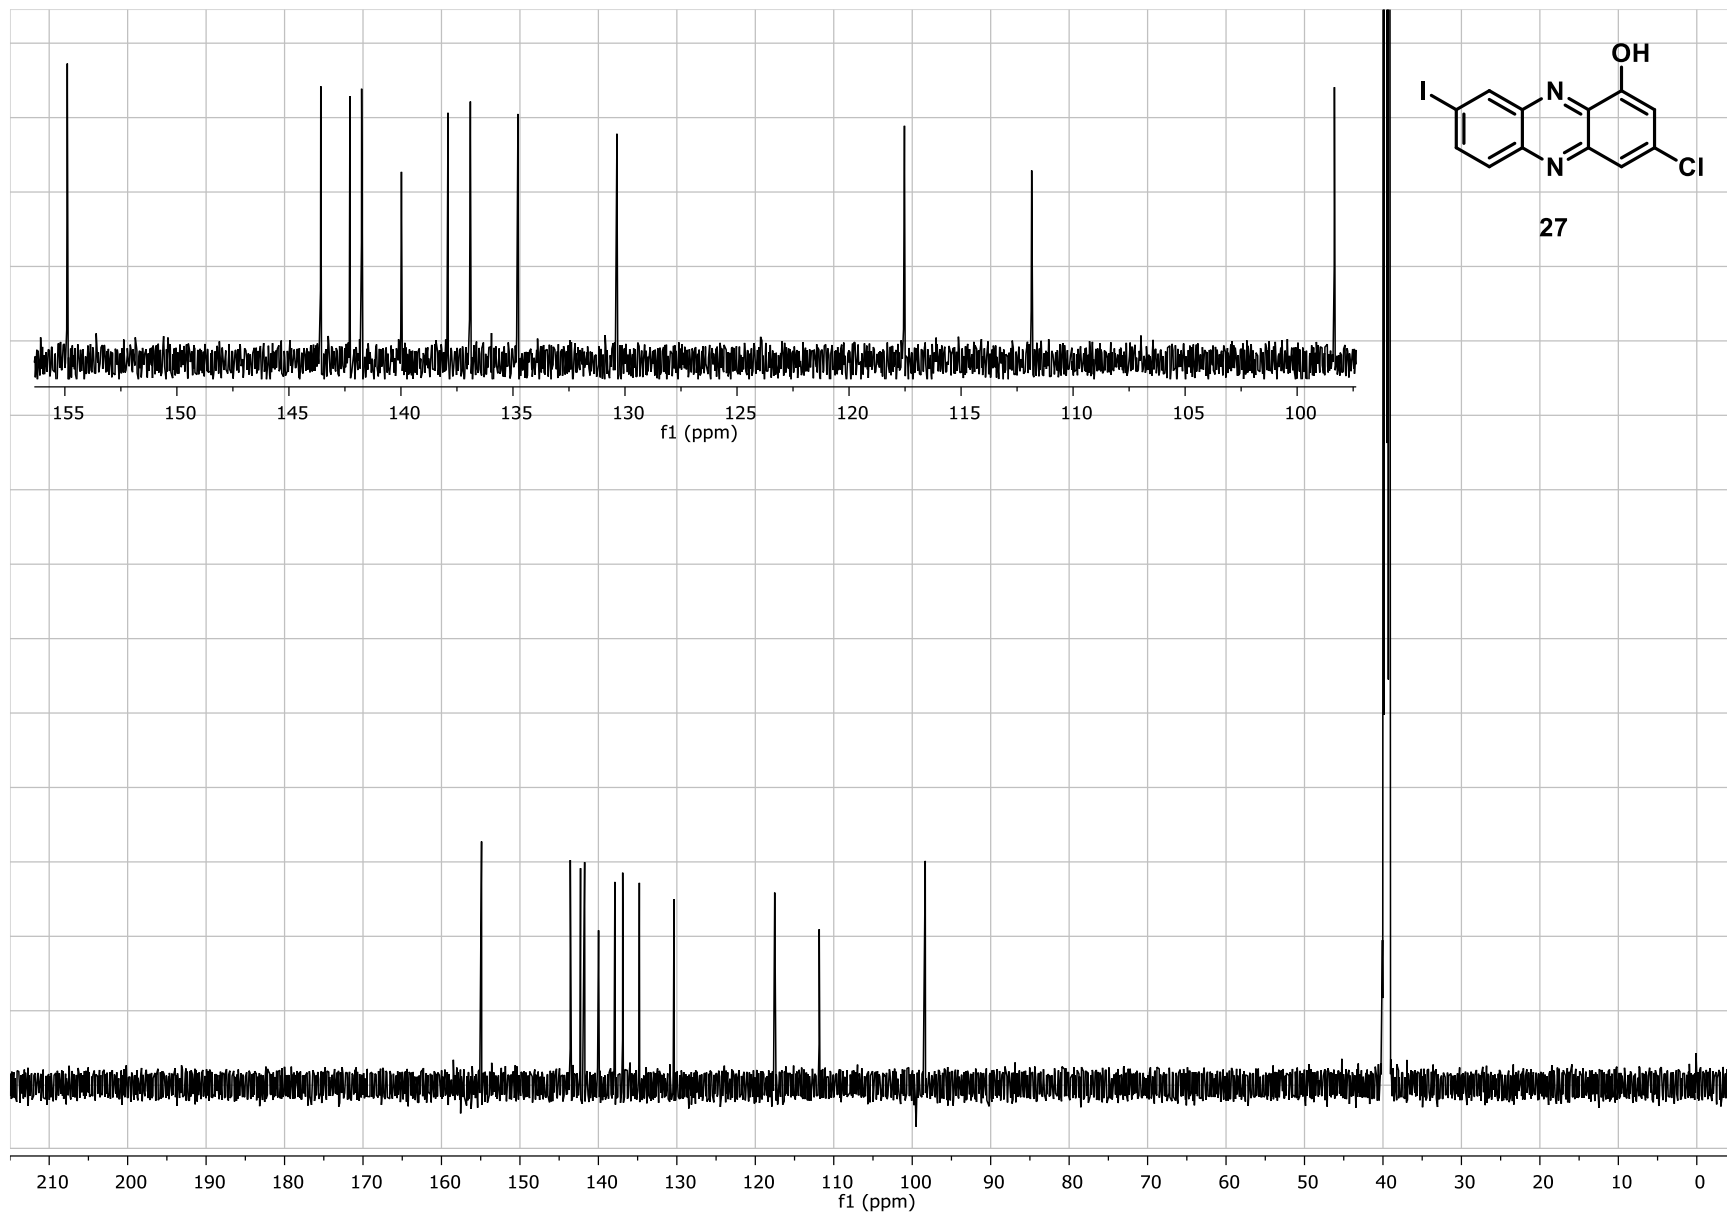

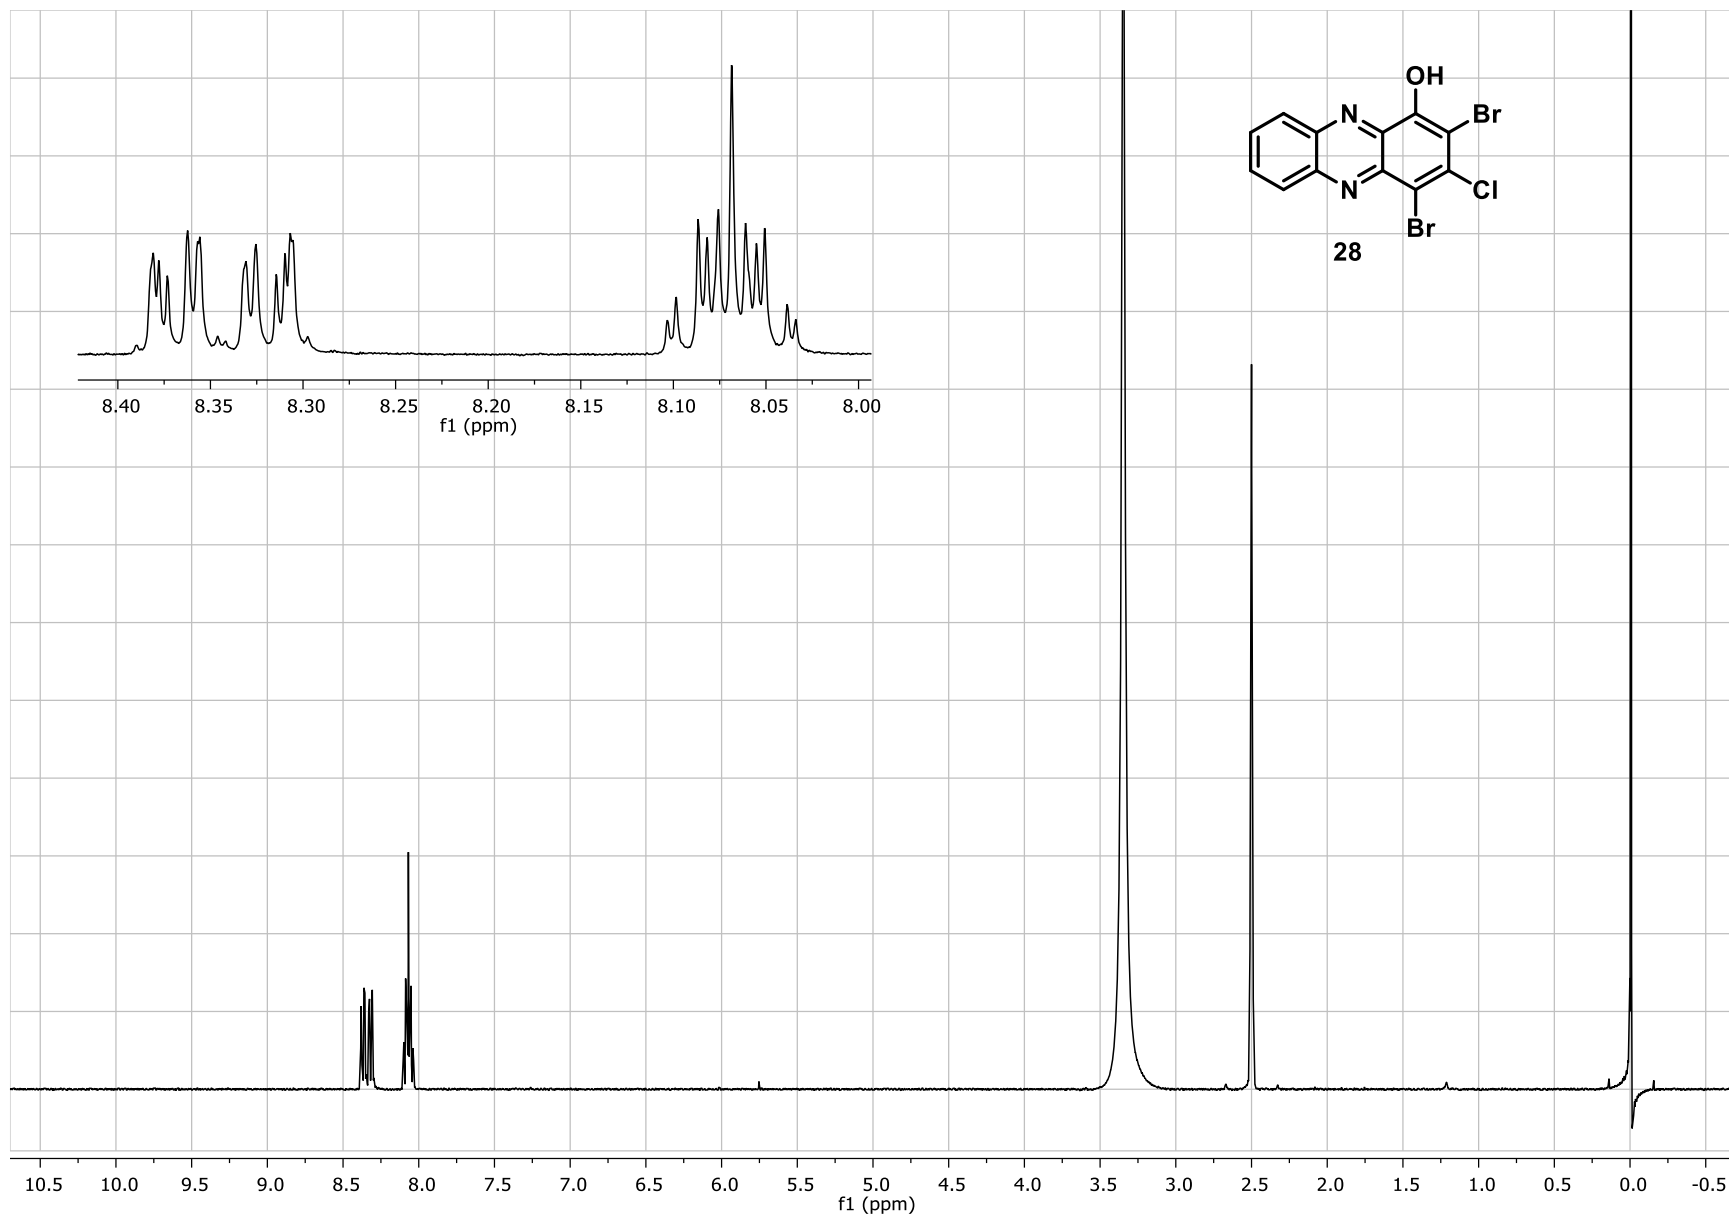



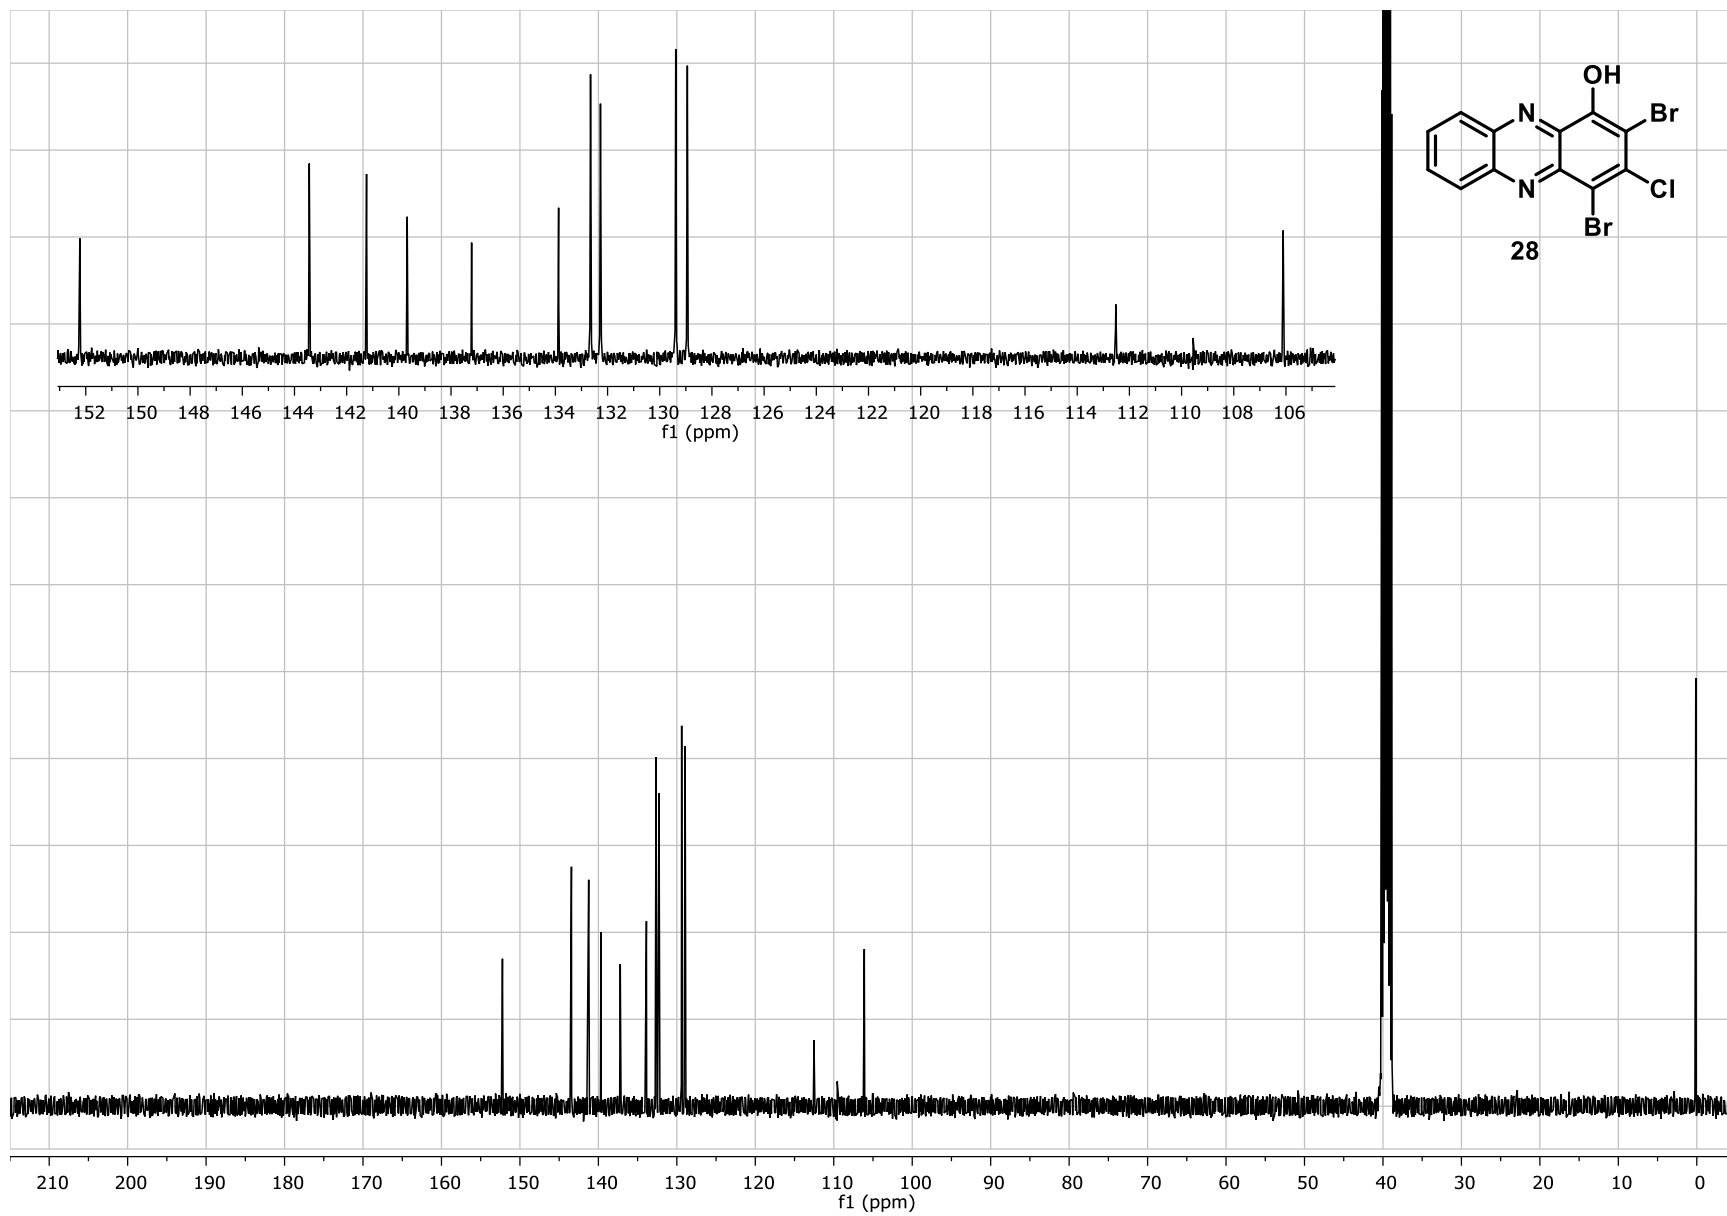

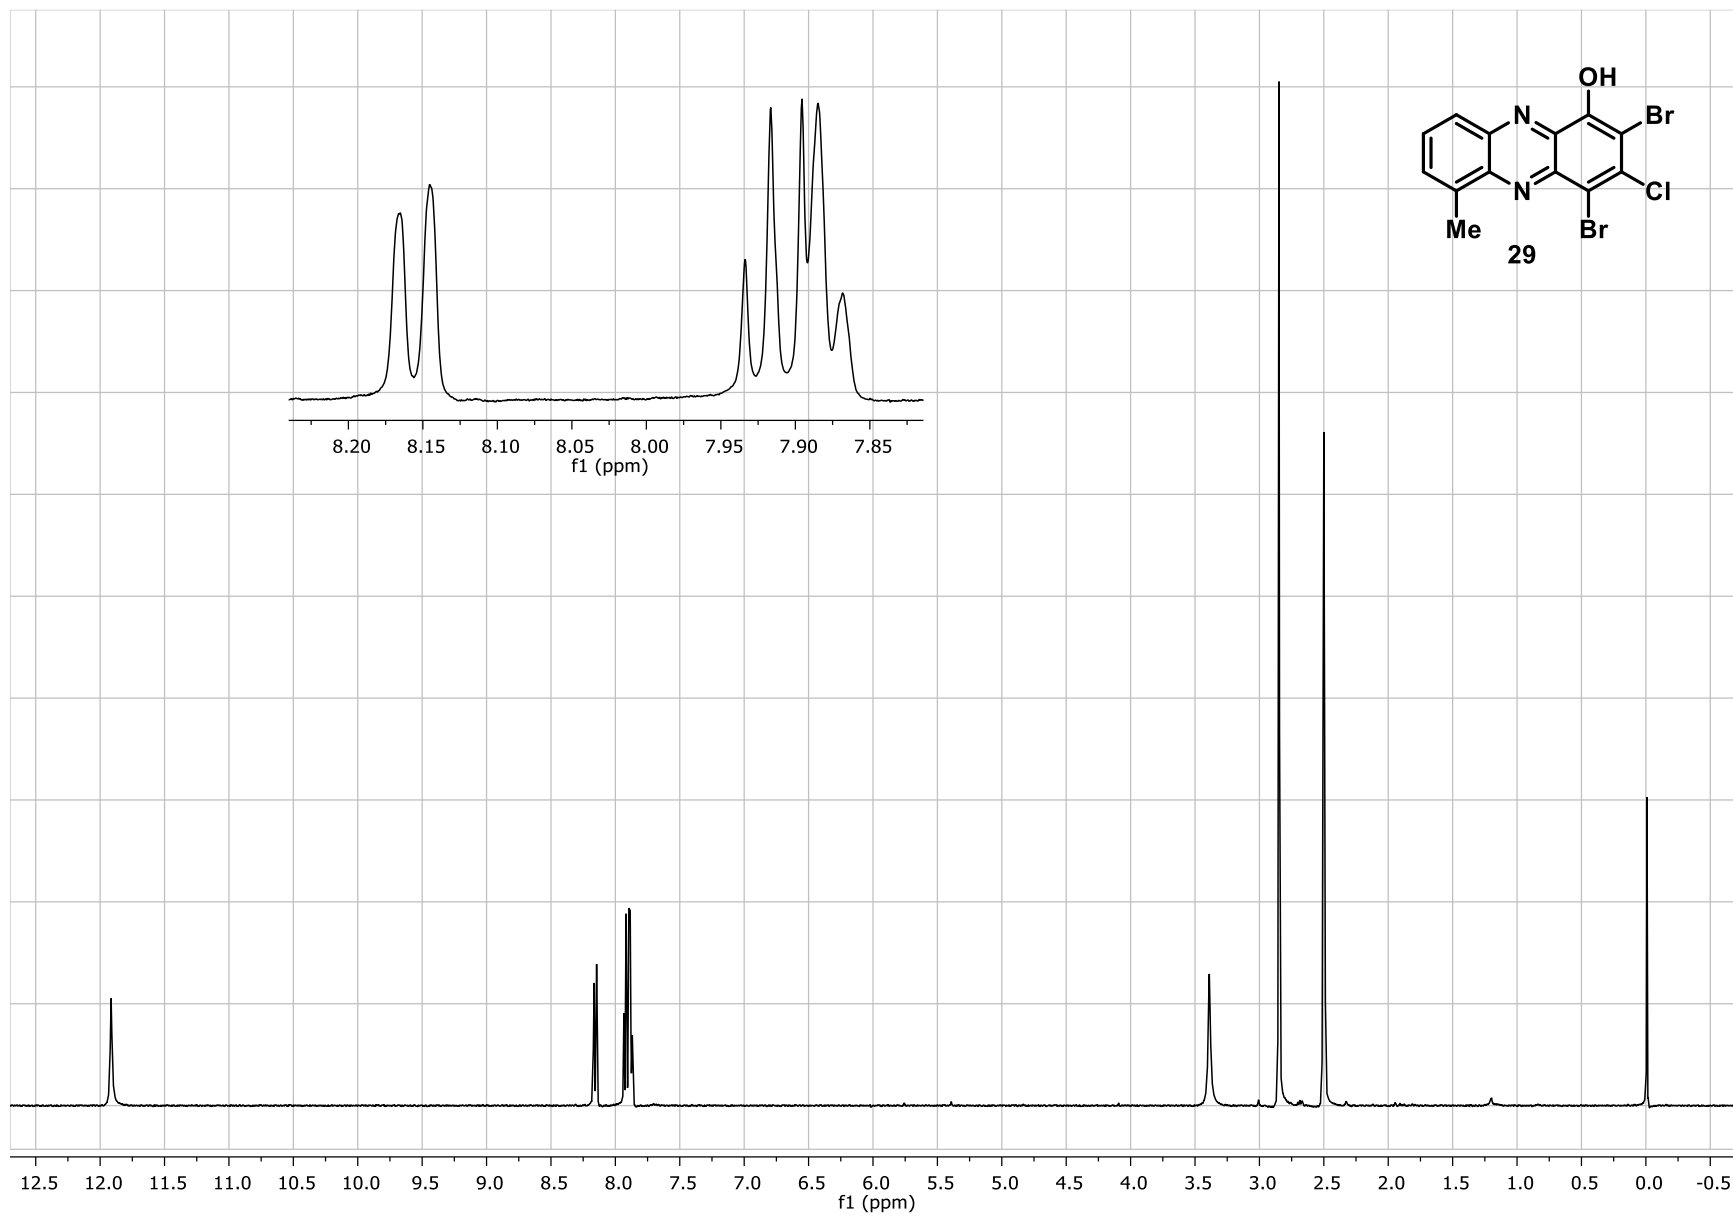

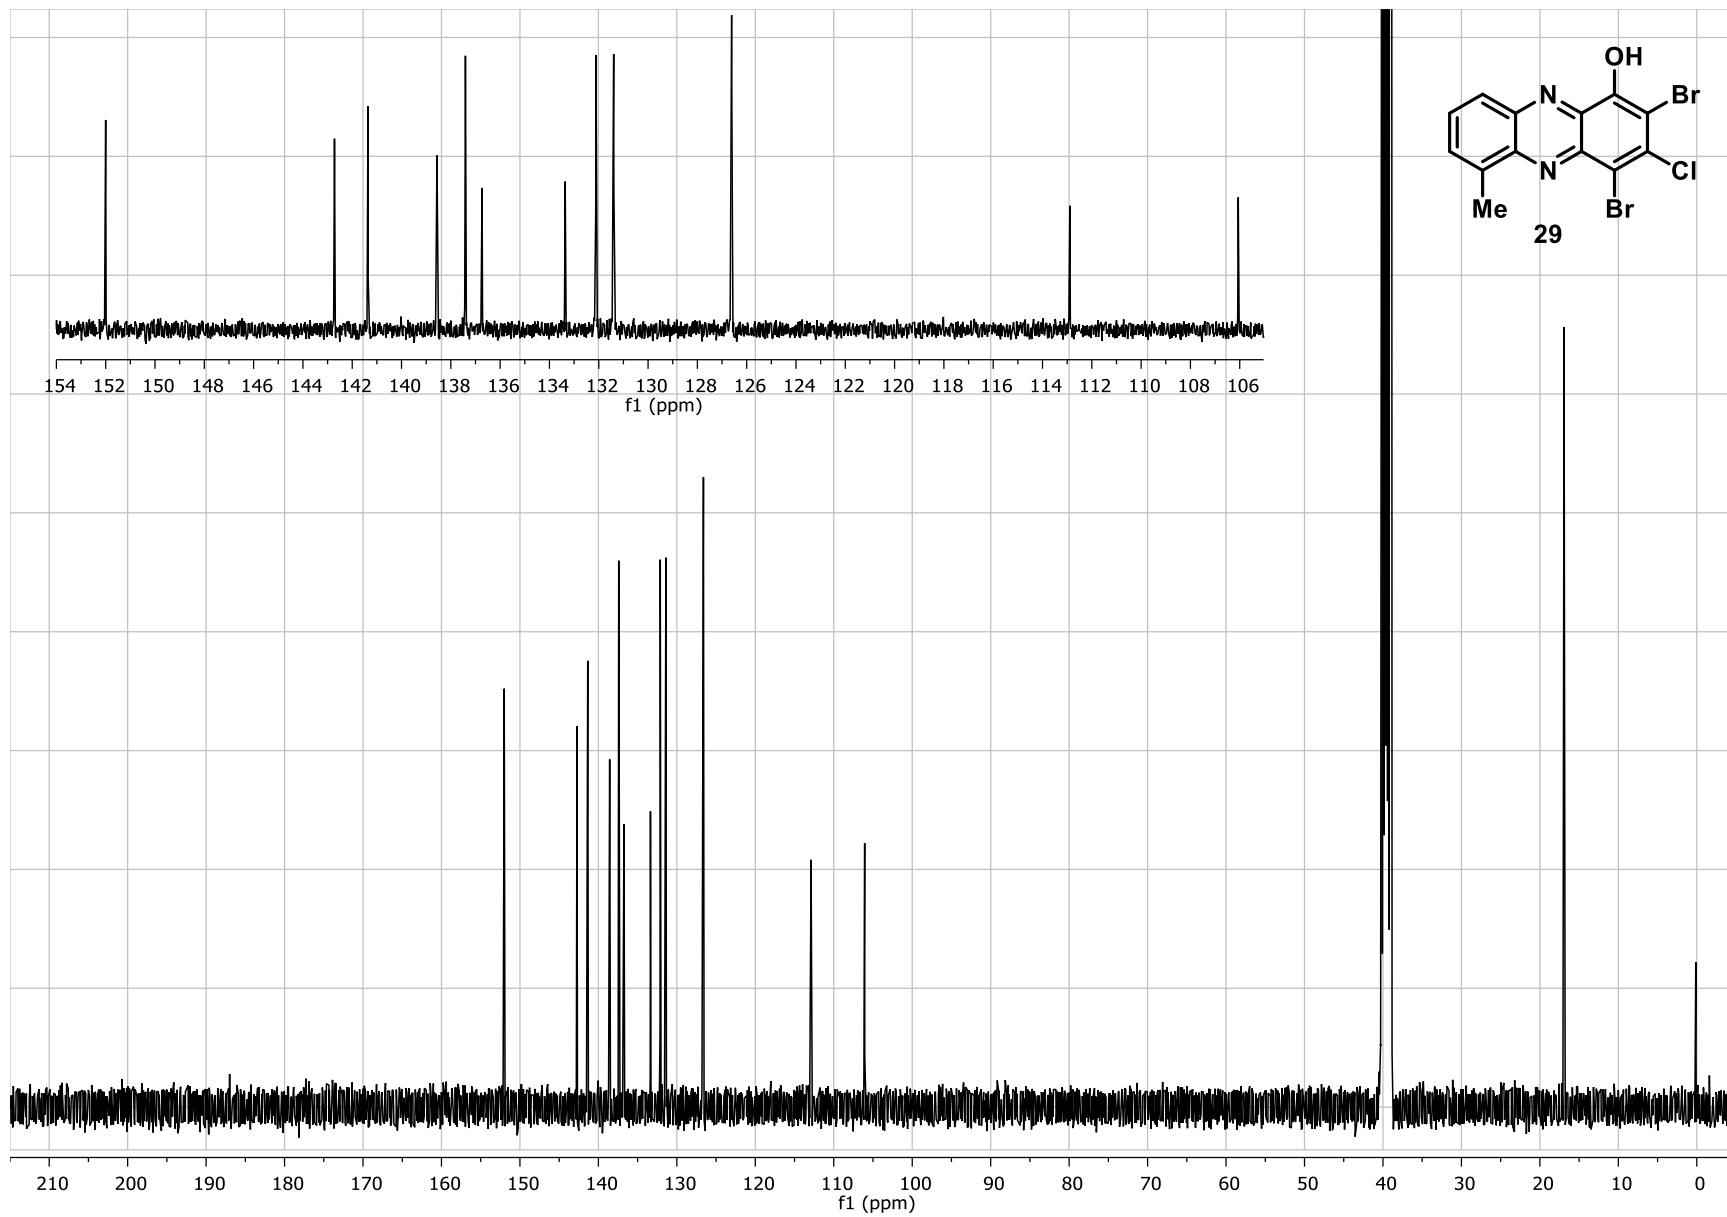

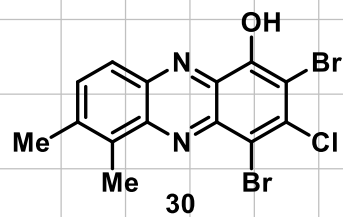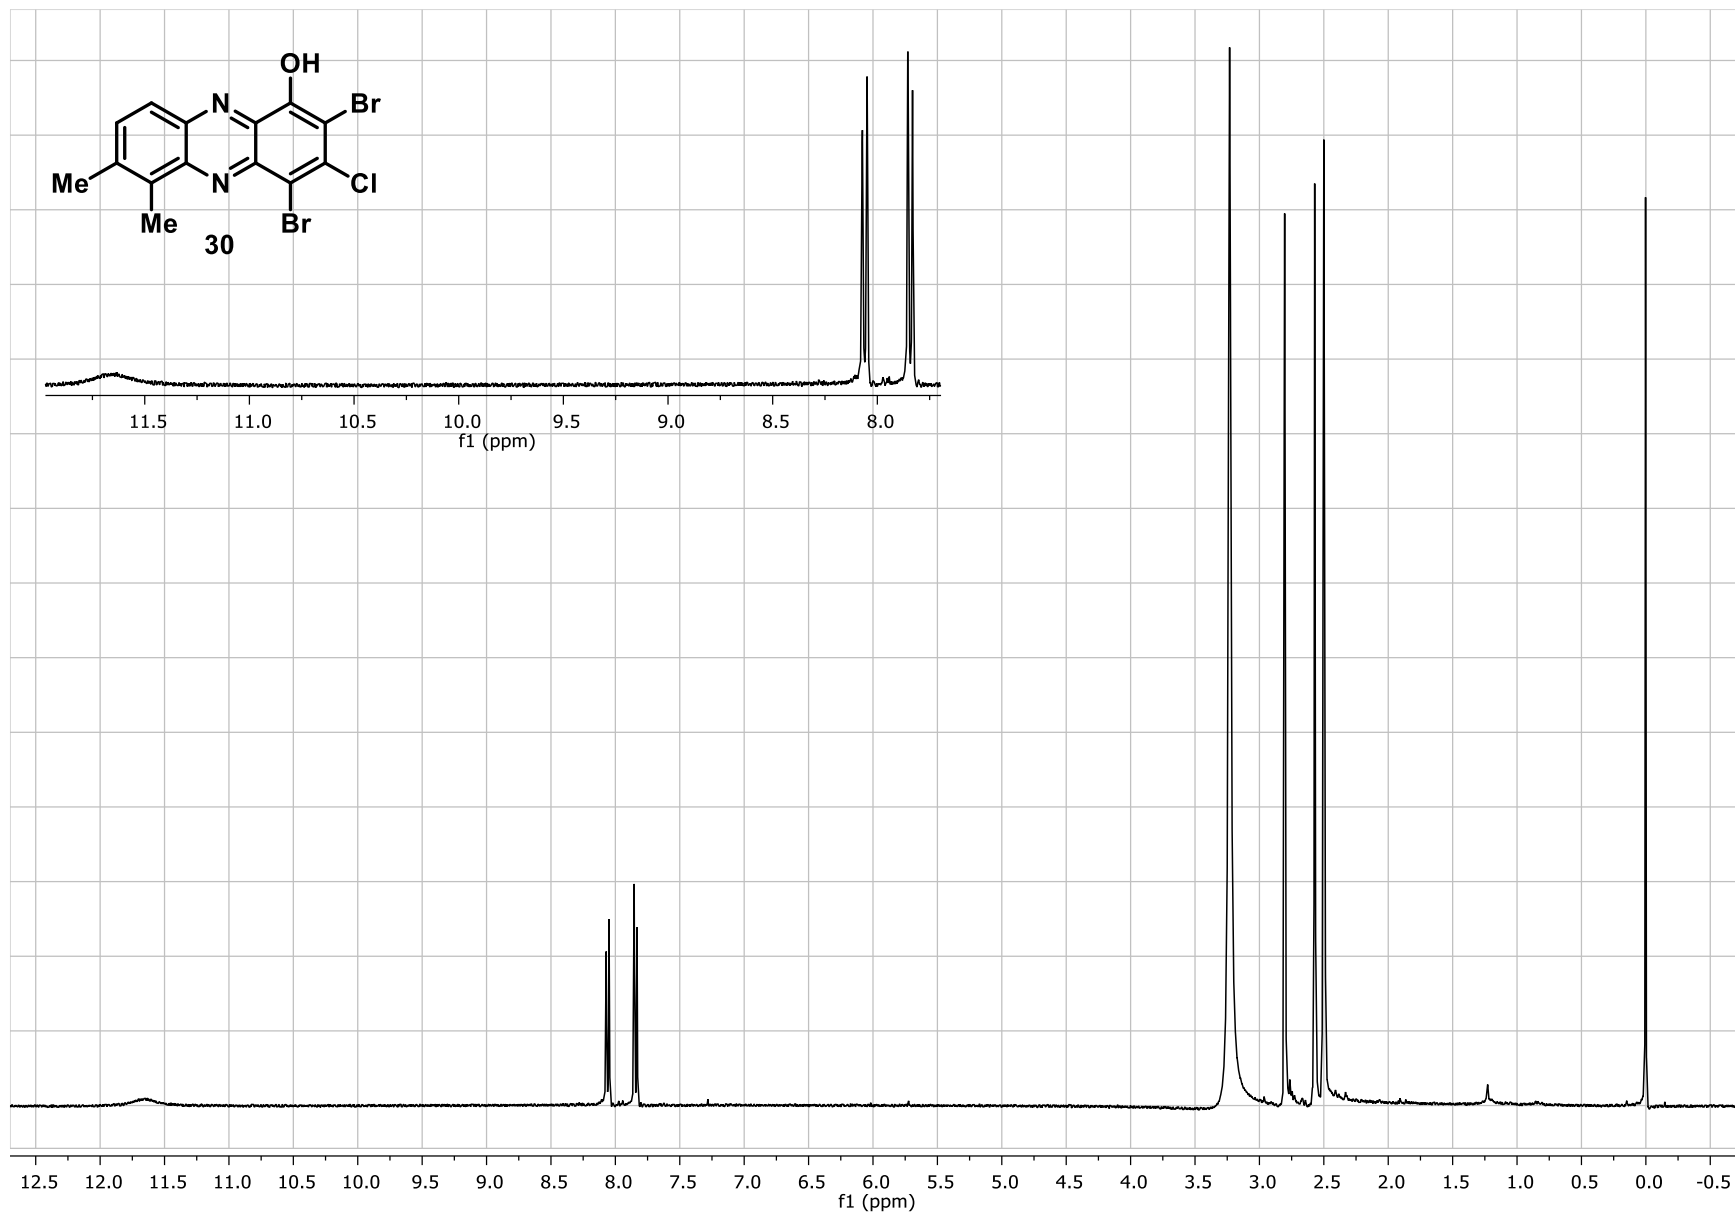

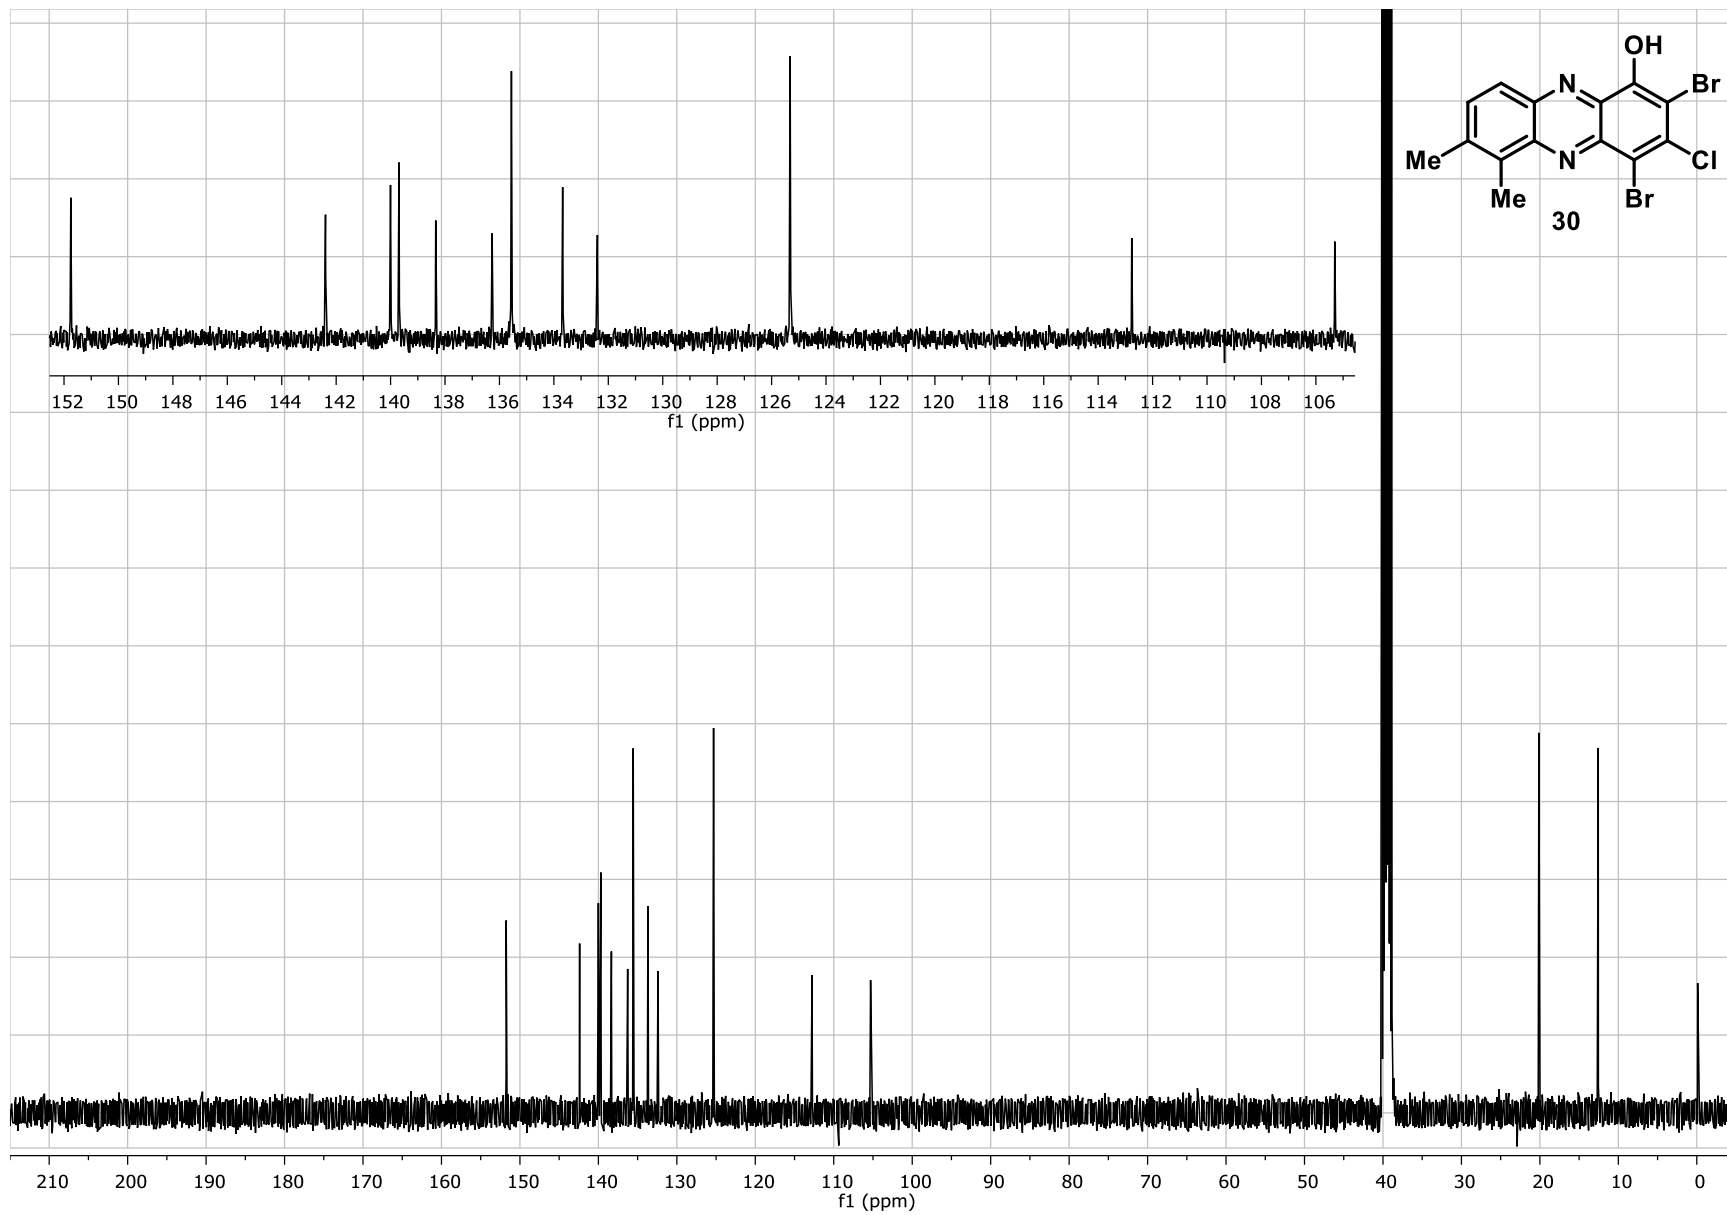

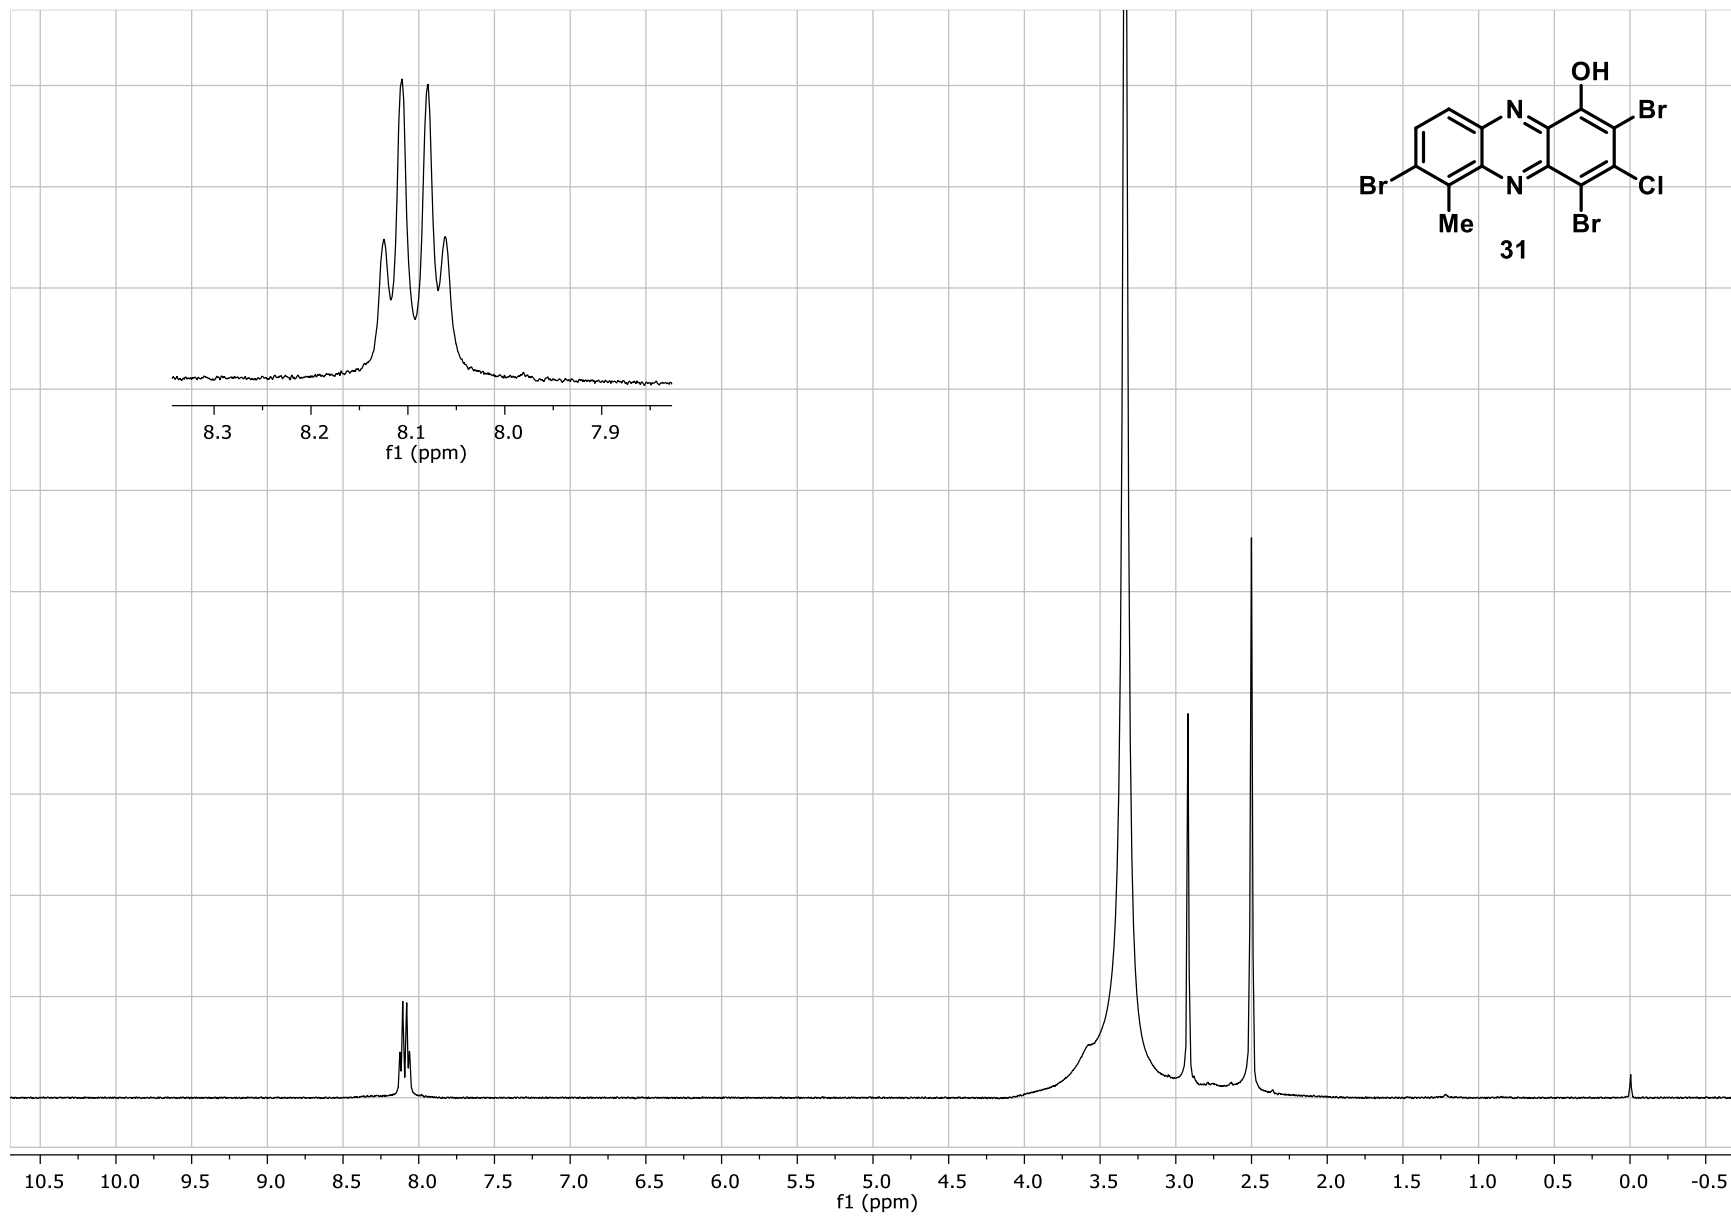

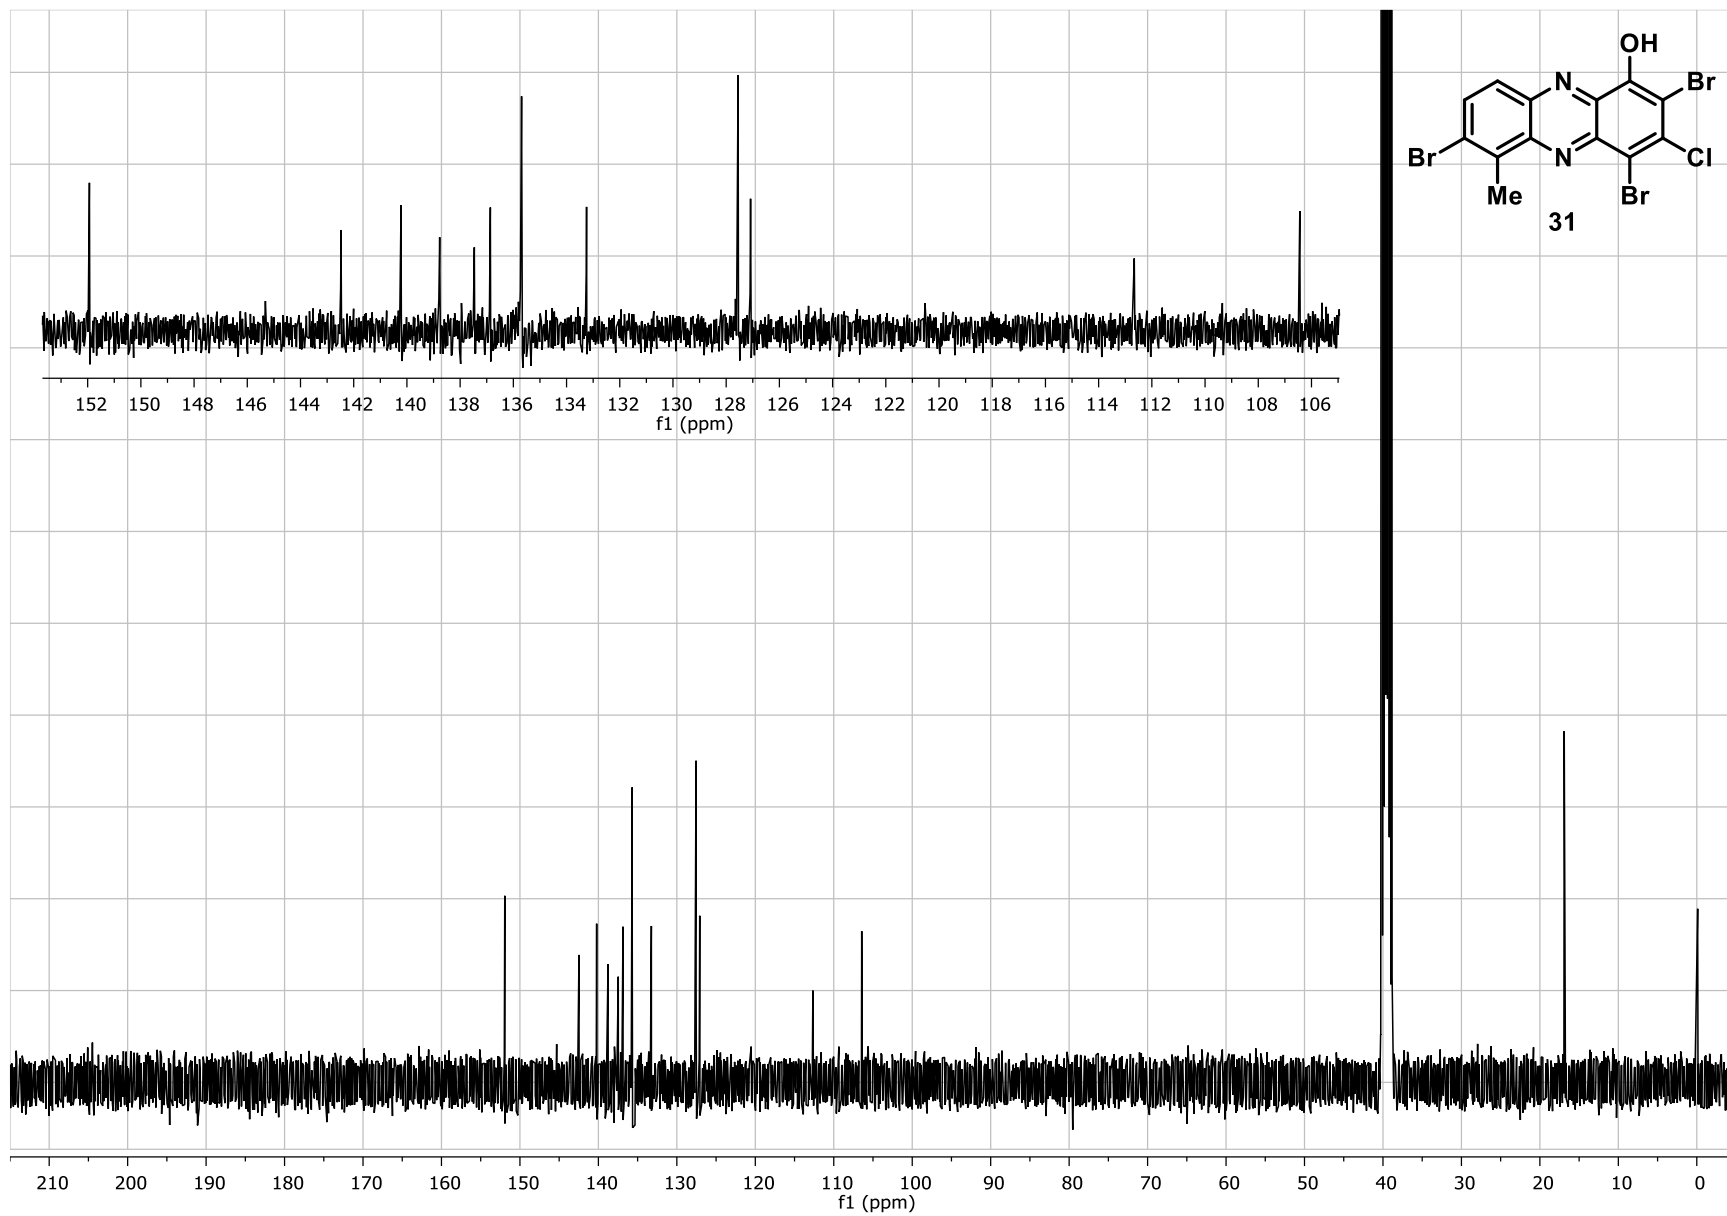

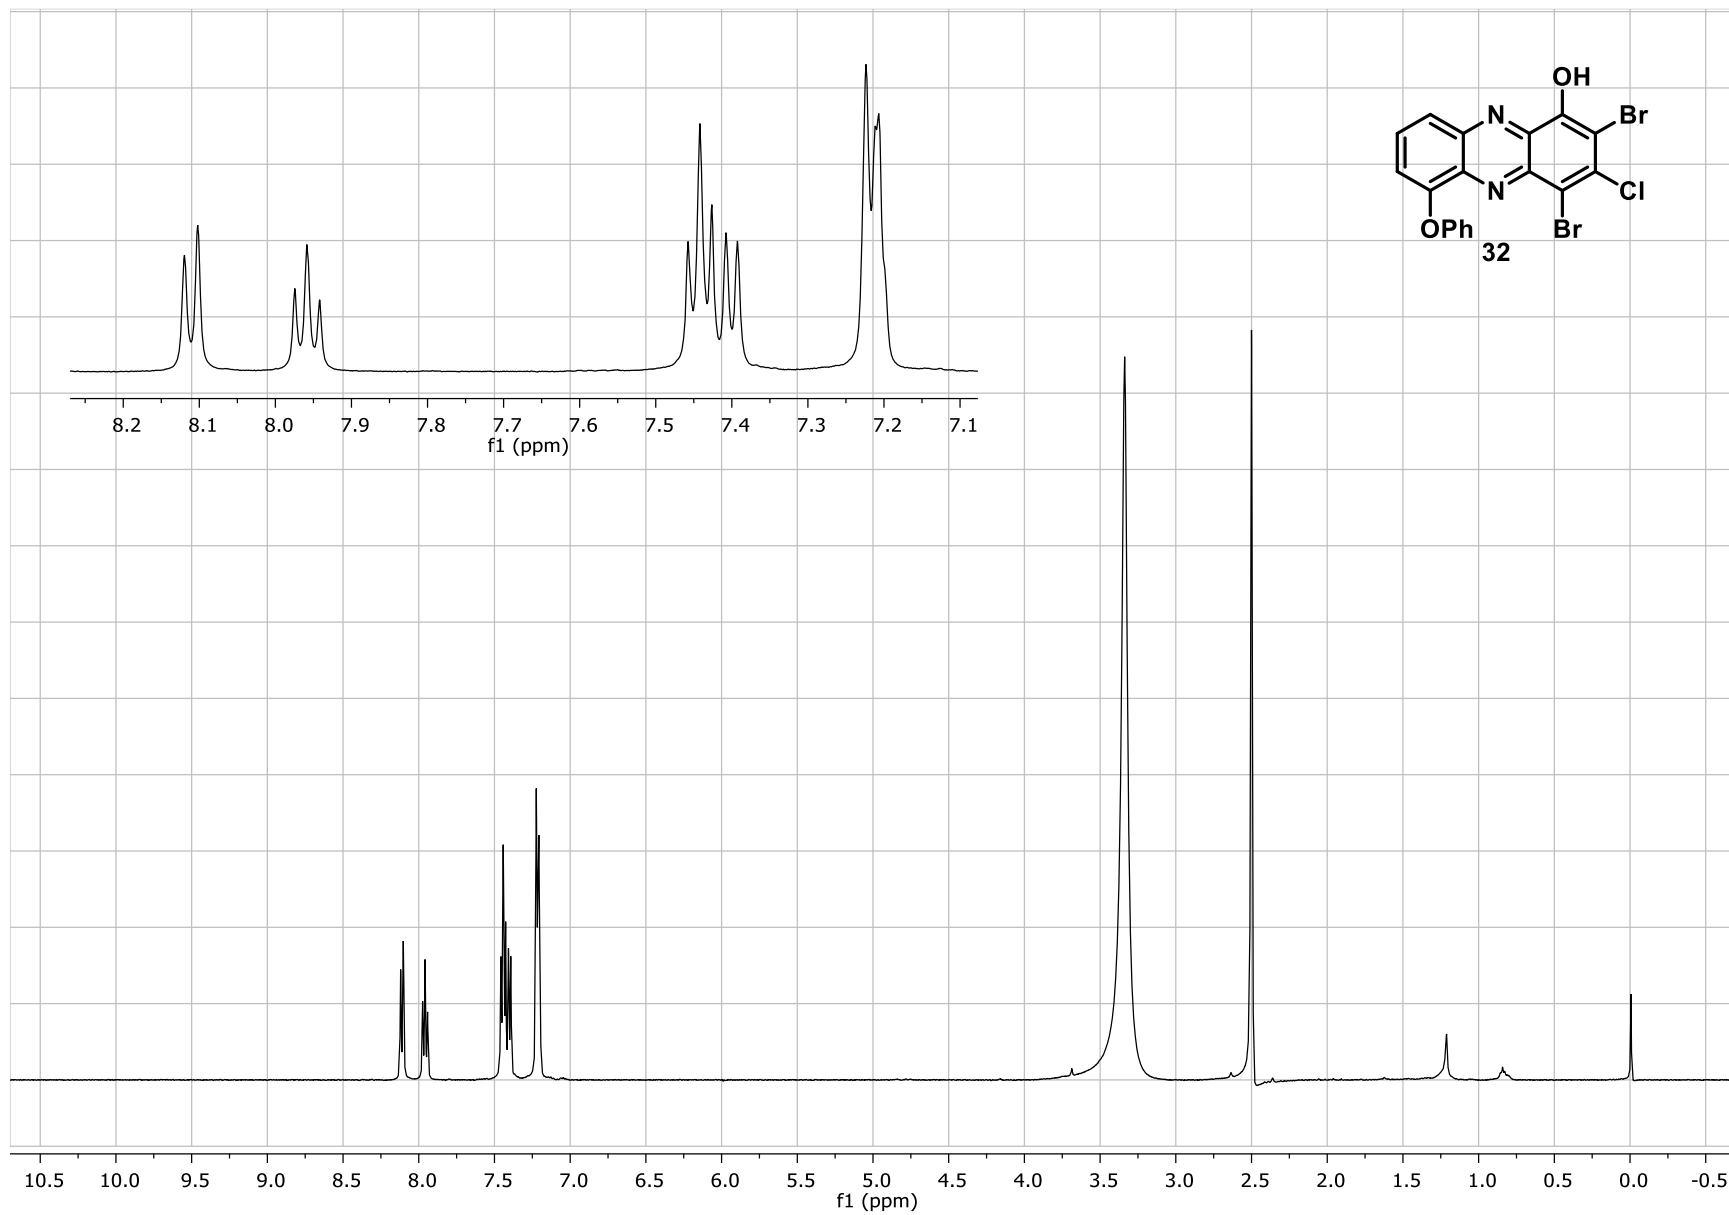



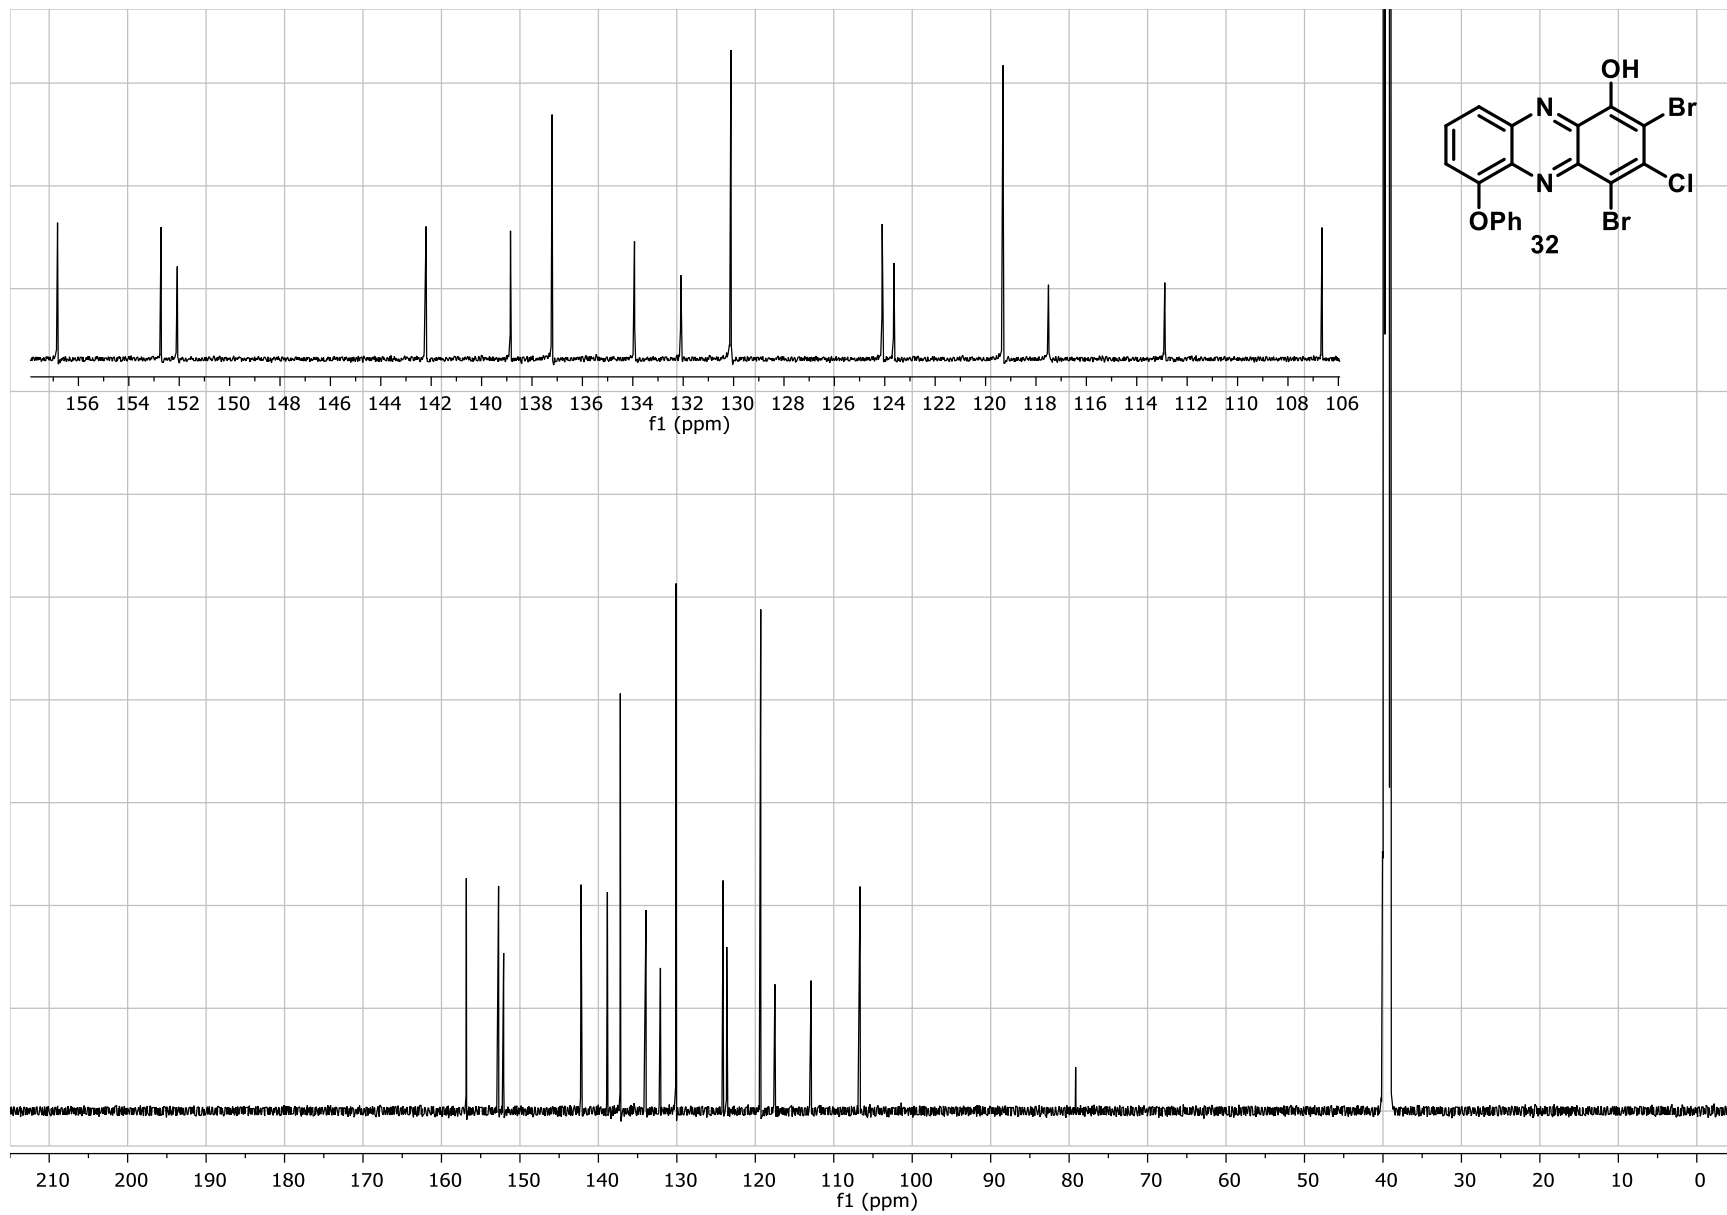

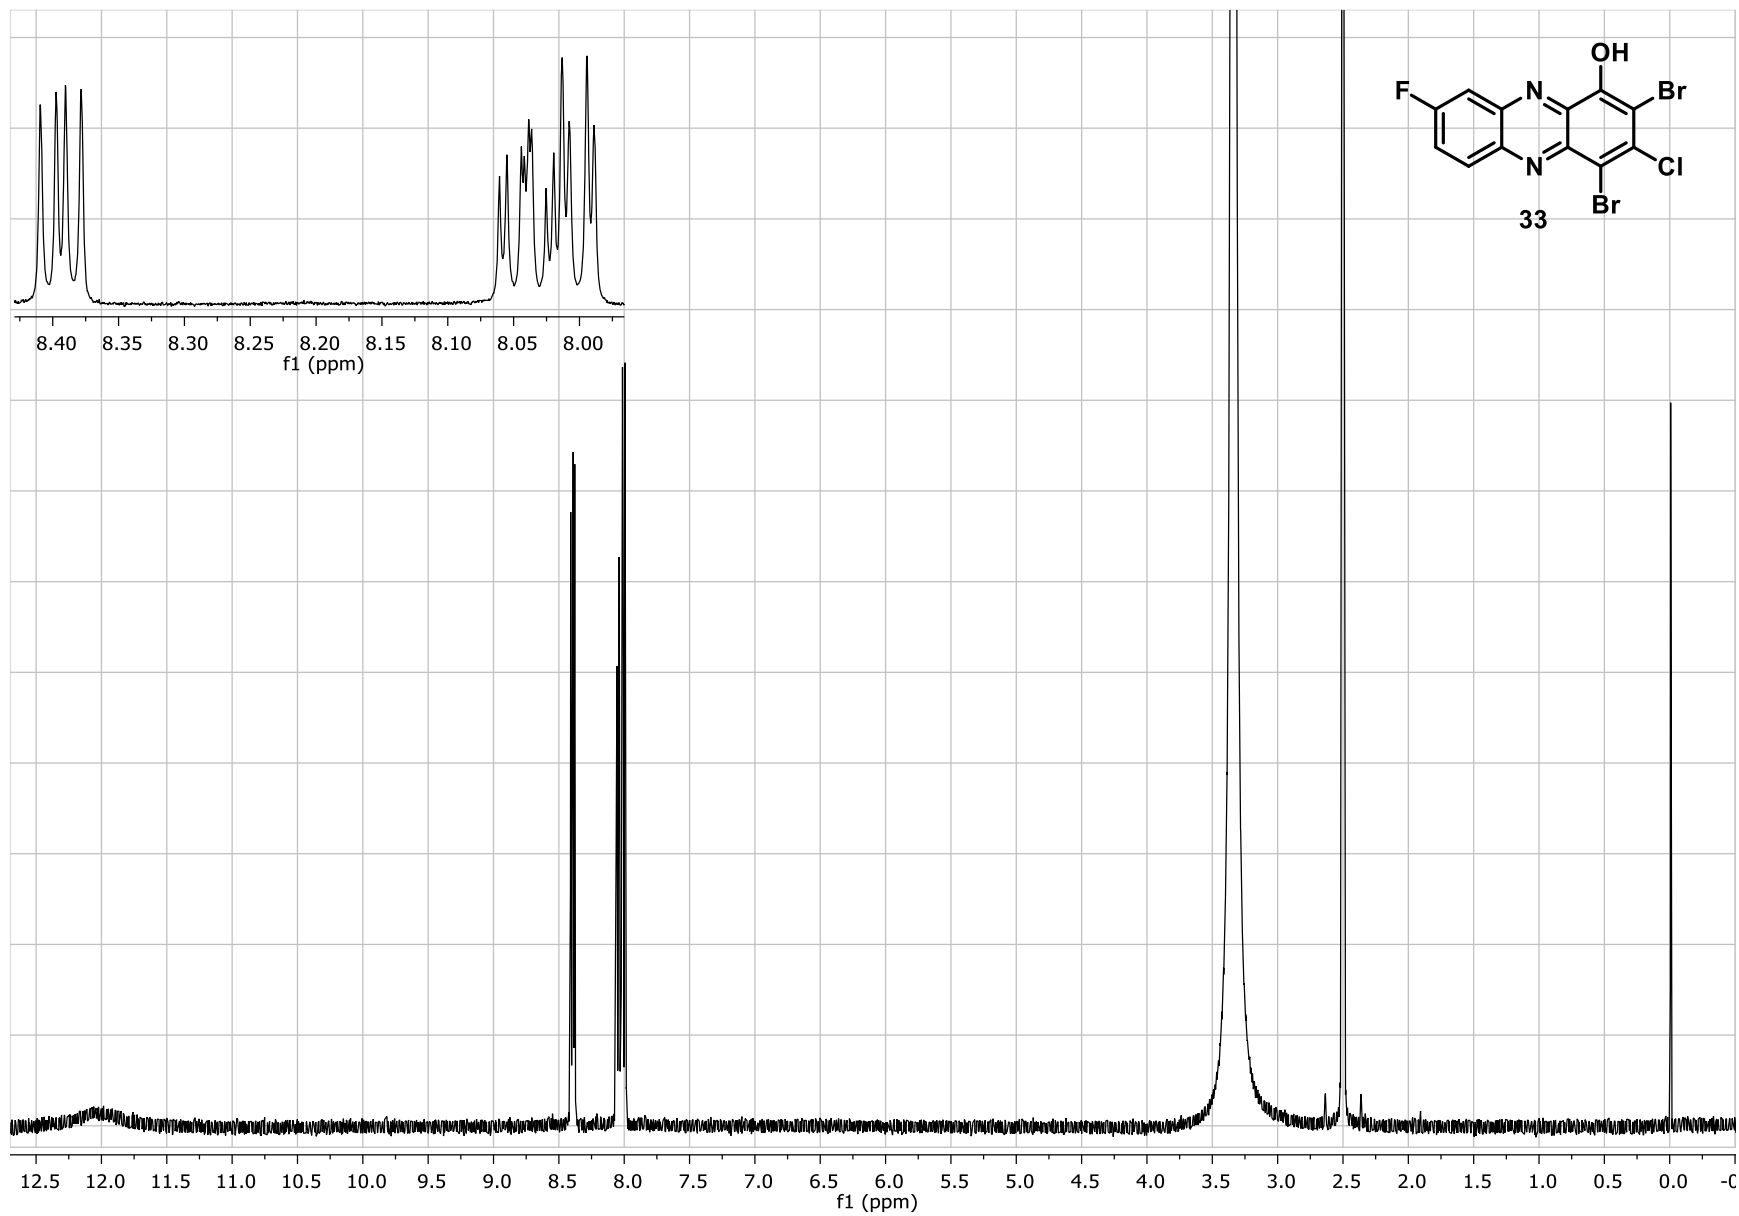

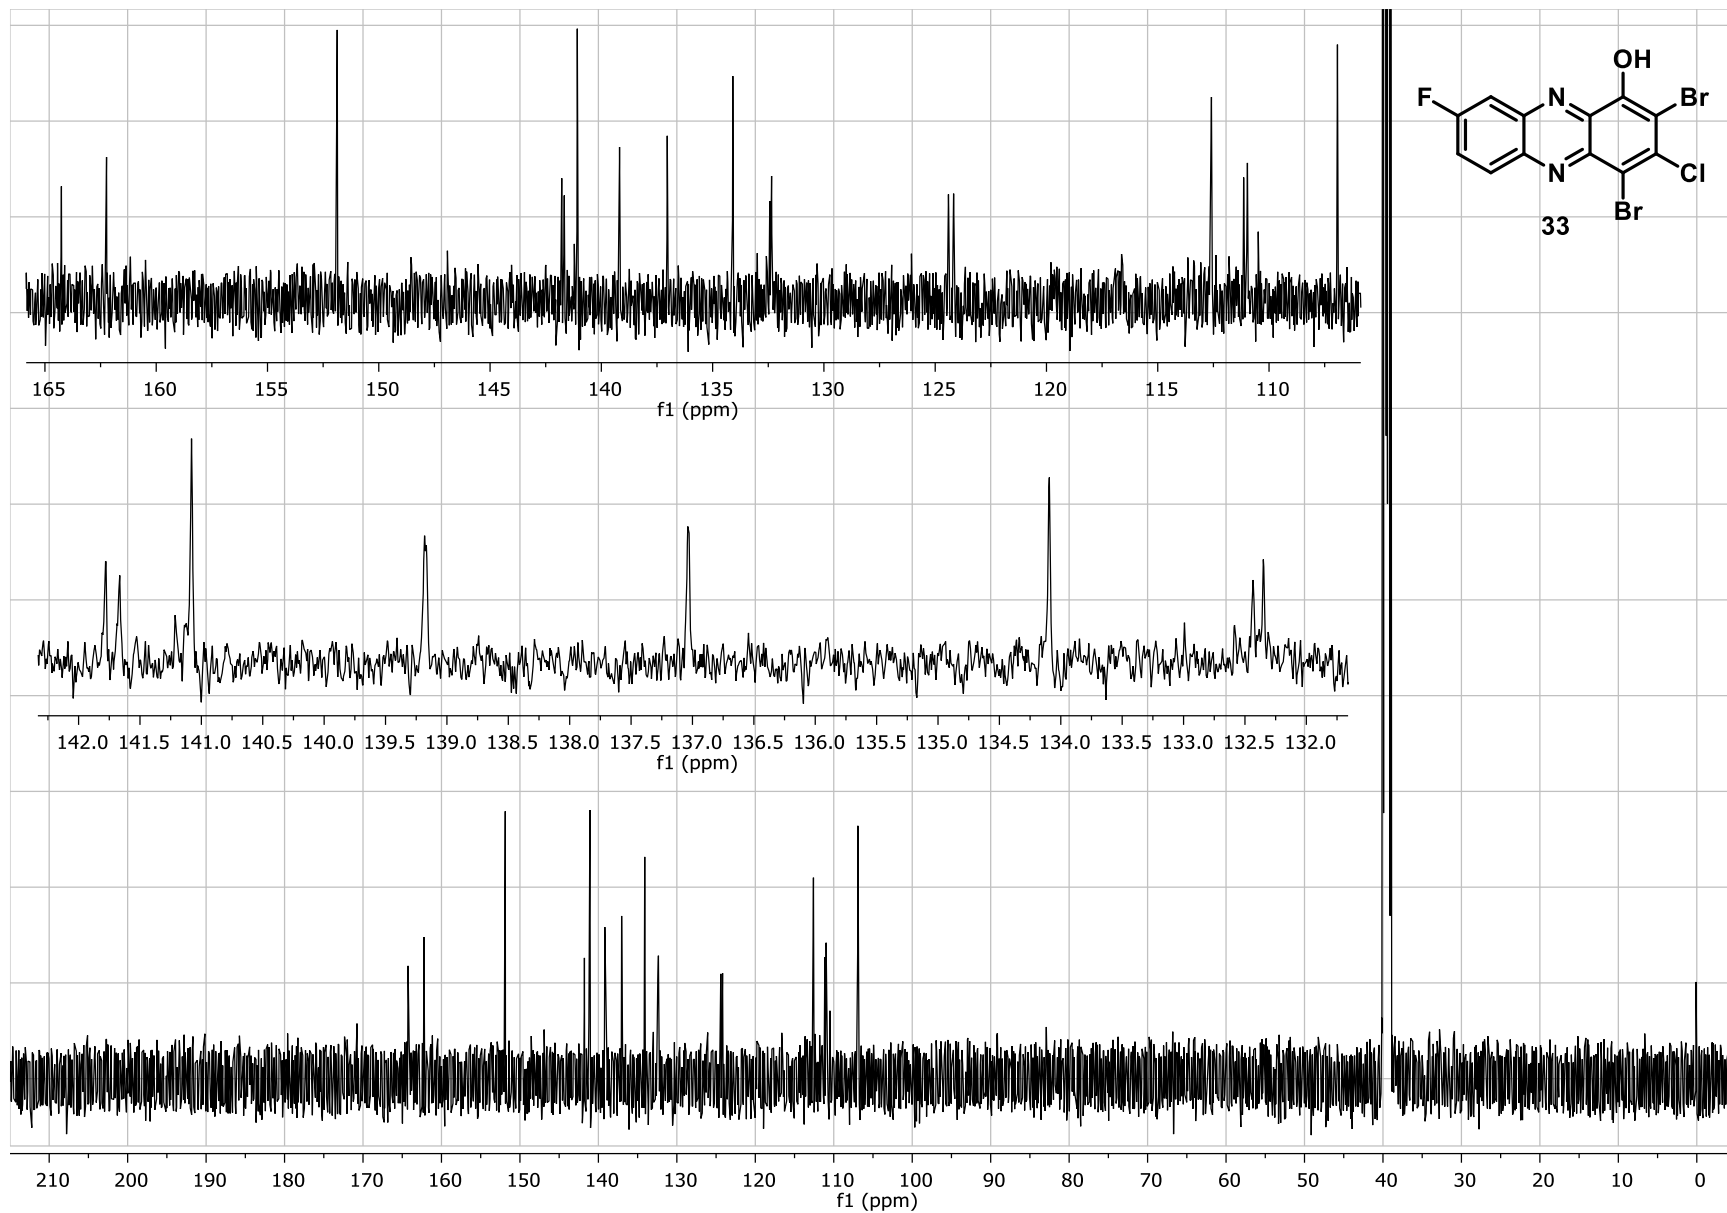

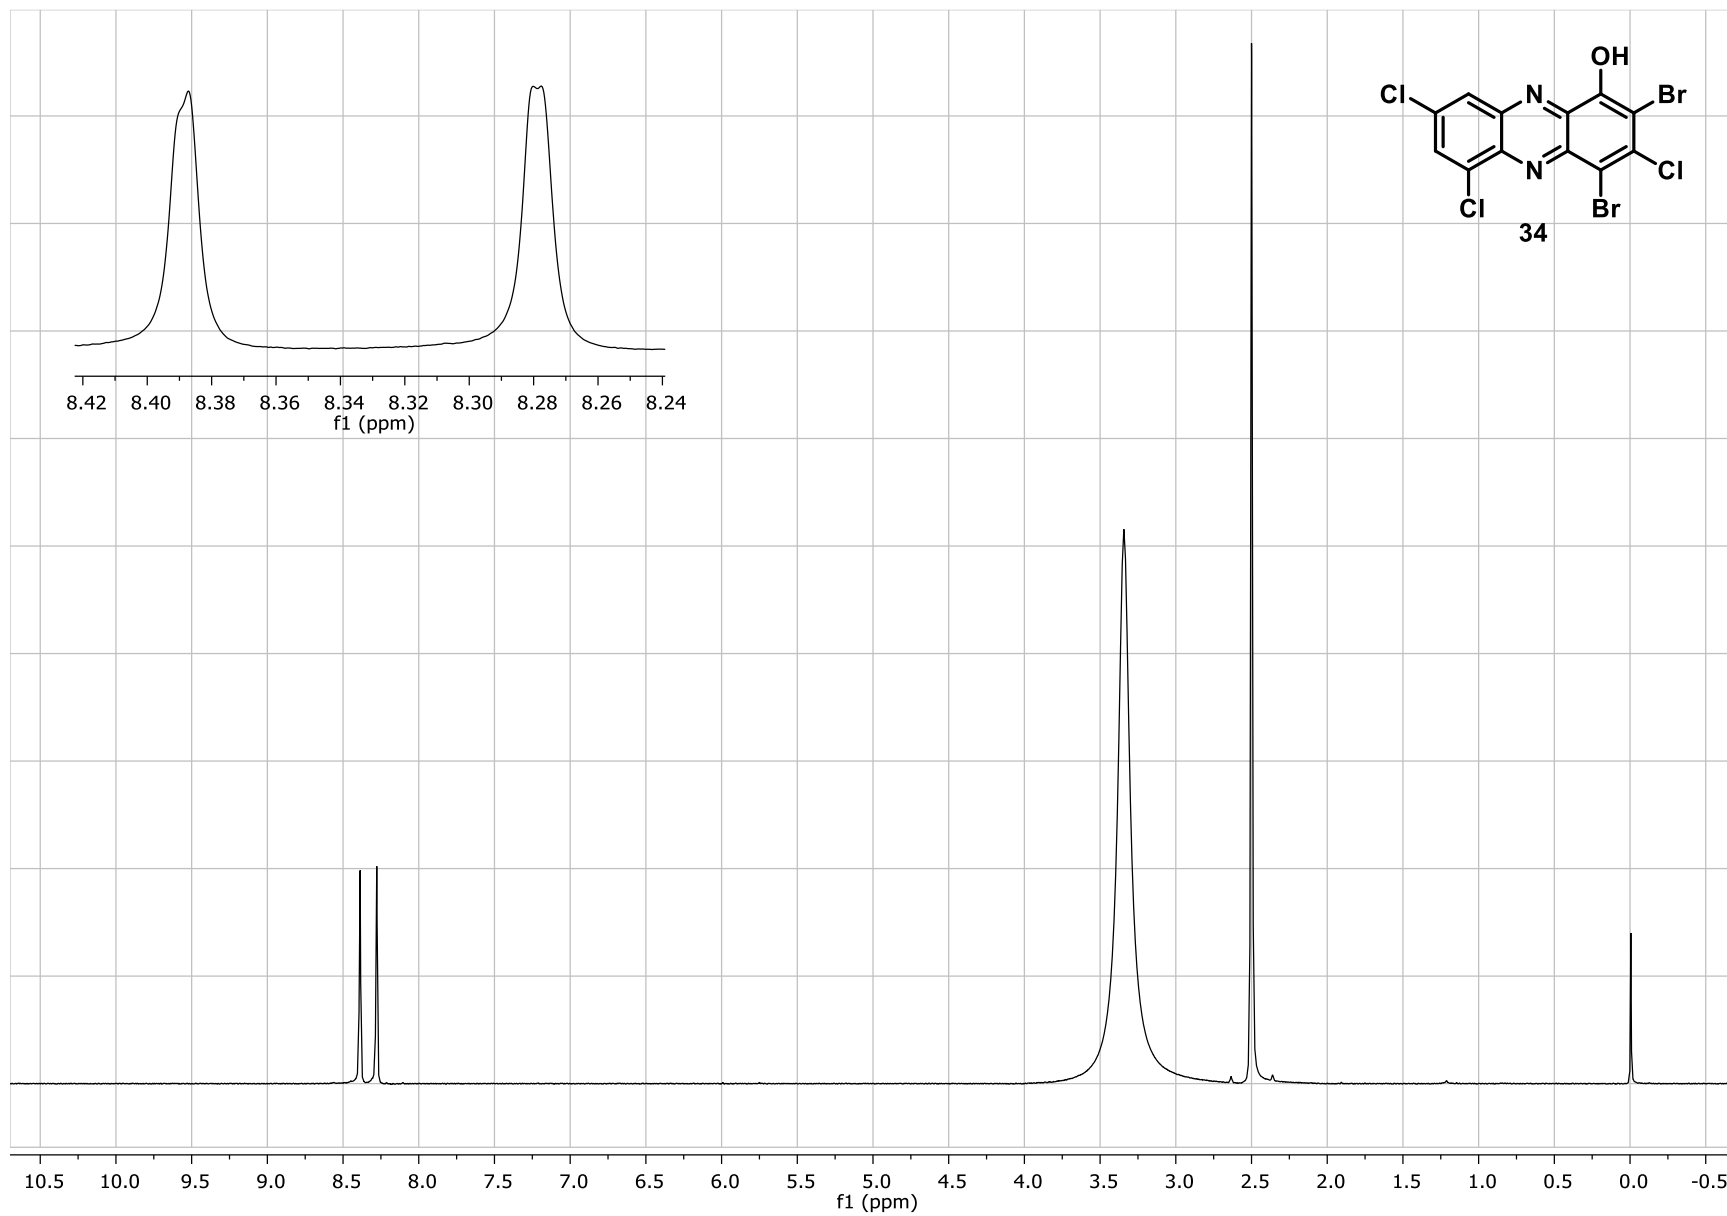

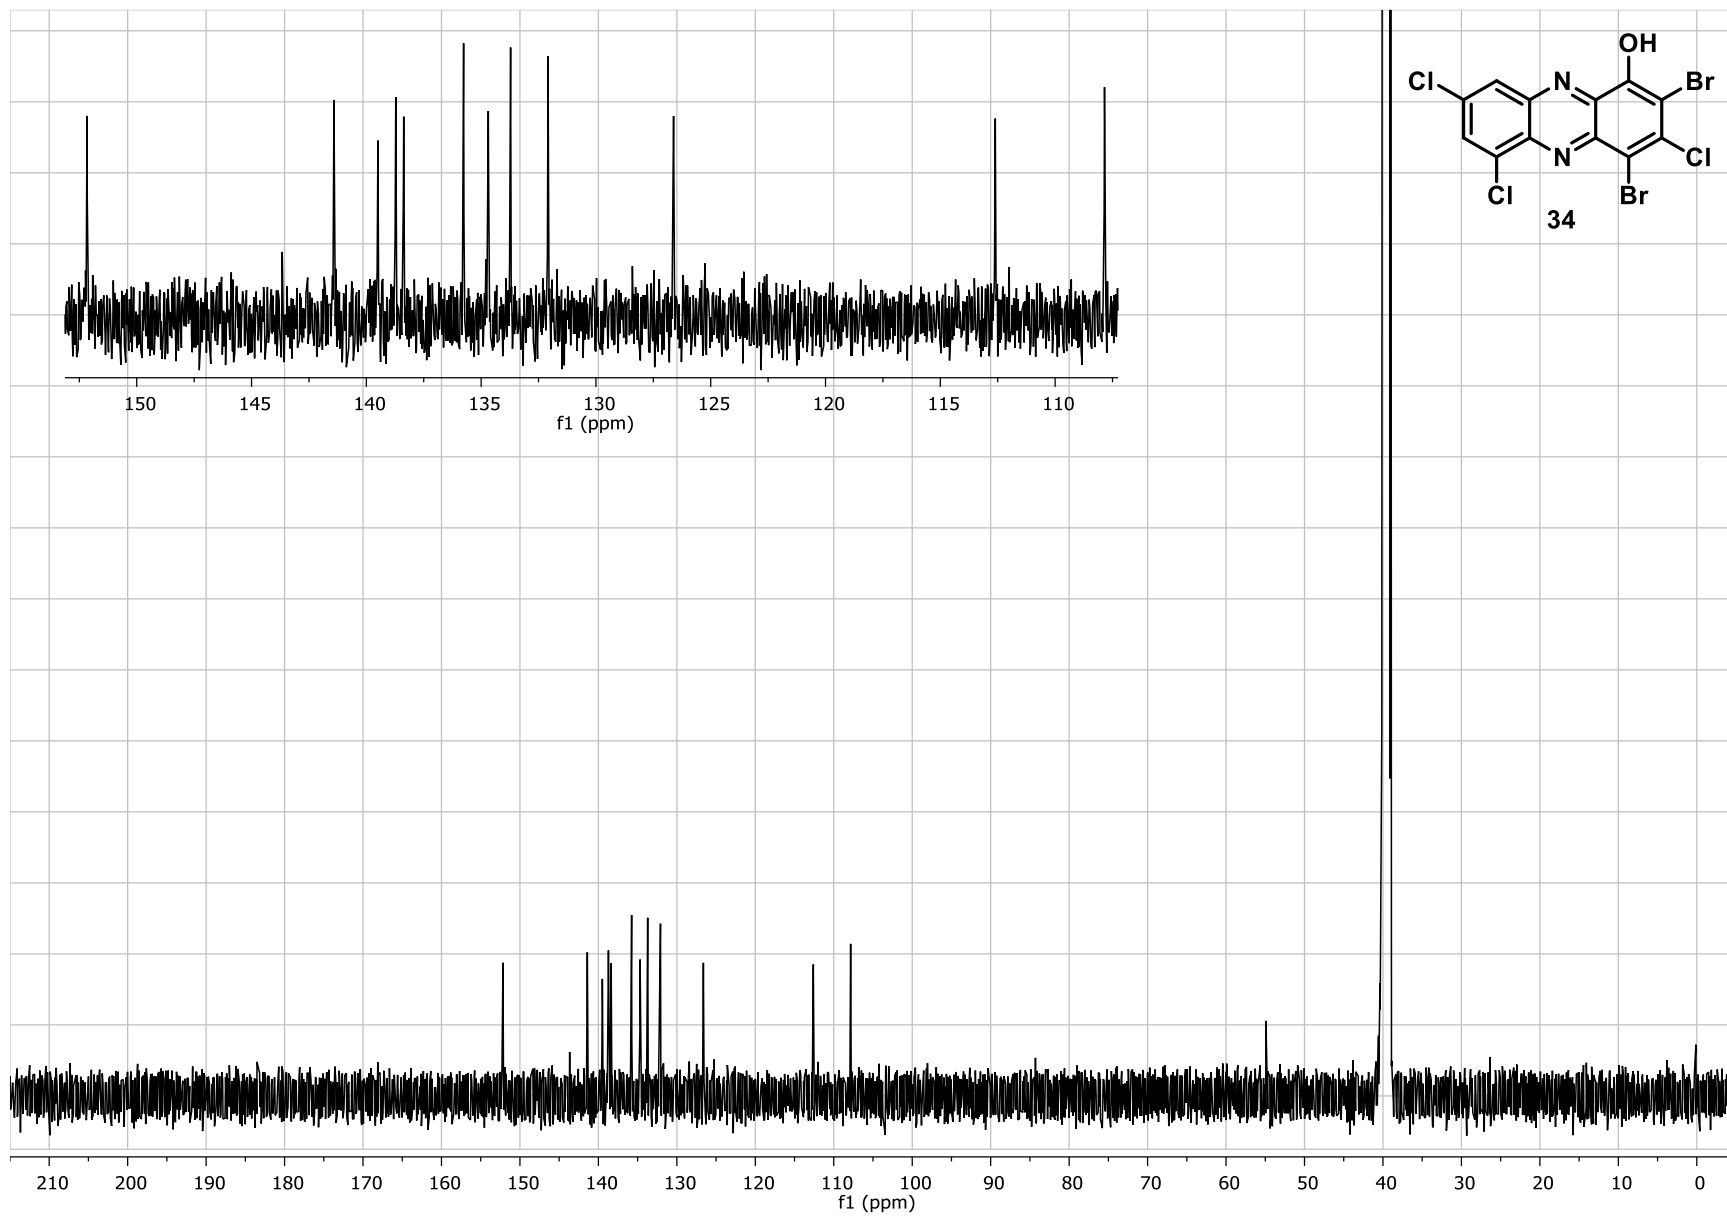

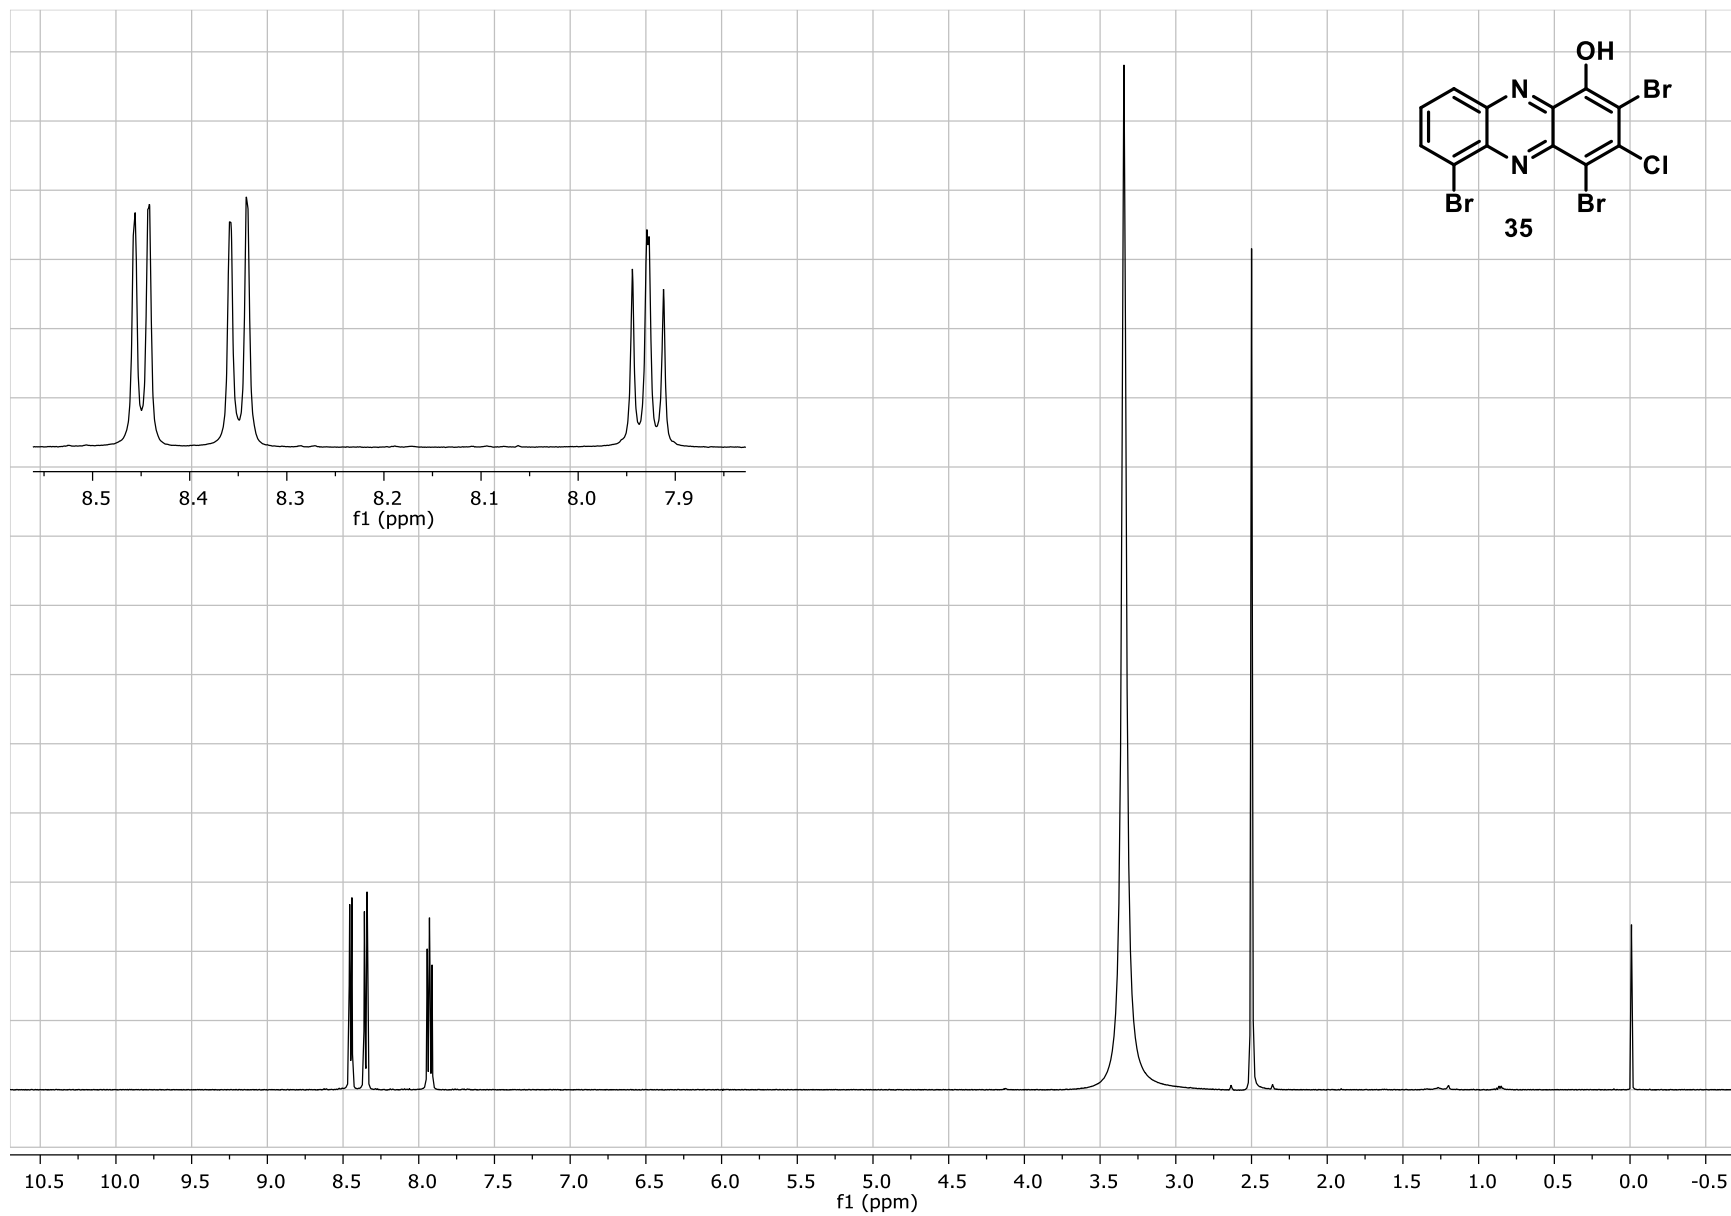

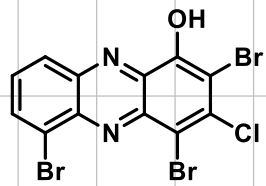

35

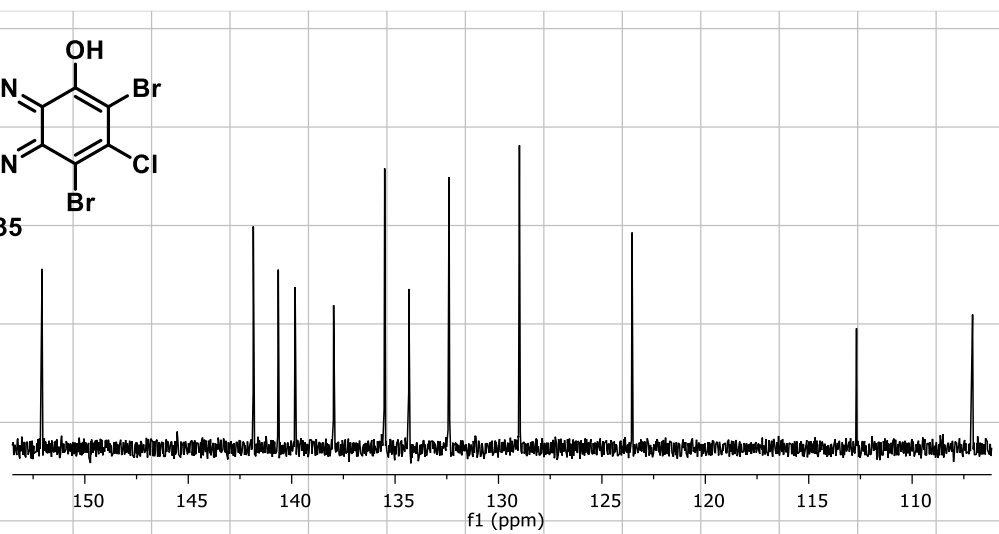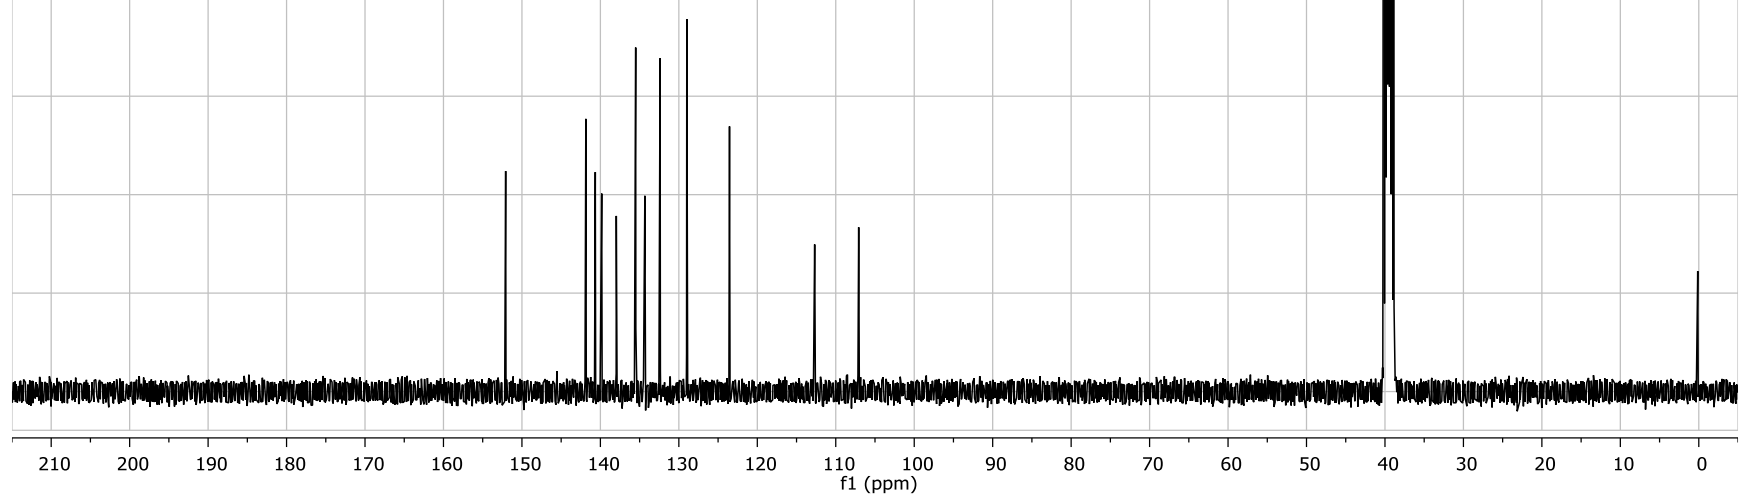

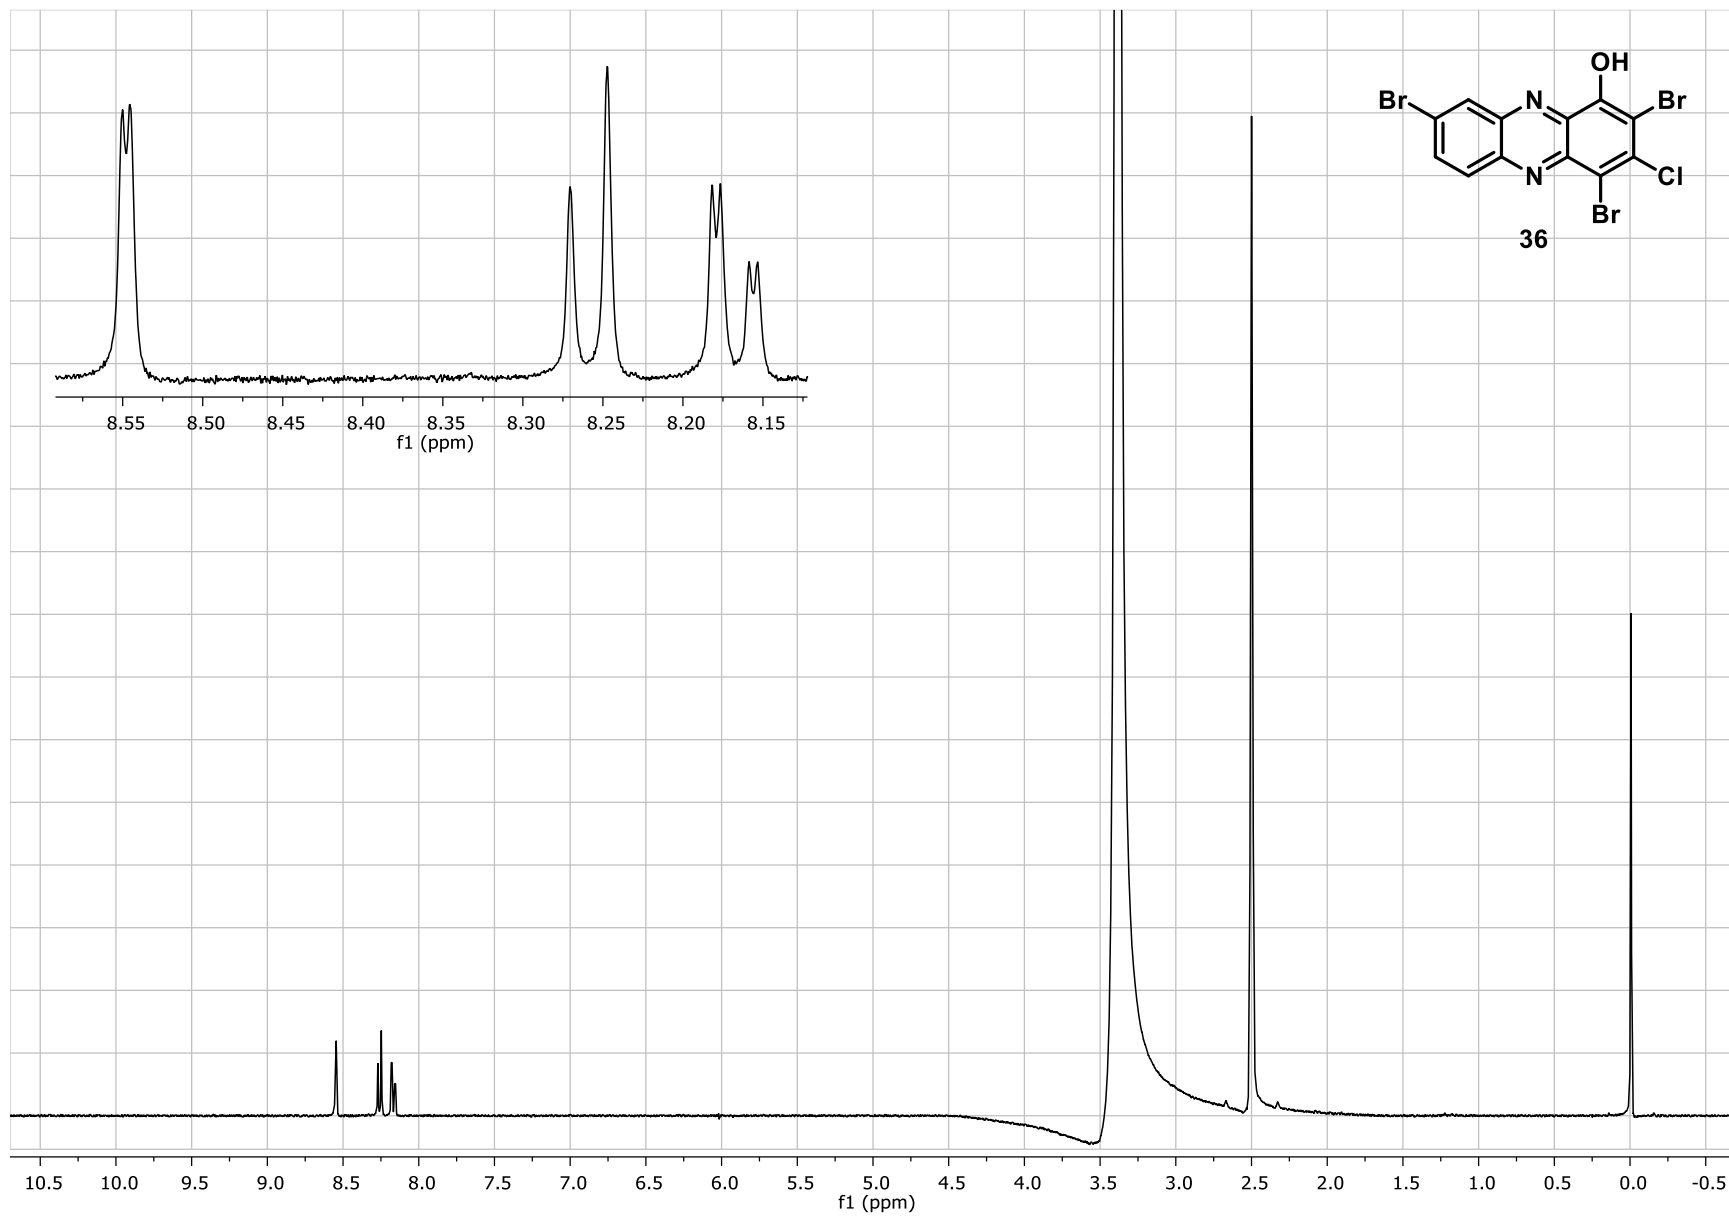



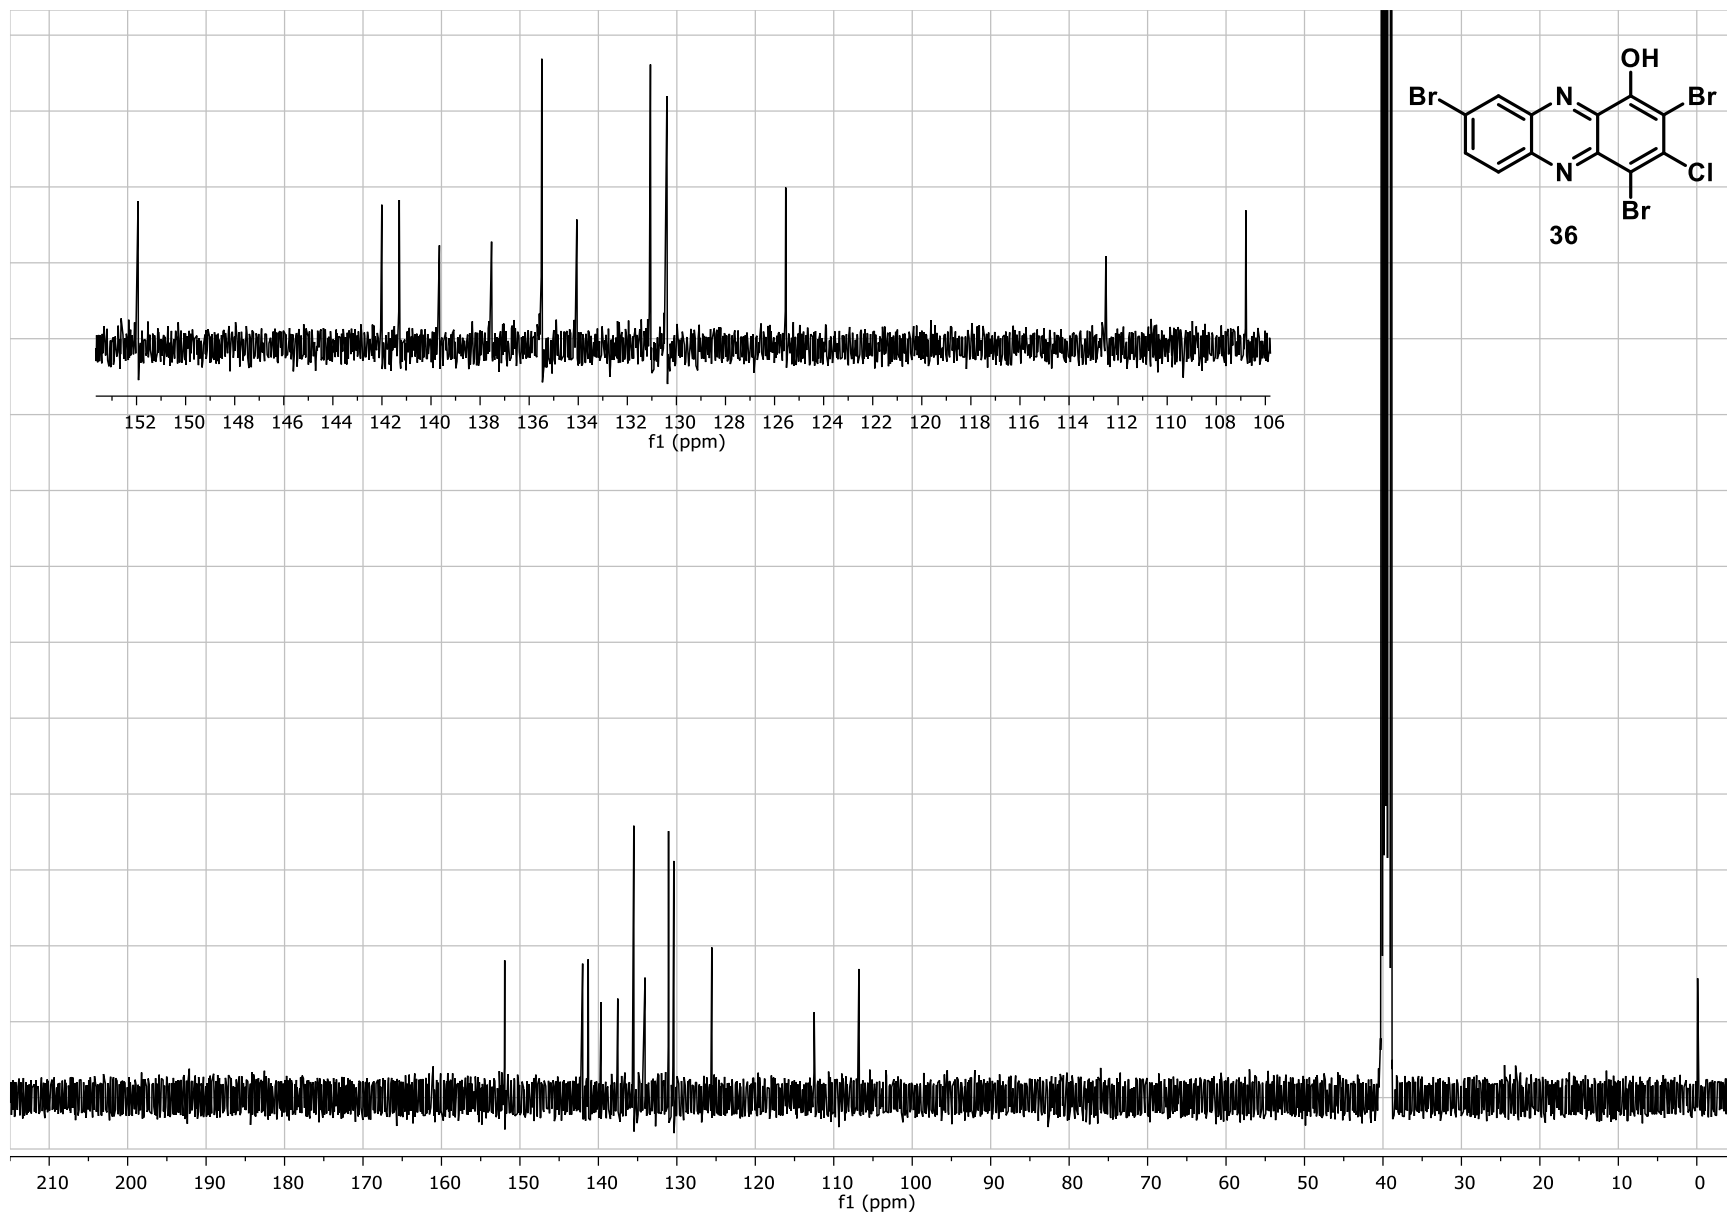

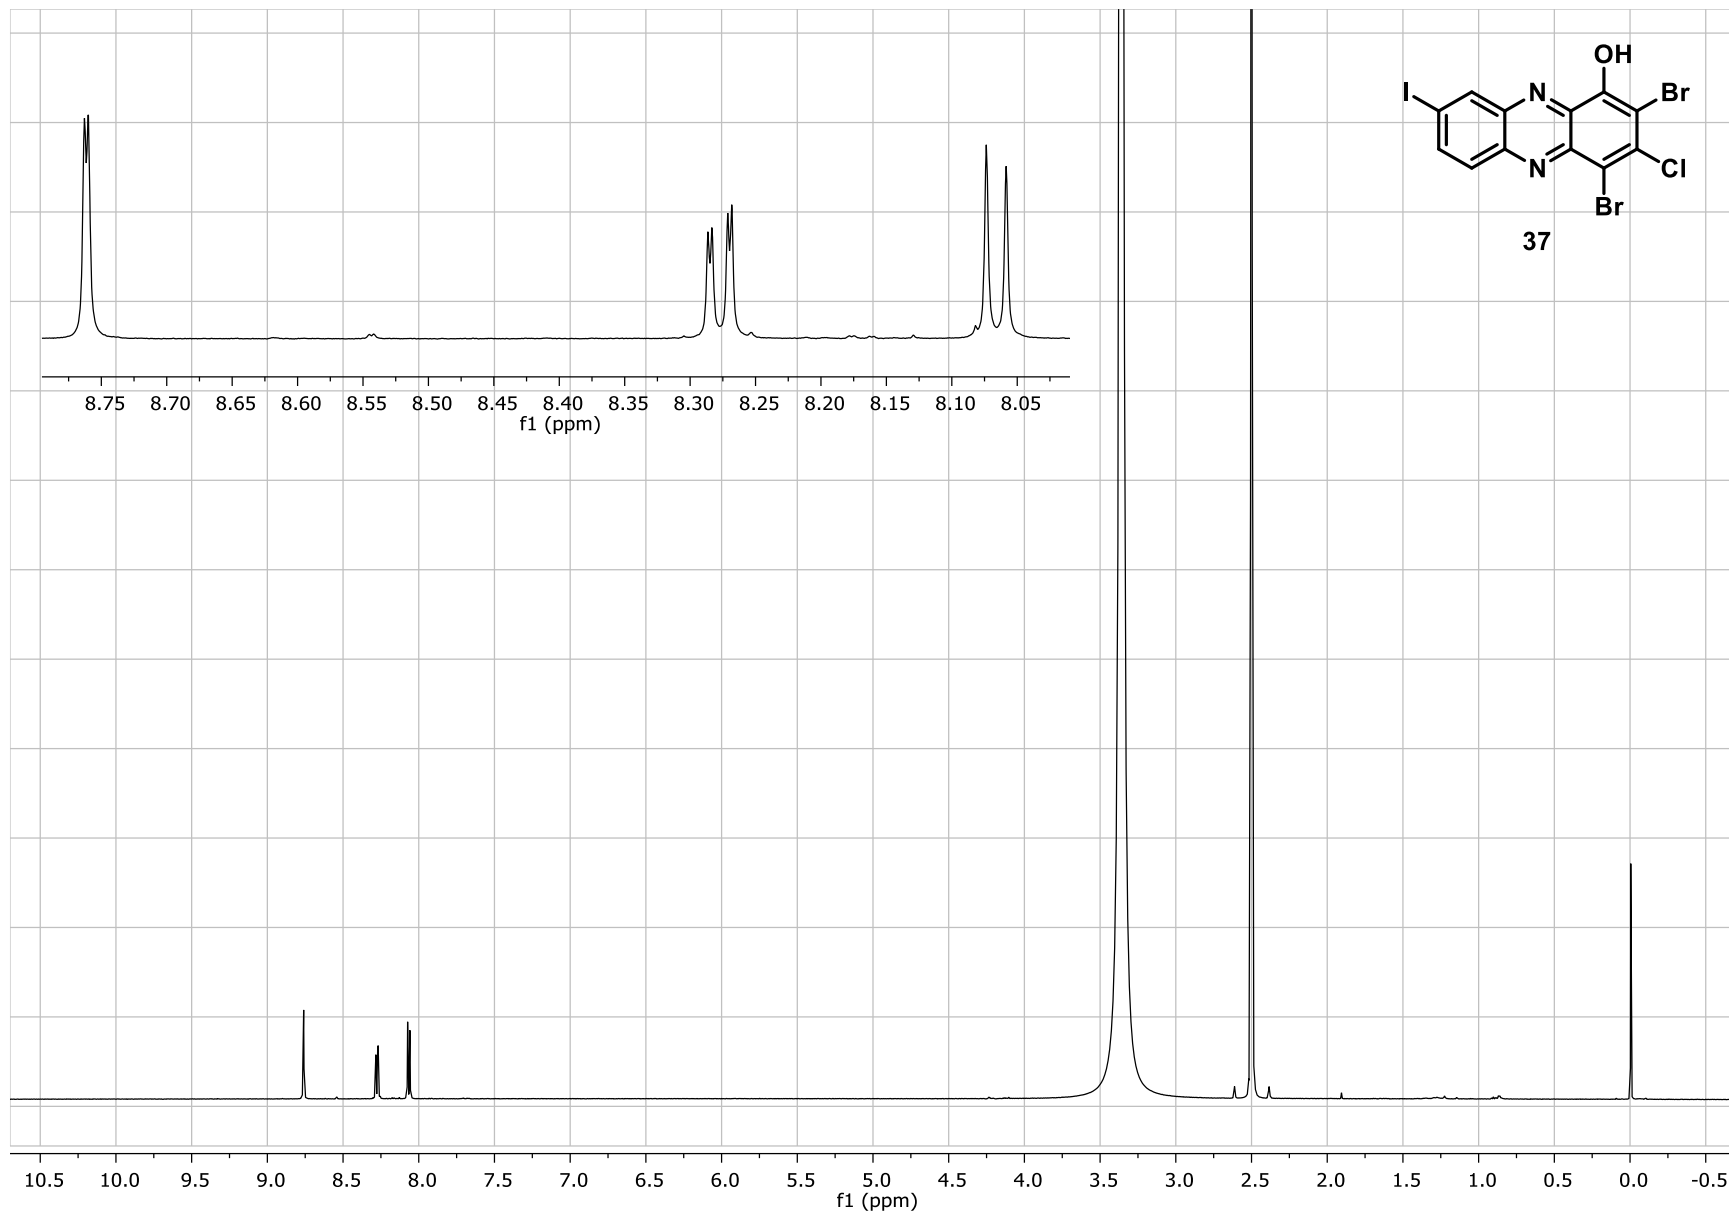

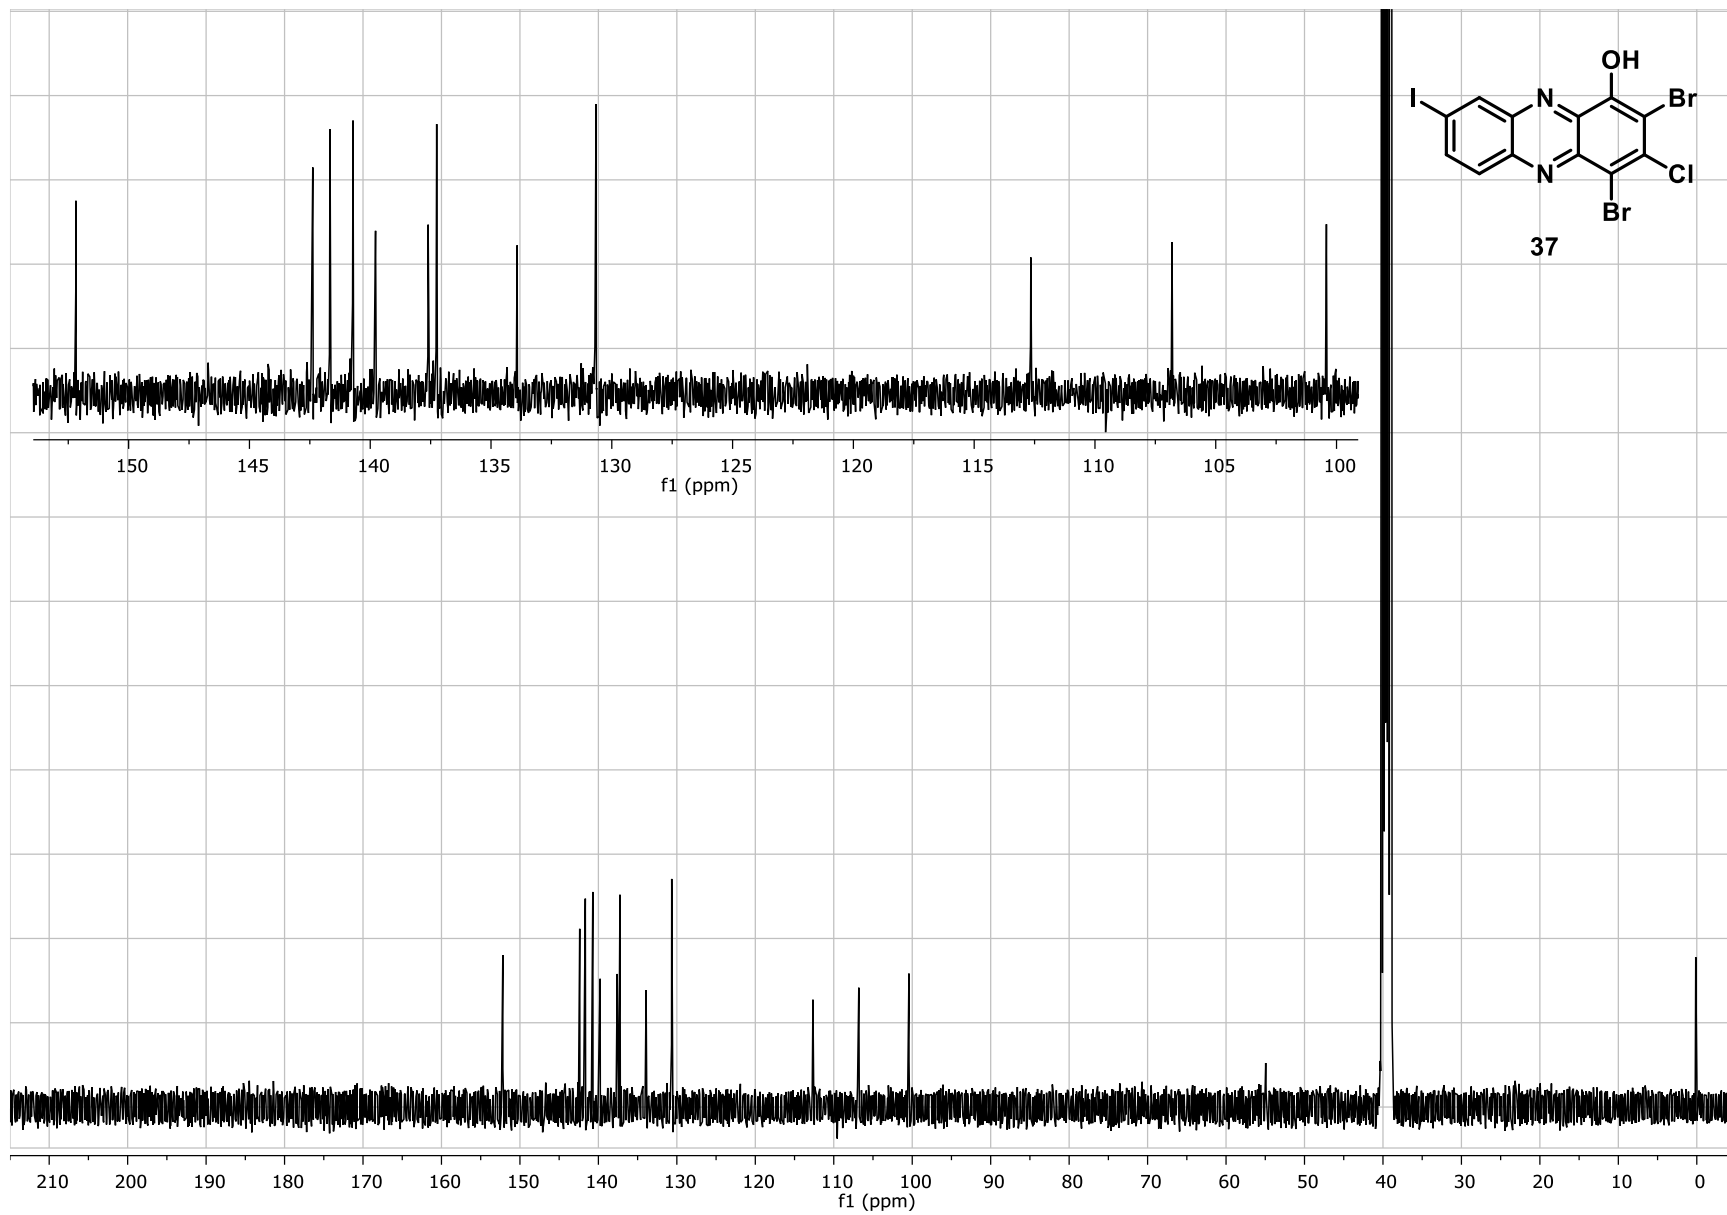

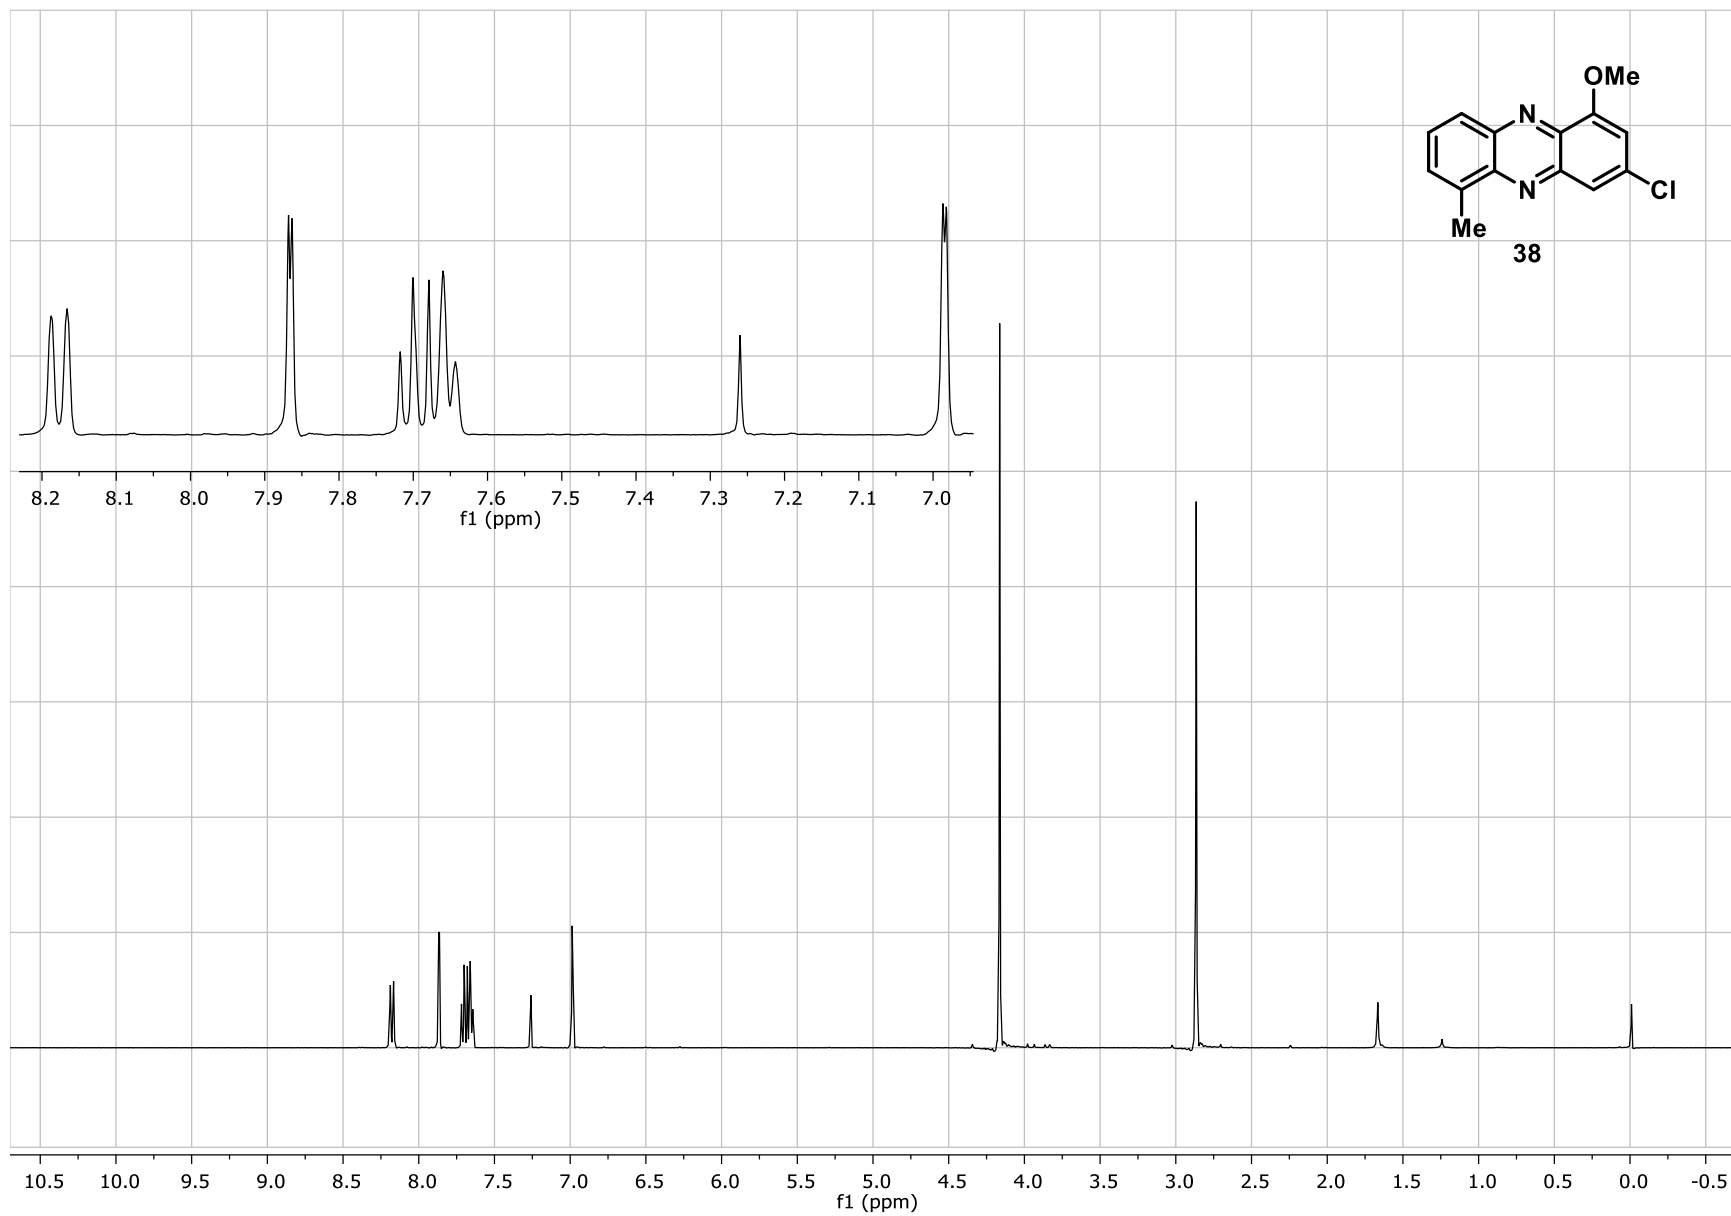

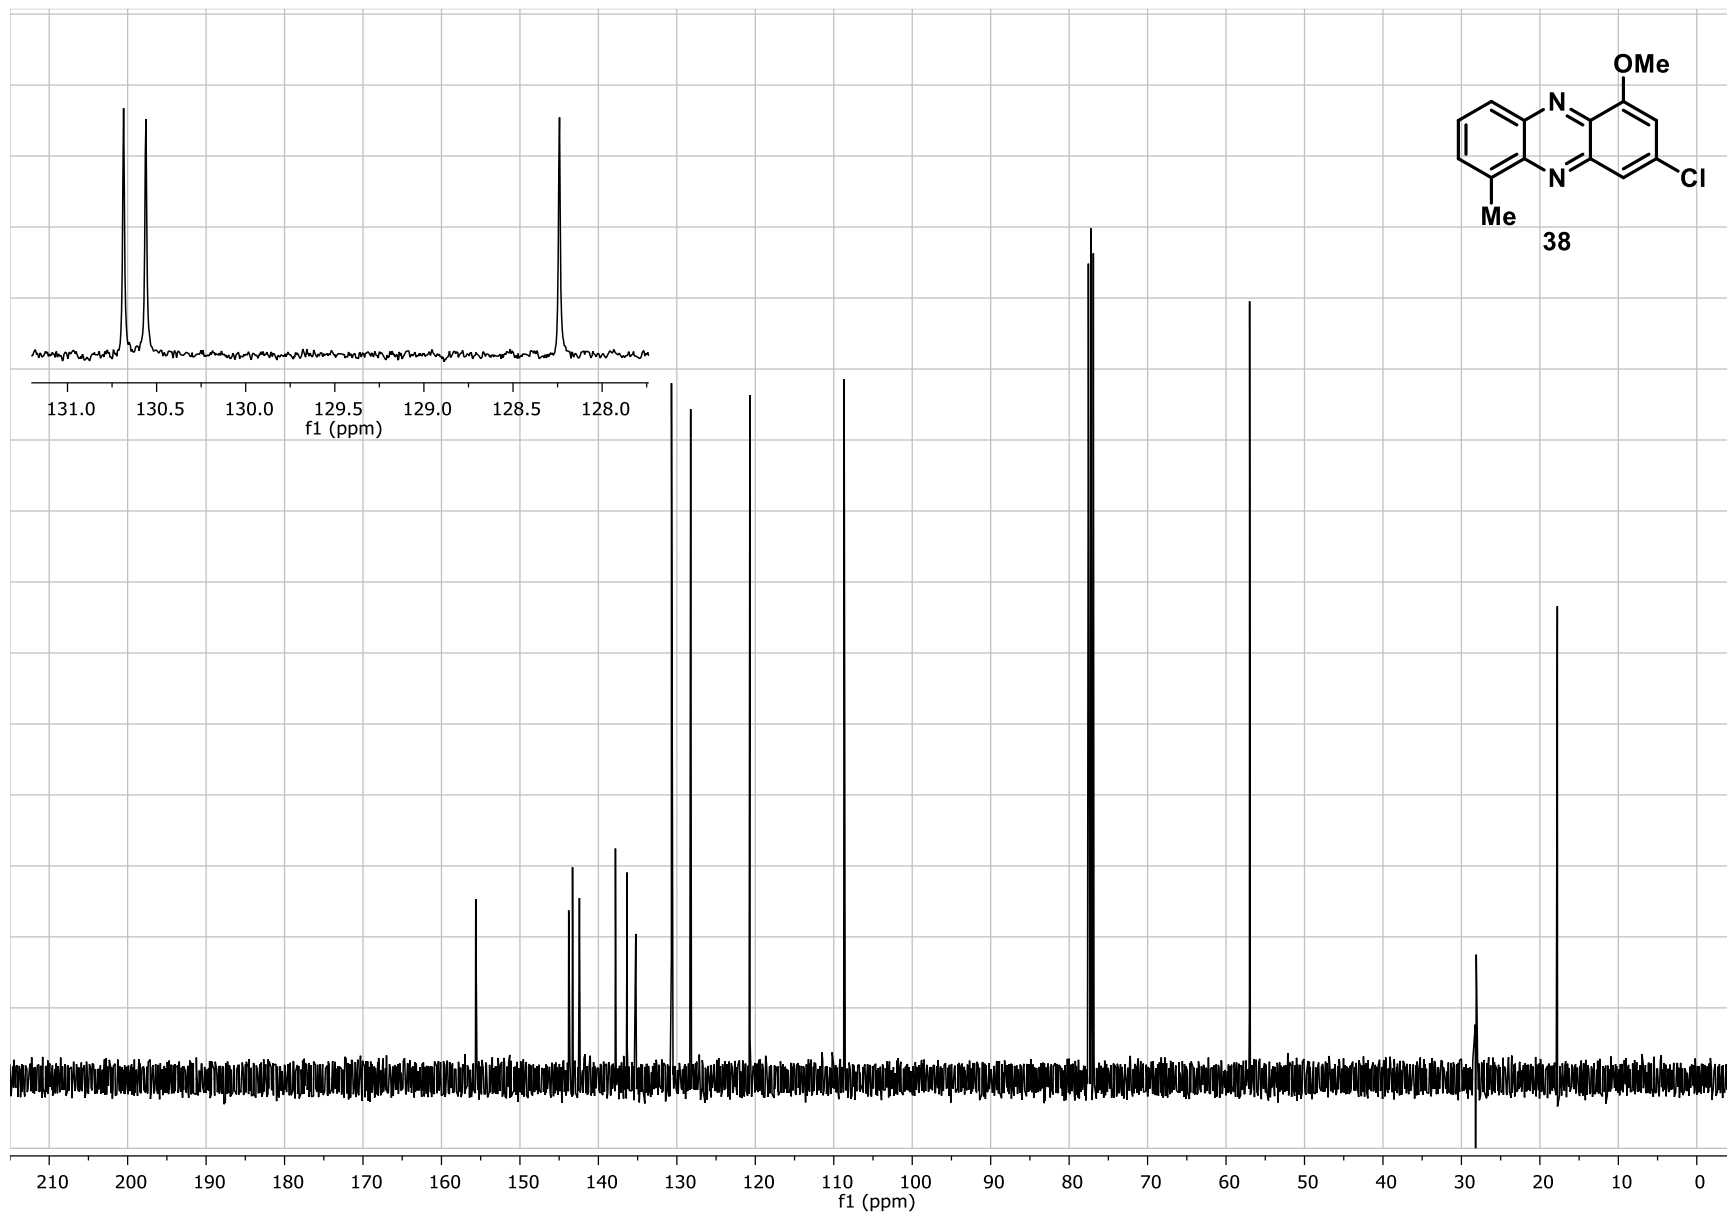

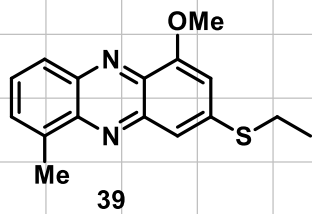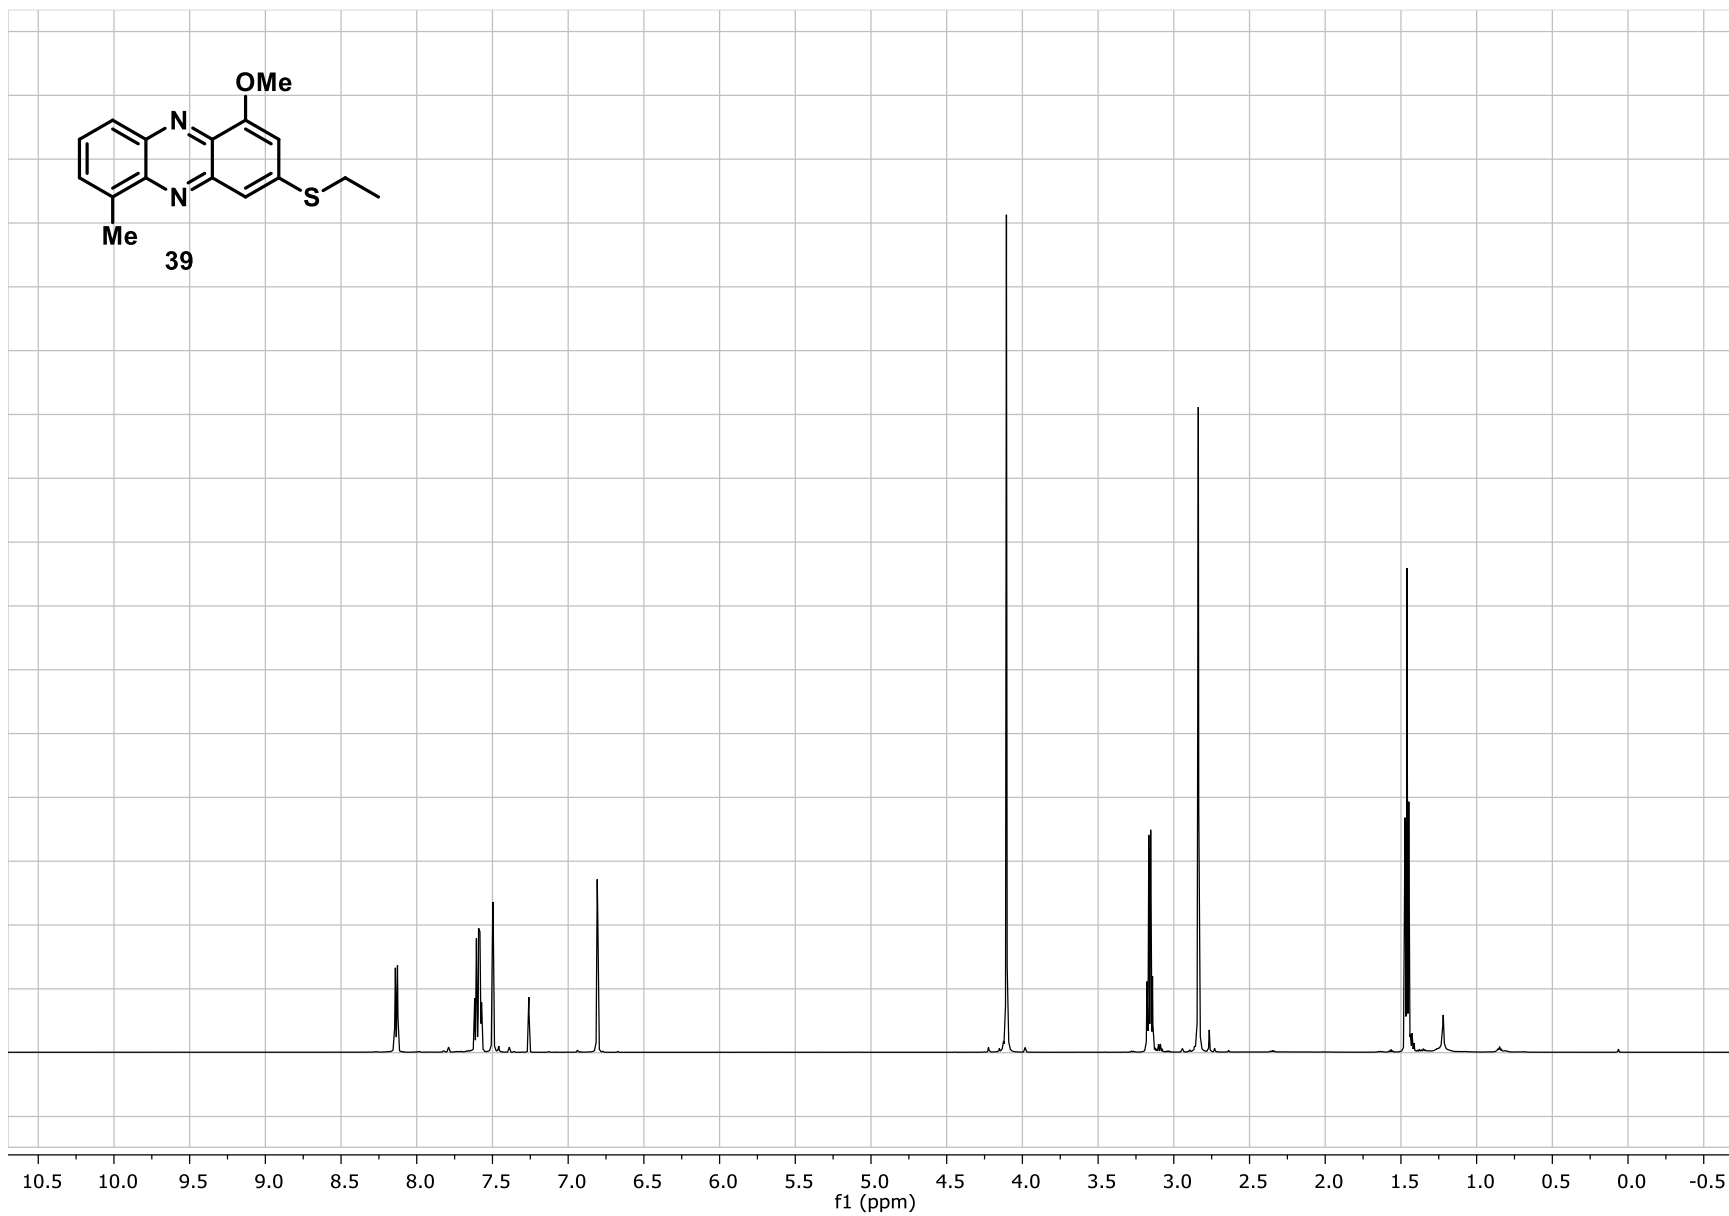

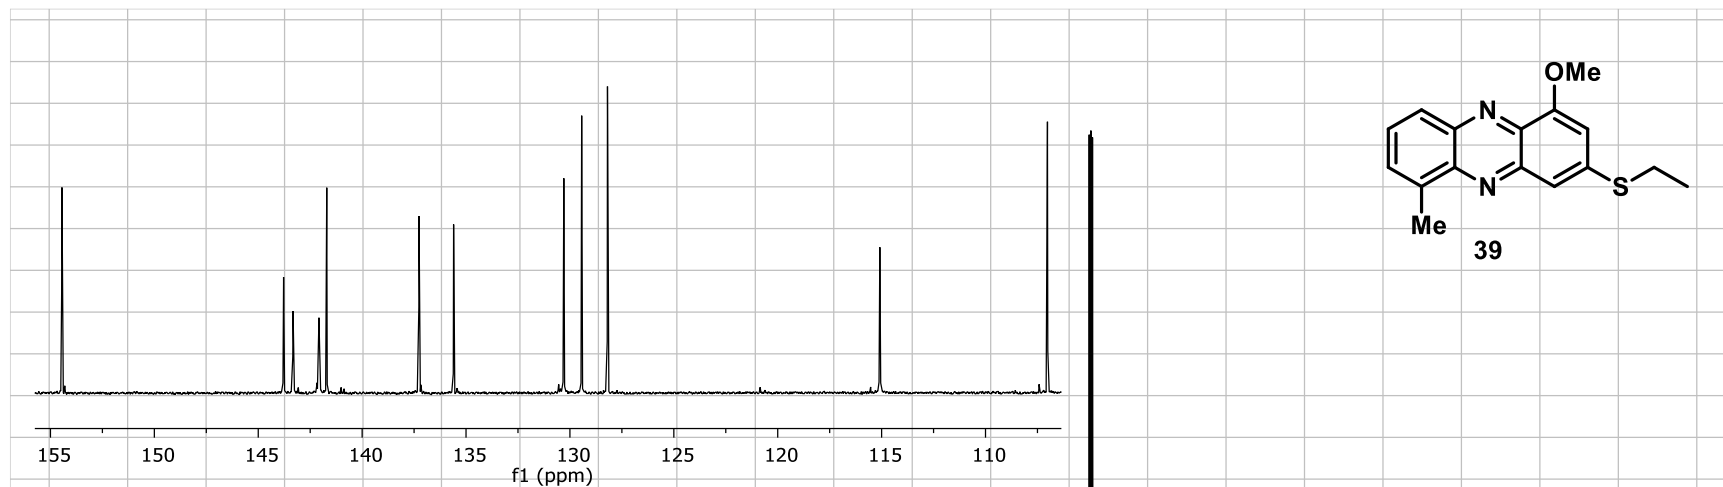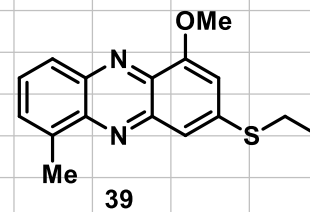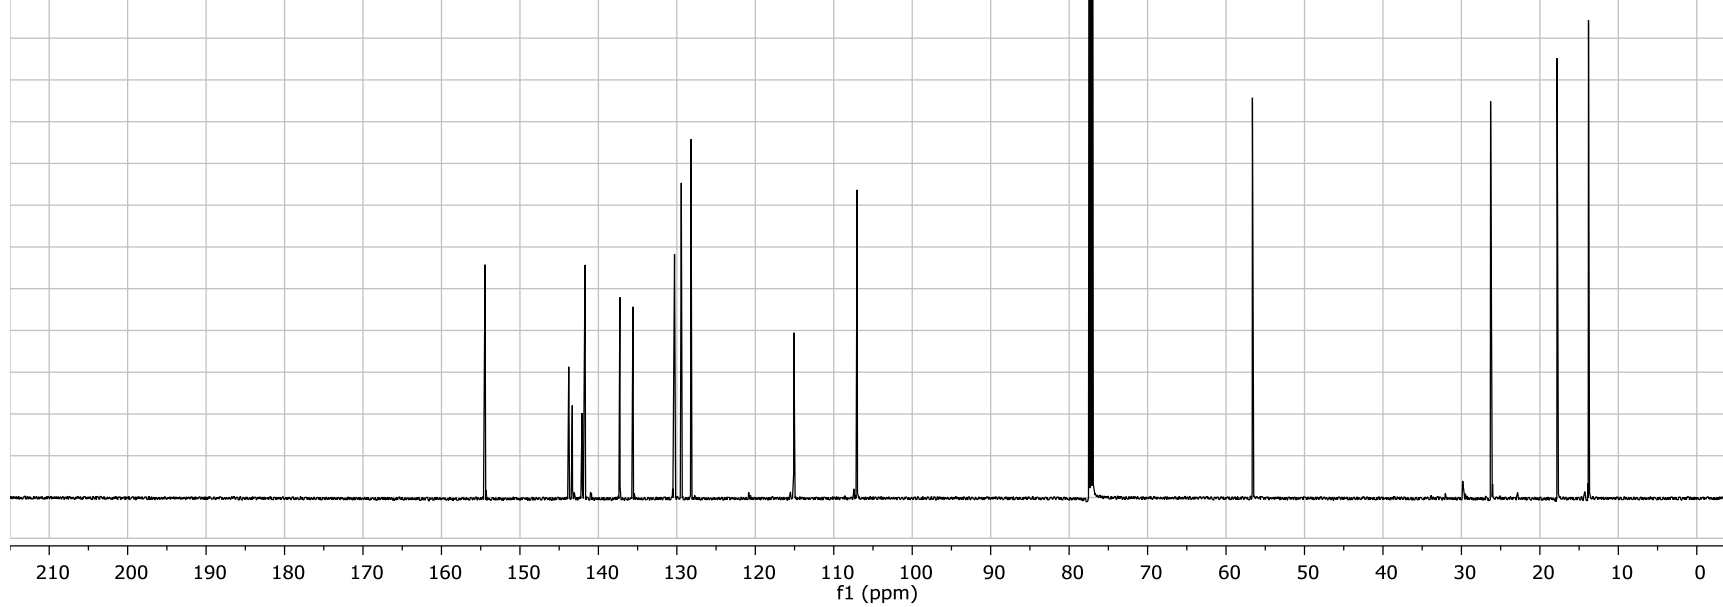

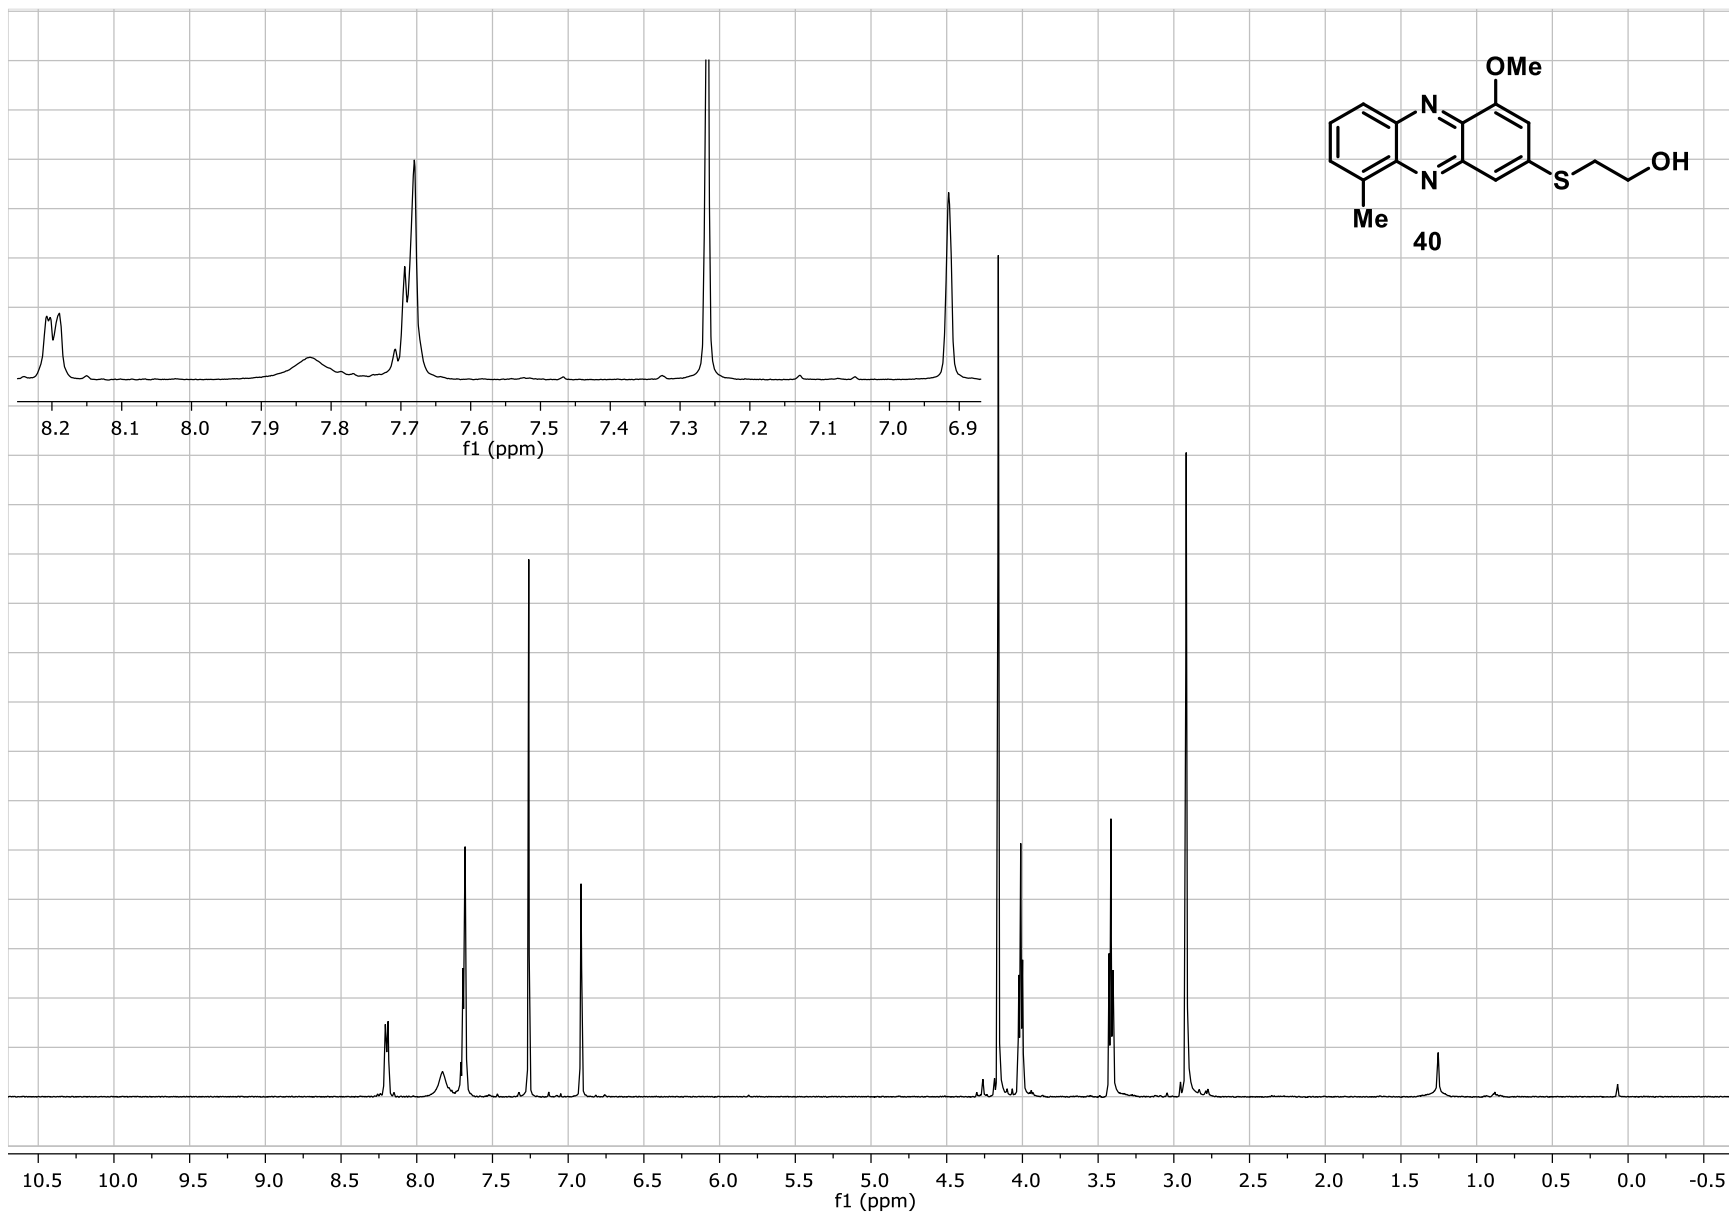



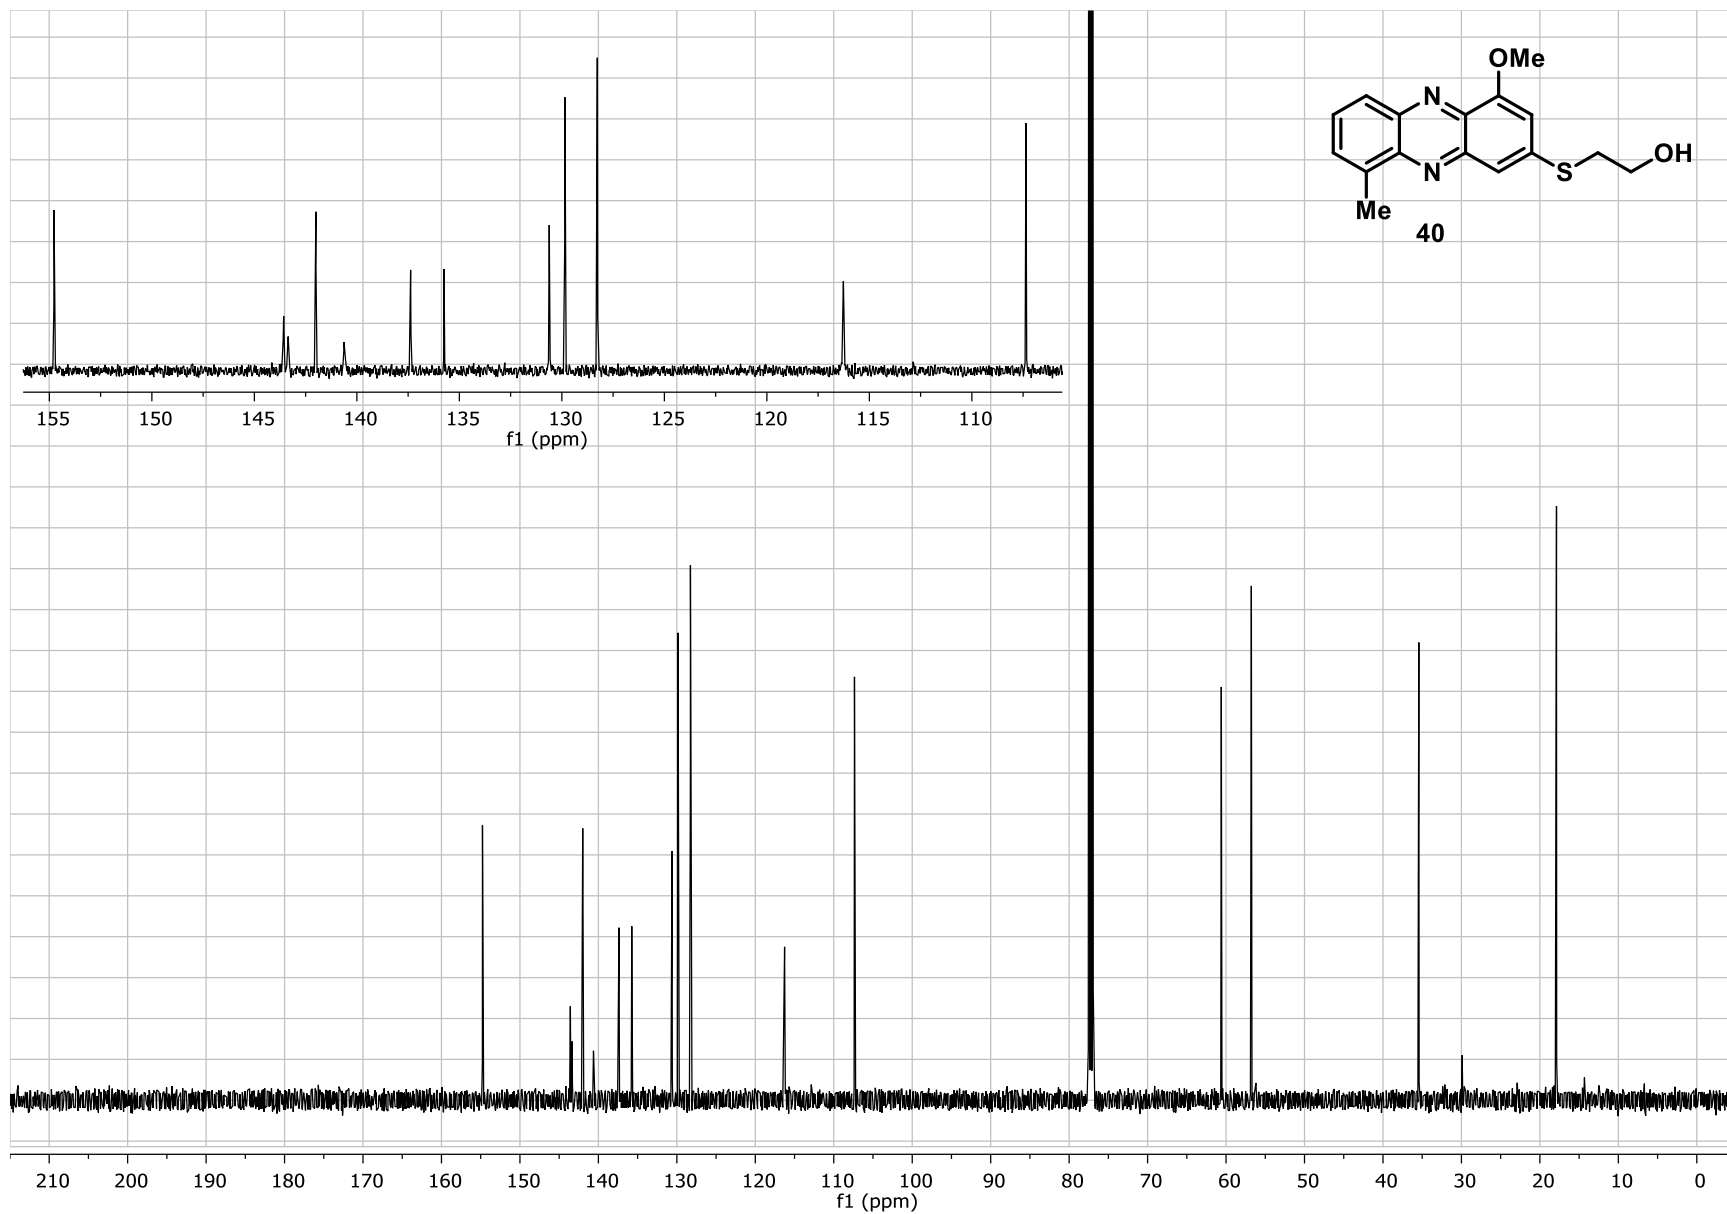

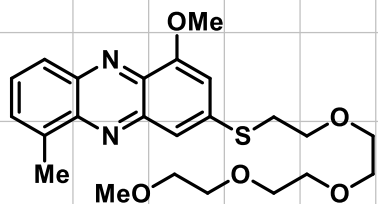

41

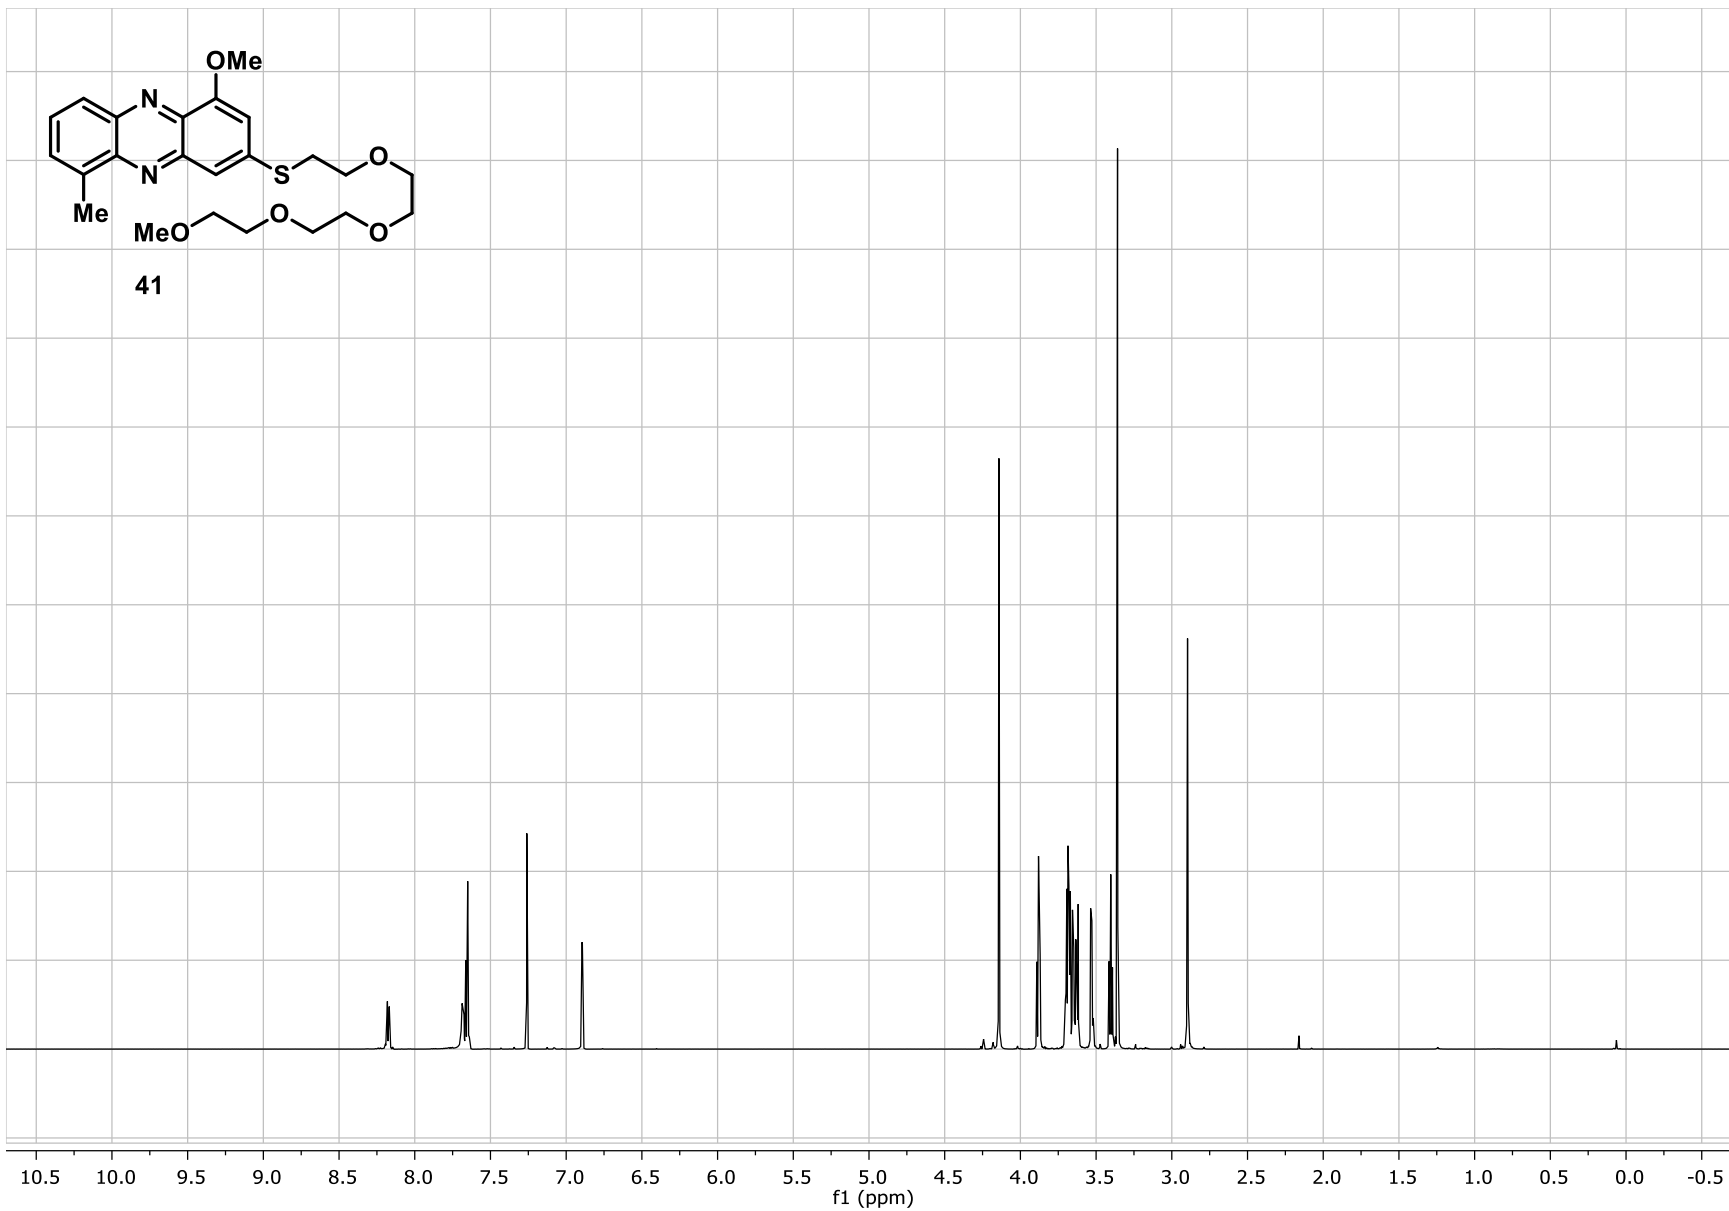

S98

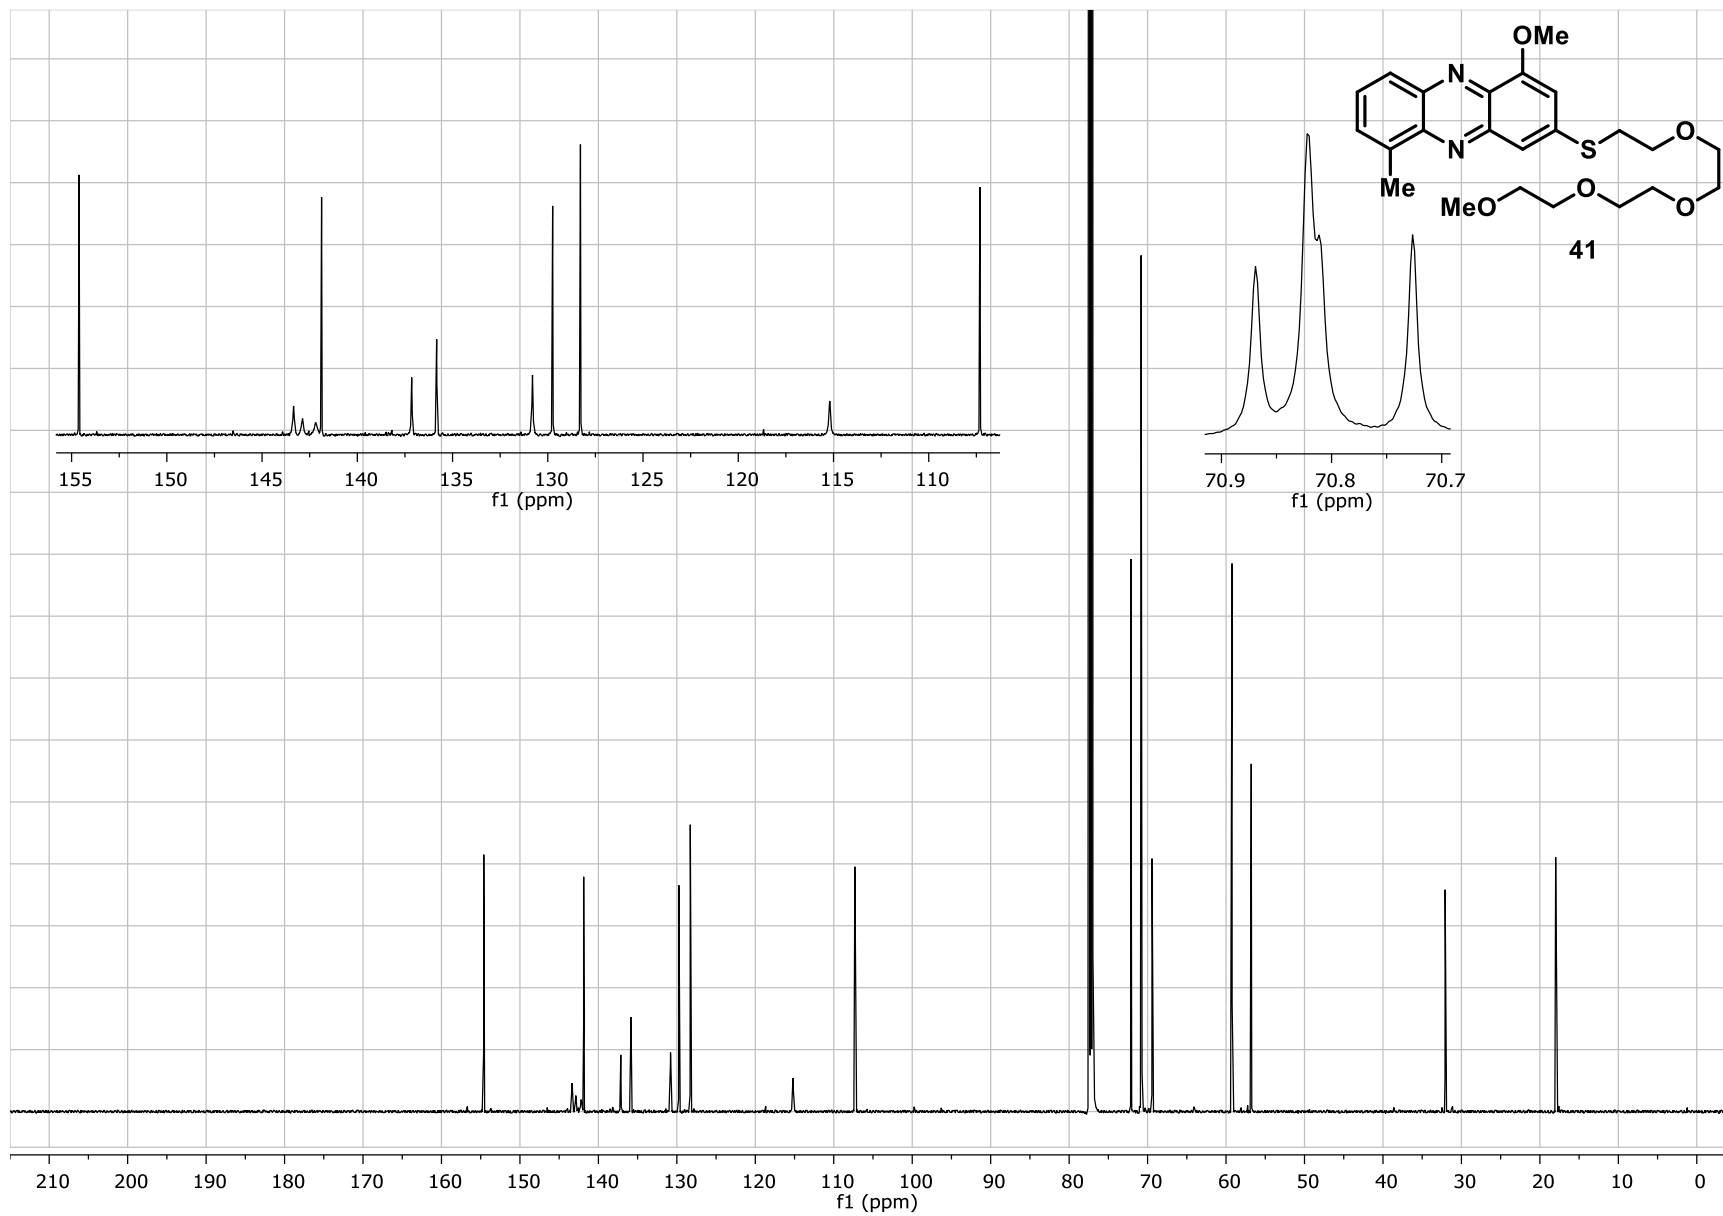

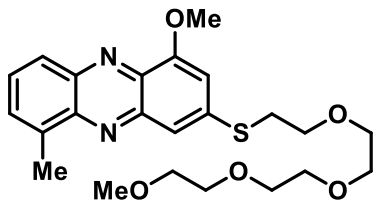

41

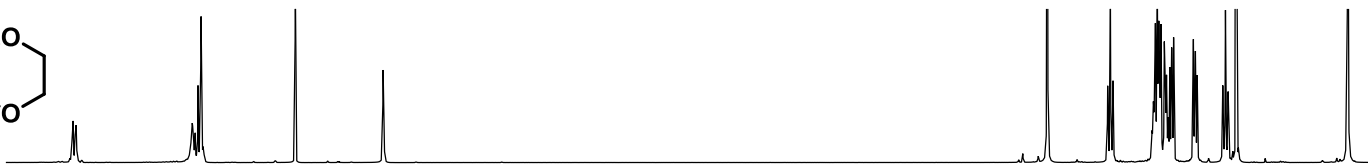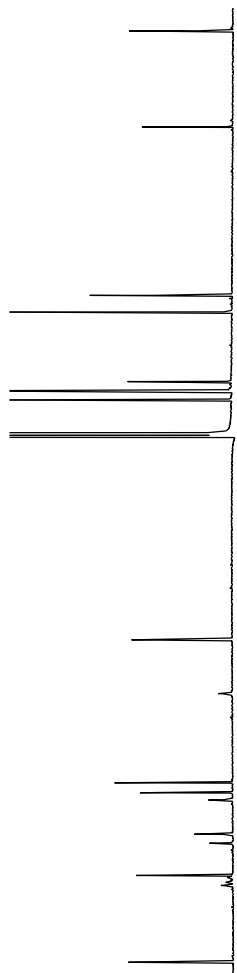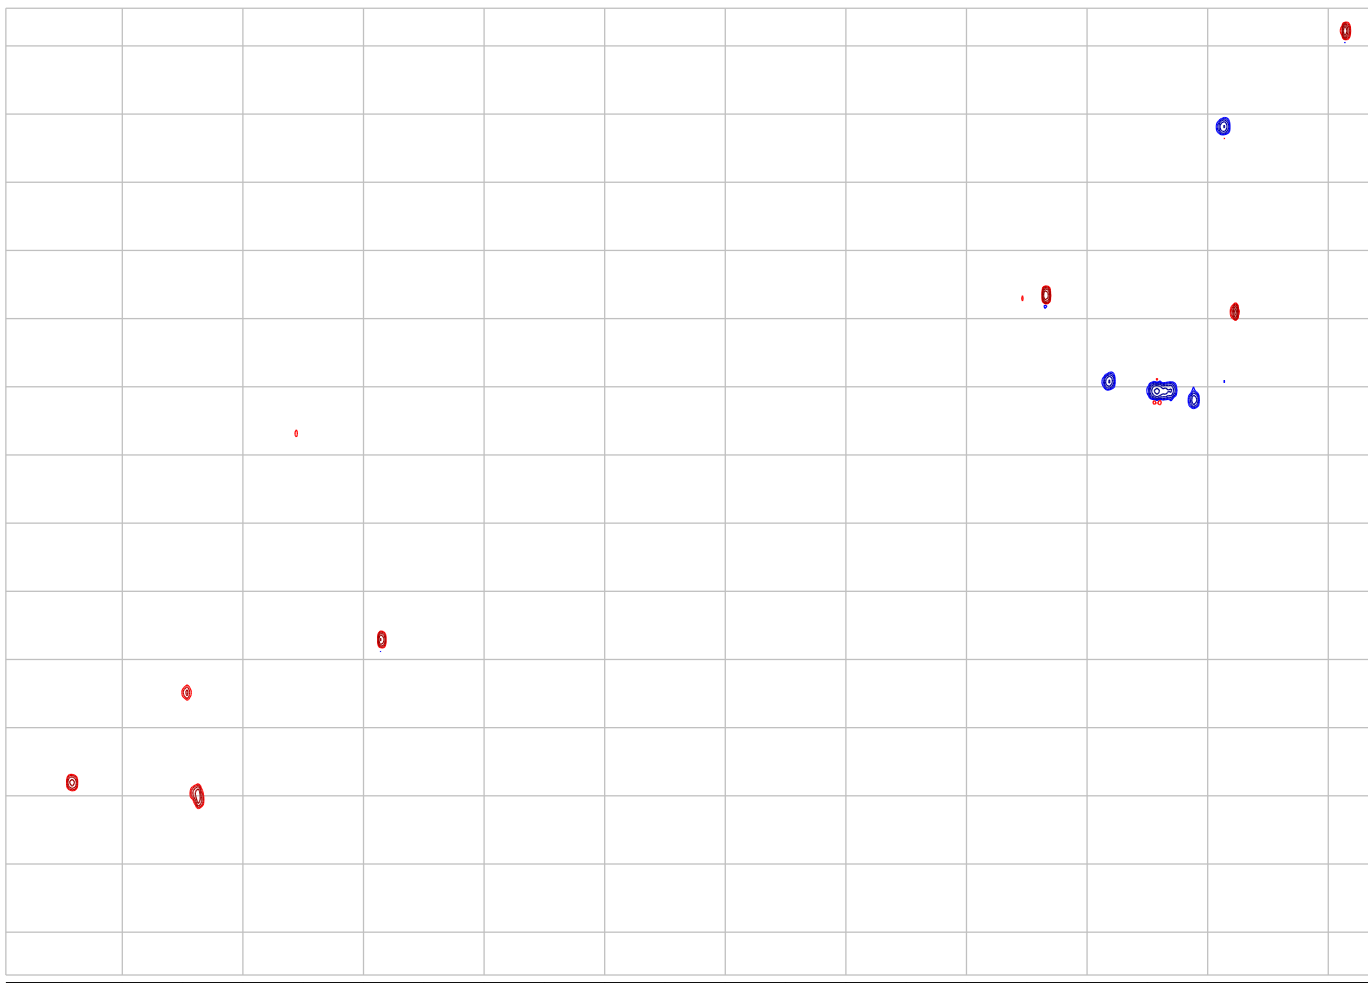

f1 (ppm)

f2 (ppm)

HSQC (full)

S100

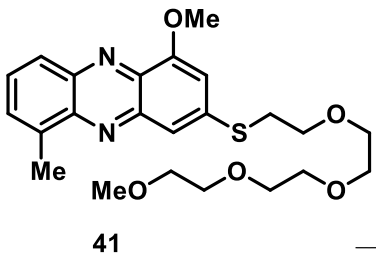

PEG protons indicated

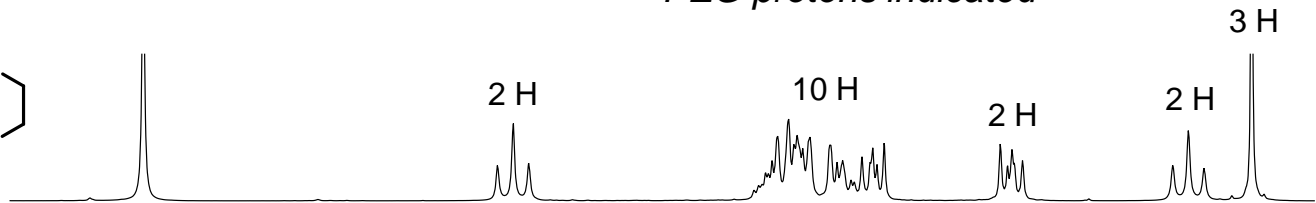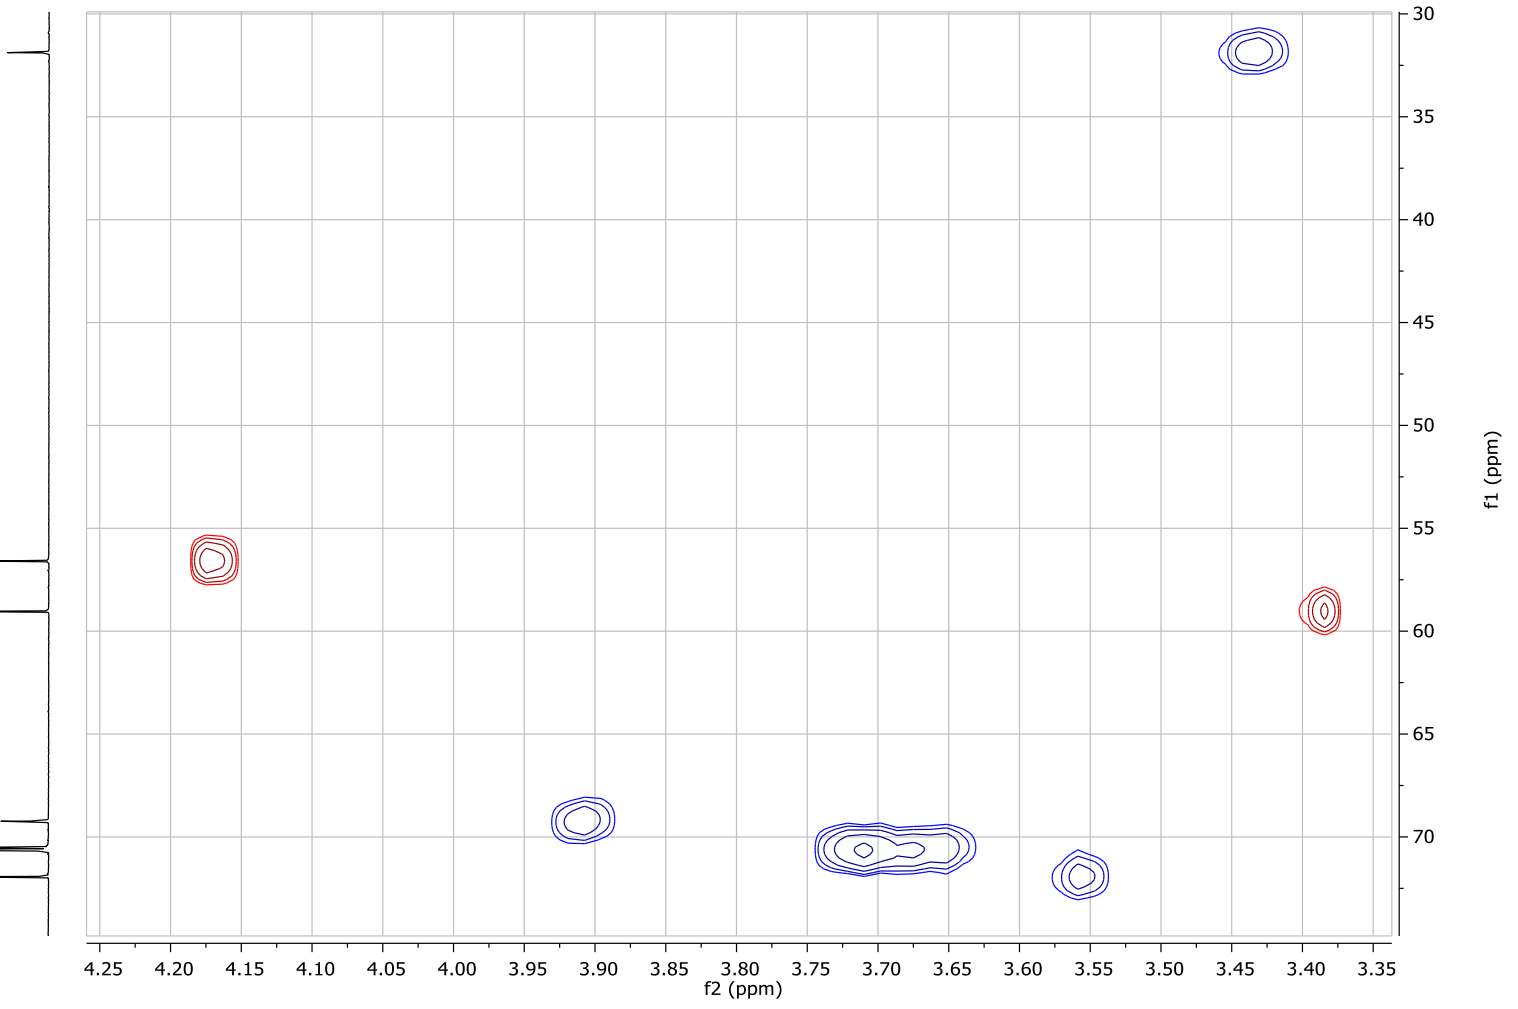

HSQC (zoomed in to relevant region bearing 19 PEG protons)

S101

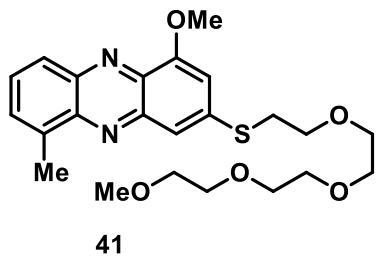

10 protons (3.72 - 3.60 ppm)

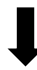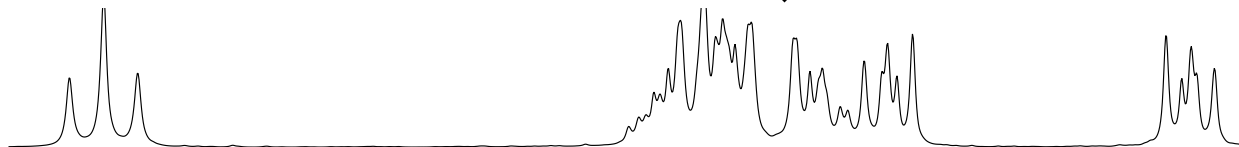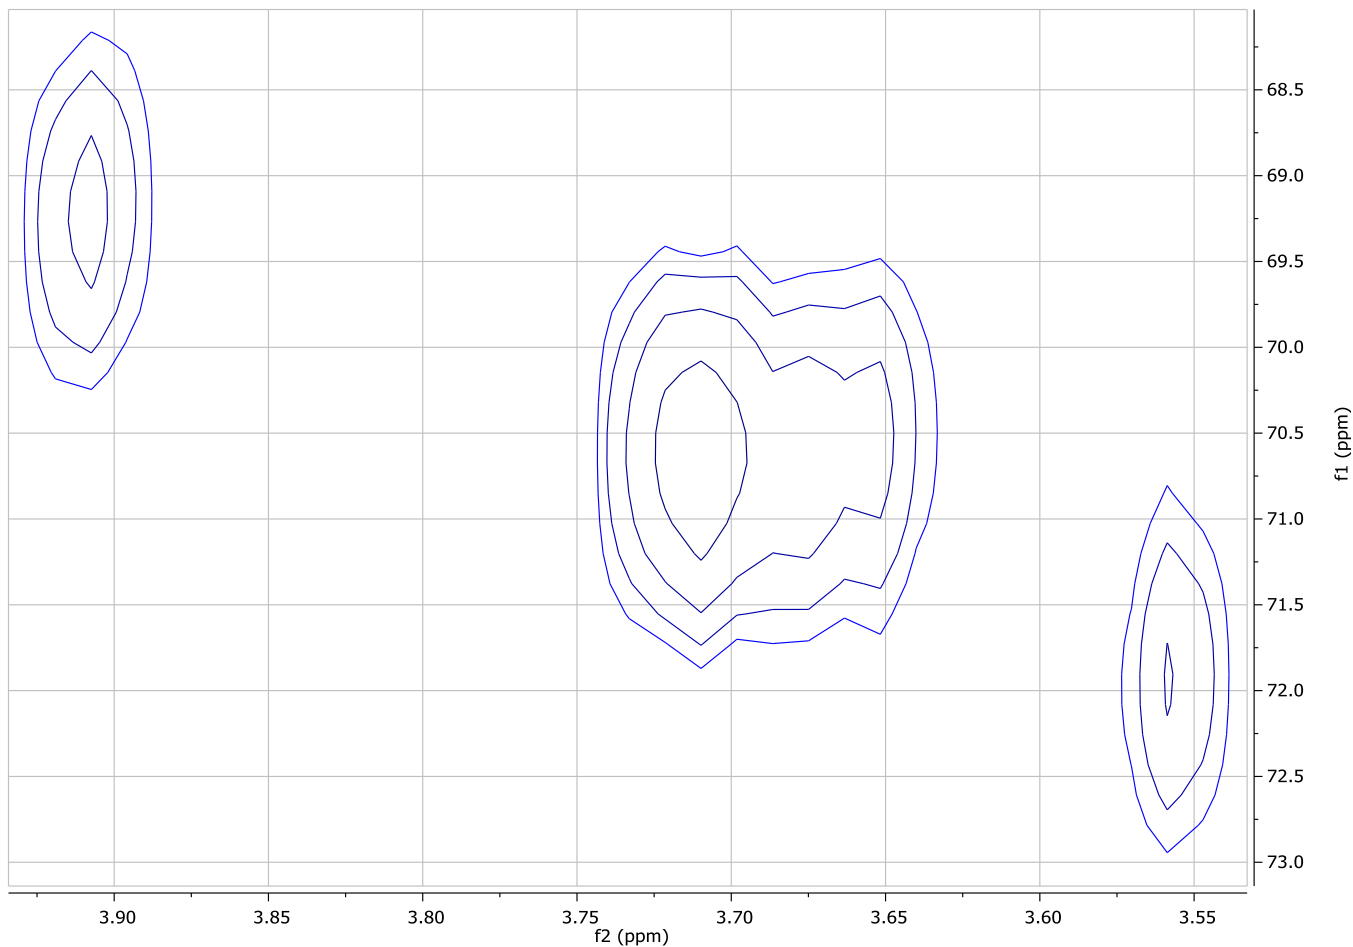

5 carbon atoms  
4 clear signals  
(1 overlap)

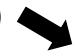

HSQC (zoomed in to show 10 protons on the PEG moiety on 5 carbon atoms in this region)

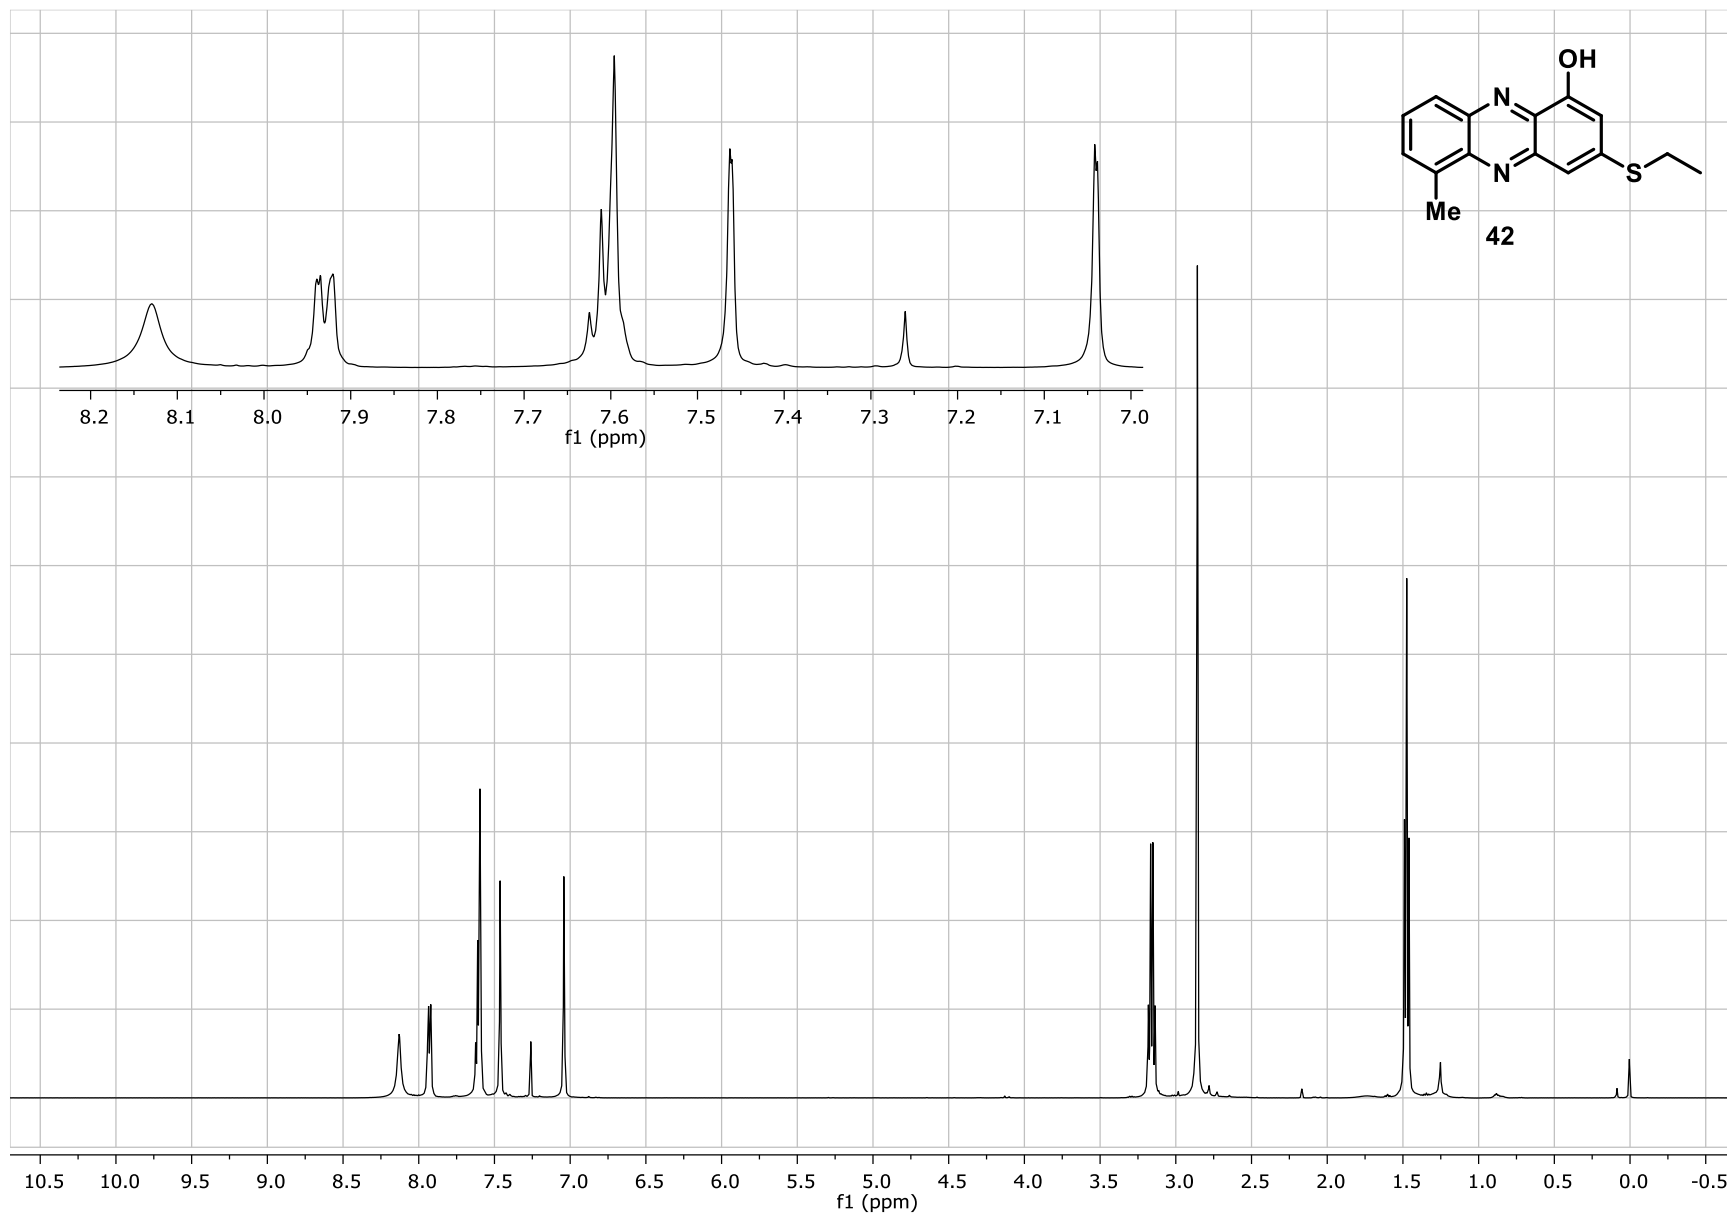

S103

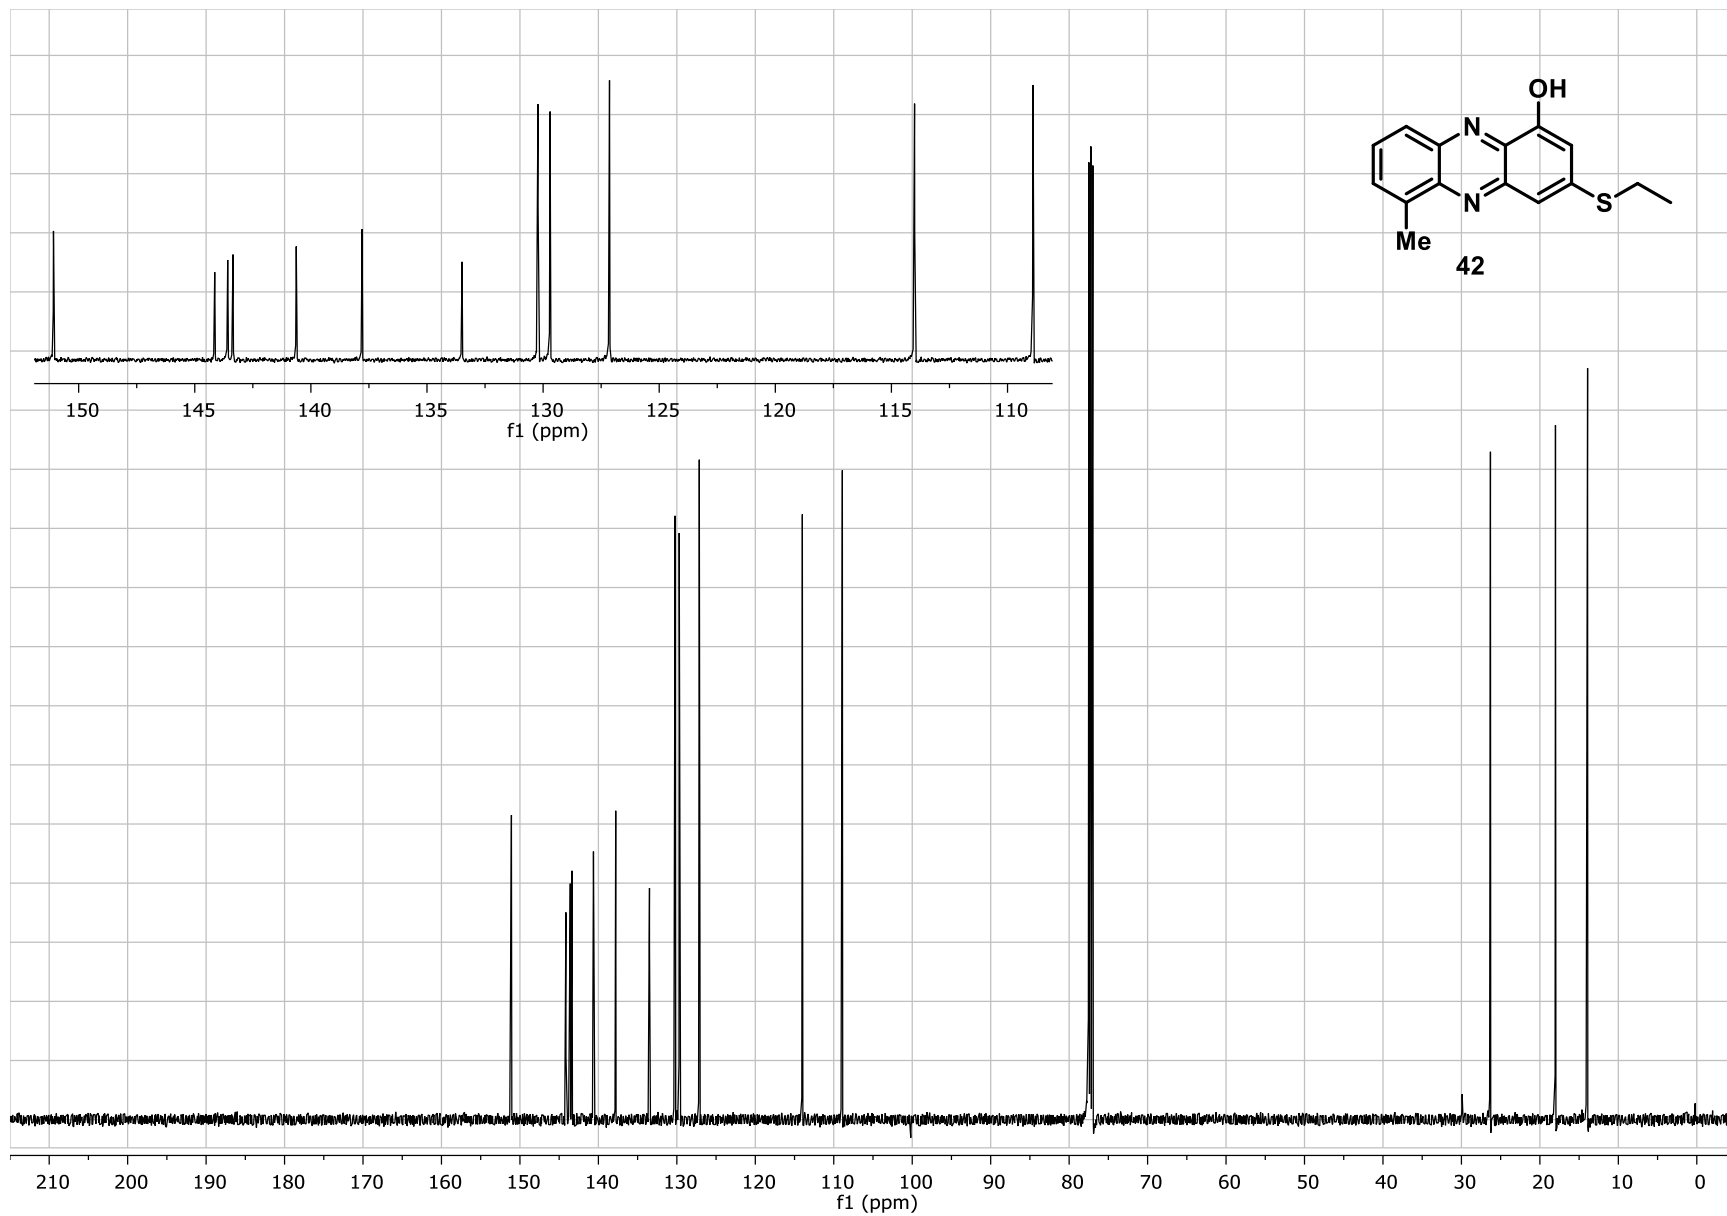

S104



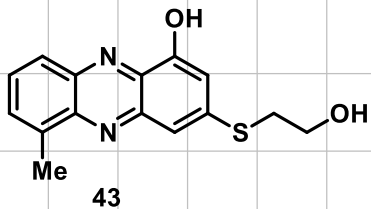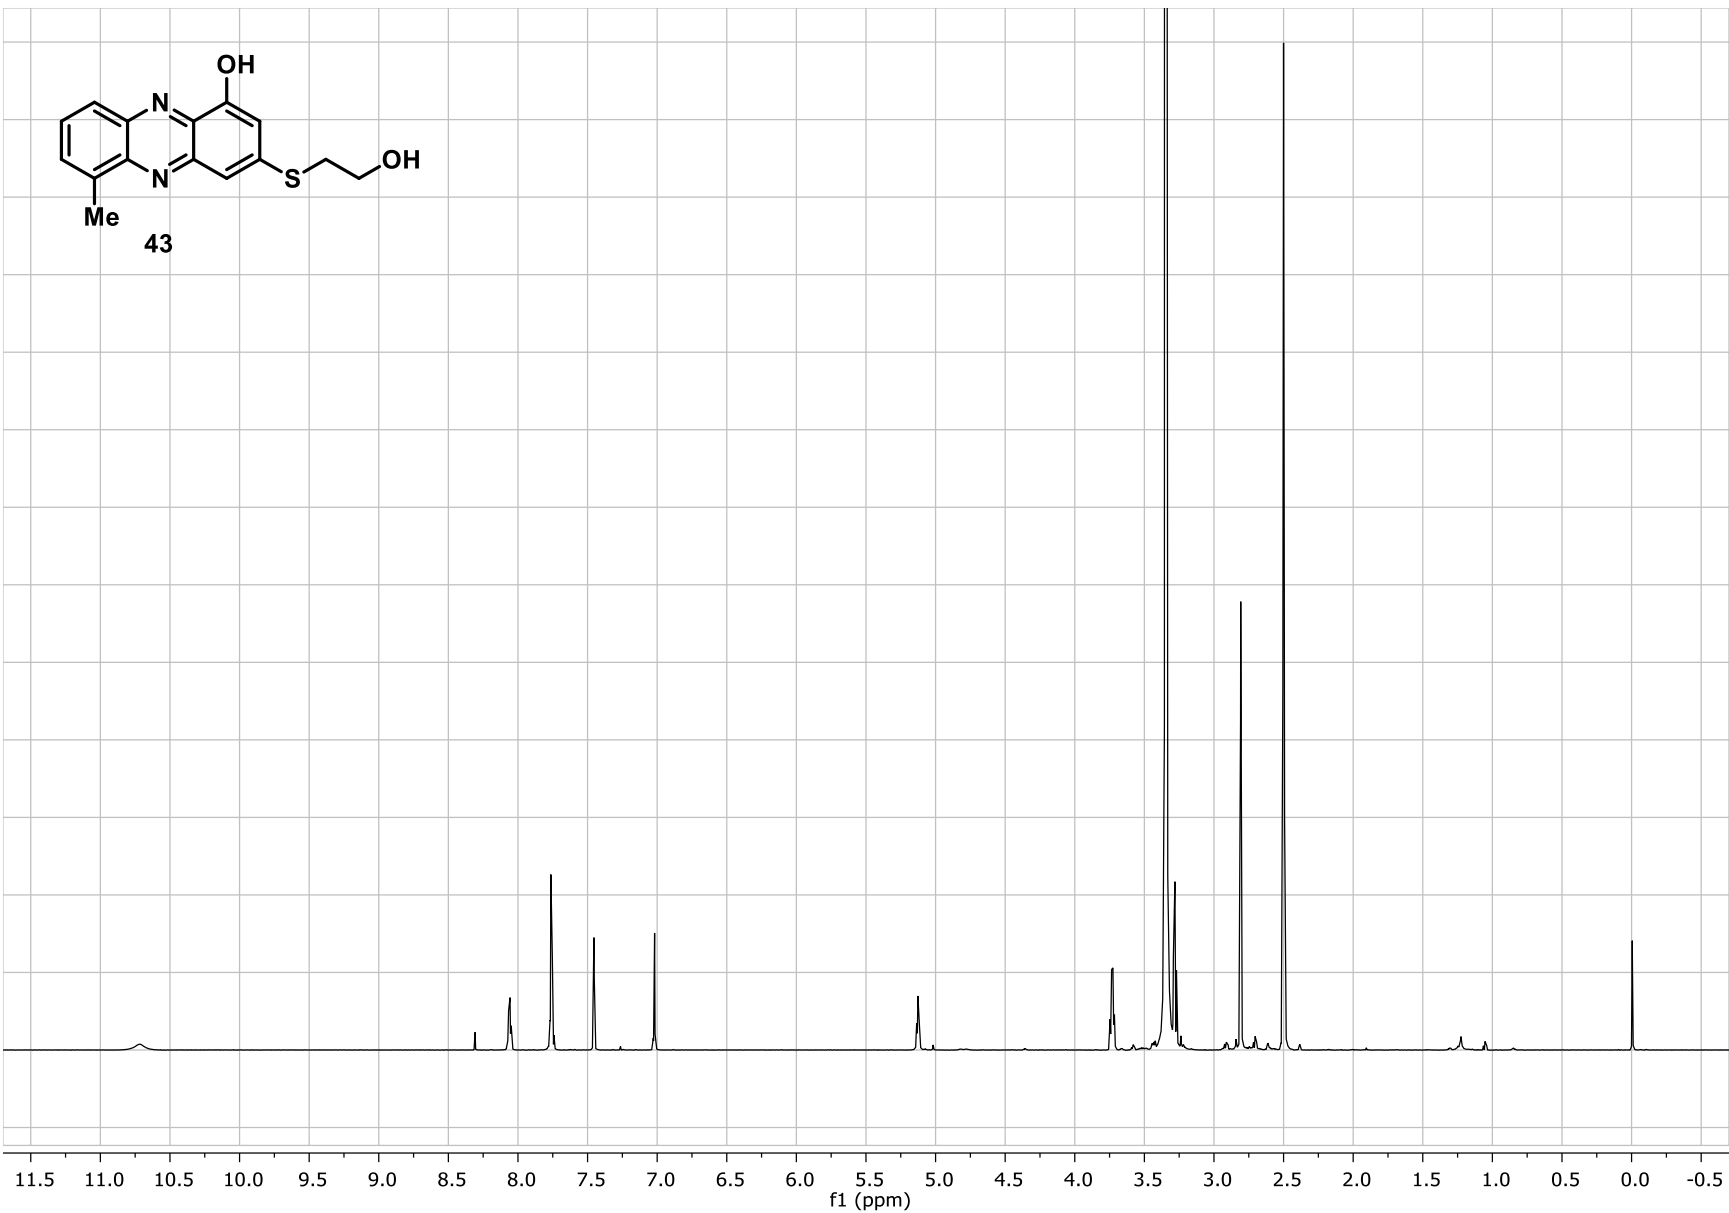

S105

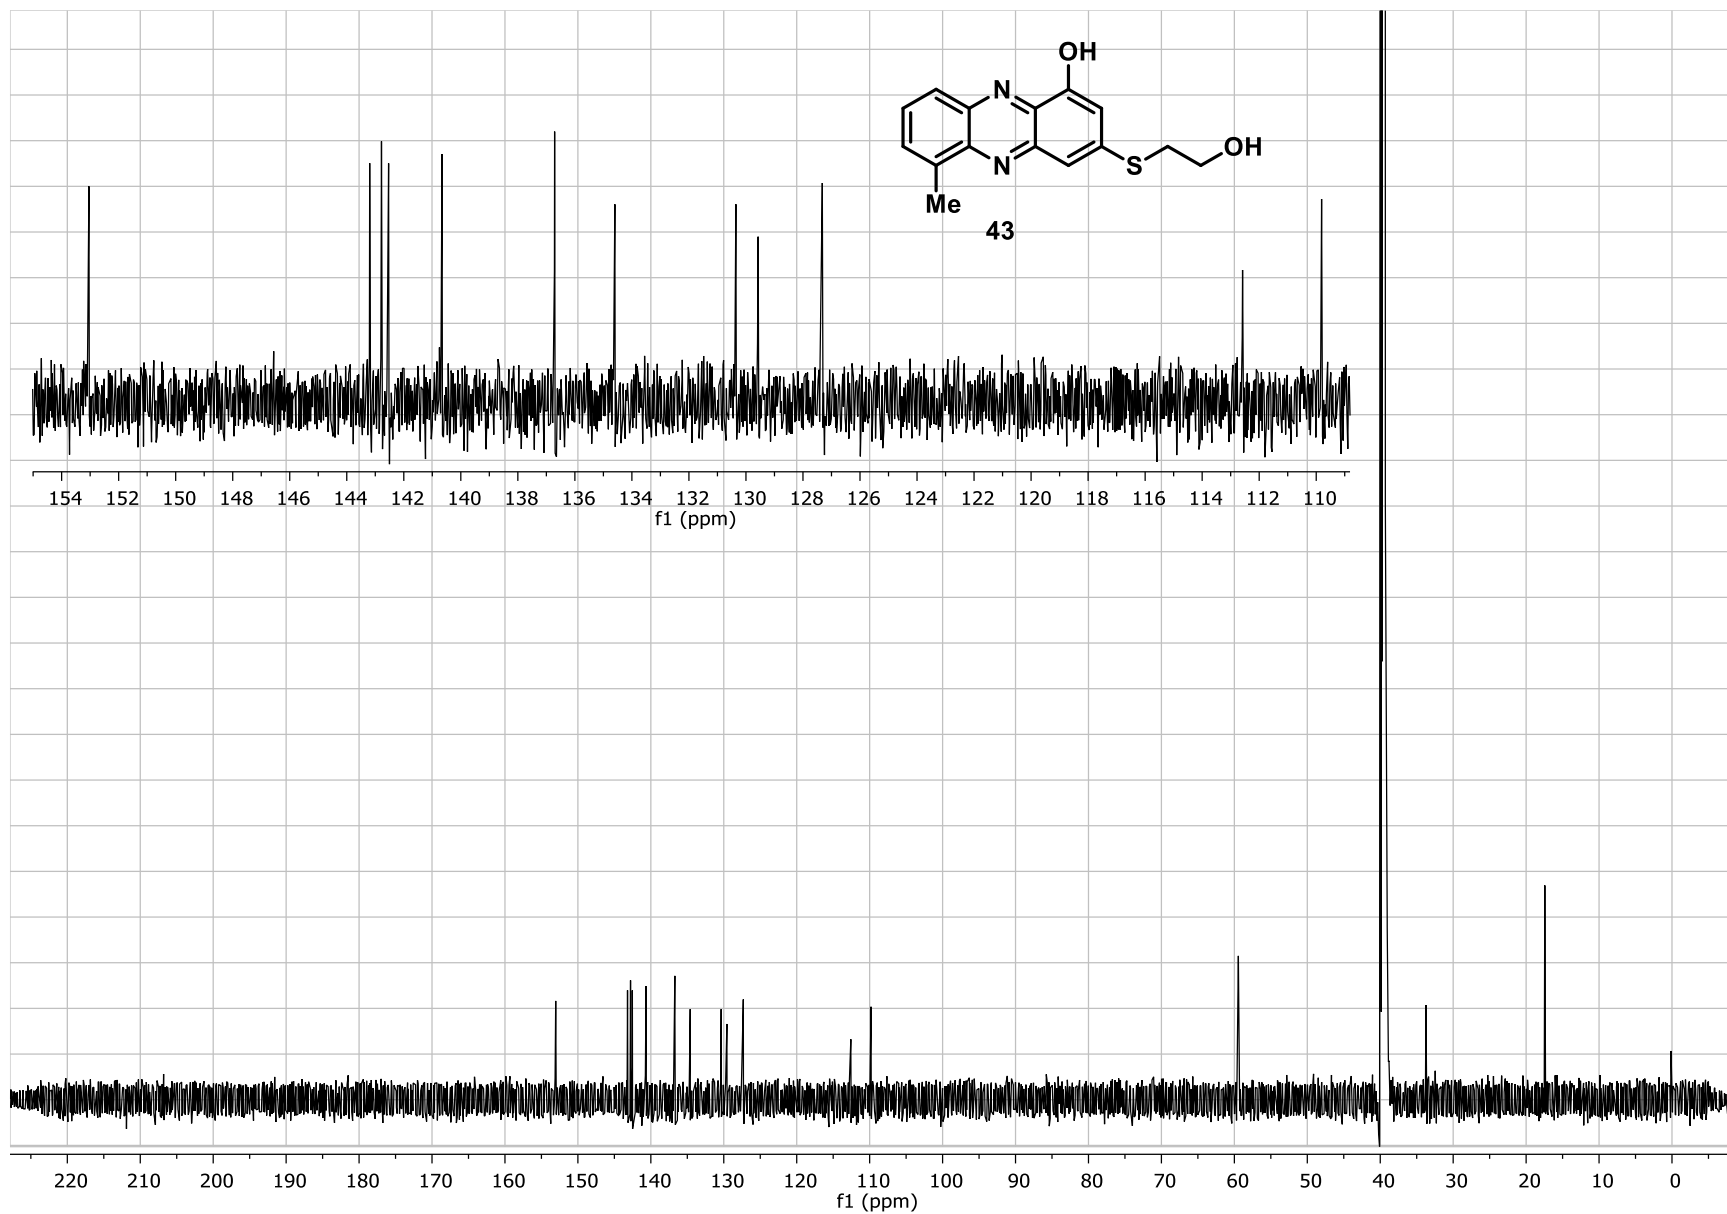

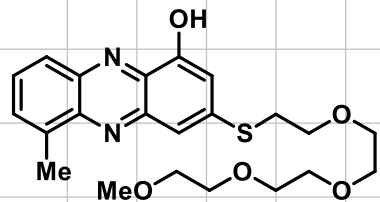

44

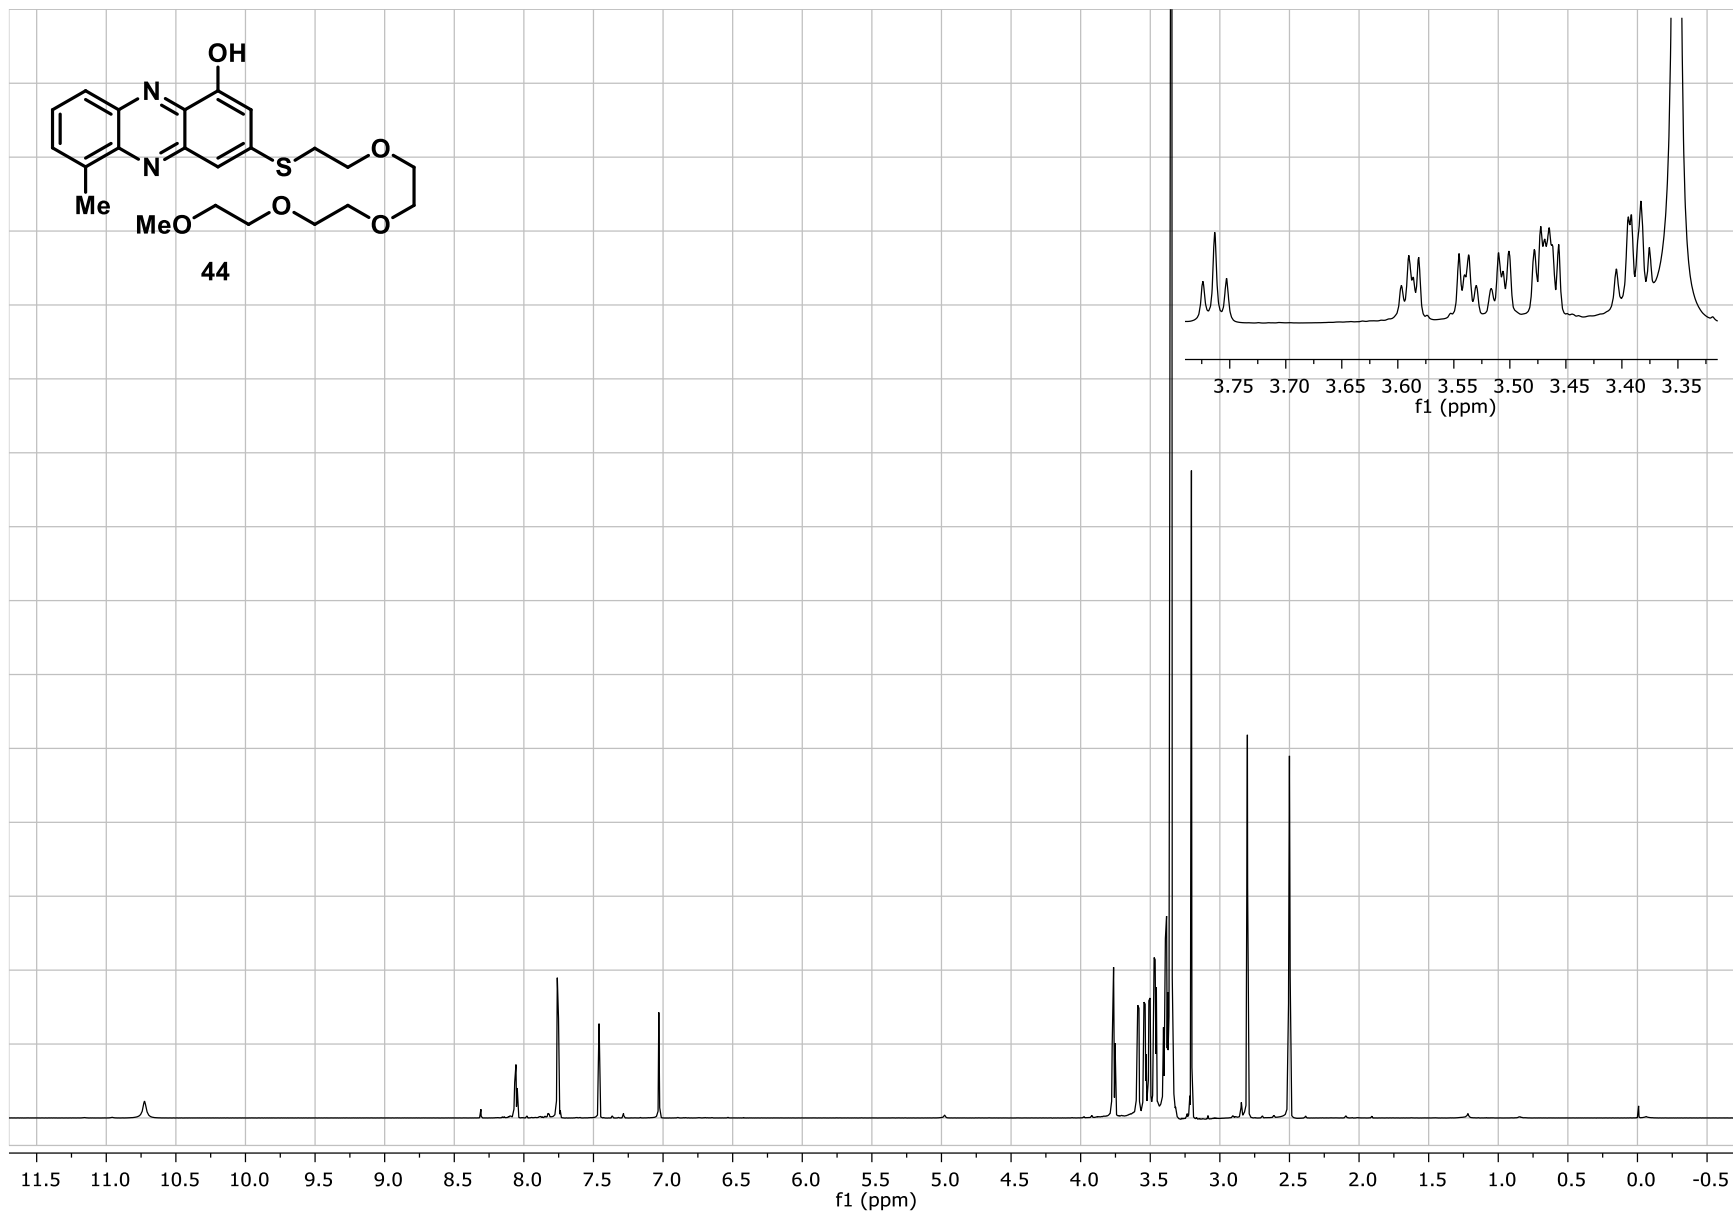

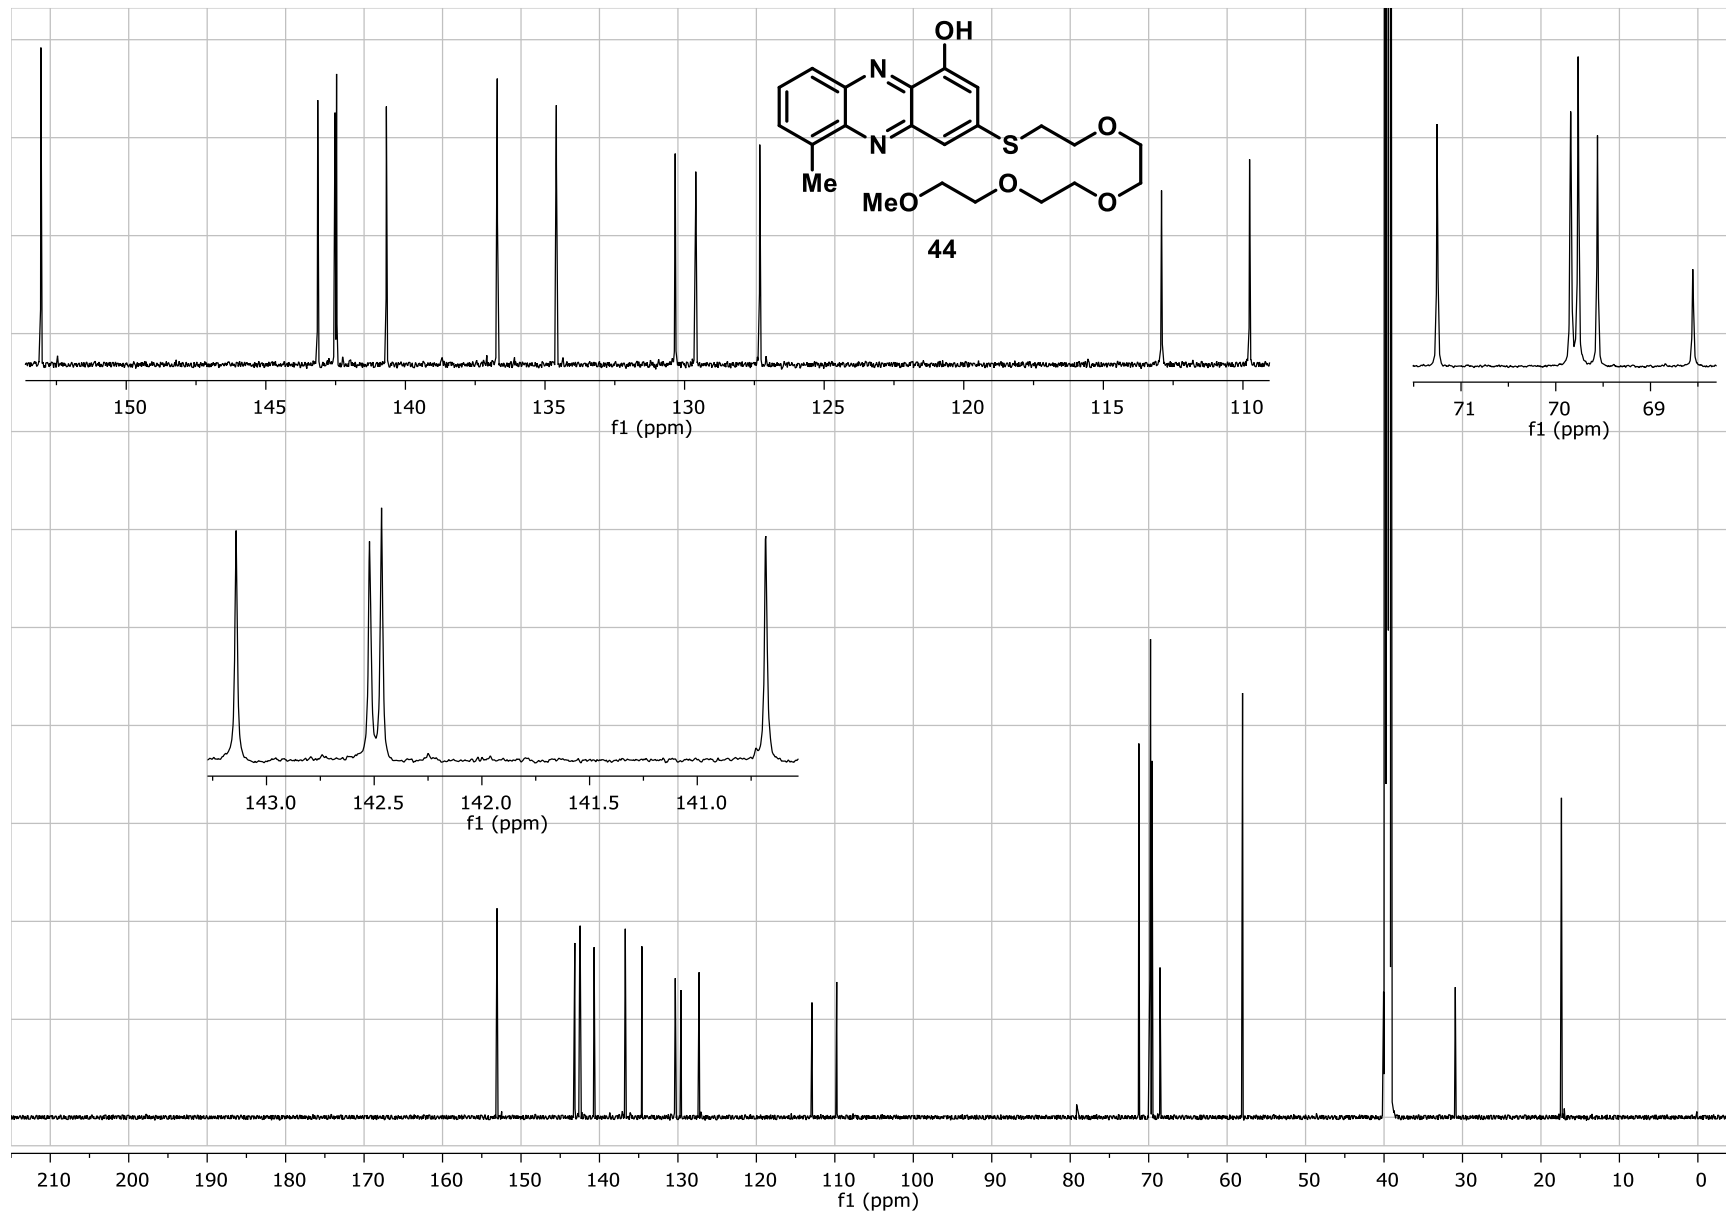

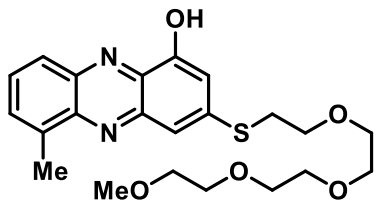

44

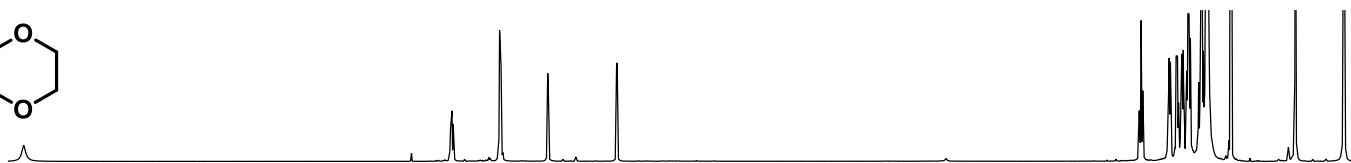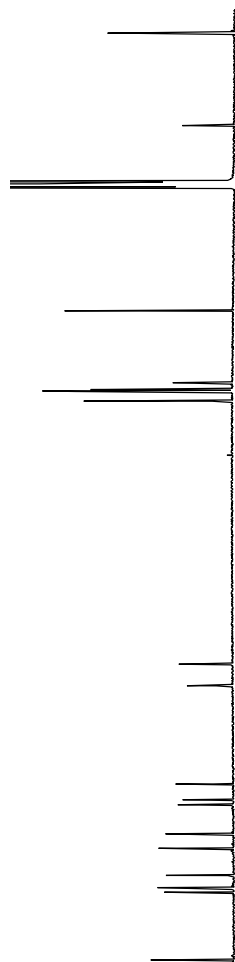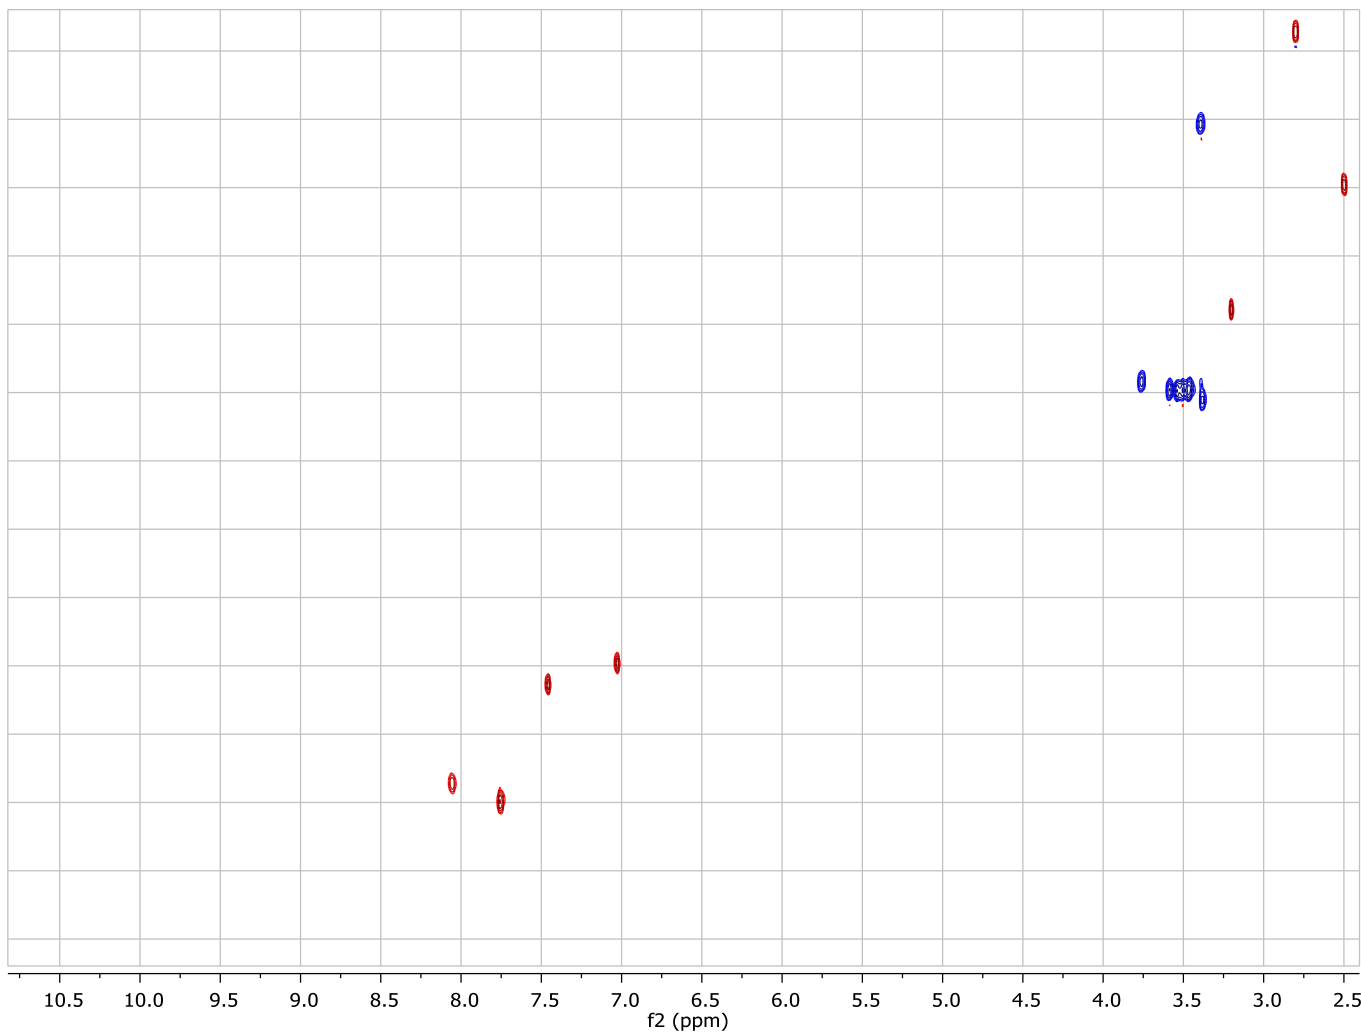

f1 (ppm)

f2 (ppm)

HSQC (full)

S109

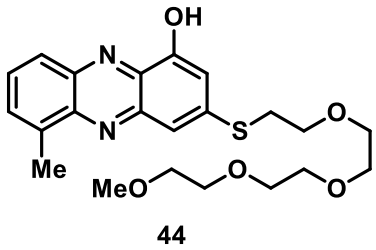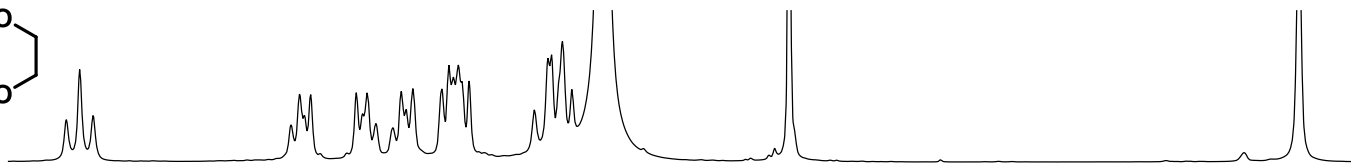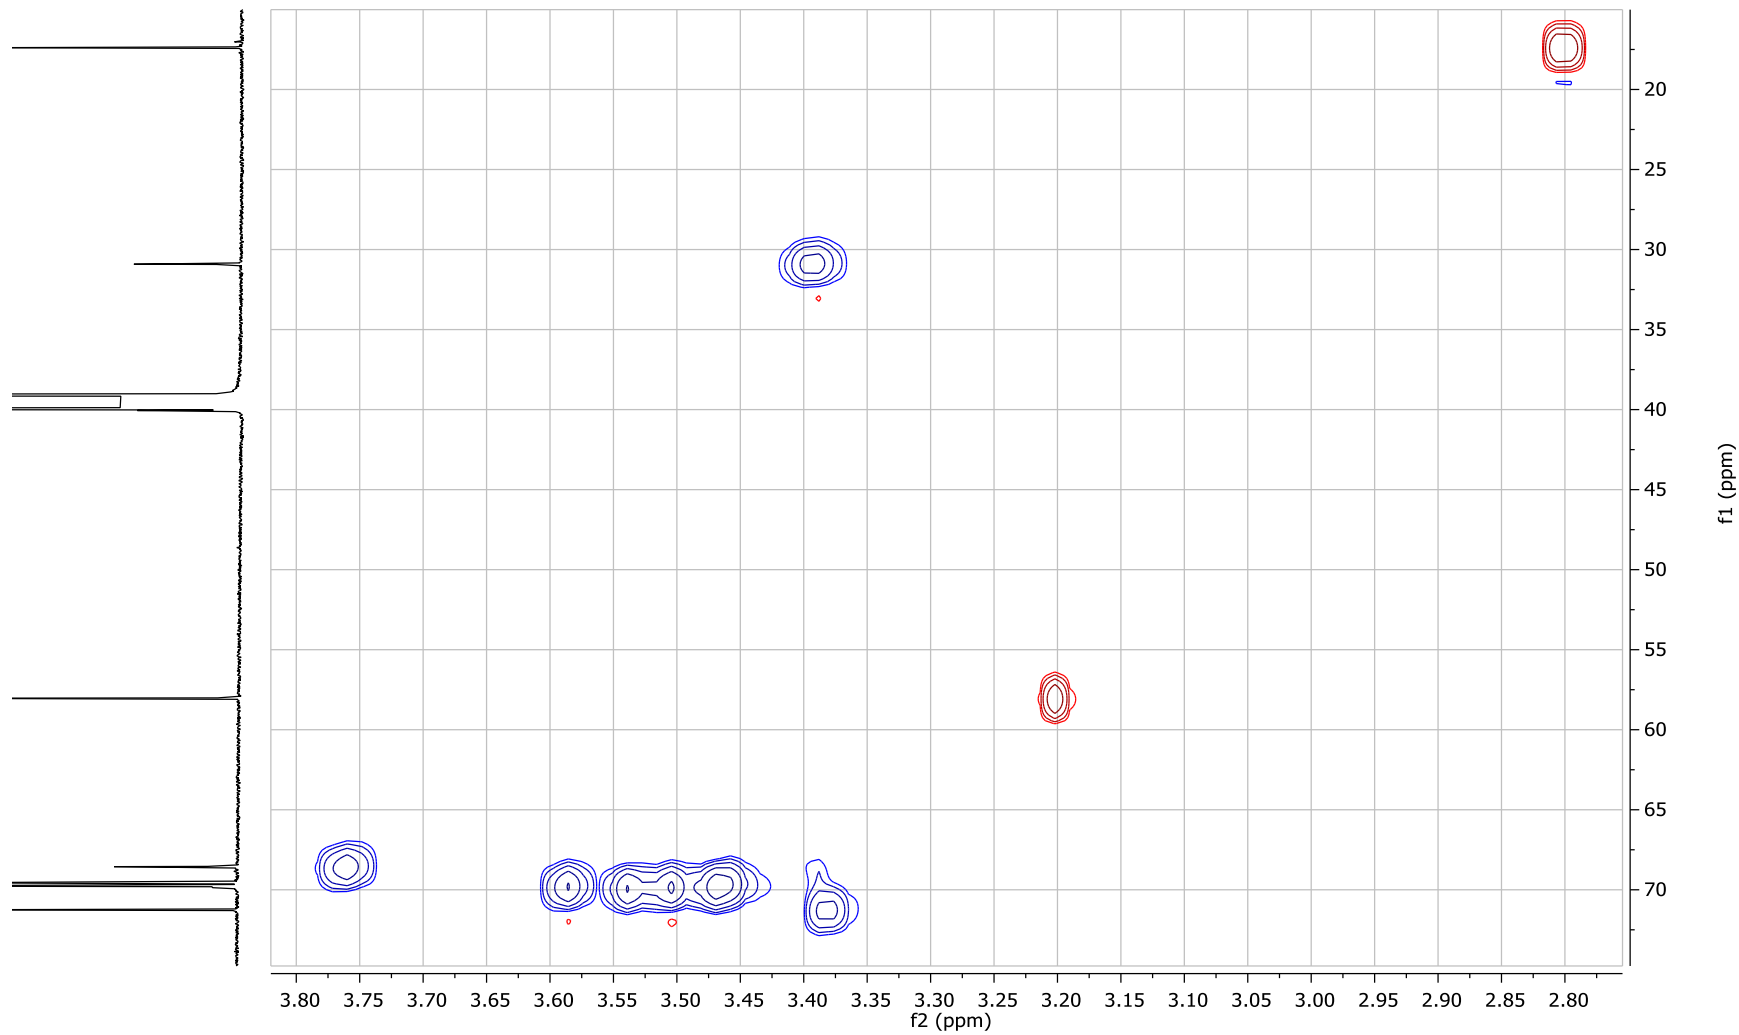

HSQC (zoomed in)

S110

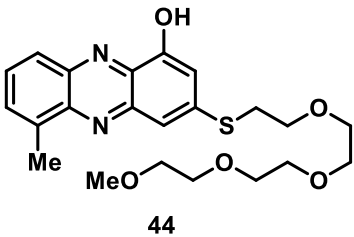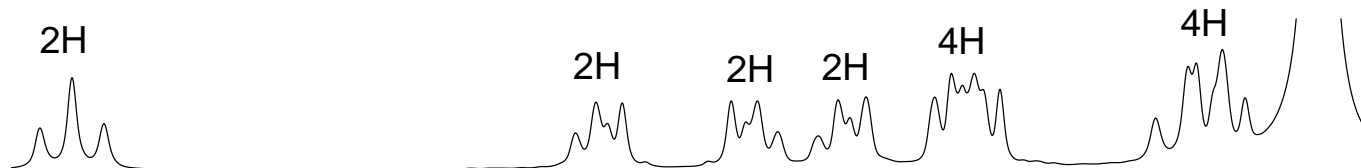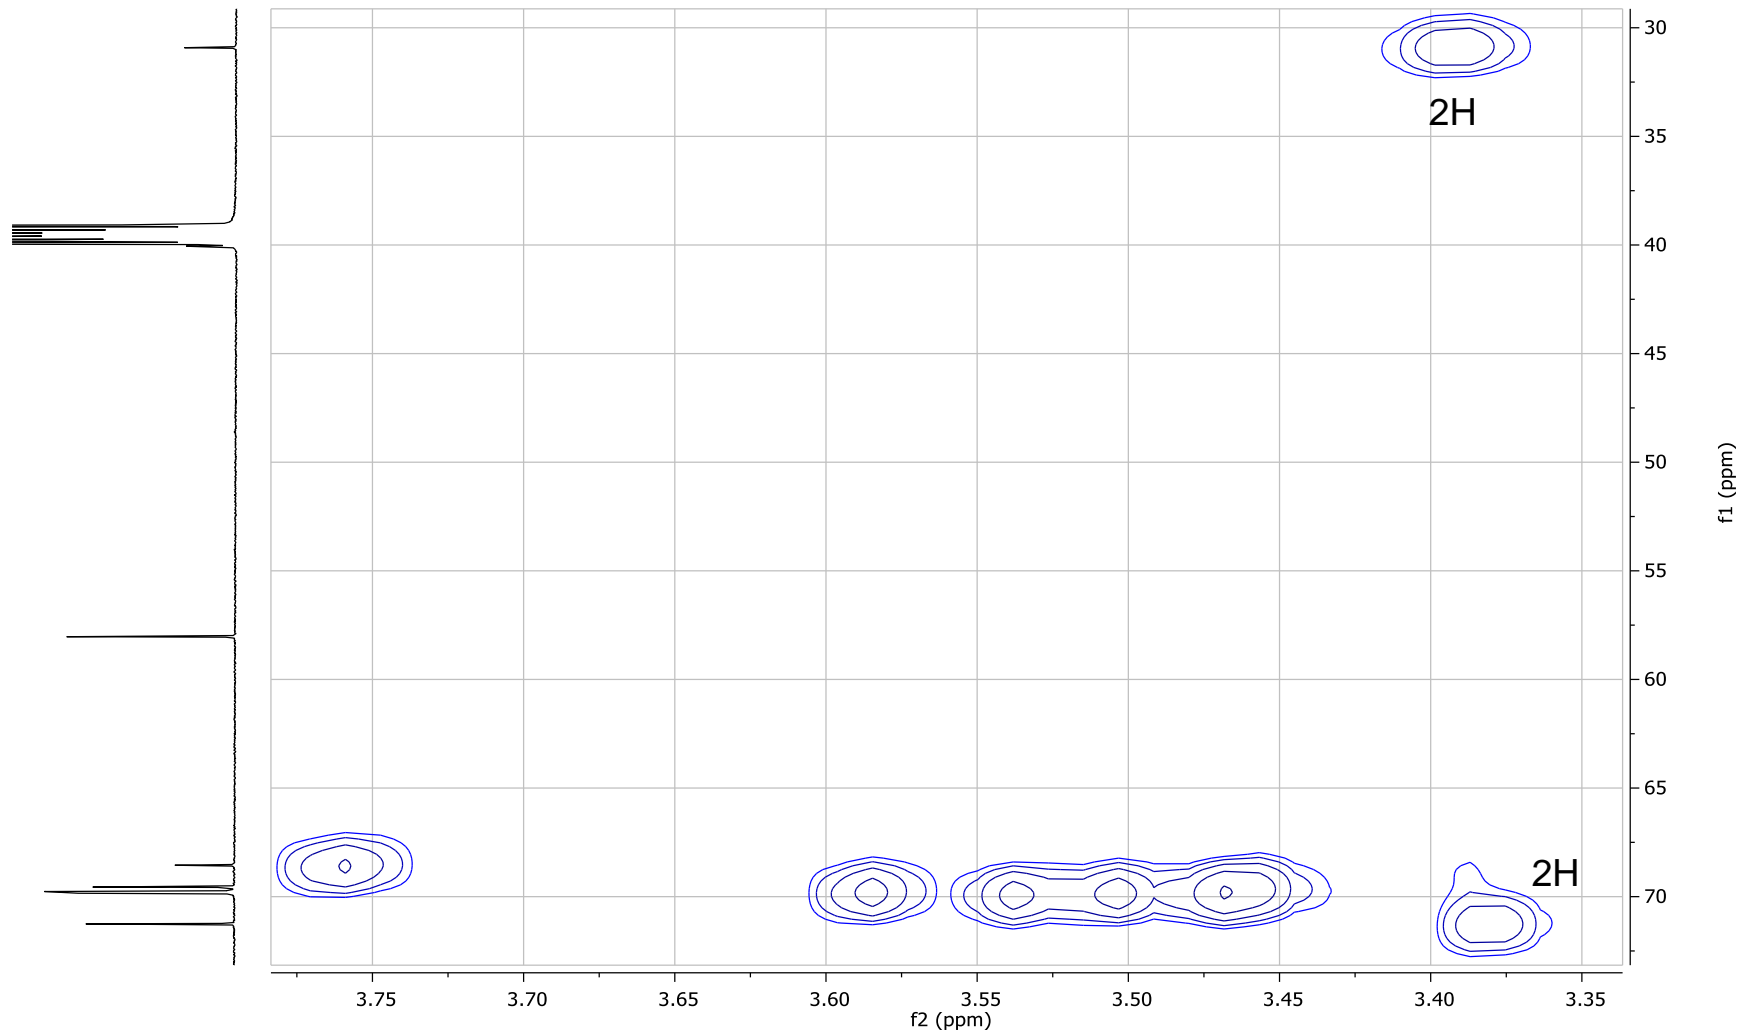

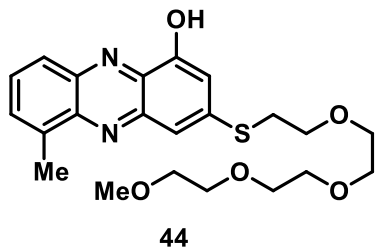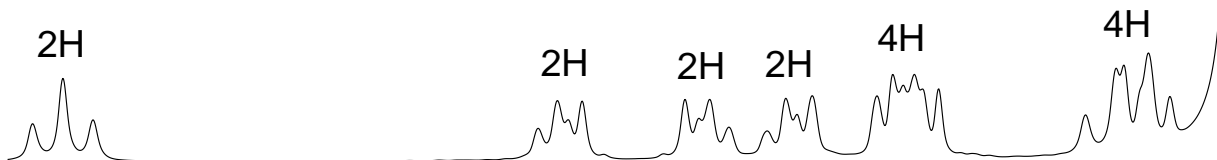

7 carbon atoms  
14 protons

5 carbon signals  
(2 missing due to overlap ~70 ppm)

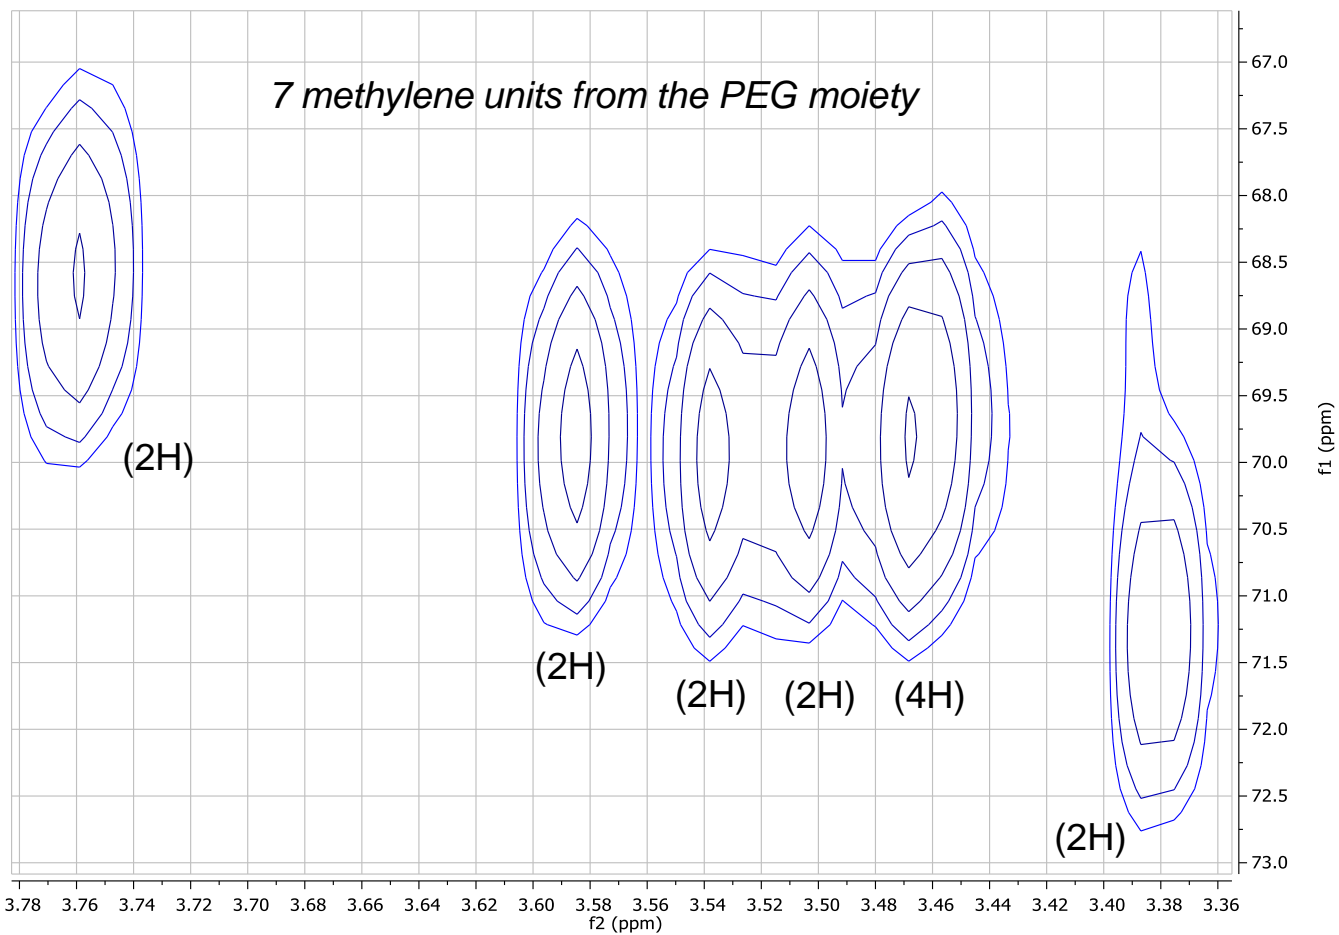



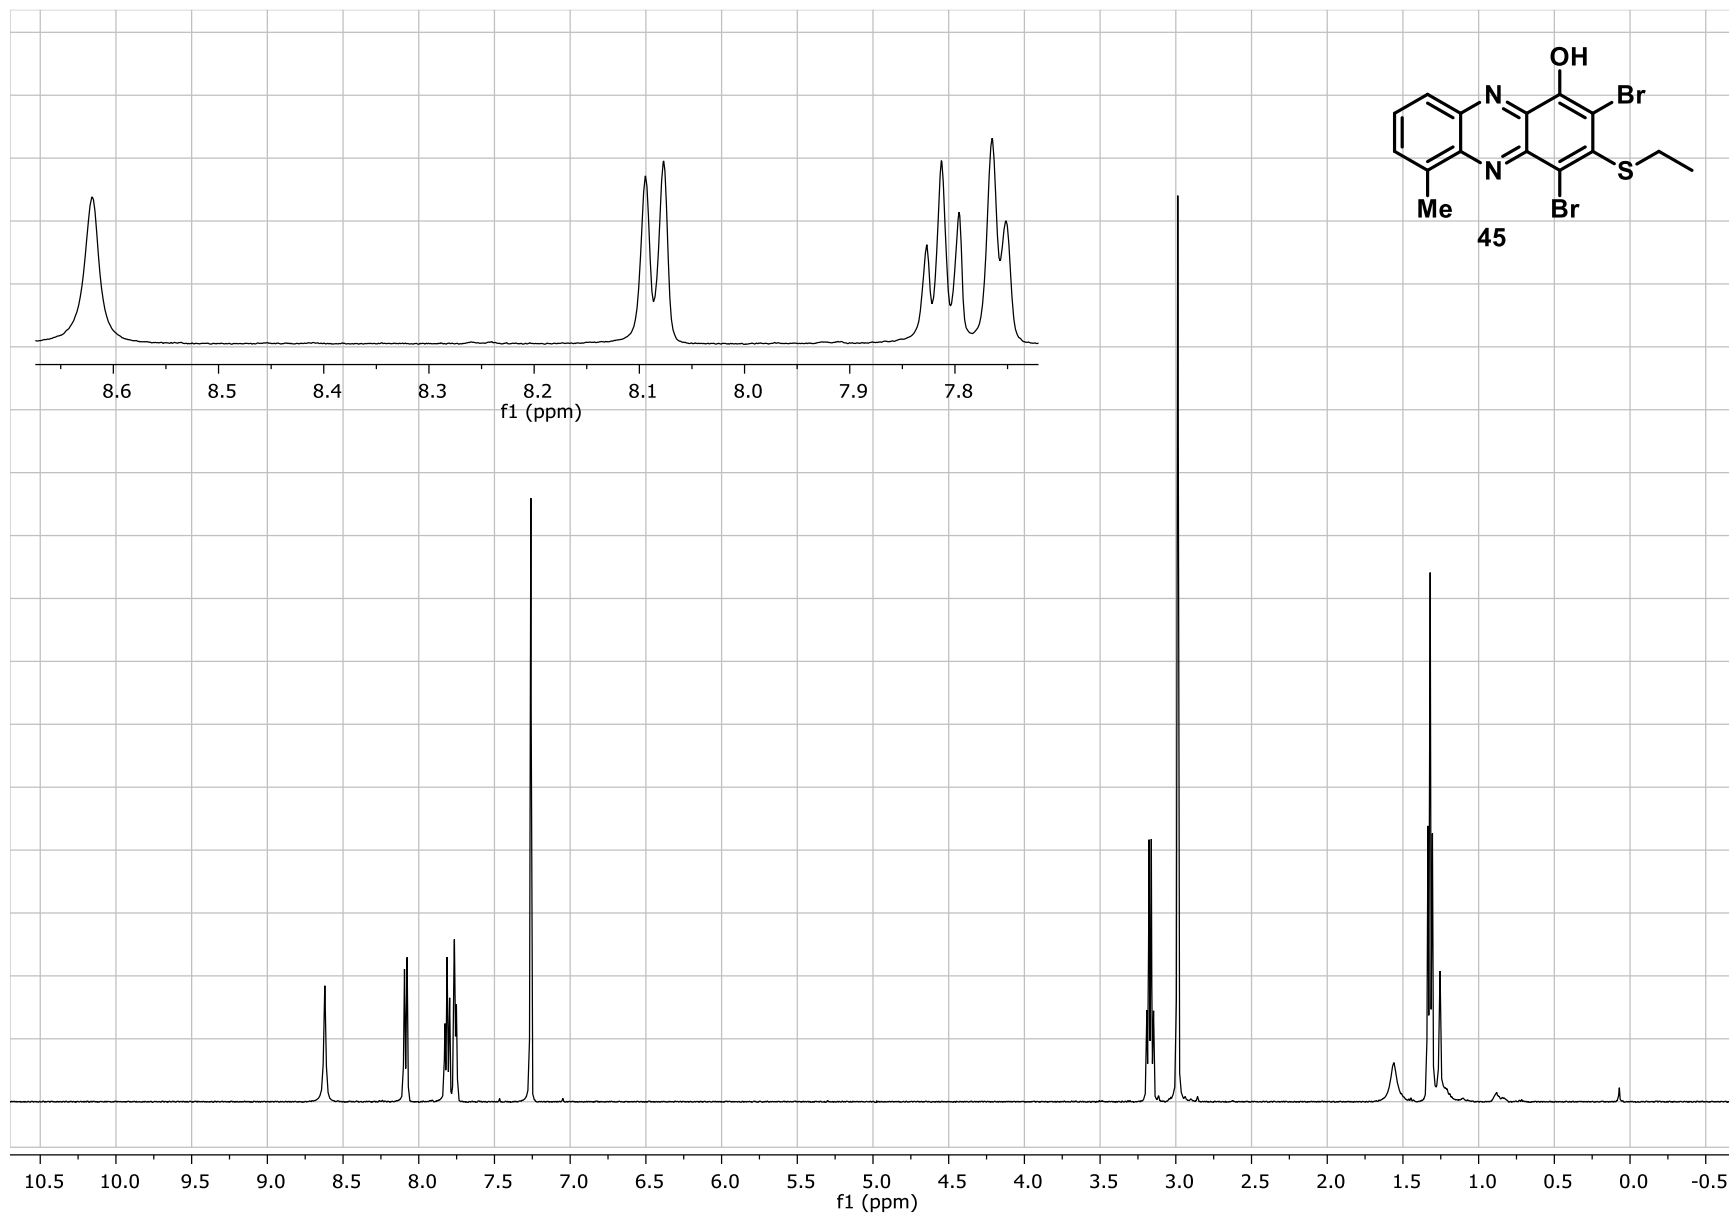

S113

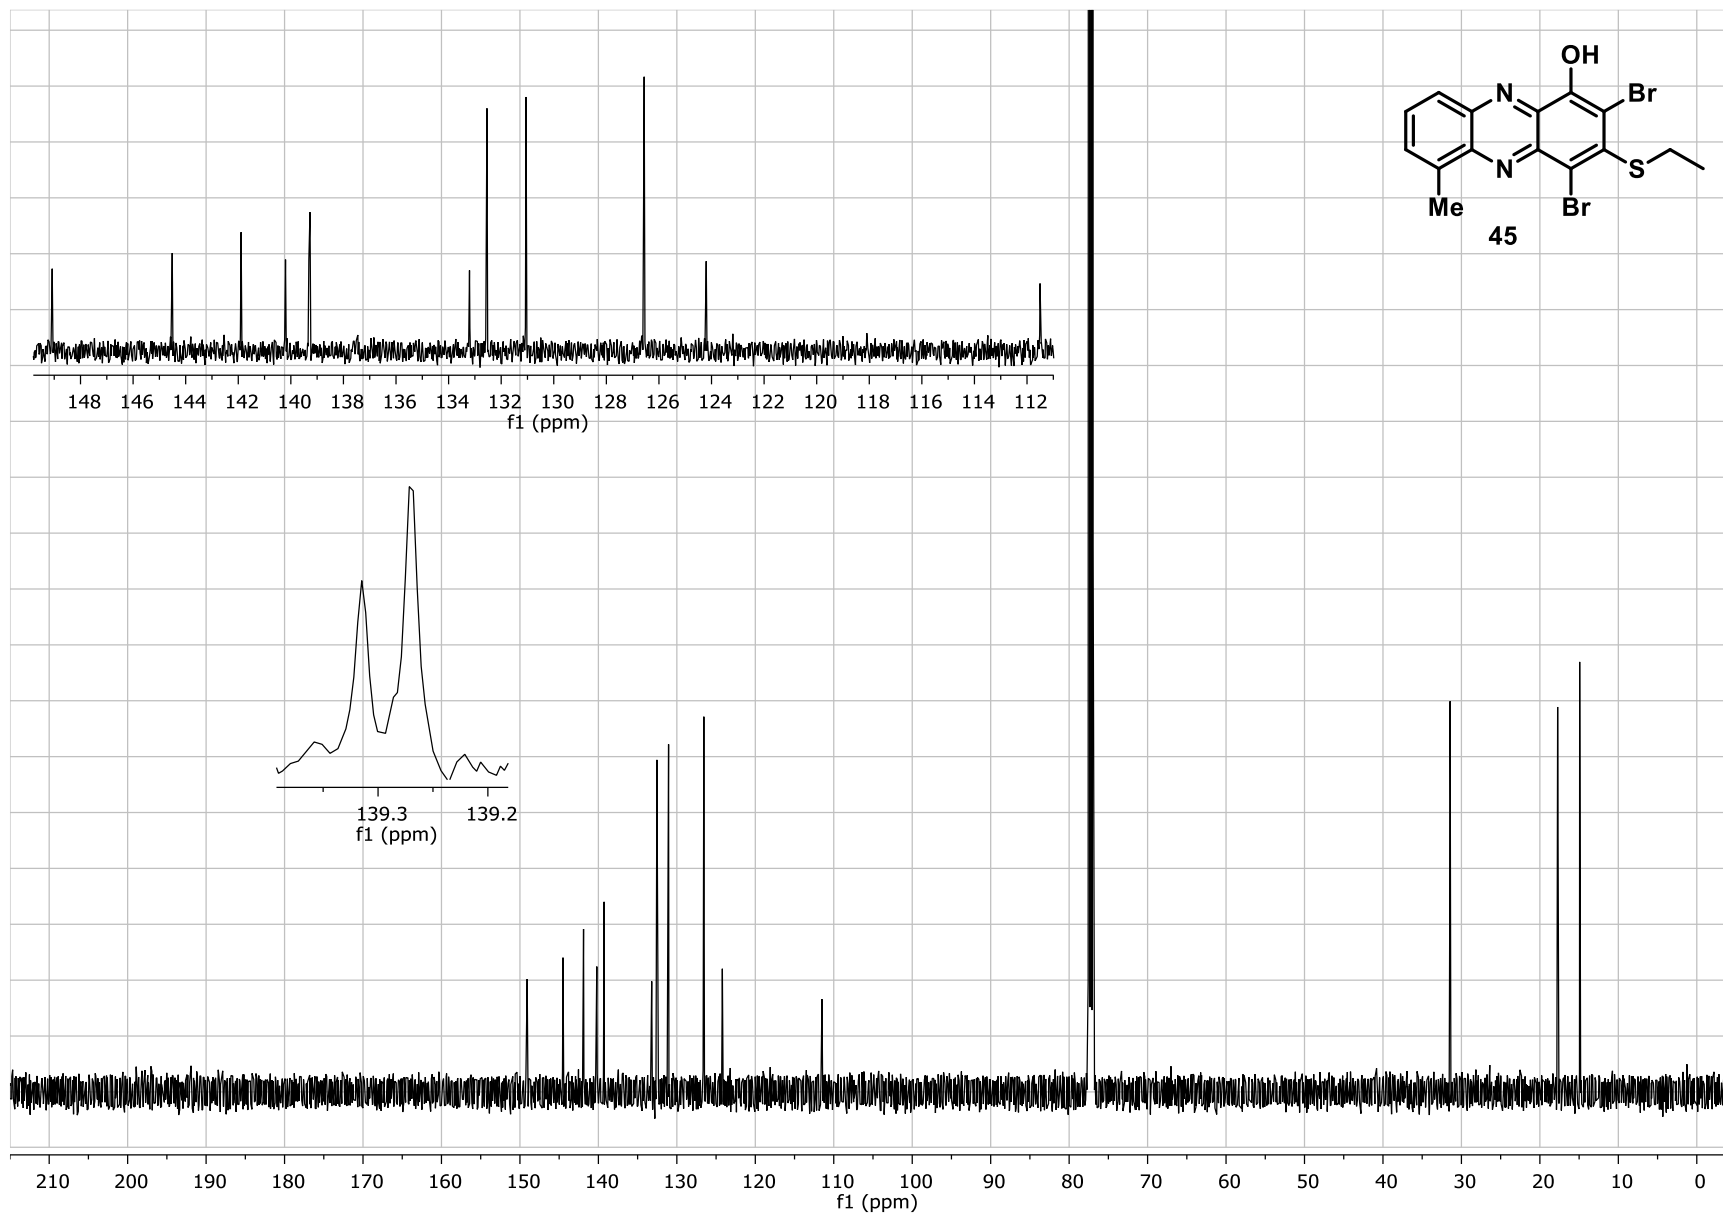



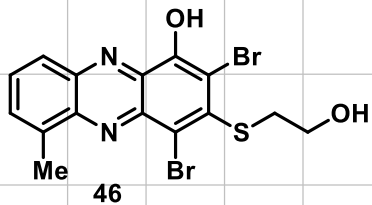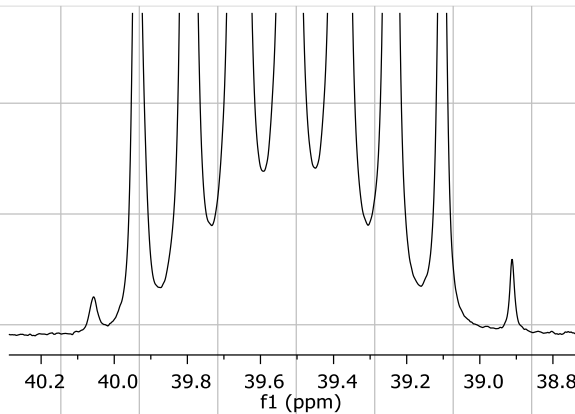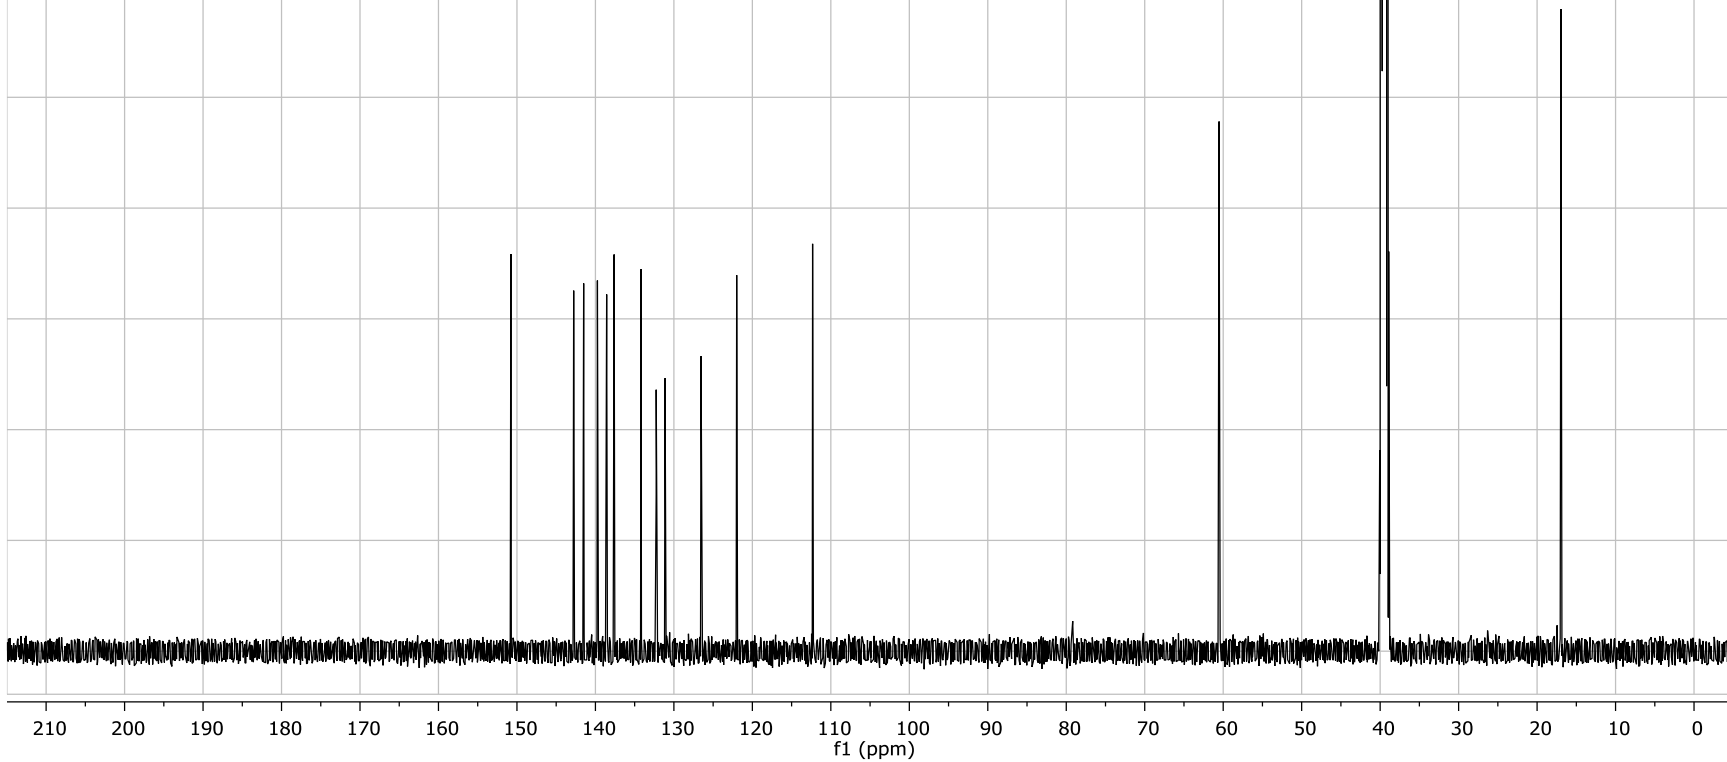

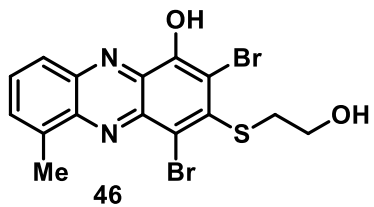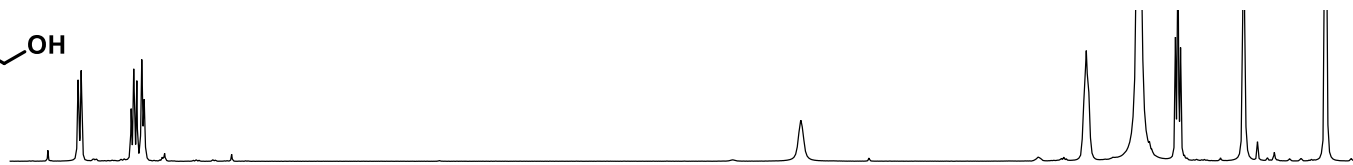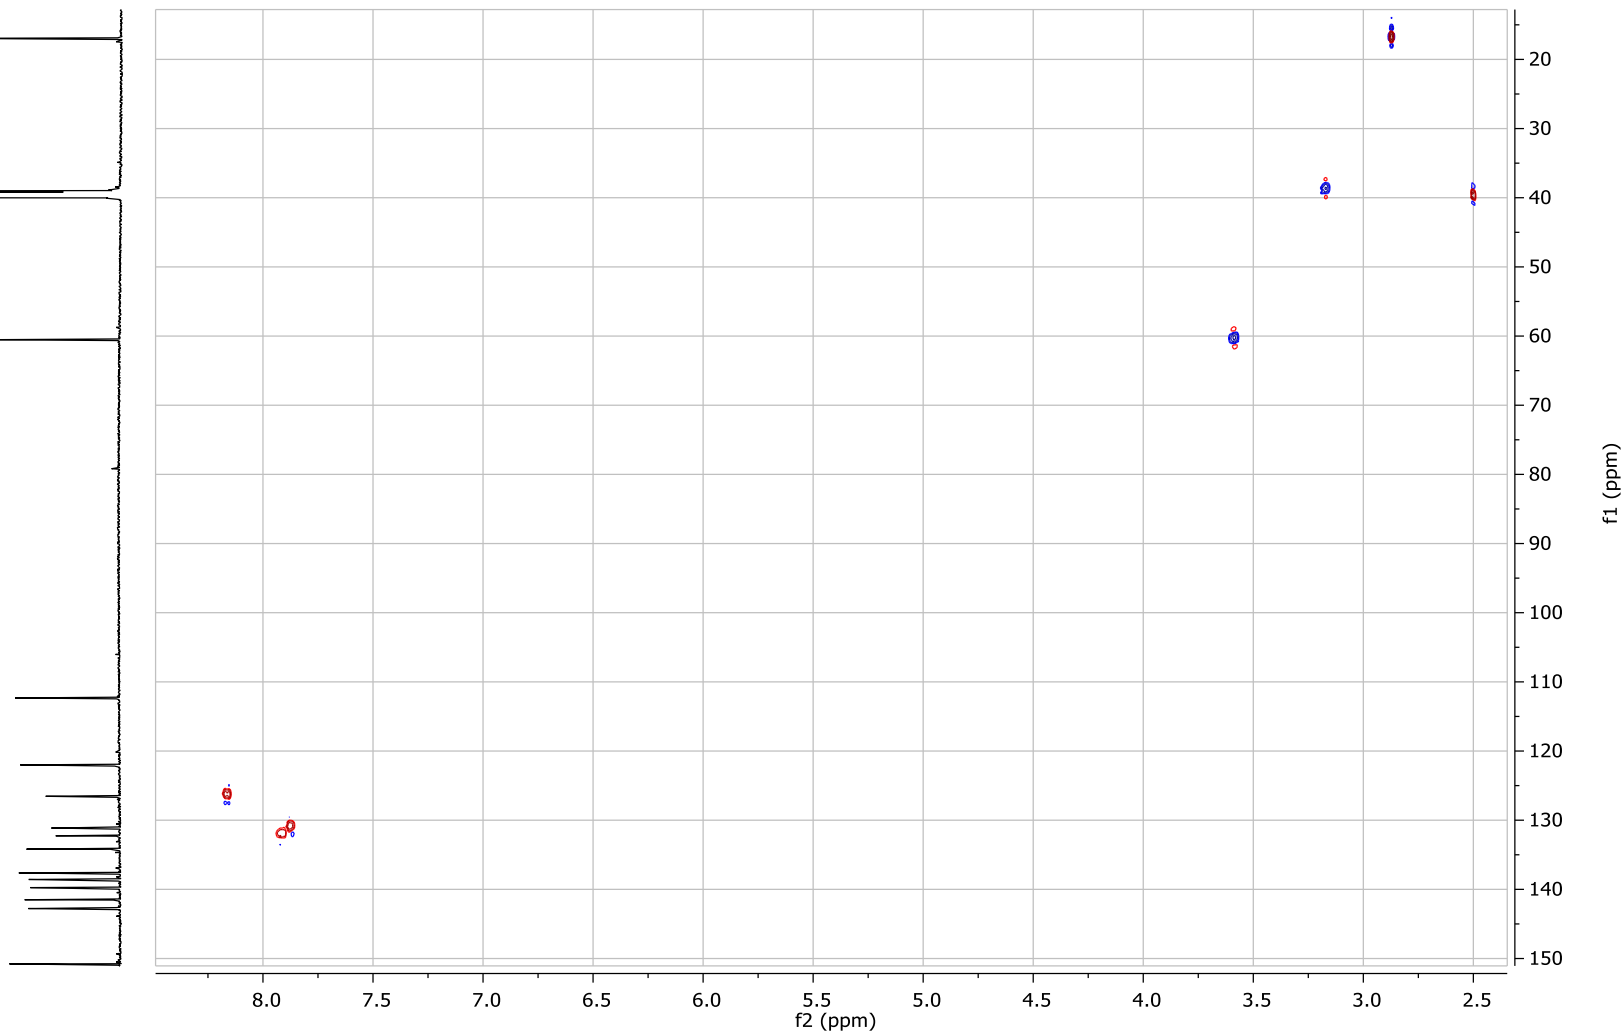

HSQC (full)

S117

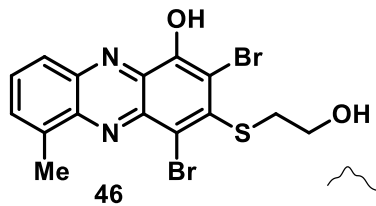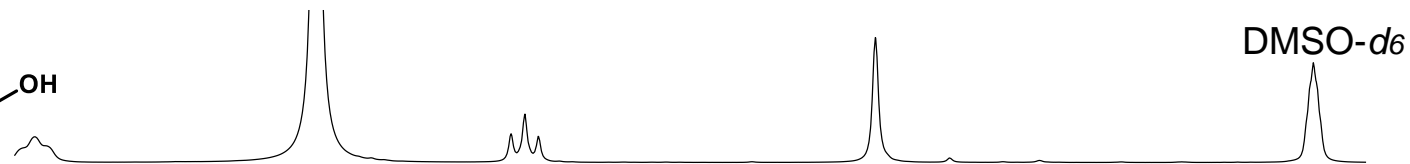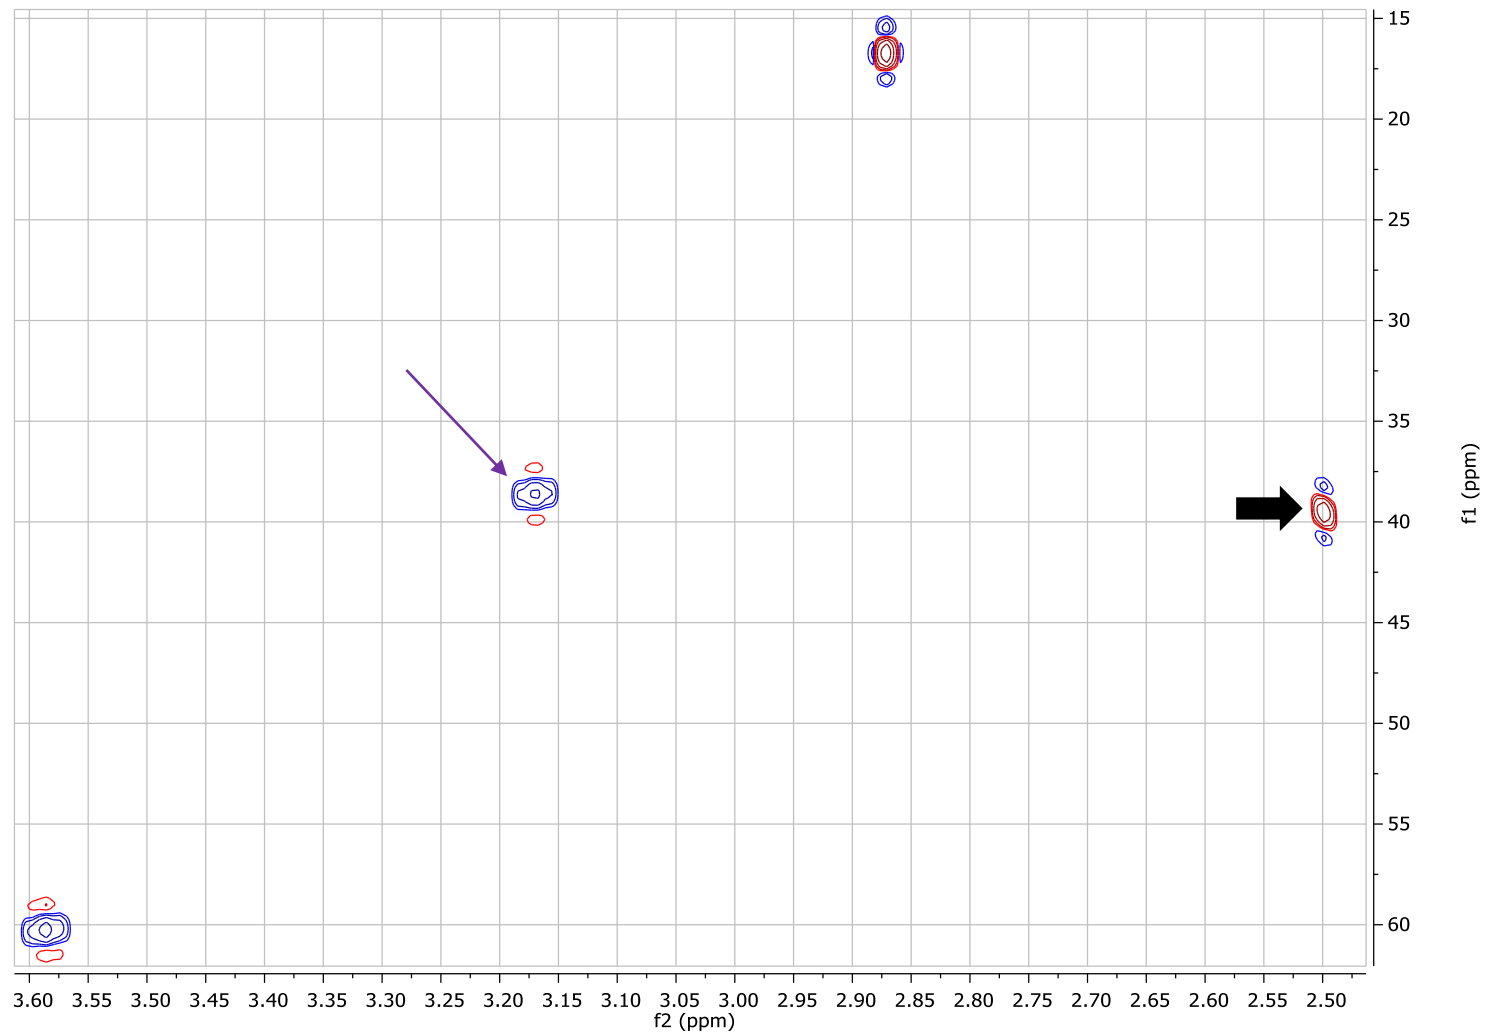

Carbon Signal  
at 38.9 ppm

DMSO-*d*<sub>6</sub>

f1 (ppm)

f2 (ppm)

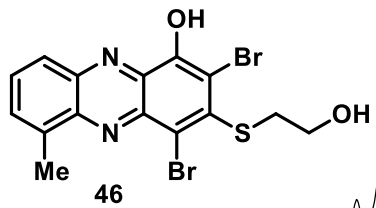

DMSO-*d*<sub>6</sub>

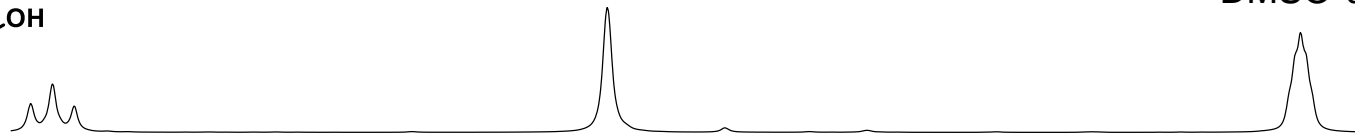

Carbon Signal  
at 38.9 ppm

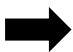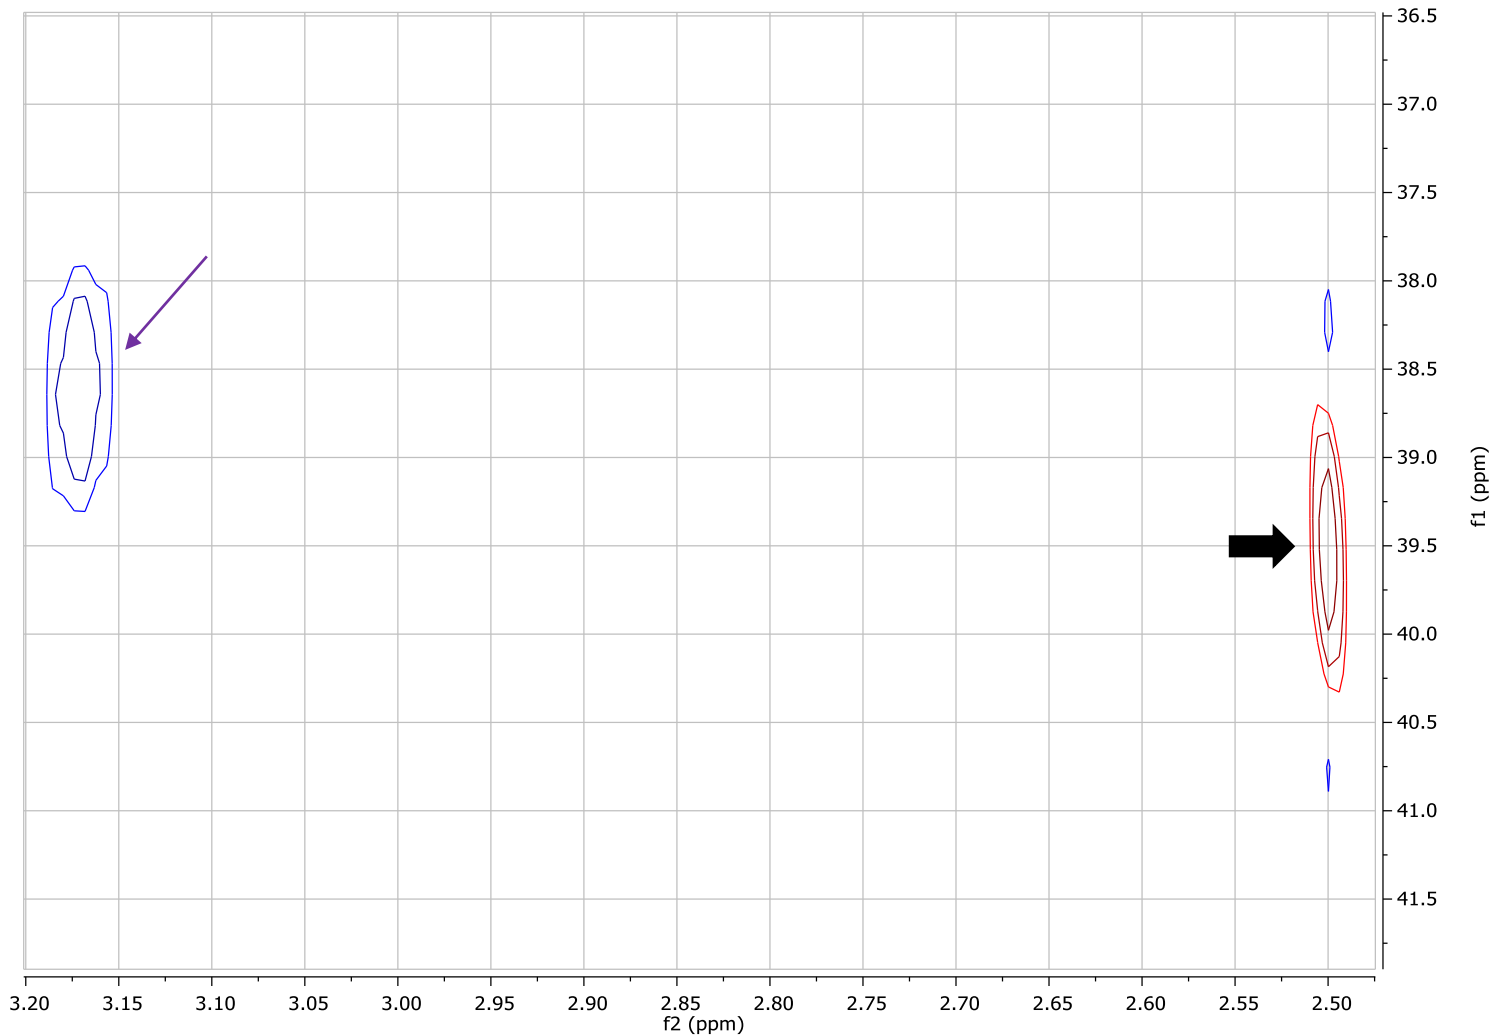

HSQC (zoomed in to assign carbon signal)

S119

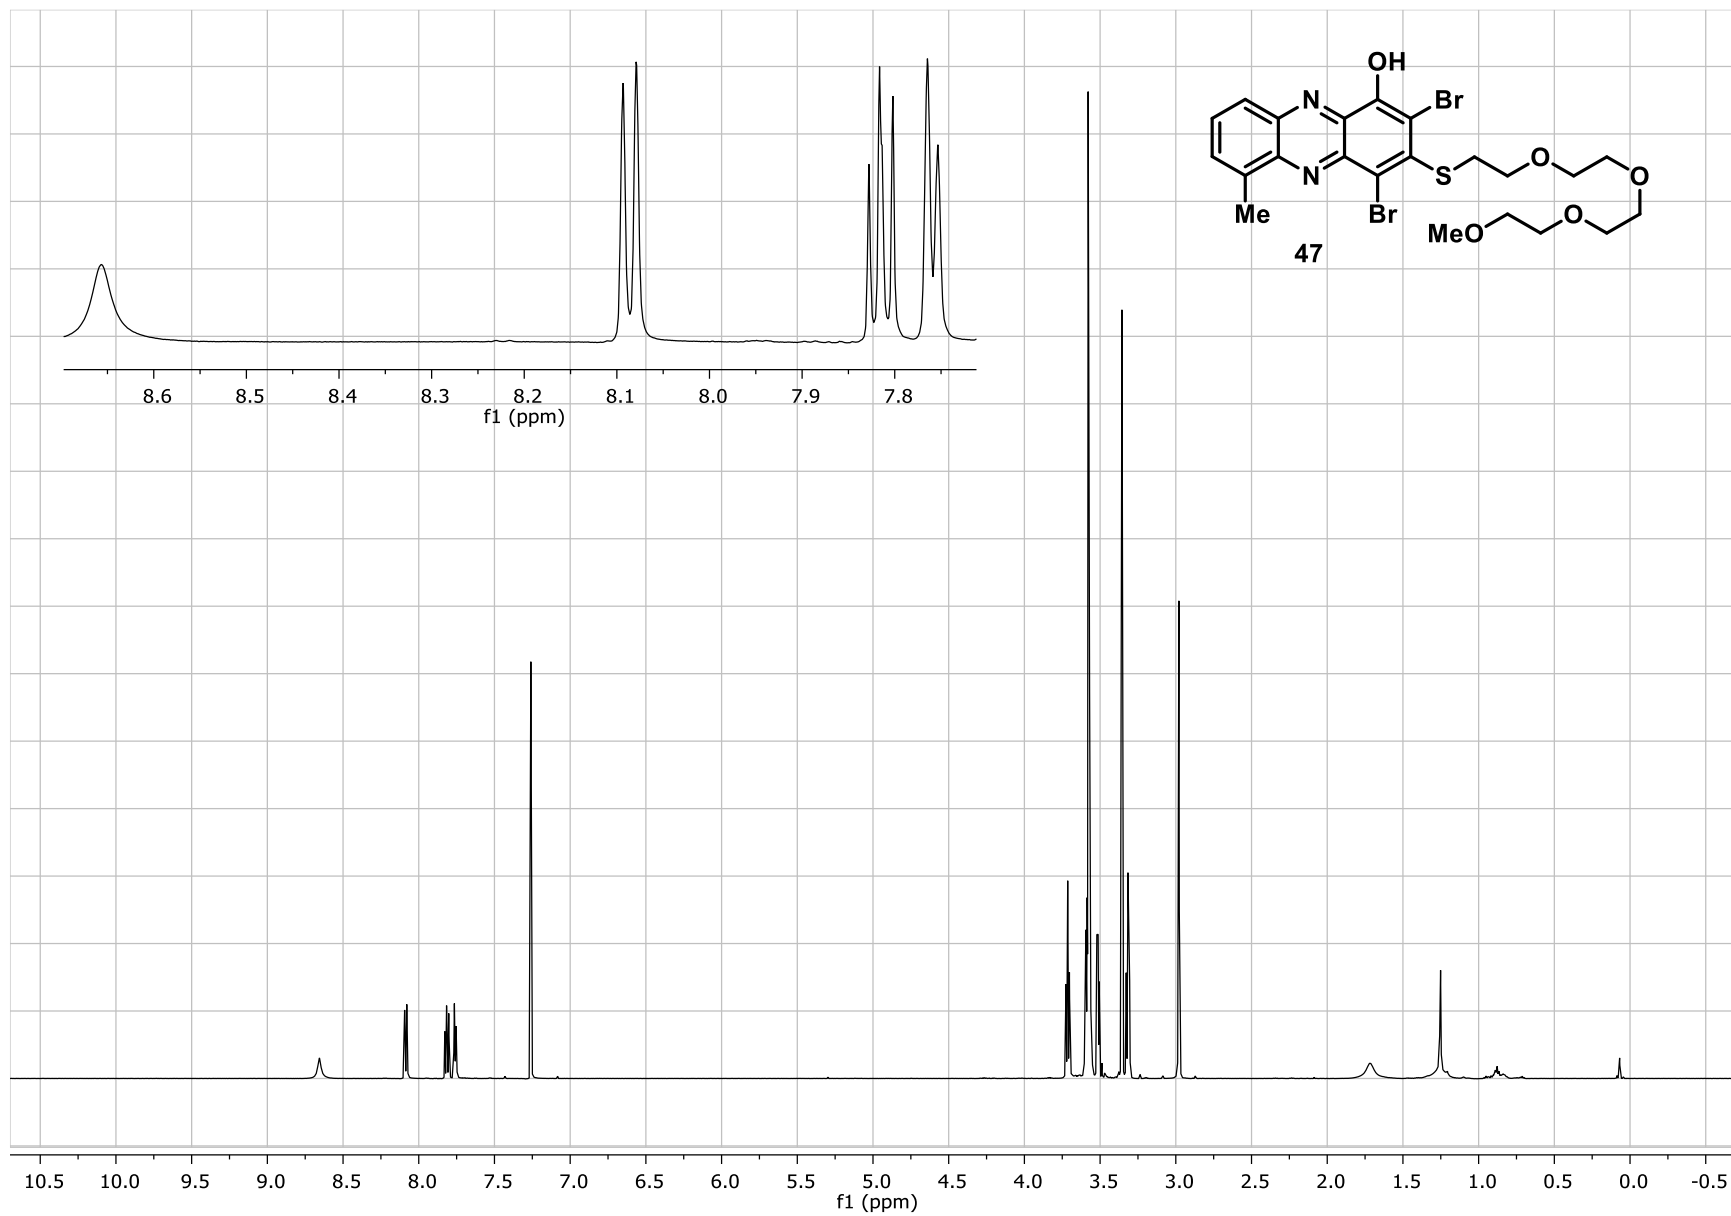

S120



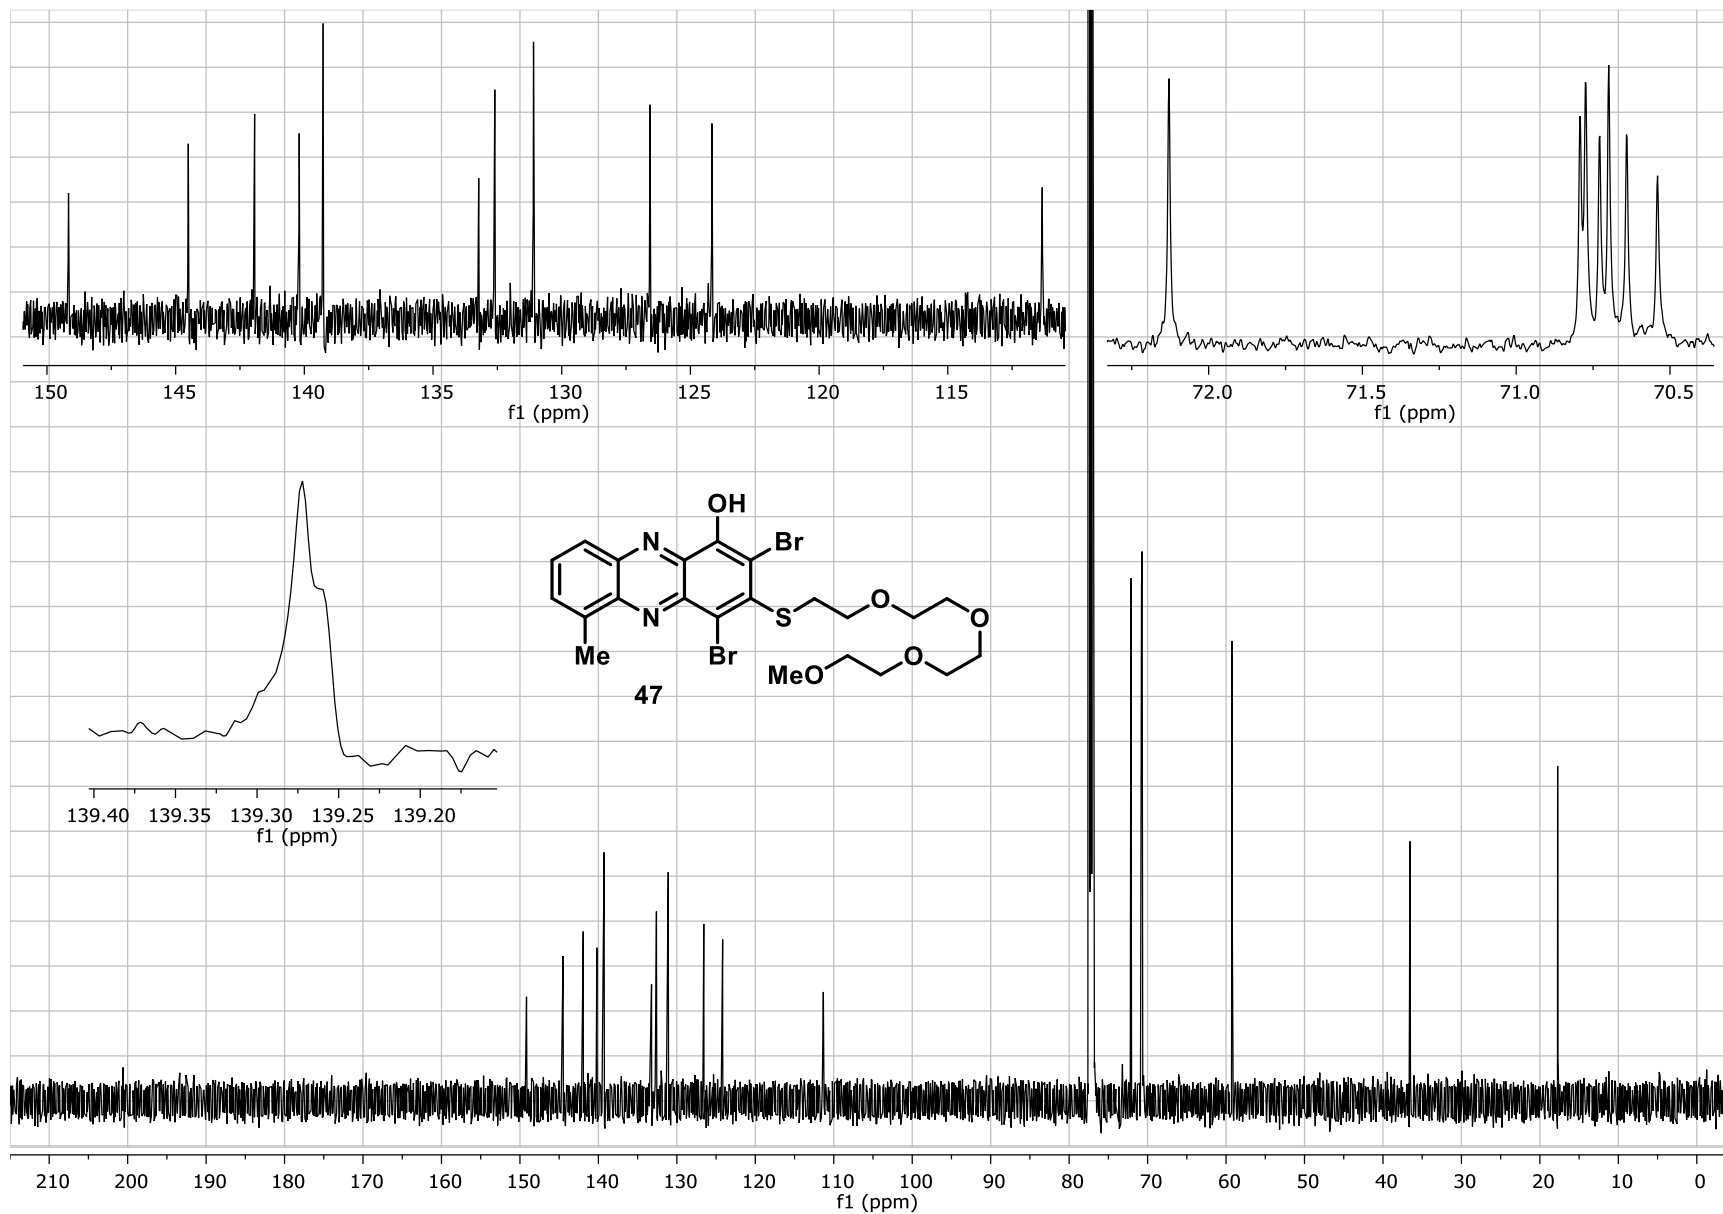

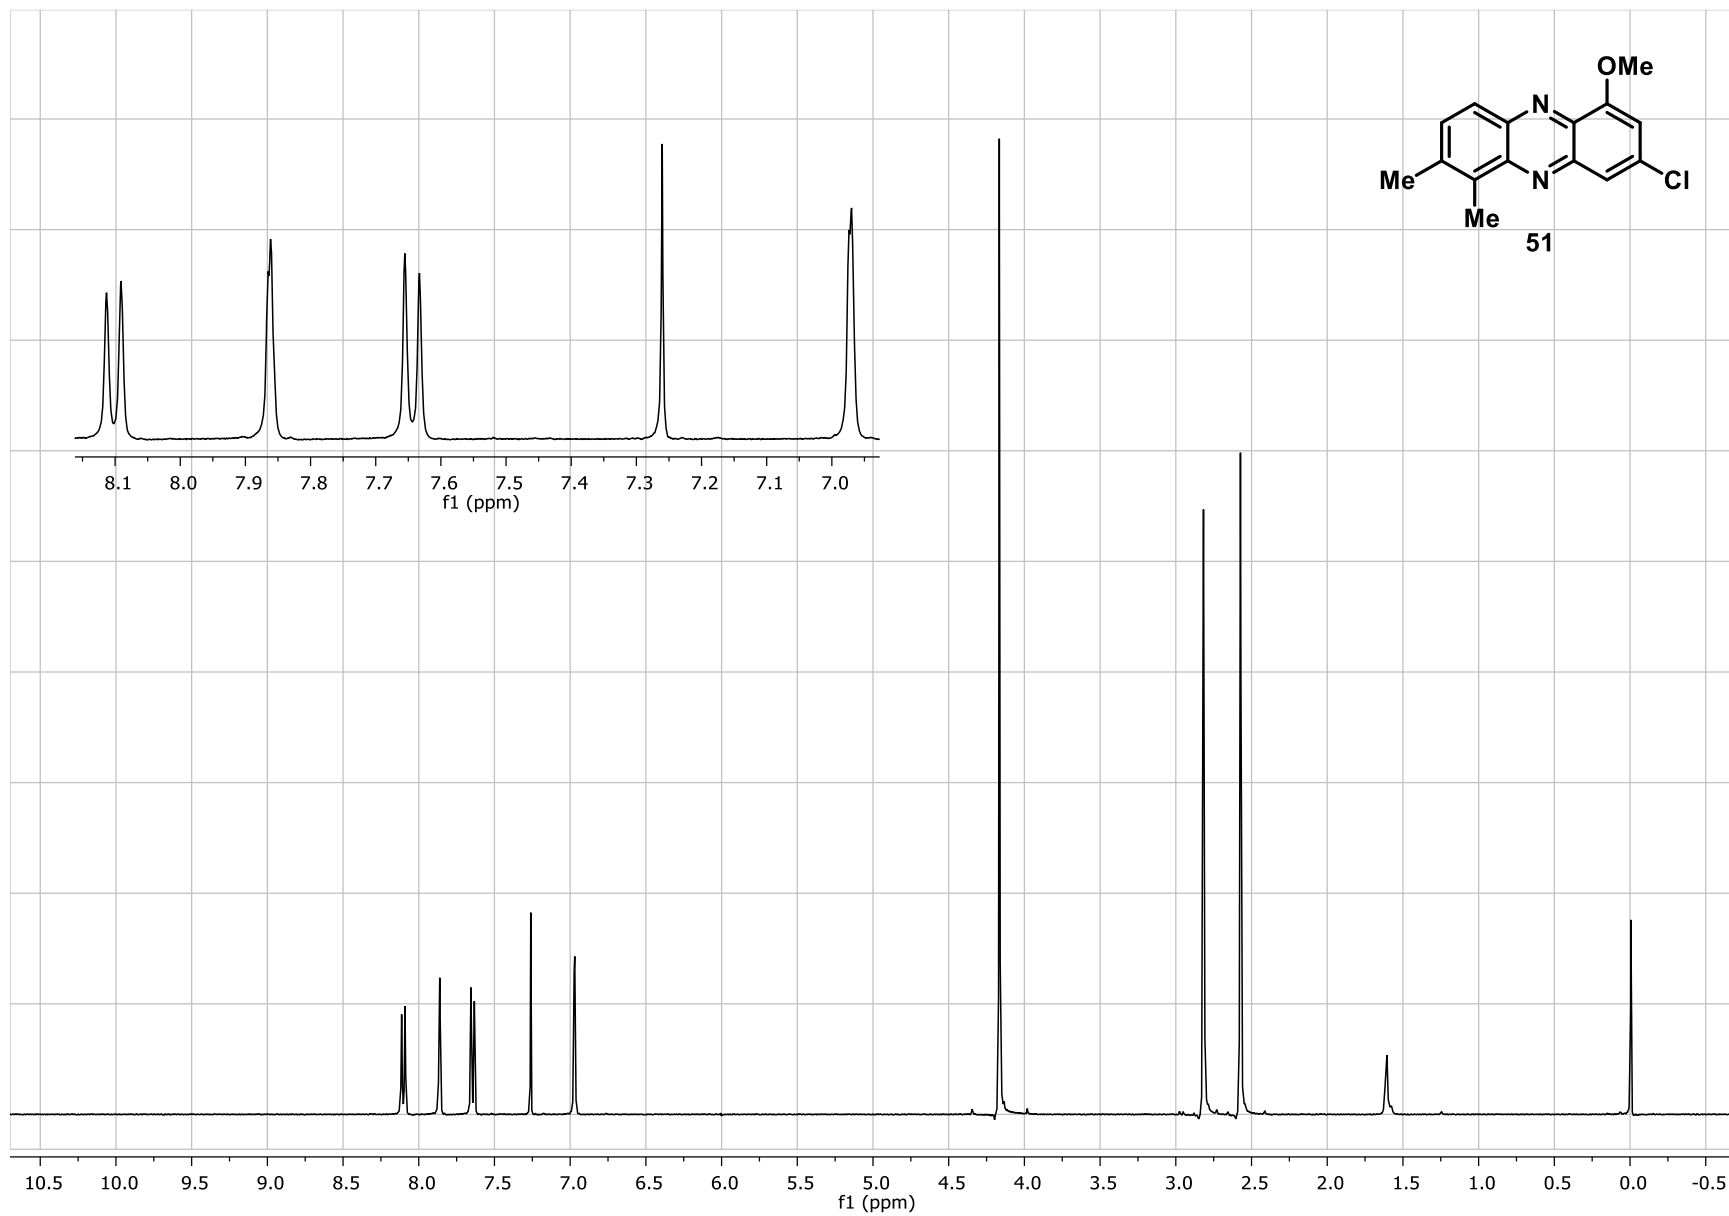

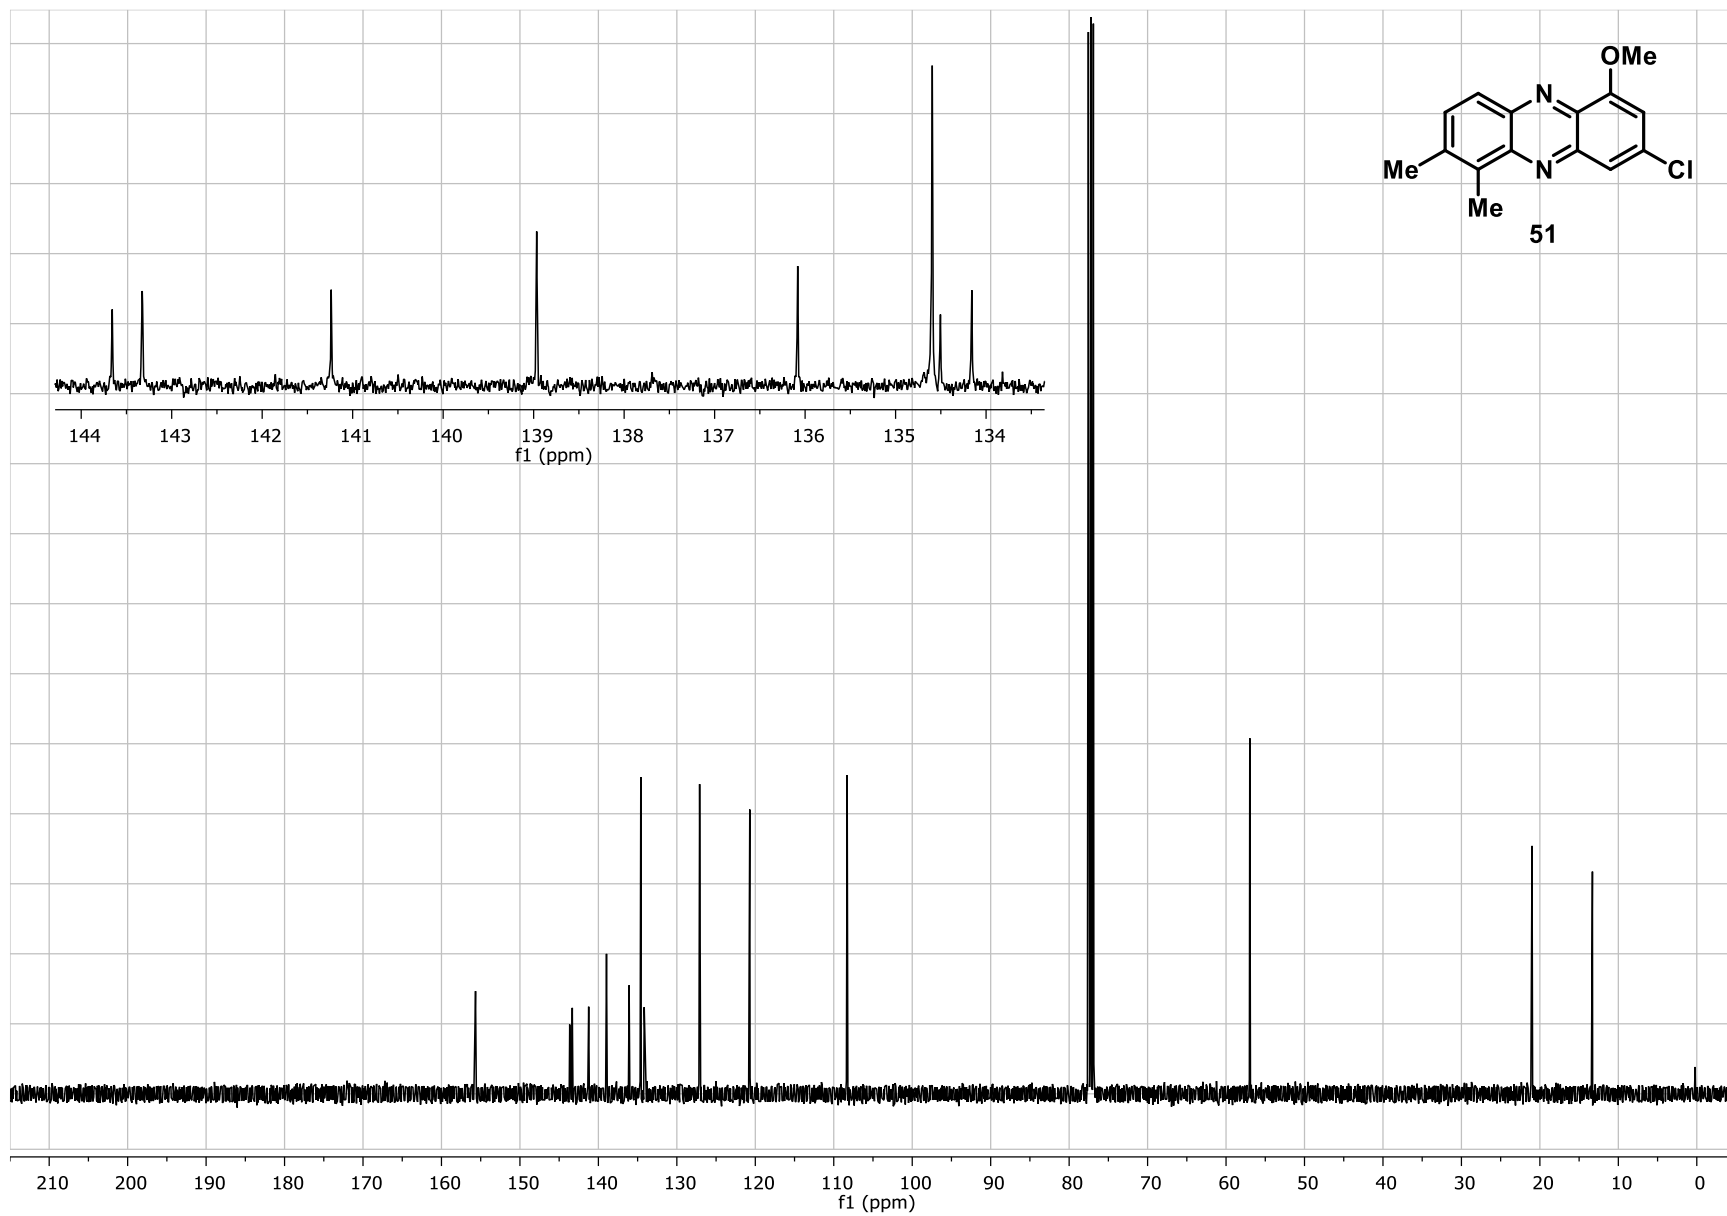

S123

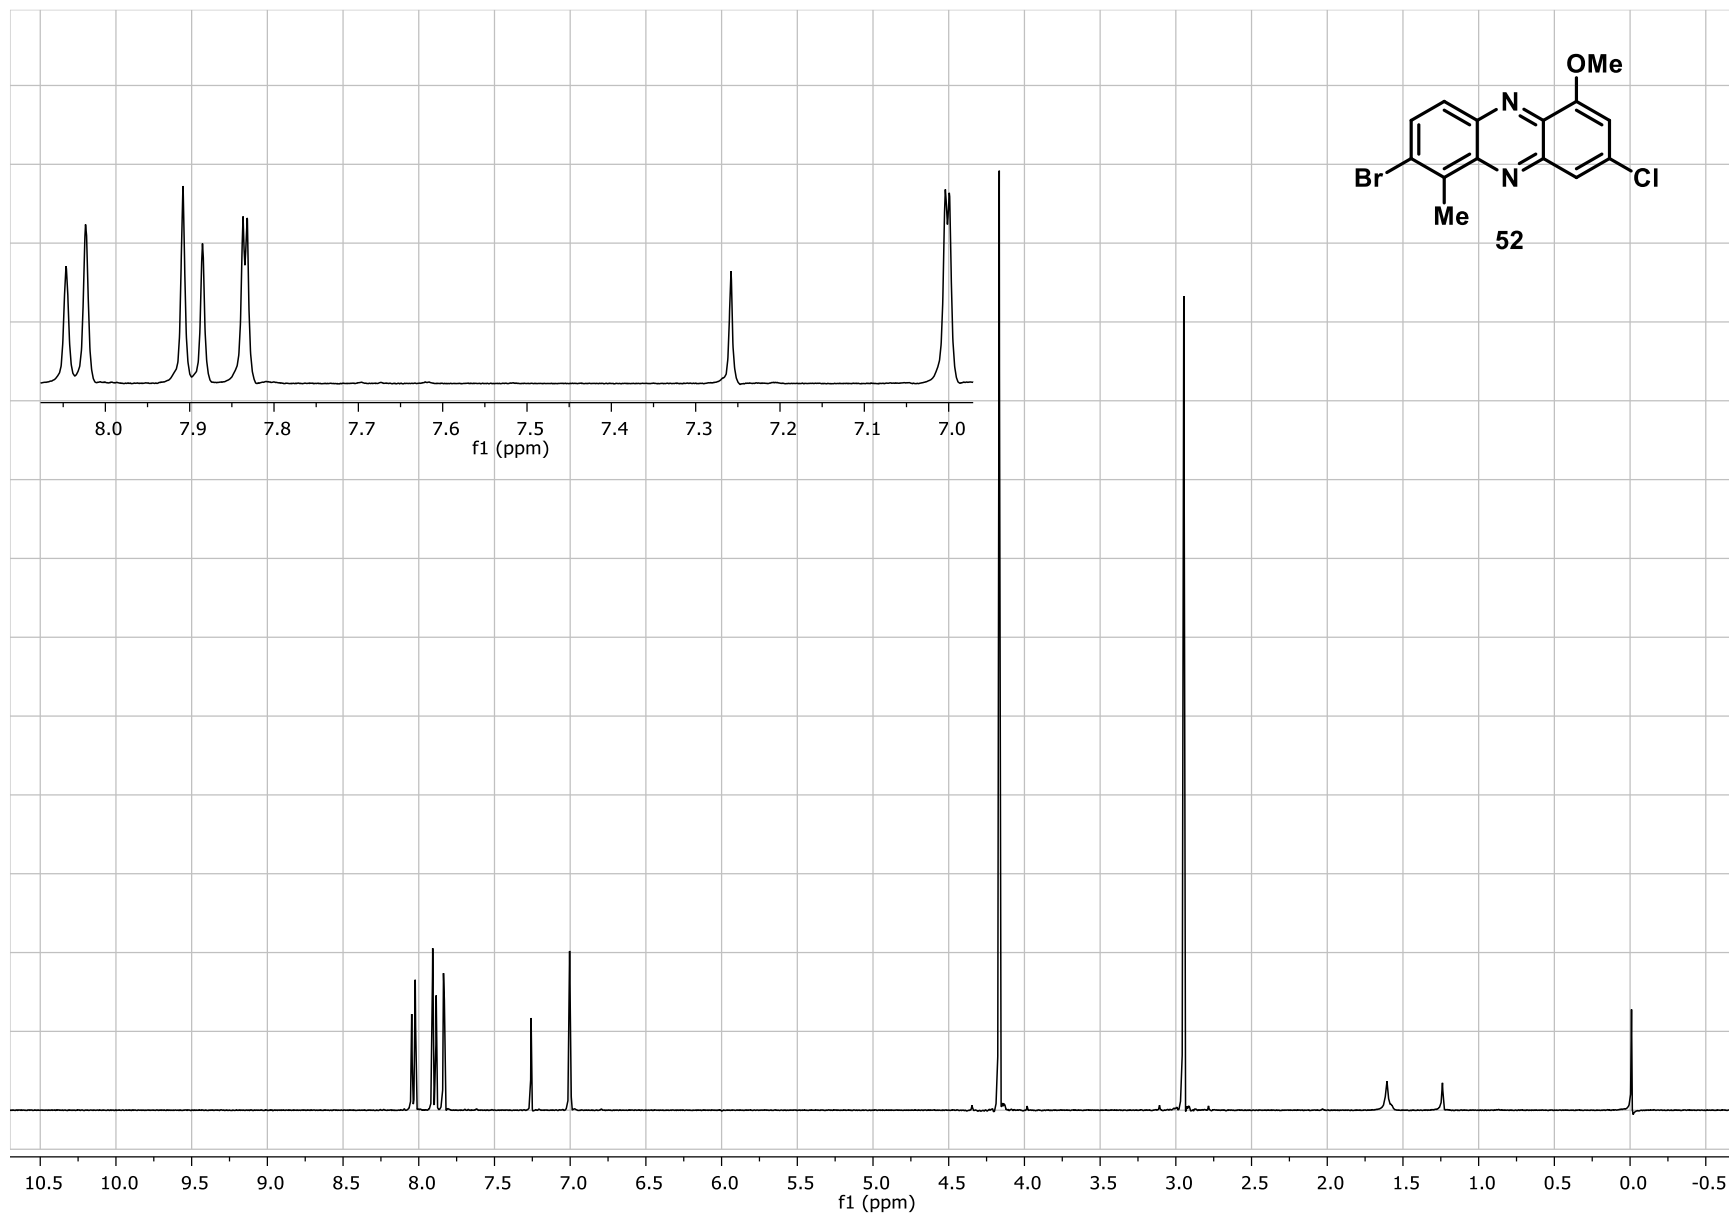

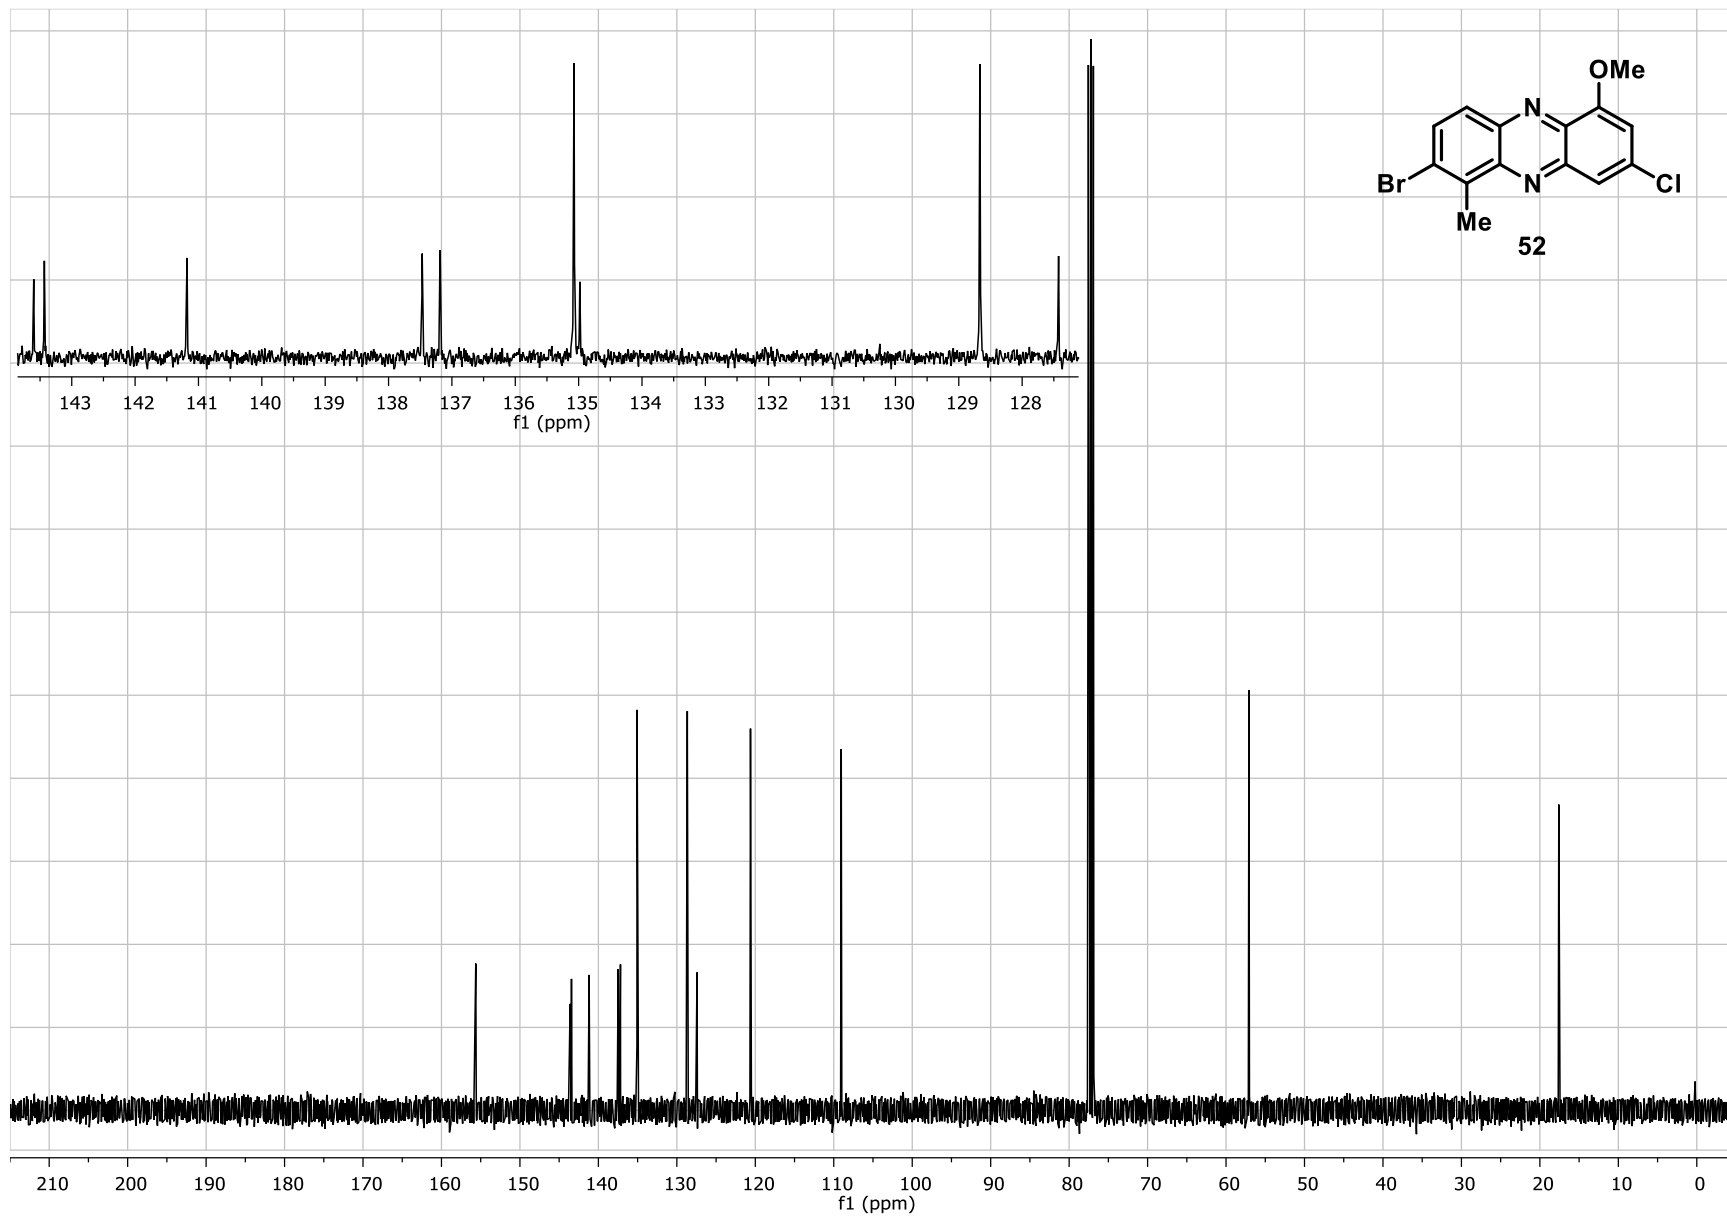

S125

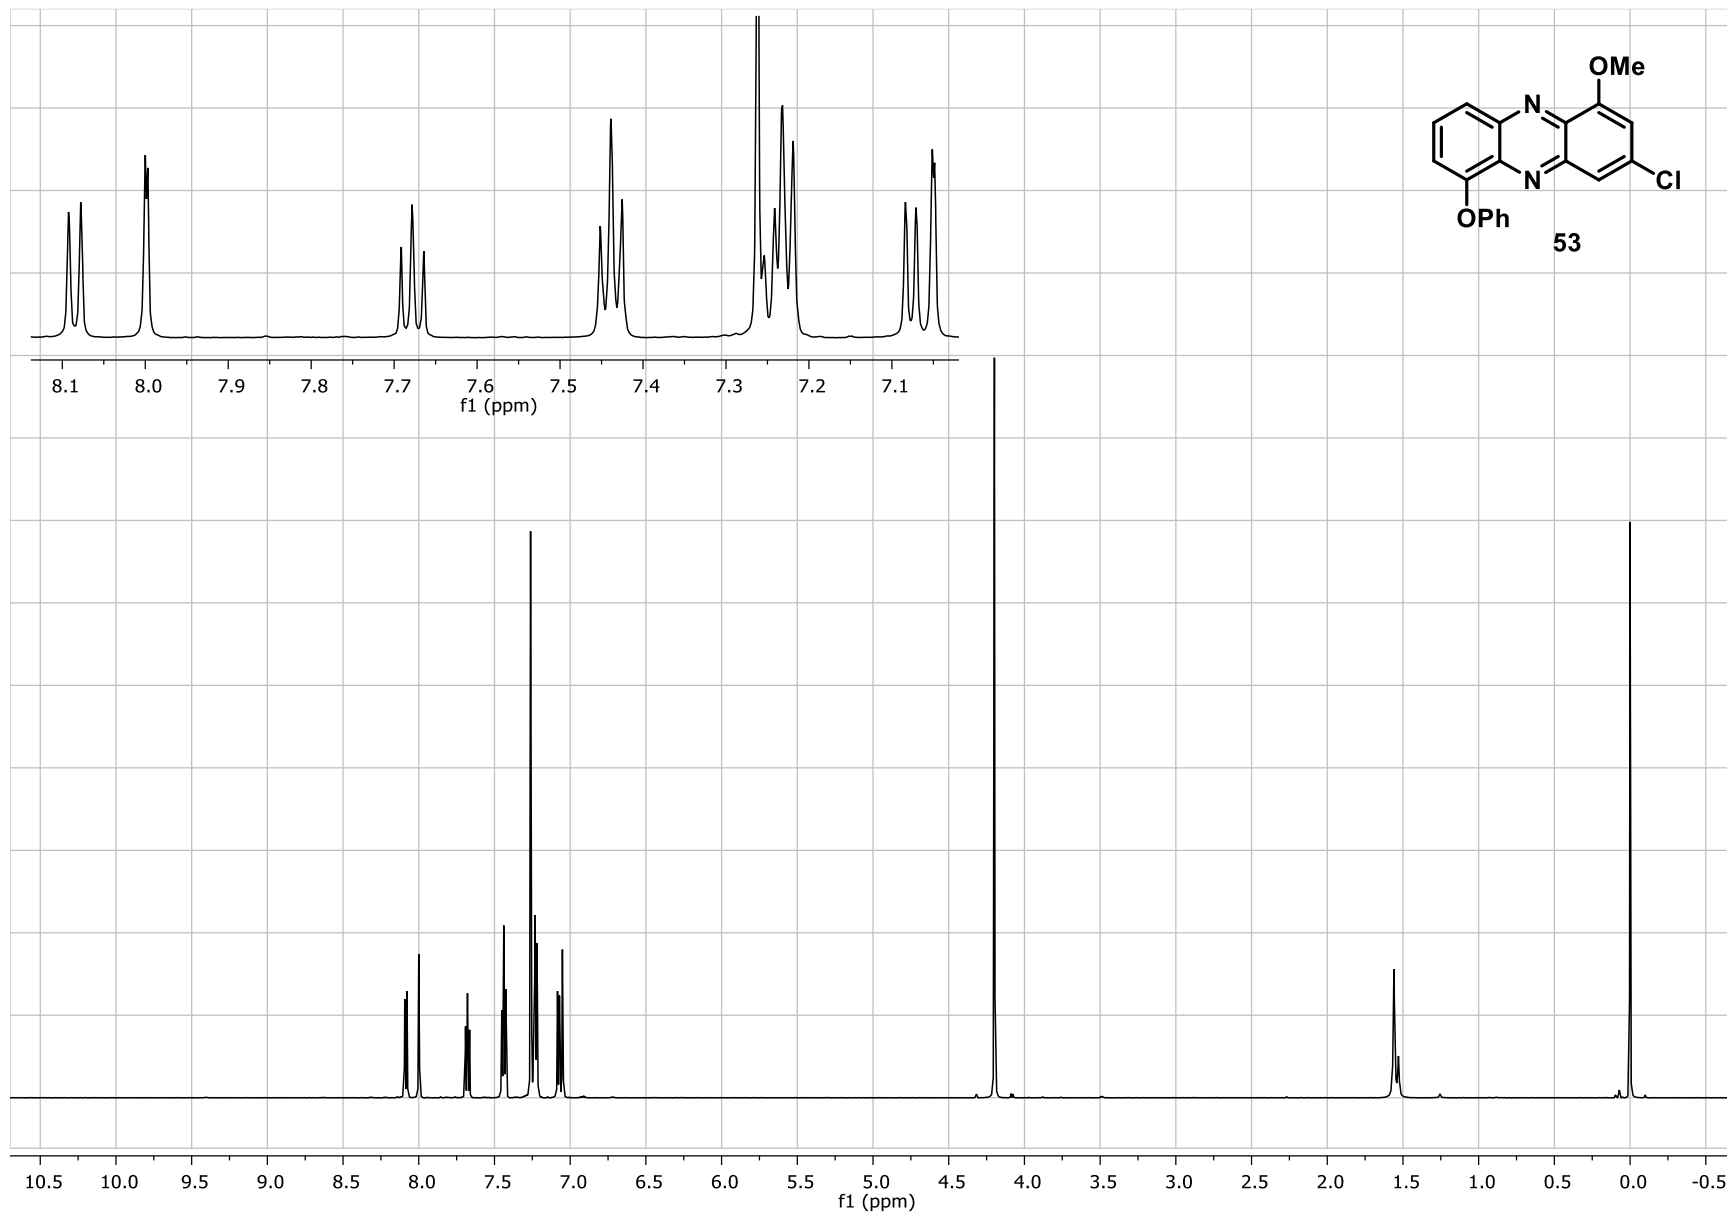

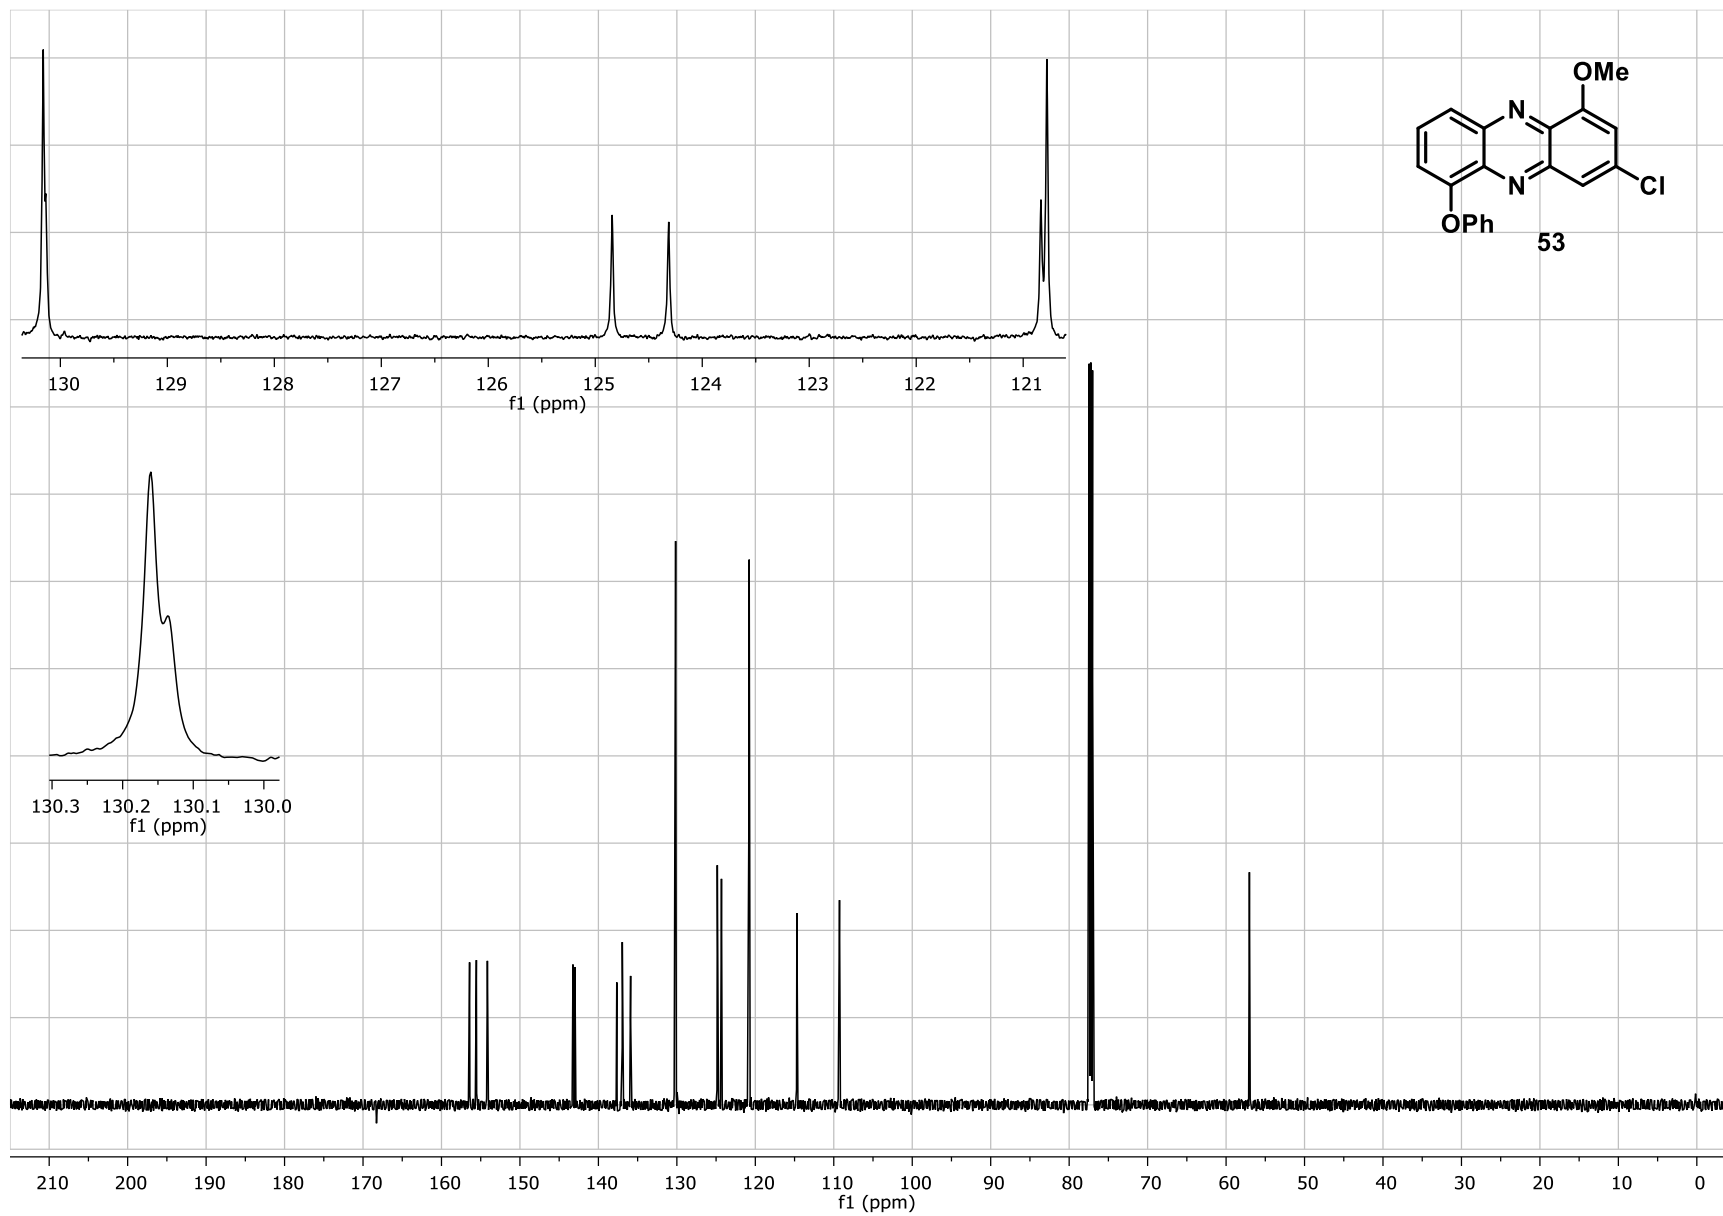

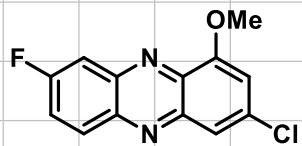

54

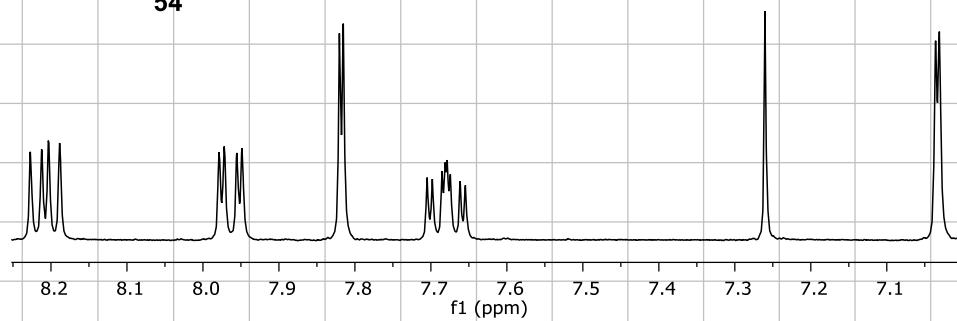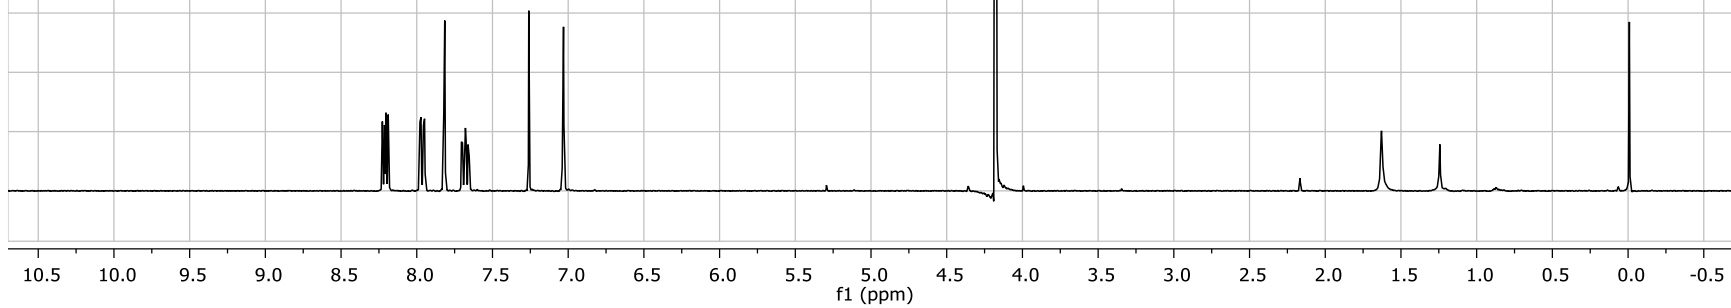

S128



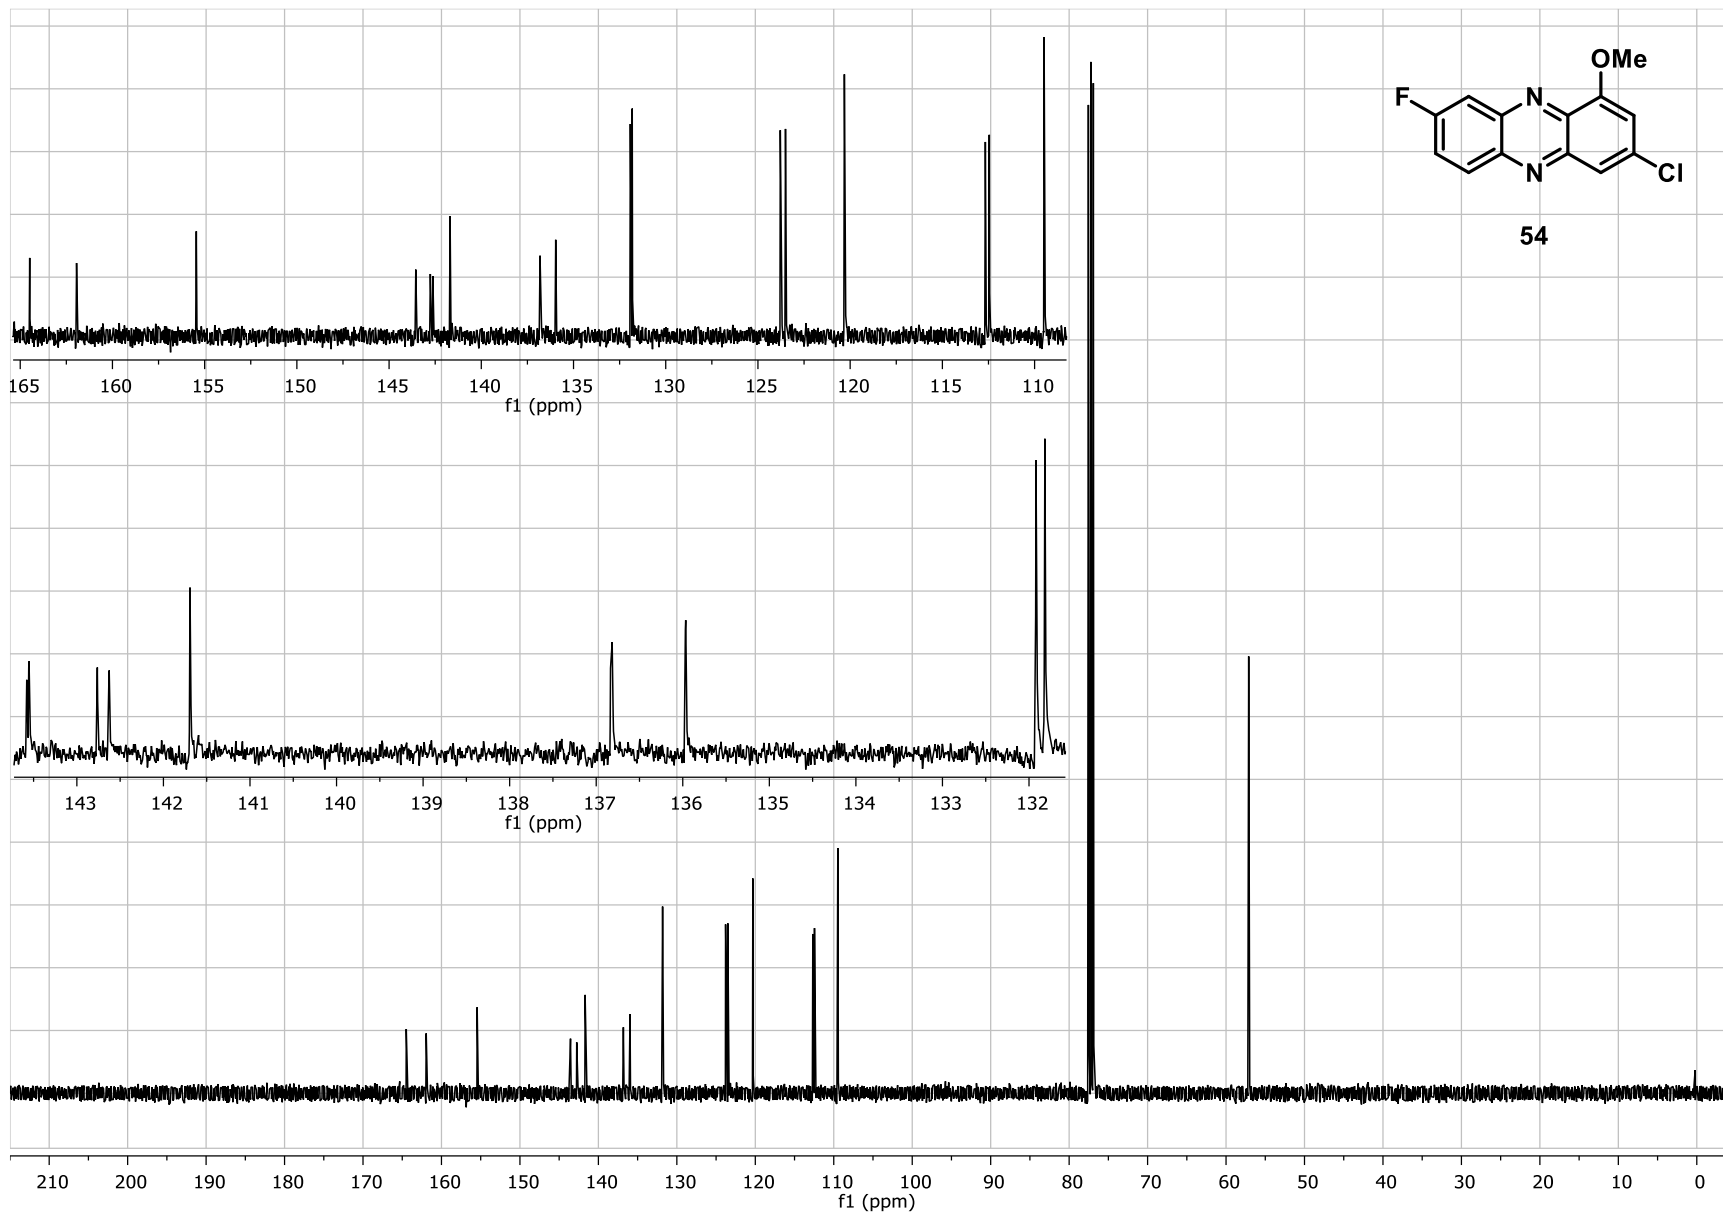

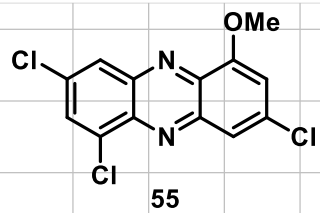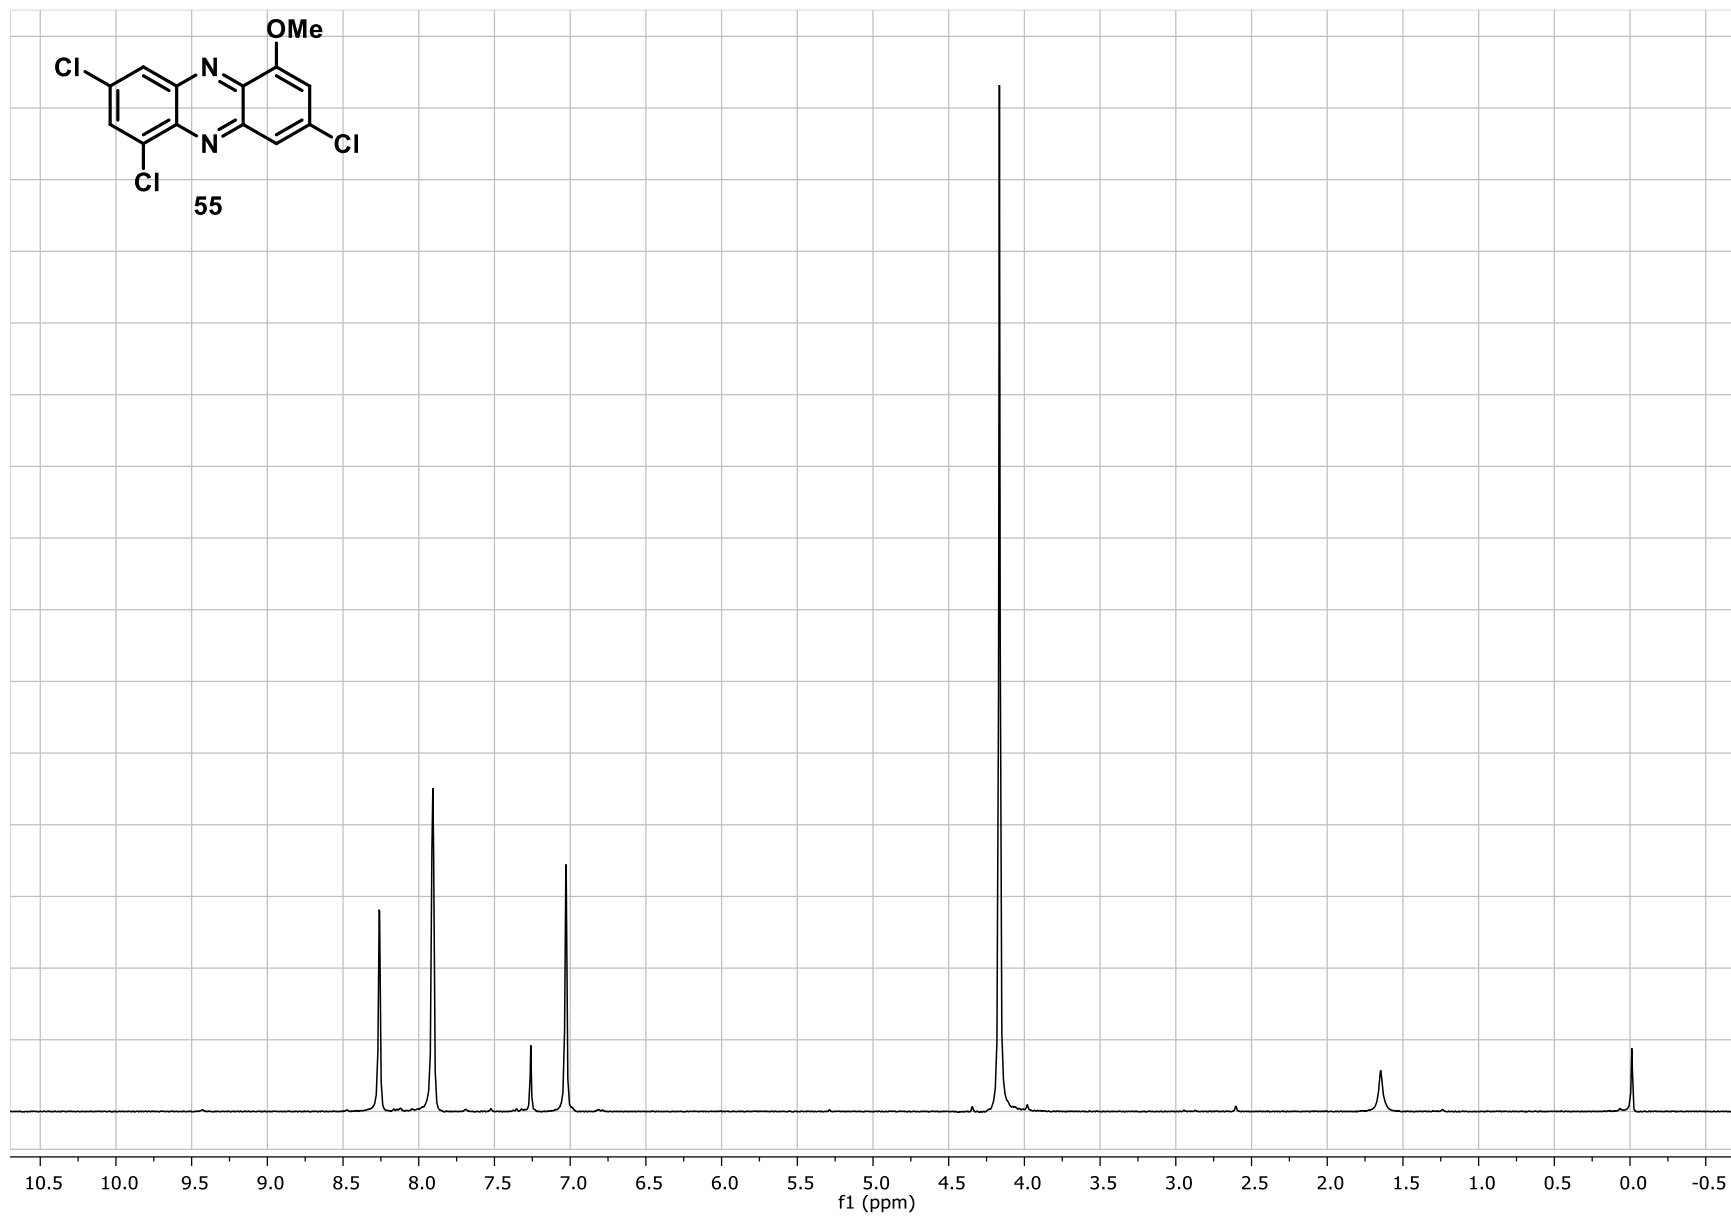

S130

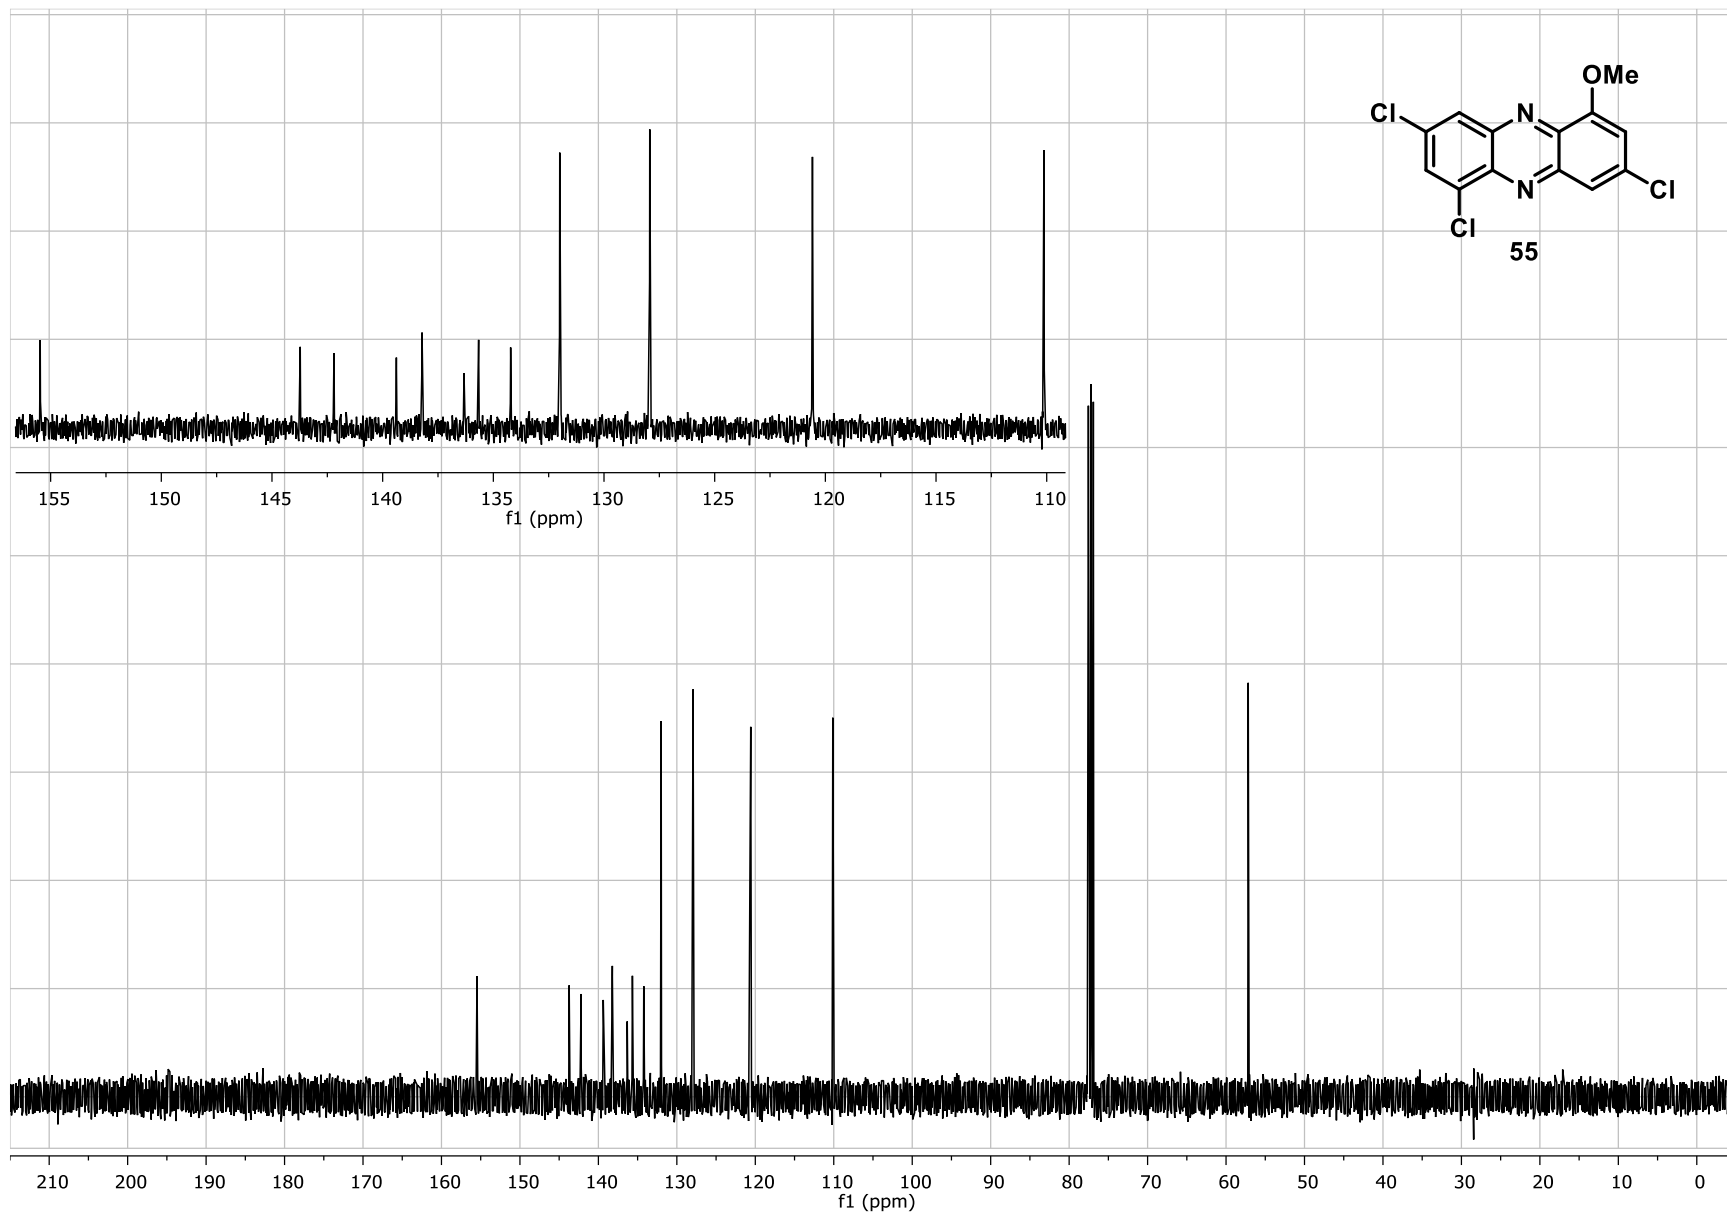

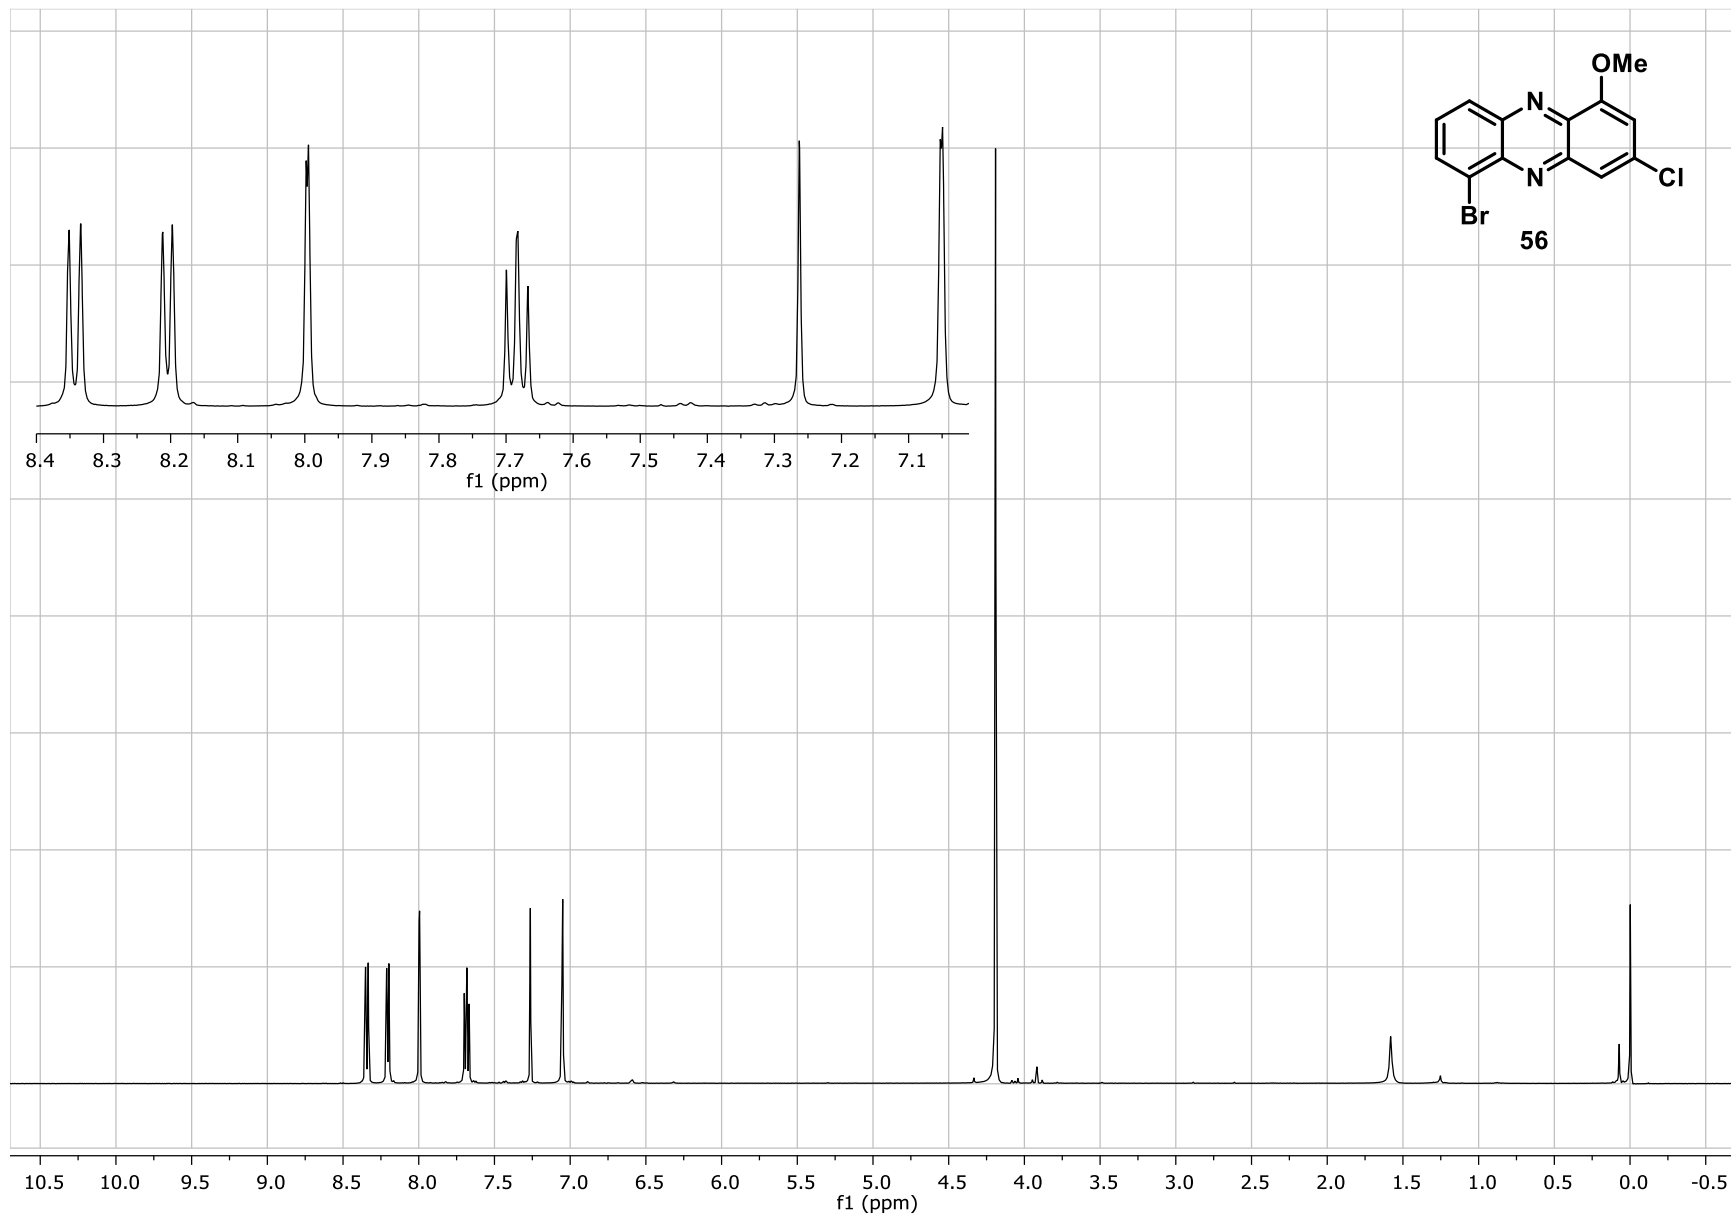

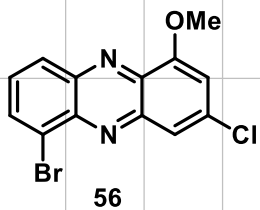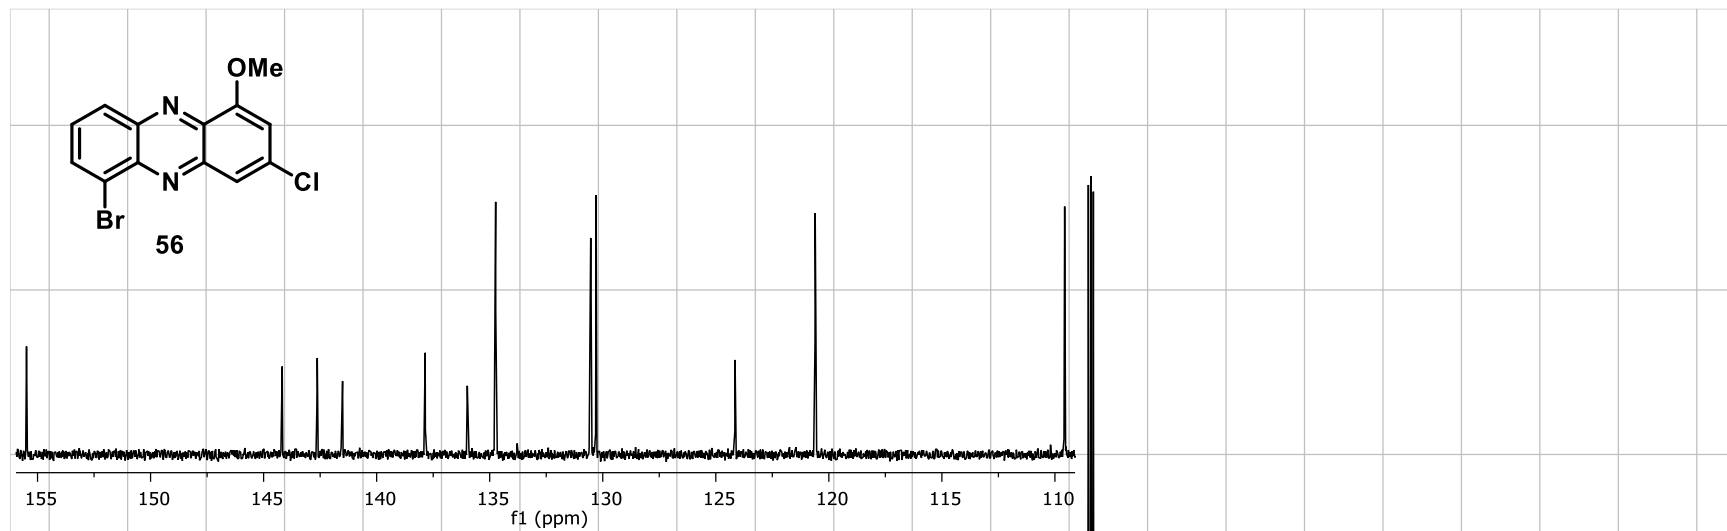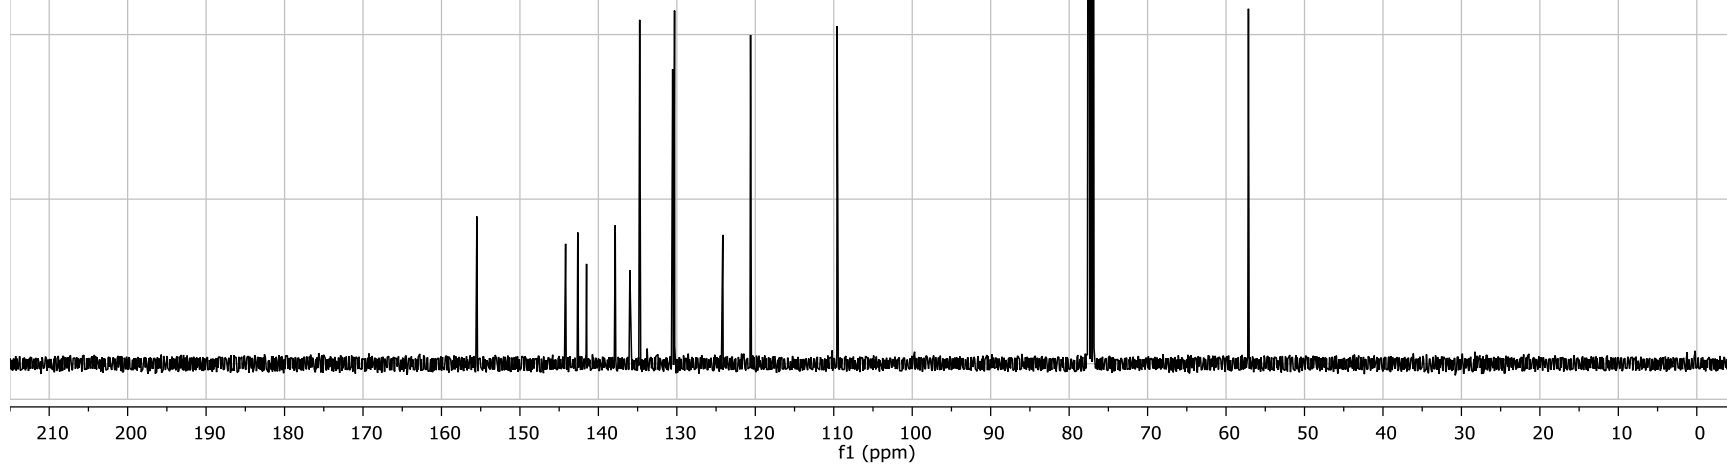

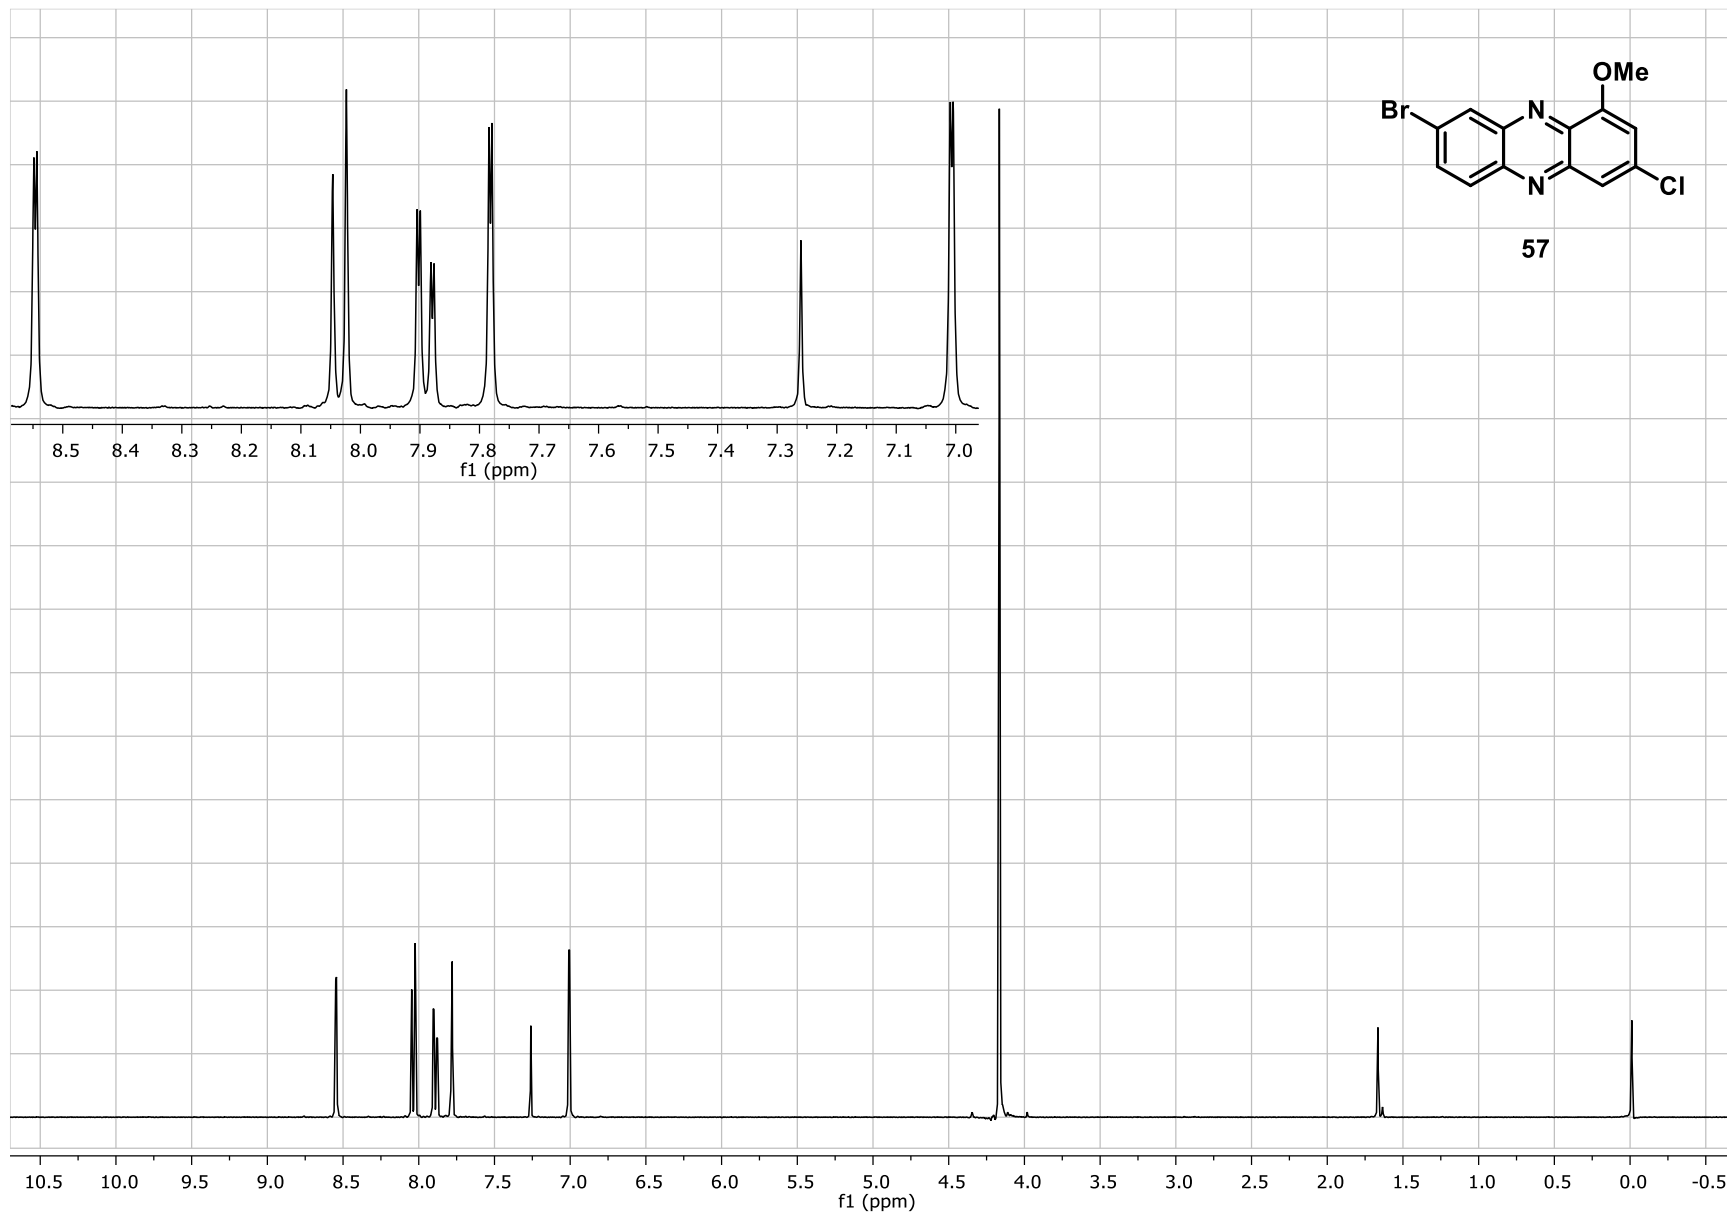

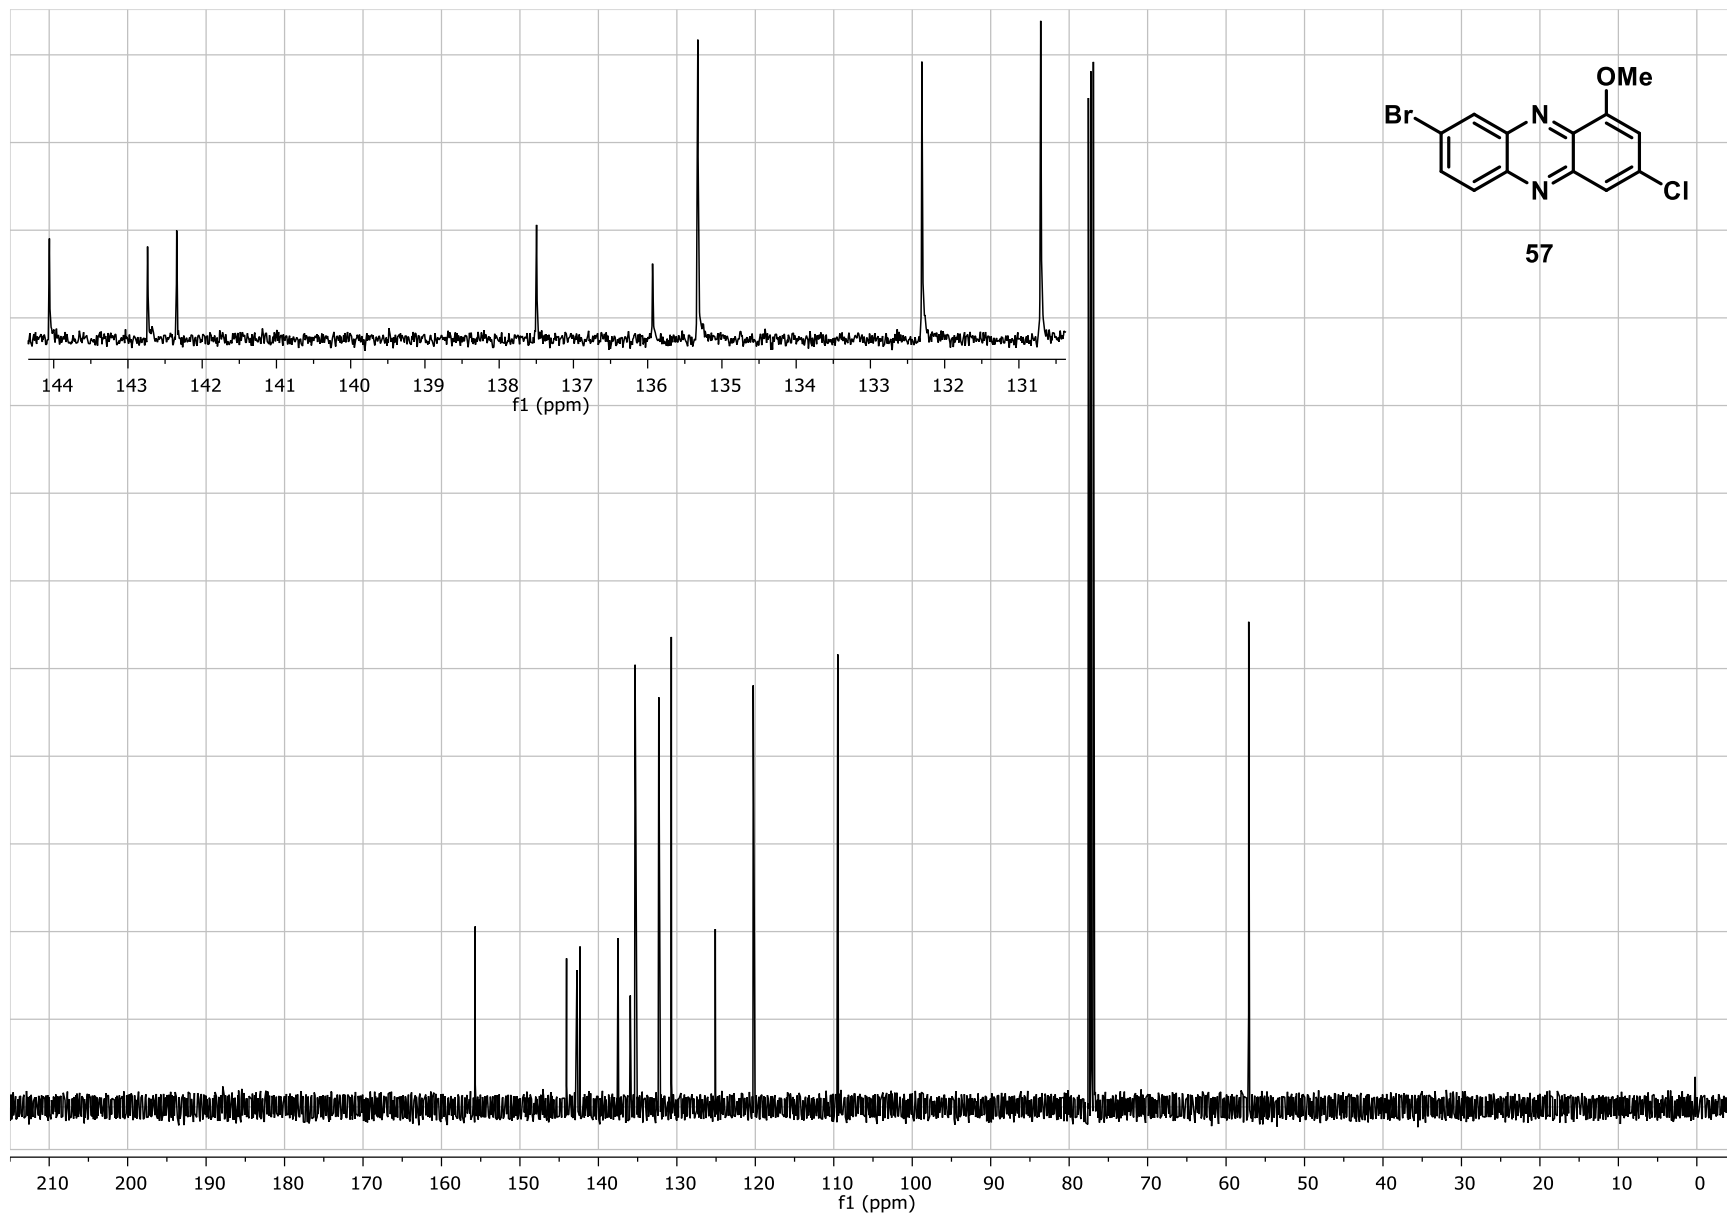

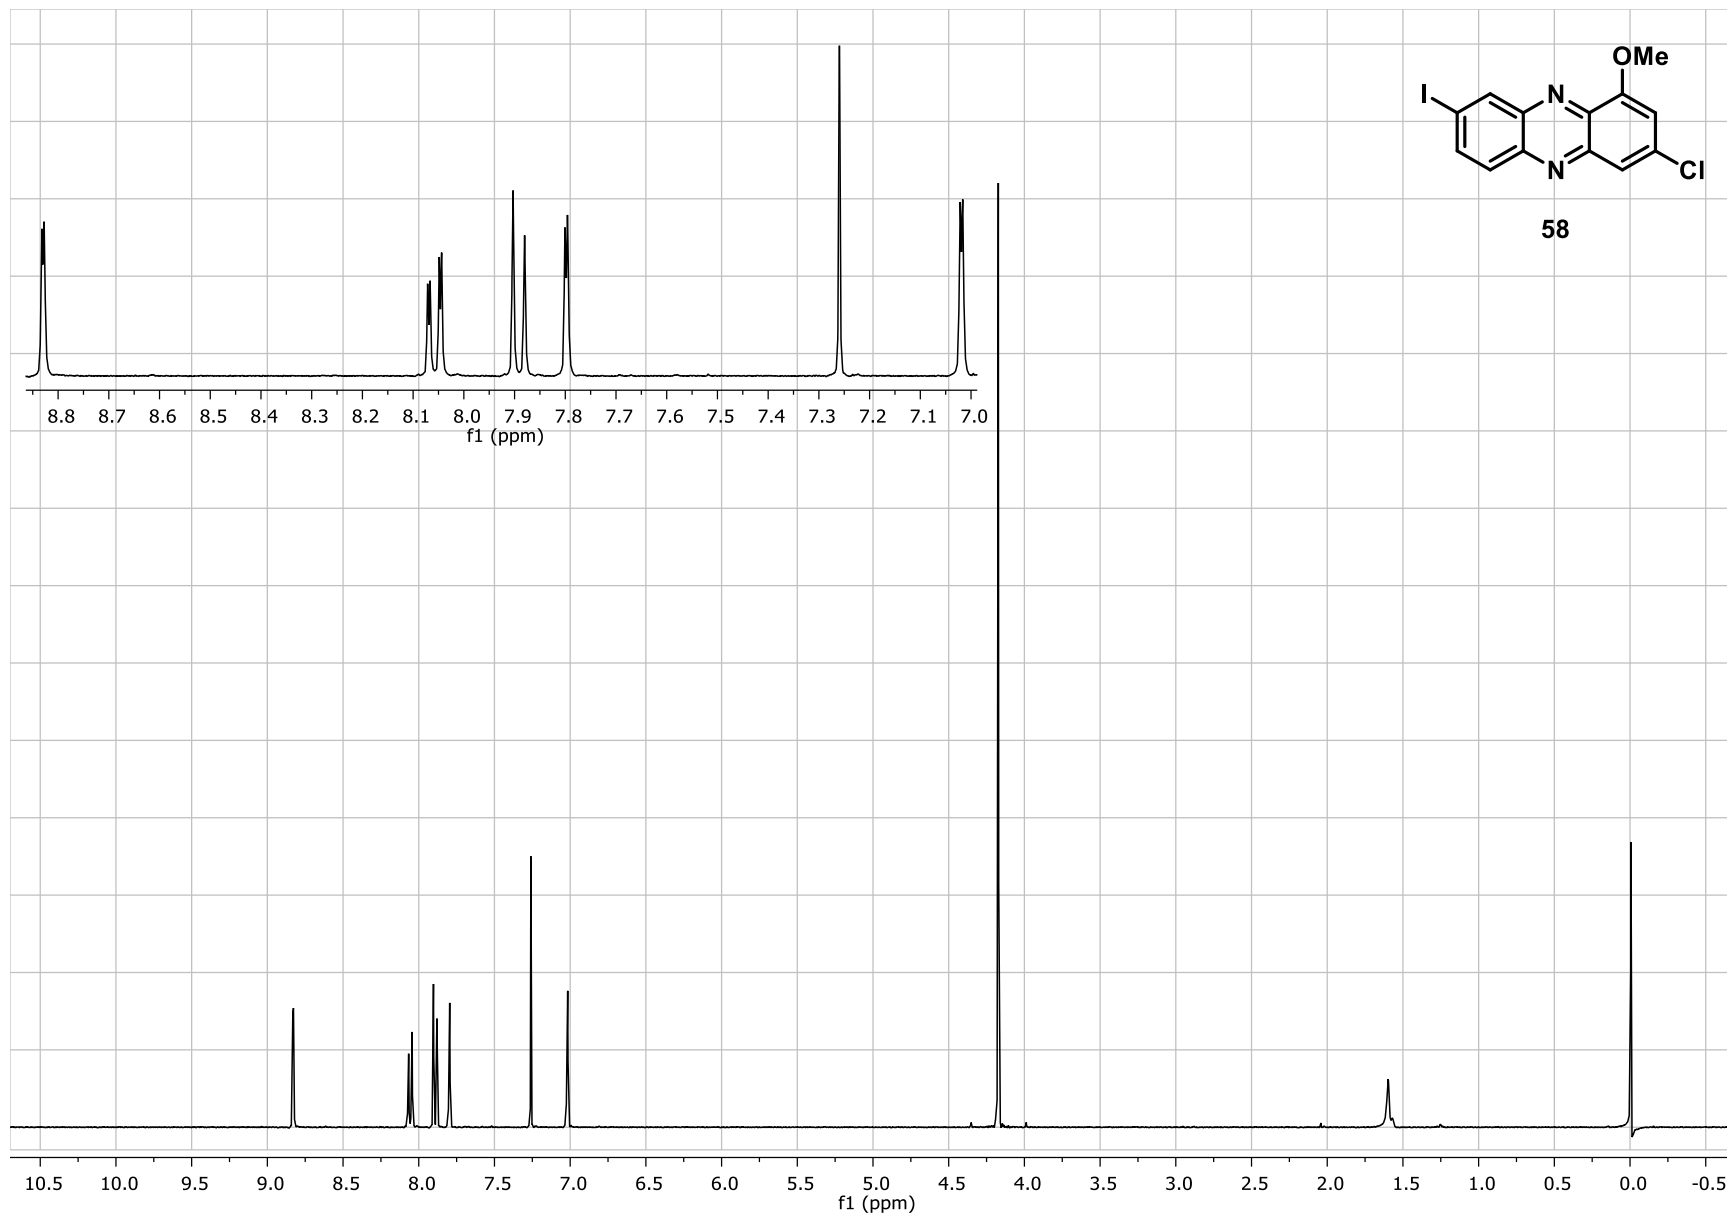



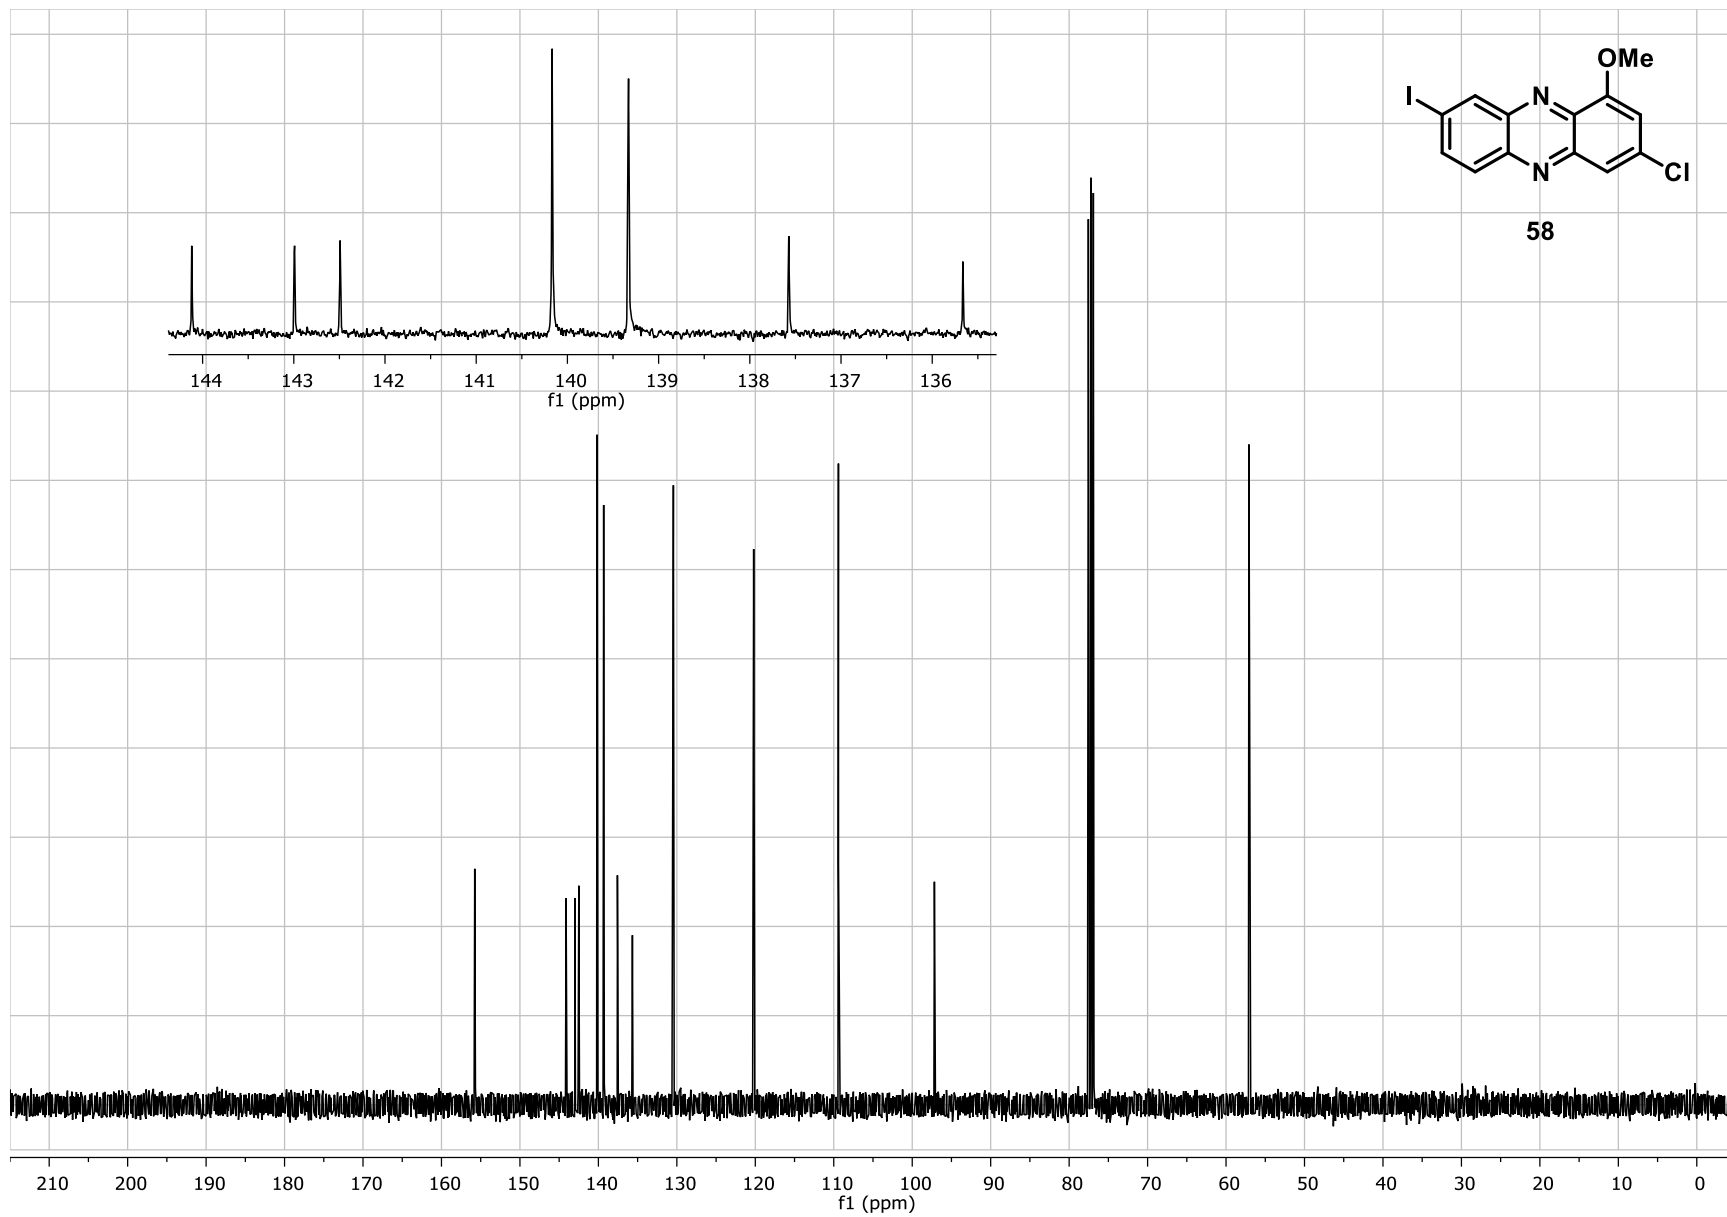

S137
